# Supplementary material for: Site- and enantioselective cross-coupling of saturated N-heterocycles with carboxylic acids by cooperative Ni/photoredox catalysis
Source: Springer Nature journal article supplement (doi:10.1038/s41467-023-35800-0), 2023-01-09
Supplement: MOESM1 [file 41467_2023_35800_MOESM1_ESM.pdf]

# Site- and enantioselective cross-coupling of saturated *N*-heterocycles with carboxylic acids by cooperative Ni/photoredox catalysis

Xiaomin Shu, De Zhong, Qian Huang, Leitao Huan, and Haohua Huo\*

State Key Laboratory of Physical Chemistry of Solid Surfaces, Key Laboratory of Chemical Biology of Fujian Province, and College of Chemistry and Chemical Engineering, Xiamen University, Xiamen 361005, China

E-mail: hhuo@xmu.edu.cn

X.S. and D.Z. contributed equally to this work.

## Supplementary Information

### Table of Contents

|                                                                               |              |
|-------------------------------------------------------------------------------|--------------|
| <b>I. Supplementary Methods</b>                                               | <b>S-2</b>   |
| 1.1 General Information                                                       | S-2          |
| 1.2 Preparation of Chiral Ligand ( <i>S</i> , <i>R</i> )-L1                   | S-3          |
| 1.3 Optimization of Reaction Conditions                                       | S-4          |
| 1.4 Catalytic Enantioselective $\alpha$ -Acylation of Saturated Azacycles     | S-11         |
| 1.5 Synthetic Utility                                                         | S-46         |
| 1.6 Mechanistic Studies                                                       | S-56         |
| 1.7 Assignment of Absolute Configuration                                      | S-63         |
| 1.8 $^1\text{H}$ -NMR, $^{13}\text{C}$ -NMR, and $^{19}\text{F}$ -NMR Spectra | S-65         |
| 1.9 Stereoselectivity Analysis                                                | S-143        |
| <b>II. Supplementary References</b>                                           | <b>S-200</b> |

## I. Supplementary Methods

### 1.1 General Information

Unless otherwise noted, reactions were performed with rigorous exclusion of air and moisture. *N*-protected amines were prepared according to a literature procedure, and all analytical data matched that report.<sup>1</sup> Anhydrous PhH (99%, Energy Chemical, extra dry, with molecular sieves, Water $\leq$ 50 ppm (by K.F.), EnergySeal). Anhydrous *i*-PrOAc (99.5%, Energy Chemical, extra dry, with molecular sieves, Water $\leq$ 50 ppm (by K.F.), EnergySeal). NiCl<sub>2</sub>·glyme (97%, Strem), NiBr<sub>2</sub>·glyme (97%, Strem), NH<sub>4</sub>Cl (99.999%, Alfa Aesar), Na<sub>2</sub>HPO<sub>4</sub> (>99.0%, Sigma-Aldrich), K<sub>2</sub>HPO<sub>4</sub> (>99.95%, Sigma-Aldrich), NaHCO<sub>3</sub> (>99.7%, Sigma-Aldrich), 2,6-lutidine (98%, Alfa Aesar), and DMDC (Rhawn), and all commercially available carboxylic acids (Alfa Aesar, Energy Chemical, TCI, and Sigma-Aldrich) were used as received.

NMR spectra were collected on a Bruker 400 MHz, a Bruker 500 MHz, or a Varian 500 MHz spectrometer at ambient temperature. HPLC analyses were carried out on an Agilent 1260 series system with Daicel CHIRALPAK® or Daicel CHIRALCEL® columns (4.6 × 250 mm, particle size 3  $\mu$ m). FT-IR measurements were carried out on a Nicolet AVATER FTIR330 spectrometer. High resolution mass spectra (ESI) were recorded by the instrumentation center of Department of Chemistry, Xiamen University, on a high-resolution LC/MS instrument. Emission intensities were recorded on a Hitachi F7000 fluorescence spectrophotometer in a 10.0 mm quartz cuvette. Optical rotation data were obtained with an Anton Paar MCP 500 polarimeter at 589 nm and at 25 °C, using a 50 mm path-length cell in the solvent and at the concentration indicated. GC analyses were obtained on an Agilent 6890A GC. Flash column chromatography was performed using silica gel (200–300 mesh). Blue LED lamps (40 W; Kessil PR160L) were used to irradiate the reaction mixtures.

## 1.2 Preparation of Chiral Ligand (*S, R*)-L1

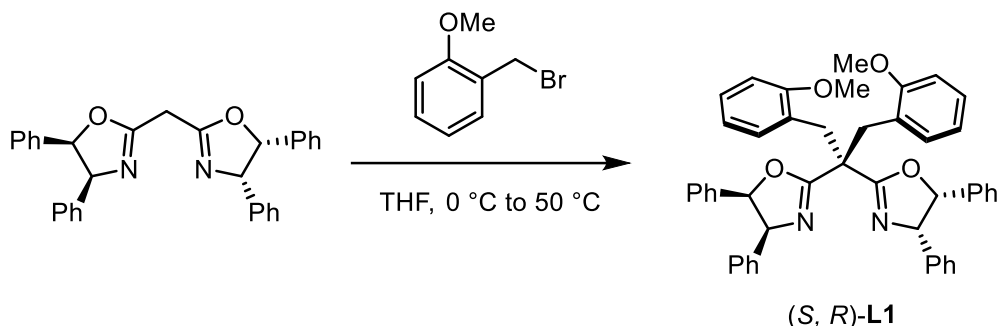

To a solution of bis((4*S*,5*R*)-4,5-diphenyl-4,5-dihydrooxazol-2-yl)methane (2.29 g, 5.0 mmol, 1.0 equiv) in THF (50 mL) was added NaH (60% in oil) (0.60 g, 15.0 mmol, 3.0 equiv) slowly in portions at 0 °C in a 250 mL of round bottom flask. The mixture was stirred at 0 °C for 0.5 h under N<sub>2</sub> atmosphere. Next, the 1-(bromomethyl)-2-methoxybenzene (3.02 g, 15.0 mmol, 3.0 equiv), dissolved in dry THF (10 mL), was added dropwise to the flask, and the mixture was stirred at 50 °C for another 12 h. Then, saturated brine was added carefully to quench the reaction. The solvent was evaporated under reduced pressure and the residue was further extracted with dichloromethane. The combined organic layer was dried over Na<sub>2</sub>SO<sub>4</sub>, filtered, and concentrated under vacuum. The residue was purified by flash column chromatography on silica gel (1:5 EtOAc/ Petroleum ether) to yield (*S, R*)-L1 as a white solid (3.29 g, 94% yield).

<sup>1</sup>H NMR (500 MHz, CDCl<sub>3</sub>) δ 7.64 (d, *J* = 7.5 Hz, 2H), 7.30 – 7.24 (m, 2H), 7.01 – 6.86 (m, 24H), 5.65 (dd, *J* = 10.0, 3.0 Hz, 2H), 5.43 (dd, *J* = 10.0, 3.0 Hz, 2H), 3.94 – 3.78 (m, 10H). <sup>13</sup>C NMR (126 MHz, CDCl<sub>3</sub>) δ 168.62, 158.44, 137.63, 136.10, 132.17, 128.14, 127.85, 127.41, 127.38, 127.10, 126.90, 126.72, 126.30, 120.08, 110.29, 86.03, 73.73, 55.36, 48.92, 34.19.

FT-IR (film): 2934, 2835, 1652, 1494, 1245, 1117, 1027, 754 cm<sup>-1</sup>.

HRMS (ESI-MS) *m/z* [M+H]<sup>+</sup> calcd for C<sub>47</sub>H<sub>43</sub>N<sub>2</sub>O<sub>4</sub>: 699.3217, found: 699.3212.

[α]<sub>D</sub><sup>25</sup> = –333.4 (*c* 1.0, CH<sub>2</sub>Cl<sub>2</sub>).

### 1.3 Optimization of Reaction Conditions

**General Procedure A (GP-A):** In a glovebox, Ir[dF(CF<sub>3</sub>)ppy]<sub>2</sub>(dtbbpy)PF<sub>6</sub> (1.1 mg, 0.001 mmol, 1 mol%), NiCl<sub>2</sub>·glyme (2.2 mg, 0.010 mmol, 10 mol%), (*S, R*)-**L1** (9.1 mg, 0.013 mmol, 13 mol%), (4'-hexyl-[1,1'-biphenyl]-4-yl)(pyrrolidin-1-yl)methanone (**1**) (100.6 mg, 0.30 mmol, 3.0 equiv), a Teflon stir bar, and anhydrous benzene (1.0 mL) were added sequentially to a 4-mL vial. The vial was sealed with a septum cap and wrapped with electrical tape. The reaction mixture was stirred at room temperature for 30 min, after which it turned to a pale-yellow solution. Next, a solution of the 4-methoxy-4-oxobutanoic acid (**2**) (100 μL, 13.2 mg, 0.10 mmol, 1.0 equiv) was added via a 100-μL microsyringe. Then, 2,6-lutidine (17.5 μL, 0.15 mmol, 1.5 equiv) and DMDC (16.0 μL, 0.15 mmol, 1.5 equiv) were added sequentially via microsyringe. Next, the vial was transferred out of the glovebox, and then vacuum grease was liberally applied to cover the entire top of septum cap. Then, the reaction mixture was stirred at 20 °C in an EtOH bath for 1 min before being irradiated with a 40 W the blue LED lamp (Kessil PR160L, 427 nm). The reaction was stirred under blue LED irradiation at 20 °C for 24 hours. Next, the lamp was turned off and then tetradecane (26.0 μL, 0.10 mmol) was added as an internal standard. The mixture was filtered through a small plug of silica gel, which was flushed with acetone (~6 mL). A portion of the filtrate (0.1 mL) was diluted with acetone (total volume: 1 mL) and analyzed via GC, and the remainder of the filtrate was concentrated via rotary evaporation, and the pure product was isolated by preparative TLC on silica gel (1:6 Acetone/petroleum ether).

The results for the optimization of the reaction conditions were revealed in Table 1 and Table S1-S7. **GP-A** was followed, using the corresponding carboxylic acid (0.10 mmol) and saturated *N*-heterocycle (0.30 mmol). The yield and regioselective ratios were determined via GC analysis with tetradecane as an internal standard. The ee values were determined via HPLC analysis after purification by preparative thin-layer chromatography.

Note: Although the reaction is not highly sensitive to oxygen and can be performed under air in a capped 4-mL vial (as show below), to ensure the reproducible results, the coupling is recommended to set up using a glovebox, as described above.

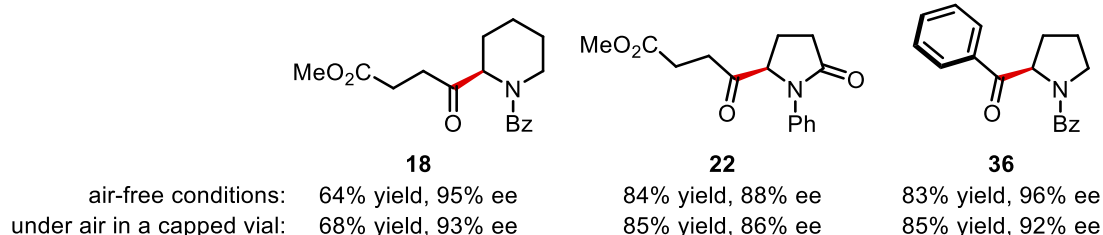

**Supplementary Table 1. Effect of ligand for the  $\alpha$ -acylation of *N*-Bz-piperidine.**

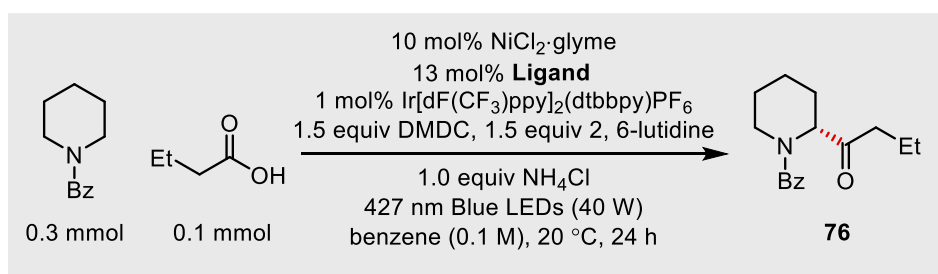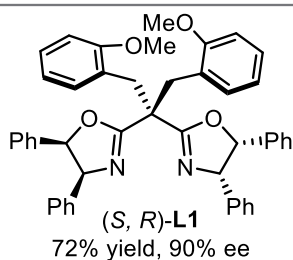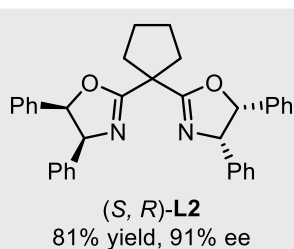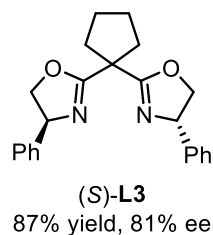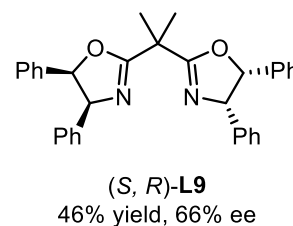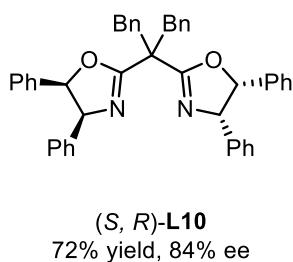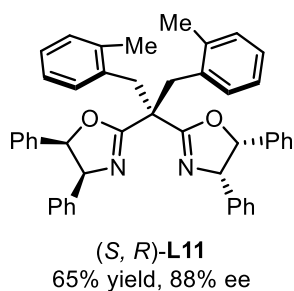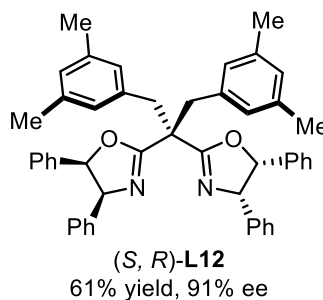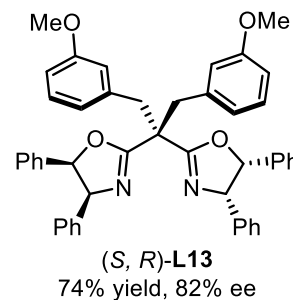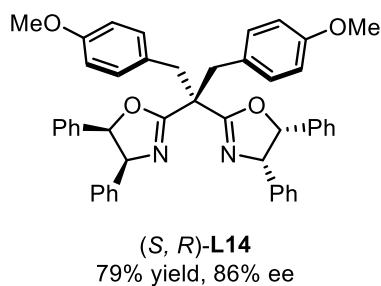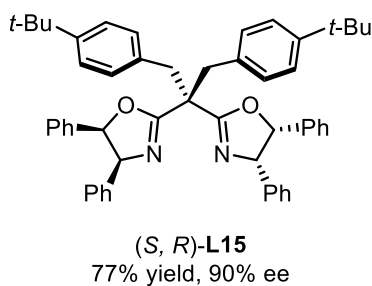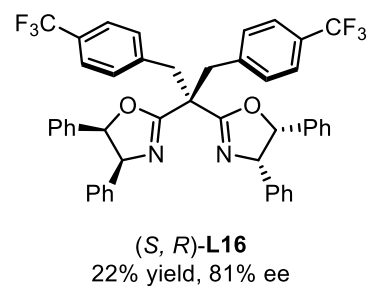

The yield was determined by GC analysis with tetradecane as internal standard. The ee value was determined by HPLC analysis.

**Supplementary Table 2. Effect of base.**

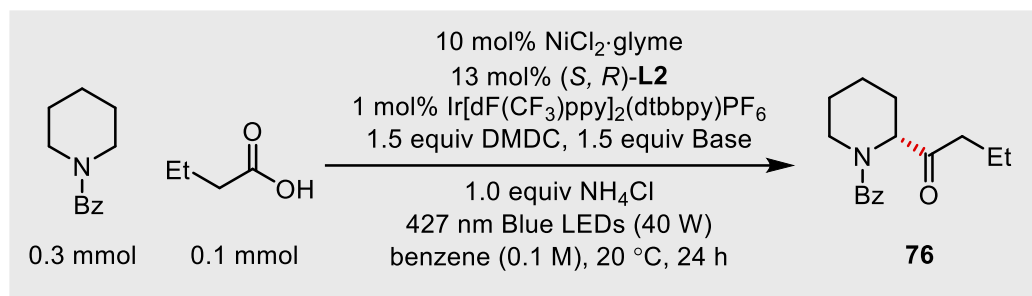

| entry | Base                             | yield (%) | ee (%) |
|-------|----------------------------------|-----------|--------|
| 1     | 2,6-lutidine                     | 82        | 90     |
| 2     | Na <sub>3</sub> PO <sub>4</sub>  | 68        | 64     |
| 3     | Na <sub>2</sub> HPO <sub>4</sub> | 90        | 79     |
| 4     | K <sub>3</sub> PO <sub>4</sub>   | 3         | -      |
| 5     | K <sub>2</sub> HPO <sub>4</sub>  | 89        | 70     |
| 6     | Na <sub>2</sub> CO <sub>3</sub>  | 40        | 70     |
| 7     | NaHCO <sub>3</sub>               | 89        | 69     |
| 8     | K <sub>2</sub> CO <sub>3</sub>   | 81        | 65     |
| 9     | KHCO <sub>3</sub>                | 0         | -      |

The yield was determined by GC analysis with tetradecane as internal standard. The ee value was determined by HPLC analysis.

**Supplementary Table 3. Effect of solvent.**

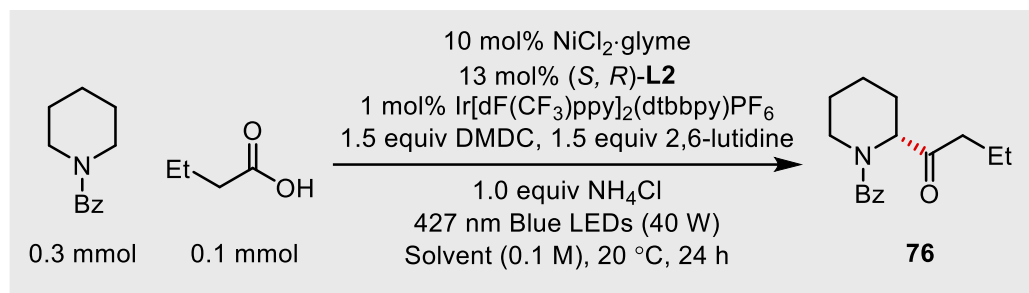

| entry | Solvent           | yield (%) | ee (%) |
|-------|-------------------|-----------|--------|
| 1     | Benzene           | 82        | 90     |
| 2     | MeOAc             | 37        | 82     |
| 3     | EtOAc             | 61        | 84     |
| 4     | <i>i</i> PrOAc    | 76        | 87     |
| 5     | <i>t</i> BuOAc    | 21        | -      |
| 6     | MTBE              | 66        | 74     |
| 7     | CPME              | 10        | -      |
| 8     | PhCF <sub>3</sub> | 21        | 89     |

The yield was determined by GC analysis with tetradecane as internal standard. The ee value was determined by HPLC analysis.

**Supplementary Table 4. Effect of ligand for the  $\alpha$ -acylation of *N*-Bz-pyrrolidine.**

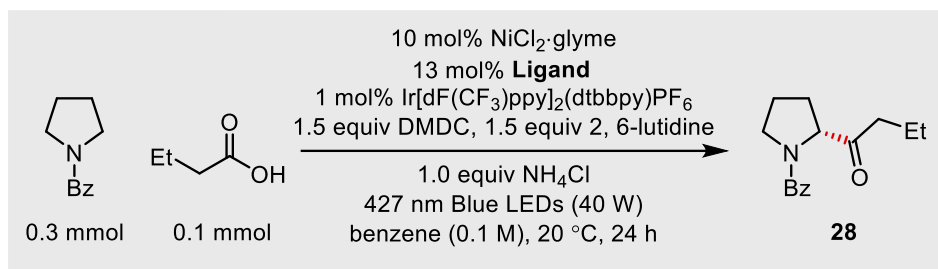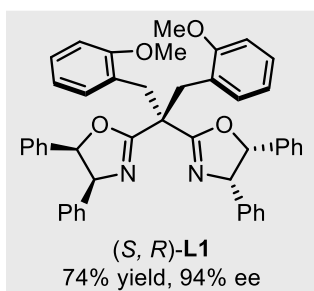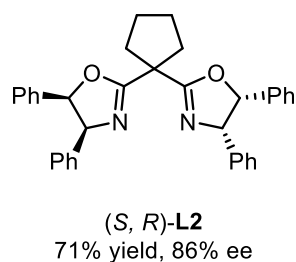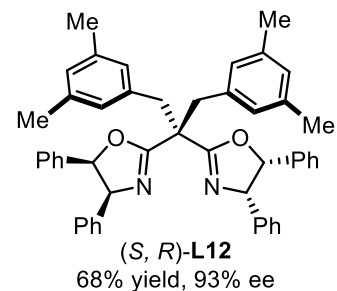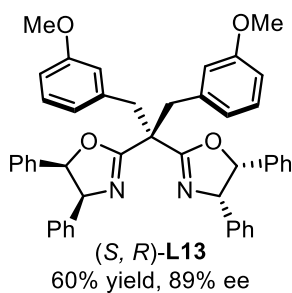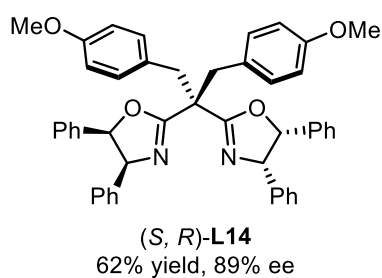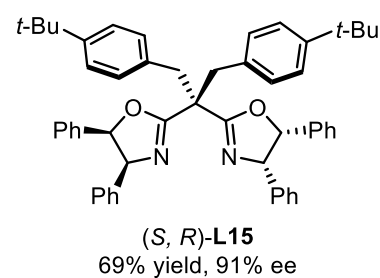

The yield was determined by GC analysis with tetradecane as internal standard. The ee value was determined by HPLC analysis.

Supplementary Table 5. Effect of additive.

| <div> <div> </div> <div> <p>10 mol% NiCl<sub>2</sub>·glyme<br/>13 mol% (S, R)-L1<br/>1 mol% Ir[dF(CF<sub>3</sub>)ppy]<sub>2</sub>(dtbbpy)PF<sub>6</sub><br/>1.5 equiv DMDC, 1.5 equiv 2,6-lutidine<br/>427 nm Blue LEDs (40 W)<br/>1.0 equiv additive<br/>Solvent (0.1 M), 20 °C, 24 h</p> </div> </div> |          |                    |           |
|----------------------------------------------------------------------------------------------------------------------------------------------------------------------------------------------------------------------------------------------------------------------------------------------------------|----------|--------------------|-----------|
| entry                                                                                                                                                                                                                                                                                                    | additive | additive remaining | yield, ee |
| 1                                                                                                                                                                                                                                                                                                        | none     | NA                 | 79, 97    |
| 2                                                                                                                                                                                                                                                                                                        |          | 81                 | 74, 96    |
| 3                                                                                                                                                                                                                                                                                                        |          | 87                 | 70, 96    |
| 4                                                                                                                                                                                                                                                                                                        |          | 87                 | 78, 94    |
| 5                                                                                                                                                                                                                                                                                                        |          | 99                 | 73, 94    |
| 6                                                                                                                                                                                                                                                                                                        |          | 93                 | 80, 95    |
| 7                                                                                                                                                                                                                                                                                                        |          | 90                 | 77, 95    |
| 8                                                                                                                                                                                                                                                                                                        |          | 90                 | 77, 94    |
| 9                                                                                                                                                                                                                                                                                                        |          | 90                 | 78, 95    |
| 10                                                                                                                                                                                                                                                                                                       |          | 93                 | 79, 94    |
| 11                                                                                                                                                                                                                                                                                                       |          | 82                 | 75, 95    |
| 12                                                                                                                                                                                                                                                                                                       |          | 100                | 83, 95    |
| 13                                                                                                                                                                                                                                                                                                       |          | 99                 | 80, 95    |
| 14                                                                                                                                                                                                                                                                                                       |          | 92                 | 78, 95    |

The additive remaining and yield were determined by GC analysis with tetradecane as internal standard. The ee value was determined by HPLC analysis.

## Supplementary Table 6. Effect of HAT catalysts.

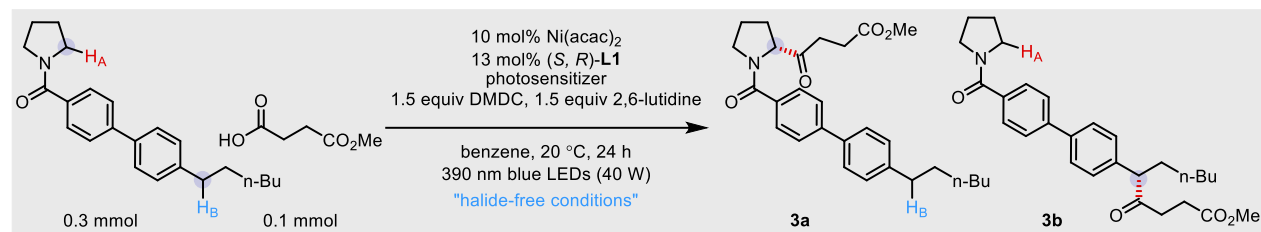

| entry | photosensitizer                                                                                | yield (%)      | r.r. (3a/3b) | ee of 3a (%)   |
|-------|------------------------------------------------------------------------------------------------|----------------|--------------|----------------|
| 1     | 1 mol% Ir[dF(CF <sub>3</sub> )ppy] <sub>2</sub> (dtbbpy)PF <sub>6</sub>                        | 4              | -            | -              |
| 2     | 1 mol% Ir[dF(CF <sub>3</sub> )ppy] <sub>2</sub> (dtbbpy)PF <sub>6</sub> , 25 mol% DMBP         | 4              | -            | -              |
| 3     | 1 mol% Ir[dF(CF <sub>3</sub> )ppy] <sub>2</sub> (dtbbpy)PF <sub>6</sub> , 25 mol% quinuclidine | 0              | -            | -              |
| 4     | 5 mol% TBATD                                                                                   | 0              | -            | -              |
| 5     | 25 mol% <b>H2-H9</b> (as shown below)                                                          | as shown below | -            | as shown below |

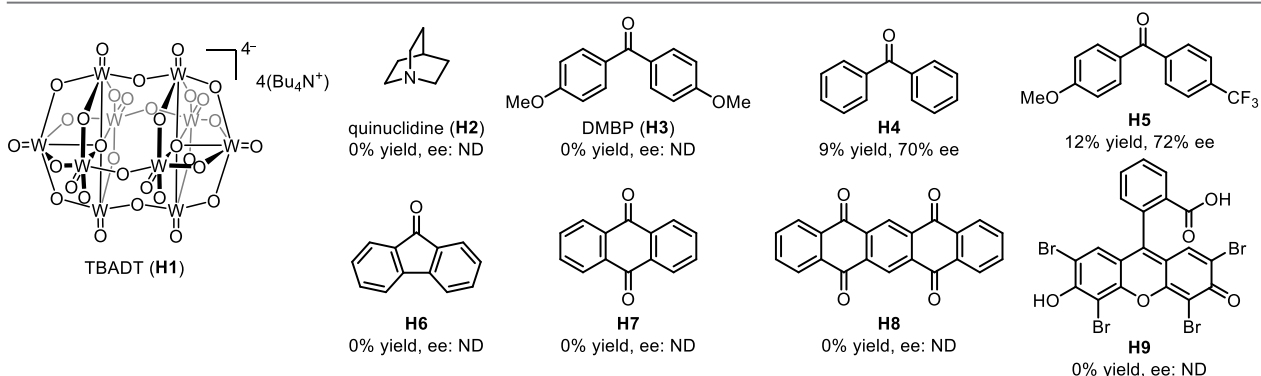

The yield and regioselective ratios were determined by GC analysis with tetradecane as internal standard. The ee value was determined by HPLC analysis.

## Supplementary Table 7. Effect of acyl surrogates.

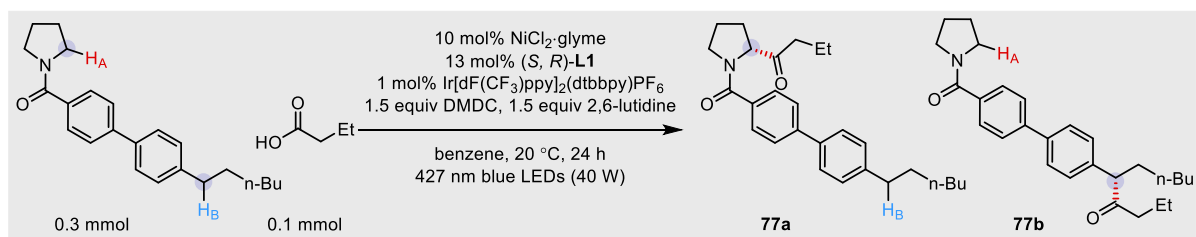

| entry | variation from standard conditions | yield (%) | r.r. (77a/77b) | ee of 77a (%) |
|-------|------------------------------------|-----------|----------------|---------------|
| 1     | none                               | 56        | > 20:1         | 87            |
| 2     | <b>C1</b> , instead of (acid+DMDC) | 50        | > 20:1         | 87            |
| 3     | <b>C2</b> , instead of (acid+DMDC) | 60        | > 20:1         | 82            |
| 4     | <b>C3</b> , instead of (acid+DMDC) | 6         | > 20:1         | 84            |

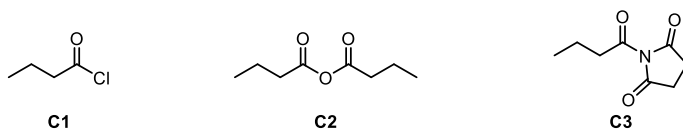

The yield and regioselective ratios were determined by GC analysis with tetradecane as internal standard. The ee value was determined by HPLC analysis.

## 1.4 Catalytic Enantioselective $\alpha$ -Acylation of Saturated Azacycles

**General Procedure B (GP-B): Catalytic enantioselective  $\alpha$ -acylation of saturated azacycles with carboxylic acids.** In a glovebox, Ir[dF(CF<sub>3</sub>)ppy]<sub>2</sub>(dtbbpy)PF<sub>6</sub> (2.2 mg, 0.002 mmol, 1 mol%), NiCl<sub>2</sub>·glyme (4.4 mg, 0.020 mmol, 10 mol%), (*S, R*)-L1 (18.2 mg, 0.026 mmol, 13 mol%), *N*-heterocycle (0.60 mmol, 3.0 equiv), a Teflon stir bar, and anhydrous benzene (2.0 mL) was sequentially added to a 15-mL vial. The reaction mixture was stirred at room temperature for 30 min, after which it turned to a pale-yellow suspension (if the carboxylic acid was a solid, it was added as a solid directly at this point). Next, the vial was closed with a PTFE septum cap and wrapped with electrical tape. Then, carboxylic acids (0.20 mmol, 1.0 equiv), 2,6-lutidine (35.0  $\mu$ L, 0.30 mmol, 1.5 equiv) and DMDC (32.2  $\mu$ L, 0.30 mmol, 1.5 equiv) were added sequentially via microsyringe. Next, the vial was transferred out of the glovebox, and then vacuum grease was liberally applied to cover the entire top of the septum cap. Then, the reaction mixture was stirred at 20 °C in an EtOH bath for 1 min before being irradiated with a 40 W the blue LED lamp (Kessil PR160L, 427 nm). The reaction was stirred under blue LED irradiation at 20 °C for 24 hours. The reaction mixture was then passed through a short pad of silica gel, with acetone as the eluent (~20 mL). The resulting mixture was concentrated, and the residue was purified by flash chromatography on silica gel or preparative thin-layer chromatography on silica gel.

For compounds **5**, **12**, **18**, **22**, **36–41**, **60**, **67** and **68**, in place of the standard conditions, (*S, R*)-L2 (13 mol%) were used. For compounds **23–26**, in place of the standard conditions, C–H nucleophile (4.0 equiv), (*S, R*)-L2 (13 mol%, for **23**) or (*R, S*)-L2 (13 mol%, for **24–26**) were used. For compounds **11**, **63–66**, **69** and **70**, in place of the standard conditions, the reactions were run in the absence of 2,6-lutidine.

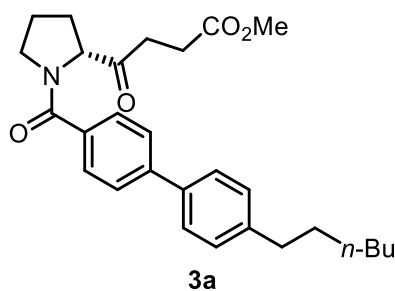

**Methyl (R)-4-(1-(4'-hexyl-[1,1'-biphenyl]-4-carbonyl)pyrrolidin-2-yl)-4-oxobutanoate (3a**, from (*S, R*)-**L1**). The title compound was synthesized according to **GP-B** from 4-methoxy-4-oxobutanoic acid and (4'-hexyl-[1,1'-biphenyl]-4-yl)(pyrrolidin-1-yl)methanone. The product was purified by preparative TLC on silica gel (1:6 Acetone/Petroleum ether). Yellow oil.

(*S, R*)-**L1**: 57.8 mg, 64% yield, 95% ee, 28:1 rr;

(*R, S*)-**L1**: 55.8 mg, 62% yield, 94% ee, 28:1 rr.

HPLC analysis: The ee was determined via HPLC on a CHIRALCEL OD-3 column (15.0% 2-PrOH in hexanes, 1.0 mL/min); retention times for compound obtained using (*S, R*)-**L1**: 12.2 min (major), 14.1 min (minor).

<sup>1</sup>H NMR (500 MHz, CDCl<sub>3</sub>) (81:19 mixture of rotamers) δ 7.68 – 7.55 (m, 4.00H), 7.53 – 7.47 (m, 2.00H), 7.28 – 7.24 (m, 2.00H), 4.78 (dd, *J* = 8.4, 5.8 Hz, 0.81H), 3.84 – 3.56 (m, 5.38H), 3.03 – 2.87 (m, 1.81H), 2.79 – 2.70 (m, 1.00H), 2.68 – 2.57 (m, 3.00H), 2.32 – 2.22 (m, 1.00H), 2.07 – 1.97 (m, 2.00H), 1.92 – 1.83 (m, 1.00H), 1.67 – 1.60 (m, 2.00H), 1.39 – 1.28 (m, 6.00H), 0.92 – 0.85 (m, 3.00H). <sup>13</sup>C NMR (126 MHz, CDCl<sub>3</sub>) major isomer δ 206.99, 173.25, 169.43, 143.03, 142.73, 137.37, 134.29, 128.86, 127.79, 126.88, 126.61, 64.90, 51.64, 50.29, 35.52, 34.39, 31.63, 31.31, 28.91, 28.15, 27.30, 25.42, 22.51, 13.99.

FT-IR (film): 3447, 2927, 1729, 1625, 1412, 1209, 767 cm<sup>-1</sup>.

HRMS (ESI-MS) *m/z* [M+H]<sup>+</sup> calcd for C<sub>28</sub>H<sub>36</sub>NO<sub>4</sub>: 450.2639, found: 450.2637.

[α]<sub>D</sub><sup>25</sup> = +37.2 (*c* 1.0, CH<sub>2</sub>Cl<sub>2</sub>); 95% ee from (*S, R*)-**L1**.

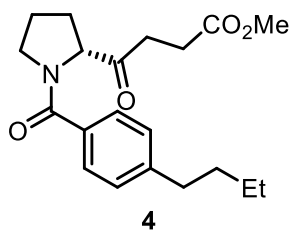

**Methyl (R)-4-(1-(4-butylbenzoyl)pyrrolidin-2-yl)-4-oxobutanoate (4**, from (*S, R*)-**L1**). The title compound was synthesized according to **GP-B** from 4-methoxy-4-oxobutanoic acid and (4-butylphenyl)(pyrrolidin-1-yl)methanone. The product was purified by preparative TLC on silica gel (1:4 Acetone/Petroleum ether). Yellow oil.

(*S, R*)-**L1**: 47.3 mg, 68% yield, 96% ee, >20:1 rr;

(*R, S*)-**L1**: 47.2 mg, 68% yield, 95% ee, >20:1 rr.

HPLC analysis: The ee was determined via HPLC on a CHIRALCEL OD-3 column (15.0% 2-PrOH in hexanes, 1.0 mL/min); retention times for compound obtained using (*S, R*)-**L1**: 9.9 min (major), 13.4 min (minor).

<sup>1</sup>H NMR (400 MHz, CD<sub>2</sub>Cl<sub>2</sub>) (87:13 mixture of rotamers) δ 7.51 – 7.41 (m, 1.74H), 7.24 (d, *J* = 8.0 Hz, 1.74H), 7.18 (s, 0.52H), 4.77 – 4.59 (m, 0.87H), 4.50 (d, *J* = 8.8 Hz, 0.13H), 3.73 – 3.53 (m,

5.13H), 3.01 – 2.76 (m, 1.87H), 2.71 – 2.54 (m, 4.00H), 2.30 – 2.20 (m, 1.00H), 1.99 – 1.92 (m, 2.00H), 1.91 – 1.82 (m, 1.00H), 1.66 – 1.56 (m, 2.00H), 1.42 – 1.31 (m, 2.00H), 0.93 (t,  $J = 7.3$  Hz, 3.00H).  $^{13}\text{C}$  NMR (126 MHz,  $\text{CD}_2\text{Cl}_2$ ) major isomer  $\delta$  207.66, 173.51, 169.92, 145.95, 133.91, 128.59, 127.68, 65.58, 51.95, 50.79, 35.85, 34.40, 33.83, 28.71, 27.76, 25.90, 22.71, 14.07.

FT-IR (film): 2955, 2930, 1735, 1625, 1420, 1207, 760  $\text{cm}^{-1}$ .

HRMS (ESI-MS)  $m/z$   $[\text{M}+\text{H}]^+$  calcd for  $\text{C}_{20}\text{H}_{28}\text{NO}_4$ : 346.2013, found: 346.2010.

$[\alpha]_{\text{D}}^{25} = +55.0$  ( $c$  1.0,  $\text{CH}_2\text{Cl}_2$ ); 96% ee from (*S*, *R*)-**L1**.

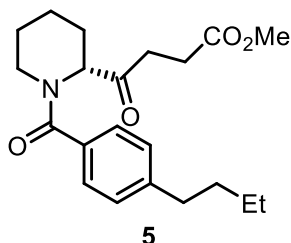

**Methyl (*R*)-4-(1-(4-butylbenzoyl)piperidin-2-yl)-4-oxobutanoate (5, from (*S*, *R*)-**L2**).** The title compound was synthesized according to **GP-B** from 4-methoxy-4-oxobutanoic acid and (4-butylphenyl)(piperidin-1-yl)methanone. The product was purified by preparative TLC on silica gel (1:4 Acetone/Petroleum ether). Colorless oil.

(*S*, *R*)-**L2**: 43.2 mg, 60% yield, 94% ee, >20:1 rr;

(*R*, *S*)-**L2**: 43.3 mg, 60% yield, 93% ee, >20:1 rr.

HPLC analysis: The ee was determined via HPLC on a CHIRALCEL OD-3 column (10.0% 2-PrOH in hexanes, 1.0 mL/min); retention times for compound obtained using (*S*, *R*)-**L2**: 9.6 min (major), 11.3 min (minor).

$^1\text{H}$  NMR (400 MHz,  $\text{CD}_2\text{Cl}_2$ ) (66:34 mixture of rotamers)  $\delta$  7.34 (d,  $J = 7.8$  Hz, 1.66H), 7.29 – 7.19 (m, 2.34H), 5.31 – 5.23 (m, 0.66H), 4.64 – 4.33 (m, 0.34H), 3.76 – 3.59 (m, 3.66H), 3.18 – 3.09 (m, 0.68H), 2.99 – 2.75 (m, 2.00H), 2.74 – 2.45 (m, 4.66H), 2.41 – 2.20 (m, 1.00H), 1.90 (brs, 0.66H), 1.78 – 1.68 (m, 2.00H), 1.66 – 1.57 (m, 2.34H), 1.51 – 1.33 (m, 4.00H), 0.94 (t,  $J = 7.4$  Hz, 3.00H).  $^{13}\text{C}$  NMR (126 MHz,  $\text{CD}_2\text{Cl}_2$ ) major isomer  $\delta$  207.56, 173.43, 171.78, 145.30, 133.62, 128.79, 127.30, 59.17, 52.00, 46.70, 35.84, 34.30, 33.88, 27.94, 26.03, 25.53, 22.72, 21.30, 14.08

FT-IR (film): 2931, 2858, 1740, 1633, 1421, 1276, 999, 760  $\text{cm}^{-1}$ .

HRMS (ESI-MS)  $m/z$   $[\text{M}+\text{H}]^+$  calcd for  $\text{C}_{21}\text{H}_{30}\text{NO}_4$ : 360.2169, found: 360.2166.

$[\alpha]_{\text{D}}^{25} = +74.7$  ( $c$  1.0,  $\text{CH}_2\text{Cl}_2$ ); 94% ee from (*S*, *R*)-**L2**.

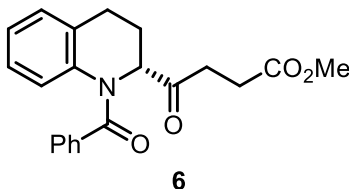

**Methyl (R)-4-(1-benzoyl-1,2,3,4-tetrahydroquinolin-2-yl)-4-oxobutanoate (6**, from (*S*, *R*)-**L1**). The title compound was synthesized according to **GP-B** from 4-methoxy-4-oxobutanoic acid and (3,4-dihydroquinolin-1(2*H*)-yl)(phenyl)methanone. The product was purified by preparative TLC on silica gel (1:3 EtOAc/Petroleum ether). Yellow oil.

(*S*, *R*)-**L1**: 59.6 mg, 88% yield, 92% ee, >20:1 rr;

(*R*, *S*)-**L1**: 55.5 mg, 82% yield, 90% ee, >20:1 rr.

HPLC analysis: The ee was determined via HPLC on a CHIRALCEL OD-3 column (15.0% 2-PrOH in hexanes, 1.0 mL/min); retention times for compound obtained using (*S*, *R*)-**L1**: 16.7 min (major), 22.6 min (minor).

<sup>1</sup>H NMR (400 MHz, CDCl<sub>3</sub>) δ 7.37 – 7.28 (m, 3H), 7.22 (t, *J* = 7.5 Hz, 2H), 7.14 (d, *J* = 7.5 Hz, 1H), 6.98 (t, *J* = 7.5 Hz, 1H), 6.84 (td, *J* = 7.6, 1.5 Hz, 1H), 6.56 (d, *J* = 8.0 Hz, 1H), 5.09 (t, *J* = 8.5 Hz, 1H), 3.62 (s, 3H), 3.03 – 2.91 (m, 1H), 2.89 – 2.78 (m, 2H), 2.78 – 2.63 (m, 2H), 2.61 – 2.50 (m, 2H), 1.93 – 1.82 (m, 1H). <sup>13</sup>C NMR (101 MHz, CDCl<sub>3</sub>) δ 206.69, 173.08, 170.41, 138.41, 134.96, 132.72, 130.55, 128.92, 127.97, 127.45, 126.39, 125.83, 124.85, 62.64, 51.66, 33.85, 27.52, 27.26, 26.17.

FT-IR (film): 3448, 2952, 1728, 1639, 1490, 1350, 1208, 724 cm<sup>-1</sup>.

HRMS (ESI-MS) *m/z* [M+H]<sup>+</sup> calcd for C<sub>21</sub>H<sub>22</sub>NO<sub>4</sub>: 352.1543, found: 352.1539.

[α]<sub>D</sub><sup>25</sup> = +176.3 (*c* 1.0, CH<sub>2</sub>Cl<sub>2</sub>); 92% ee from (*S*, *R*)-**L1**.

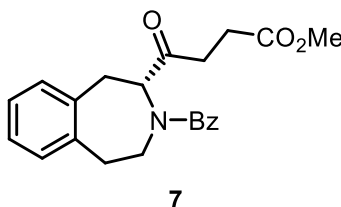

**Methyl (R)-4-(3-benzoyl-2,3,4,5-tetrahydro-1H-benzo[d]azepin-2-yl)-4-oxobutanoate (7**, from (*S*, *R*)-**L1**). The title compound was synthesized according to **GP-B** from methyl 4-methoxy-4-oxobutanoic acid and phenyl(1,2,4,5-tetrahydro-3*H*-benzo[d]azepin-3-yl)methanone. The product was purified by preparative TLC on silica gel (1:4 Acetone/Petroleum ether). Yellow oil.

(*S*, *R*)-**L1**: 33.7 mg, 46% yield, 81% ee, >20:1 rr;

(*R*, *S*)-**L1**: 32.7 mg, 45% yield, 78% ee, >20:1 rr.

HPLC analysis: The ee was determined via HPLC on a CHIRALCEL OD-3 column (25.0% 2-PrOH in hexanes, 0.8 mL/min); retention times for compound obtained using (*S*, *R*)-**L1**: 11.4 min (major), 14.6 min (minor).

<sup>1</sup>H NMR (500 MHz, CDCl<sub>3</sub>) (81:19 mixture of rotamers) δ 7.49 – 7.27 (m, 4.62H), 7.26 – 7.16 (m, 3.00H), 7.12 – 7.06 (m, 1.00H), 6.96 (d, *J* = 7.4 Hz, 0.38H), 5.37 (dd, *J* = 9.4, 4.7 Hz, 0.81H), 4.86 – 4.75 (m, 0.19H), 4.53 (dd, *J* = 8.9, 5.0 Hz, 0.19H), 3.86 – 3.79 (m, 0.81H), 3.70 – 3.63 (m, 3.00H), 3.62 – 3.54 (m, 0.81H), 3.46 – 3.38 (m, 0.81H), 3.33 – 3.28 (m, 0.19H), 3.28 – 3.20 (m, 0.81H), 3.20 – 3.09 (m, 0.38H), 3.09 – 3.02 (m, 0.38H), 3.00 – 2.85 (m, 3.00H), 2.84 – 2.44 (m,

2.62H).  $^{13}\text{C}$  NMR (126 MHz,  $\text{CDCl}_3$ ) major isomer  $\delta$  205.96, 173.07, 172.49, 138.10, 136.37, 135.89, 130.21, 129.67, 129.52, 128.46, 127.26, 127.02, 126.61, 61.54, 51.77, 45.12, 35.08, 34.67, 34.55, 27.56.  
 FT-IR (film): 3449, 2921, 2850, 1721, 1632, 1421, 1208, 751  $\text{cm}^{-1}$ .  
 HRMS (ESI-MS)  $m/z$   $[\text{M}+\text{H}]^+$  calcd for  $\text{C}_{22}\text{H}_{24}\text{NO}_4$ : 366.1700, found: 366.1697.  
 $[\alpha]^{25}_{\text{D}} = +41.5$  ( $c$  1.0,  $\text{CH}_2\text{Cl}_2$ ); 81% ee from (*S*, *R*)-**L1**.

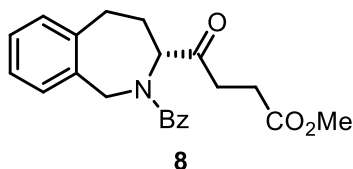

**Methyl (*R*)-4-(2-benzoyl-2,3,4,5-tetrahydro-1*H*-benzo[*c*]azepin-3-yl)-4-oxobutanoate (8, from (*S*, *R*)-**L1**).** The title compound was synthesized according to **GP-B** from 4-methoxy-4-oxobutanoic acid and phenyl(1,3,4,5-tetrahydro-2*H*-benzo[*c*]azepin-2-yl)methanone. The product was purified by preparative TLC on silica gel (1:5 Acetone/Petroleum ether). Yellow oil.

(*S*, *R*)-**L1**: 32.2 mg, 44% yield, 84% ee, 16:1 rr;

(*R*, *S*)-**L1**: 32.3 mg, 44% yield, 83% ee, 16:1 rr.

HPLC analysis: The ee was determined via HPLC on a CHIRALPAK AD-3 column (20.0% 2-PrOH in hexanes, 1.0 mL/min); retention times for compound obtained using (*S*, *R*)-**L1**: 9.3 min (major), 18.9 min (minor).

$^1\text{H}$  NMR (500 MHz,  $\text{CDCl}_3$ ) (78:22 mixture of rotamers)  $\delta$  7.48 – 7.36 (m, 2.00H), 7.35 – 7.27 (m, 2.00H), 7.25 – 7.22 (m, 1.44H), 7.20 – 7.11 (m, 2.00H), 7.08 – 7.02 (m, 0.78H), 6.56 (d,  $J$  = 7.5 Hz, 0.78H), 5.40 – 5.33 (m, 0.22H), 5.30 (t,  $J$  = 7.5 Hz, 0.78H), 4.68 – 4.59 (m, 0.78H), 4.50 (t,  $J$  = 5.9 Hz, 0.22H), 4.47 – 4.39 (m, 0.78H), 4.25 – 4.14 (m, 0.22H), 3.72 – 3.60 (m, 3.00H), 3.16 – 3.07 (m, 1.00H), 3.05 – 2.91 (m, 2.44H), 2.86 – 2.79 (m, 0.22H), 2.79 – 2.53 (m, 2.56H), 2.46 – 2.34 (m, 1.78H).  $^{13}\text{C}$  NMR (126 MHz,  $\text{CDCl}_3$ ) major isomer  $\delta$  207.09, 173.15, 173.10, 139.58, 136.43, 135.49, 130.13, 130.02, 128.16, 128.11, 127.47, 127.15, 126.10, 63.42, 51.79, 51.22, 34.46, 31.94, 27.49, 26.73.

FT-IR (film): 2922, 1736, 1636, 1413, 1247, 702  $\text{cm}^{-1}$ .

HRMS (ESI-MS)  $m/z$   $[\text{M}+\text{H}]^+$  calcd for  $\text{C}_{22}\text{H}_{24}\text{NO}_4$ : 366.1700, found: 366.1697.

$[\alpha]^{25}_{\text{D}} = +27.0$  ( $c$  1.0,  $\text{CH}_2\text{Cl}_2$ ); 84% ee from (*S*, *R*)-**L1**.

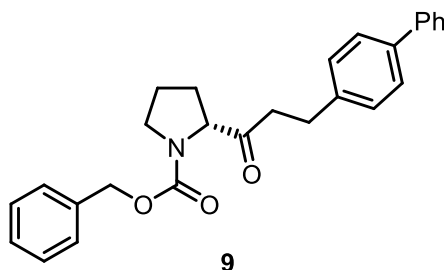

**Benzyl (*R*)-2-(3-([1,1'-biphenyl]-4-yl)propanoyl)pyrrolidine-1-carboxylate (9, from (*S*, *R*)-**L1**).** The title compound was synthesized according to **GP-B** from 3-([1,1'-biphenyl]-4-yl)propanoic acid and benzyl pyrrolidine-1-carboxylate. The product was purified by preparative TLC on silica gel (1:6 Acetone/Petroleum ether). Yellowish-green oil.

(*S, R*)-**L1**: 51.0 mg, 62% yield, 88% ee, >20:1 rr;

(*R, S*)-**L1**: 52.8 mg, 64% yield, 89% ee, >20:1 rr.

HPLC analysis: The ee was determined via HPLC on a CHIRALCEL OD-3 column (15.0% 2-PrOH in hexanes, 1.0 mL/min); retention times for compound obtained using (*S, R*)-**L1**: 17.4 min (minor), 20.3 min (major).

<sup>1</sup>H NMR (500 MHz, CDCl<sub>3</sub>) (51:49 mixture of rotamers) δ 7.60 – 7.56 (m, 2.00H), 7.54 – 7.48 (m, 2.00H), 7.46 – 7.42 (m, 2.00H), 7.40 – 7.26 (m, 7.00H), 7.14 (d, *J* = 7.9 Hz, 1.00H), 5.22 – 5.04 (m, 2.00H), 4.46 (dd, *J* = 8.8, 4.4 Hz, 0.51H), 4.36 (dd, *J* = 8.8, 4.8 Hz, 0.49H), 3.63 – 3.49 (m, 2.00H), 3.02 – 2.96 (m, 1.00H), 2.90 – 2.81 (m, 2.00H), 2.77 – 2.60 (m, 1.00H), 2.20 – 2.05 (m, 1.00H), 1.89 – 1.81 (m, 2.00H), 1.81 – 1.73 (m, 1.00H). <sup>13</sup>C NMR (126 MHz, CDCl<sub>3</sub>) δ 208.63, 208.45, 155.02, 154.26, 140.89, 140.82, 140.21, 139.95, 139.05, 138.98, 136.64, 136.34, 128.73, 128.66, 128.64, 128.45, 128.42, 128.06, 127.92, 127.77, 127.10, 127.08, 127.02, 126.89, 67.12, 67.00, 65.13, 64.93, 47.24, 46.68, 41.06, 40.37, 29.65, 28.97, 28.81, 28.49, 24.27, 23.52.

FT-IR (film): 3448, 1702, 1415, 1356, 1117, 698 cm<sup>-1</sup>.

HRMS (ESI-MS) *m/z* [M+Na]<sup>+</sup> calcd for C<sub>27</sub>H<sub>27</sub>NNaO<sub>3</sub>: 436.1883, found: 436.1881.

[α]<sub>D</sub><sup>25</sup> = +33.7 (*c* 1.0, CH<sub>2</sub>Cl<sub>2</sub>); 88% ee from (*S, R*)-**L1**.

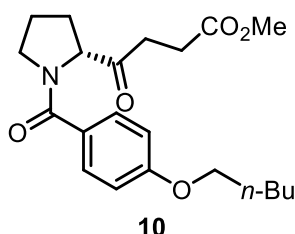

**Methyl (*R*)-4-oxo-4-(1-(4-(pentyloxy)benzoyl)pyrrolidin-2-yl)butanoate (10, from (*S, R*)-**L1**).** The title compound was synthesized according to **GP-B** from 4-methoxy-4-oxobutanoic acid and (4-(pentyloxy)phenyl)(pyrrolidin-1-yl)methanone. The product was purified by preparative TLC on silica gel (1:4 Acetone/Petroleum ether). Yellow oil.

(*S, R*)-**L1**: 48.2 mg, 64% yield, 94% ee, 17:1 rr;

(*R, S*)-**L1**: 49.2 mg, 66% yield, 94% ee, 17:1 rr.

HPLC analysis: The ee was determined via HPLC on a CHIRALCEL OD-3 column (20.0% 2-PrOH in hexanes, 1.0 mL/min); retention times for compound obtained using (*S, R*)-**L1**: 9.6 min (major), 13.6 min (minor).

<sup>1</sup>H NMR (400 MHz, CDCl<sub>3</sub>) (87:13 mixture of rotamers) δ 7.54 (d, *J* = 8.6 Hz, 1.74H), 6.88 (d, *J* = 8.6 Hz, 2.26H), 4.74 (dd, *J* = 7.8, 6.5 Hz, 0.87H), 4.53 (brs, 0.13H), 3.97 (t, *J* = 6.6 Hz, 2.00H), 3.82 – 3.55 (m, 5.00H), 3.01 – 2.52 (m, 3.87H), 2.39 (brs, 0.13H), 2.32 – 2.19 (m, 1.00H), 2.08 – 1.94 (m, 2.00H), 1.92 – 1.83 (m, 1.00H), 1.83 – 1.74 (m, 2.00H), 1.49 – 1.33 (m, 4.00H), 0.97 – 0.85 (m, 3.00H). <sup>13</sup>C NMR (126 MHz, CDCl<sub>3</sub>) major isomer δ 207.19, 173.24, 169.33, 160.75, 129.28, 127.72, 113.89, 68.00, 65.00, 51.60, 50.40, 34.28, 28.73, 28.11, 28.03, 27.27, 25.51, 22.30, 13.87.

FT-IR (film): 2954, 1736, 1608, 1421, 1253, 1174, 843, 765 cm<sup>-1</sup>.

HRMS (ESI-MS) *m/z* [M+H]<sup>+</sup> calcd for C<sub>21</sub>H<sub>30</sub>NO<sub>5</sub>: 376.2118, found: 376.2116.

[α]<sub>D</sub><sup>25</sup> = +47.2 (*c* 1.0, CH<sub>2</sub>Cl<sub>2</sub>); 94% ee from (*S, R*)-**L1**.

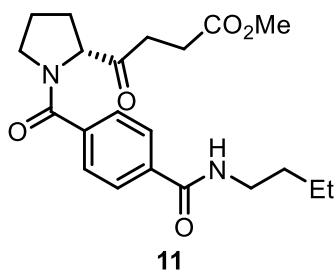

**Methyl (R)-4-(1-(4-(butylcarbamoyl)benzoyl)pyrrolidin-2-yl)-4-oxobutanoate (11**, from (*S*, *R*)-**L1**). The title compound was synthesized according to **GP-B** from 4-methoxy-4-oxobutanoic acid and *N*-butyl-4-(pyrrolidine-1-carbonyl)benzamide. The product was purified by preparative TLC on silica gel (1:1:3 Acetone/DCM/Petroleum ether). White solid.

(*S*, *R*)-**L1**: 41.0 mg, 53% yield, 88% ee, 15:1 rr;

(*R*, *S*)-**L1**: 40.3 mg, 52% yield, 89% ee, 15:1 rr.

HPLC analysis: The ee was determined via HPLC on a CHIRALPAK AD-3 column (20.0% 2-PrOH in hexanes, 1.0 mL/min); retention times for compound obtained using (*S*, *R*)-**L1**: 14.7 min (major), 20.5 min (minor).

<sup>1</sup>H NMR (400 MHz, CD<sub>2</sub>Cl<sub>2</sub>) (87:13 mixture of rotamers) δ 7.85 – 7.66 (m, 2.00H), 7.62 – 7.44 (m, 1.74H), 7.27 (d, *J* = 8.0 Hz, 0.26H), 6.65 (t, *J* = 5.9 Hz, 1.00H), 4.69 (dd, *J* = 8.5, 5.8 Hz, 0.87H), 4.43 (dd, *J* = 9.1, 3.0 Hz, 0.13H), 3.76 – 3.44 (m, 5.13H), 3.39 (td, *J* = 7.2, 5.7 Hz, 2.00H), 2.88 (t, *J* = 6.5 Hz, 1.74H), 2.71 – 2.52 (m, 2.00H), 2.50 – 2.42 (m, 0.13H), 2.32 – 2.20 (m, 1.00H), 2.01 – 1.92 (m, 2.00H), 1.91 – 1.83 (m, 1.00H), 1.64 – 1.51 (m, 2.00H), 1.46 – 1.34 (m, 2.00H), 0.94 (t, *J* = 7.3 Hz, 3.00H). <sup>13</sup>C NMR (126 MHz, CD<sub>2</sub>Cl<sub>2</sub>) δ 207.24, 207.17, 173.43, 169.73, 169.05, 166.87, 166.83, 140.22, 139.14, 137.02, 127.62, 127.45, 127.32, 127.01, 67.38, 65.47, 52.04, 51.97, 50.62, 47.15, 40.19, 34.62, 34.31, 32.08, 30.41, 28.69, 27.75, 27.50, 25.78, 22.80, 20.56, 13.96.

FT-IR (film): 2955, 2930, 1735, 1625, 1420, 1403, 1207, 760 cm<sup>-1</sup>.

HRMS (ESI-MS) *m/z* [M+H]<sup>+</sup> calcd for C<sub>21</sub>H<sub>29</sub>N<sub>2</sub>O<sub>5</sub>: 389.2071, found: 389.2066.

[α]<sub>D</sub><sup>25</sup> = +52.8 (*c* 1.0, CH<sub>2</sub>Cl<sub>2</sub>); 88% ee from (*S*, *R*)-**L1**.

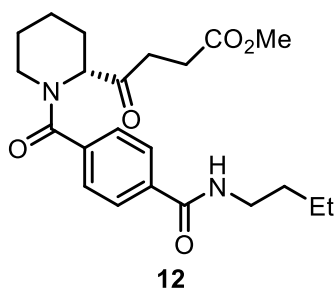

**Methyl (R)-4-(1-(4-(butylcarbamoyl)benzoyl)piperidin-2-yl)-4-oxobutanoate (12**, from (*S*, *R*)-**L2**). The title compound was synthesized according to **GP-B** from 4-methoxy-4-oxobutanoic acid and *N*-butyl-4-(piperidine-1-carbonyl)benzamide. The product was purified by preparative TLC on silica gel (1:1:4 Acetone/EtOAc/Petroleum ether). Colorless oil.

(*S*, *R*)-**L2**: 40.6 mg, 50% yield, 93% ee, 19:1 rr;

(*R*, *S*)-**L2**: 40.7 mg, 51% yield, 92% ee, 19:1 rr.

HPLC analysis: The ee was determined via HPLC on a CHIRALPAK IF column (25.0% 2-PrOH in hexanes, 0.8 mL/min); retention times for compound obtained using (*S*, *R*)-**L2**: 20.2 min (major), 26.5 min (minor).

$^1\text{H}$  NMR (400 MHz,  $\text{CD}_2\text{Cl}_2$ ) (86:14 mixture of rotamers)  $\delta$  7.83 – 7.68 (m, 2.00H), 7.50 – 7.33 (m, 1.72H), 7.31 – 7.26 (m, 0.28H), 7.16 (d,  $J$  = 7.2 Hz, 0.14H), 6.73 – 6.56 (m, 0.86H), 5.32 – 5.27 (m, 0.75H), 4.79 – 4.71 (m, 0.11H), 4.56 (d,  $J$  = 13.2 Hz, 0.14H), 4.24 (brs, 0.14H), 3.72 – 3.49 (m, 4.00H), 3.38 (q,  $J$  = 6.6 Hz, 1.86H), 3.30 – 3.06 (m, 1.00H), 2.90 – 2.77 (m, 1.72H), 2.66 – 2.52 (m, 2.28H), 2.39 – 2.16 (m, 1.00H), 1.99 – 1.90 (m, 1.00H), 1.78 – 1.65 (m, 2.00H), 1.60 – 1.49 (m, 2.72H), 1.39 (p,  $J$  = 7.4 Hz, 3.28H), 0.93 (t,  $J$  = 7.3 Hz, 3.00H).  $^{13}\text{C}$  NMR (126 MHz,  $\text{CD}_2\text{Cl}_2$ )  $\delta$  208.03, 207.16, 173.39, 173.28, 170.93, 169.40, 166.87, 166.82, 140.15, 138.96, 136.55, 135.29, 127.71, 127.64, 127.51, 127.27, 127.24, 126.75, 59.14, 59.00, 52.04, 46.55, 40.44, 40.19, 34.75, 34.30, 33.62, 32.08, 27.96, 27.92, 26.82, 25.87, 25.61, 25.17, 21.35, 21.15, 20.55, 19.07, 14.02, 13.96.

FT-IR (film): 3332, 2954, 1738, 1720, 1635, 1544, 1436, 1278, 859  $\text{cm}^{-1}$ .

HRMS (ESI-MS)  $m/z$   $[\text{M}+\text{H}]^+$  calcd for  $\text{C}_{22}\text{H}_{31}\text{N}_2\text{O}_5$ : 403.2227 found: 403.2224.

$[\alpha]^{25}_{\text{D}} = +51.6$  ( $c$  1.0,  $\text{CH}_2\text{Cl}_2$ ); 93% ee from (*S*, *R*)-**L2**.

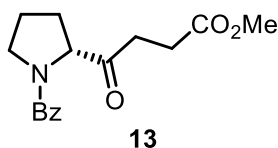

**Methyl (*R*)-4-(1-benzoylpyrrolidin-2-yl)-4-oxobutanoate (13**, from (*S*, *R*)-**L1**). The title compound was synthesized according to **GP-B** from 4-methoxy-4-oxobutanoic acid and *N*-Bz-pyrrolidine. The product was purified by preparative TLC on silica gel (1:4 Acetone/Petroleum ether). Yellow oil.

(*S*, *R*)-**L1**: 41.6 mg, 72% yield, 96% ee; (*R*, *S*)-**L1**: 42.4 mg, 73% yield, 97% ee.

HPLC analysis: The ee was determined via HPLC on a CHIRALCEL OD-3 column (20.0% 2-PrOH in hexanes, 1.0 mL/min); retention times for compound obtained using (*S*, *R*)-**L1**: 11.2 min (major), 14.7 min (minor).

$^1\text{H}$  NMR (400 MHz,  $\text{CDCl}_3$ ) (87:13 mixture of rotamers)  $\delta$  7.56 – 7.50 (m, 1.72H), 7.44 – 7.27 (m, 3.28H), 4.74 (dd,  $J$  = 8.1, 5.8 Hz, 0.87H), 4.44 (dd,  $J$  = 8.5, 2.1 Hz, 0.13H), 3.76 (t,  $J$  = 7.0 Hz, 0.26H), 3.67 – 3.57 (m, 4.00H), 3.56 – 3.49 (m, 0.87H), 3.00 – 2.83 (m, 1.87H), 2.77 – 2.65 (m, 1.00H), 2.63 – 2.52 (m, 1.00H), 2.30 – 2.20 (m, 1.00H), 2.04 – 1.94 (m, 2.00H), 1.89 – 1.80 (m, 1.00H).  $^{13}\text{C}$  NMR (101 MHz,  $\text{CDCl}_3$ )  $\delta$  206.98, 173.25, 169.63, 135.94, 130.17, 129.54, 128.36, 128.19, 127.14, 126.45, 66.89, 64.79, 51.66, 50.22, 46.68, 34.37, 29.93, 28.15, 27.27, 27.02, 25.33, 22.40.

FT-IR (film): 3448, 1727, 1625, 1417, 1212, 702  $\text{cm}^{-1}$ .

HRMS (ESI-MS)  $m/z$   $[\text{M}+\text{H}]^+$  calcd for  $\text{C}_{16}\text{H}_{20}\text{NO}_4$ : 290.1387, found: 290.1383.

$[\alpha]^{25}_{\text{D}} = +70.3$  ( $c$  1.0,  $\text{CH}_2\text{Cl}_2$ ); 96% ee from (*S*, *R*)-**L1**.

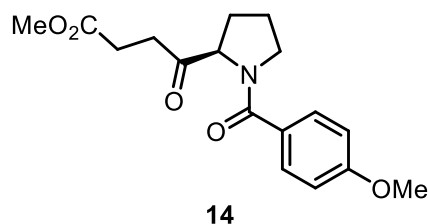

**Methyl (R)-4-(1-(4-methoxybenzoyl)pyrrolidin-2-yl)-4-oxobutanoate (14, from (S, R)-L1).** The title compound was synthesized according to **GP-B** from 4-methoxy-4-oxobutanoic acid and (4-methoxyphenyl)(pyrrolidin-1-yl)methanone. The product was purified by preparative TLC on silica gel (1:3 Acetone/Petroleum ether). Yellow oil.

(*S, R*)-**L1**: 42.6 mg, 67% yield, 97% ee; (*R, S*)-**L1**: 44.7 mg, 70% yield, 97% ee.

HPLC analysis: The ee was determined via HPLC on a CHIRALCEL OD-3 column (25.0% 2-PrOH in hexanes, 0.8 mL/min); retention times for compound obtained using (*S, R*)-**L1**: 11.5 min (major), 16.2 min (minor).

$^1\text{H}$  NMR (400 MHz,  $\text{CDCl}_3$ ) (90:10 mixture of rotamers)  $\delta$  7.62 – 7.49 (m, 1.90H), 6.94 – 6.84 (m, 2.10H), 4.74 (dd,  $J$  = 8.0, 6.2 Hz, 0.90H), 4.52 (brs, 0.10H), 3.82 (s, 3.00H), 3.71 – 3.58 (m, 5.00H), 3.01 – 2.82 (m, 2.00H), 2.76 – 2.66 (m, 1.00H), 2.65 – 2.54 (m, 1.00H), 2.30 – 2.19 (m, 1.00H), 2.04 – 1.94 (m, 2.00H), 1.90 – 1.84 (m, 1.00H).  $^{13}\text{C}$  NMR (101 MHz,  $\text{CDCl}_3$ ) major isomer  $\delta$  207.23, 173.33, 169.34, 161.19, 129.36, 128.03, 113.44, 65.04, 55.29, 51.69, 50.46, 34.38, 28.17, 27.32, 25.56.

FT-IR (film): 3448, 1727, 1609, 1423, 1254, 1174, 765  $\text{cm}^{-1}$ .

HRMS (ESI-MS)  $m/z$   $[\text{M}+\text{H}]^+$  calcd for  $\text{C}_{17}\text{H}_{22}\text{NO}_5$ : 320.1492, found: 320.1488.

$[\alpha]^{25}_{\text{D}} = +65.6$  ( $c$  1.0,  $\text{CH}_2\text{Cl}_2$ ); 97% ee from (*S, R*)-**L1**.

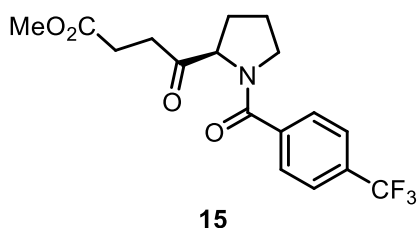

**Methyl (R)-4-oxo-4-(1-(4-(trifluoromethyl)benzoyl)pyrrolidin-2-yl)butanoate (15, from (S, R)-L1).** The title compound was synthesized according to **GP-B** from 4-methoxy-4-oxobutanoic acid and pyrrolidin-1-yl(4-(trifluoromethyl)phenyl)methanone. The product was purified by preparative TLC on silica gel (1:4 Acetone/Petroleum ether). Yellow oil.

(*S, R*)-**L1**: 48.2 mg, 67% yield, 96% ee; (*R, S*)-**L1**: 48.6 mg, 68% yield, 96% ee.

HPLC analysis: The ee was determined via HPLC on a CHIRALPAK AD-3 column (20.0% 2-PrOH in hexanes, 1.0 mL/min); retention times for compound obtained using (*S, R*)-**L1**: 9.8 min (major), 22.4 min (minor).

$^1\text{H}$  NMR (400 MHz,  $\text{CDCl}_3$ ) (88:12 mixture of rotamers)  $\delta$  7.71 – 7.58 (m, 3.76H), 7.42 (d,  $J$  = 8.0 Hz, 0.24H), 4.83 – 4.71 (m, 0.88H), 4.42 (dd,  $J$  = 8.8, 2.7 Hz, 0.12H), 3.78 – 3.75 (m, 0.12H), 3.69 – 3.63 (m, 2.76H), 3.62 – 3.53 (m, 1.24H), 3.51 – 3.44 (m, 0.88H), 2.98 – 2.84 (m, 1.76H), 2.79 – 2.71 (m, 0.88H), 2.68 – 2.49 (m, 1.24H), 2.39 – 2.22 (m, 1.12H), 2.07 – 1.95 (m, 2.00H), 1.92 –

1.84 (m, 1.00H).  $^{13}\text{C}$  NMR (101 MHz,  $\text{CDCl}_3$ )  $\delta$  206.48, 206.33, 173.21, 172.53, 168.91, 168.20, 140.57, 139.48, 132.00 (q,  $J_{\text{C-F}} = 32.8$  Hz), 127.52, 127.03, 125.35 (q,  $J_{\text{C-F}} = 3.8$  Hz), 123.64 (q,  $J_{\text{C-F}} = 272.5$  Hz), 67.06, 64.75, 51.78, 51.73, 50.10, 46.71, 34.58, 33.66, 29.92, 28.09, 27.25, 27.06, 25.23, 22.27.  $^{19}\text{F}$  NMR (376 MHz,  $\text{CDCl}_3$ )  $\delta$  -62.90 (s, 0.36F), -62.93 (s, 2.64F).

FT-IR (film): 3458, 1731, 1633, 1436, 1325, 1127, 856  $\text{cm}^{-1}$ .

HRMS (ESI-MS)  $m/z$   $[\text{M}+\text{H}]^+$  calcd for  $\text{C}_{17}\text{H}_{19}\text{F}_3\text{NO}_4$ : 358.1261, found: 358.1256.

$[\alpha]^{25}_{\text{D}} = +58.2$  (c 1.0,  $\text{CH}_2\text{Cl}_2$ ); 96% ee from (S, R)-**L1**.

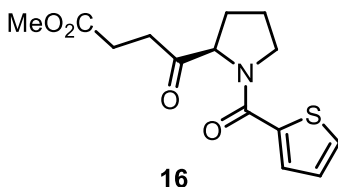

**Methyl (R)-4-oxo-4-(1-(thiophene-2-carbonyl)pyrrolidin-2-yl)butanoate (16**, from (S, R)-**L1**). The title compound was synthesized according to **GP-B** from 4-methoxy-4-oxobutanoic acid and pyrrolidin-1-yl(thiophen-2-yl)methanone. The product was purified by preparative TLC on silica gel (1:3 Acetone/Petroleum ether). Yellow oil.

(S, R)-**L1**: 44.5 mg, 75% yield, 97% ee; (R, S)-**L1**: 43.9 mg, 74% yield, 97% ee.

HPLC analysis: The ee was determined via HPLC on a CHIRALCEL OD-3 column (20.0% 2-PrOH in hexanes, 1.0 mL/min); retention times for compound obtained using (S, R)-**L1**: 15.9 min (major), 21.4 min (minor).

$^1\text{H}$  NMR (400 MHz,  $\text{CDCl}_3$ )  $\delta$  7.56 (d,  $J = 3.8$  Hz, 1H), 7.48 (d,  $J = 5.0$  Hz, 1H), 7.10 – 7.04 (m, 1H), 4.75 (dd,  $J = 8.3, 5.1$  Hz, 1H), 3.99 – 3.86 (m, 2H), 3.64 (s, 3H), 2.89 (t,  $J = 6.4$  Hz, 2H), 2.76 – 2.65 (m, 1H), 2.60 – 2.51 (m, 1H), 2.27 – 2.07 (m, 2H), 2.06 – 1.96 (m, 2H).  $^{13}\text{C}$  NMR (101 MHz,  $\text{CDCl}_3$ )  $\delta$  206.87, 173.28, 161.85, 138.28, 130.29, 130.22, 127.19, 65.85, 51.66, 49.52, 34.49, 27.64, 27.25, 25.49.

FT-IR (film): 3448, 1727, 1601, 1436, 1210, 739  $\text{cm}^{-1}$ .

HRMS (ESI-MS)  $m/z$   $[\text{M}+\text{H}]^+$  calcd for  $\text{C}_{14}\text{H}_{18}\text{NO}_4\text{S}$ : 296.0951, found: 296.0949.

$[\alpha]^{25}_{\text{D}} = +61.9$  (c 1.0,  $\text{CH}_2\text{Cl}_2$ ); 97% ee from (S, R)-**L1**.

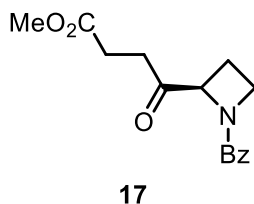

**Methyl (R)-4-(1-benzoylazetidin-2-yl)-4-oxobutanoate (17**, from (S, R)-**L1**). The title compound was synthesized according to **GP-B** from 4-methoxy-4-oxobutanoic acid and azetidin-1-yl(phenyl)methanone. The product was purified by preparative TLC on silica gel (1:3 Acetone/Petroleum ether). Yellow oil.

(S, R)-**L1**: 37.3 mg, 68% yield, 85% ee; (R, S)-**L1**: 37.2 mg, 68% yield, 84% ee.

HPLC analysis: The ee was determined via HPLC on a CHIRALCEL OD-3 column (20.0% 2-PrOH in hexanes, 1.0 mL/min); retention times for compound obtained using (S, R)-**L1**: 12.5 min (major), 16.6 min (minor).

$^1\text{H}$  NMR (400 MHz,  $\text{CDCl}_3$ )  $\delta$  7.73 – 7.57 (m, 2H), 7.50 – 7.36 (m, 3H), 5.14 – 4.92 (m, 1H), 4.44 – 4.30 (m, 1H), 4.20 – 4.09 (m, 1H), 3.65 (s, 3H), 3.19 – 2.78 (m, 2H), 2.72 – 2.60 (m, 2H), 2.59 – 2.35 (m, 2H).  $^{13}\text{C}$  NMR (101 MHz,  $\text{CDCl}_3$ )  $\delta$  206.65, 173.10, 170.64, 132.32, 131.39, 128.40, 127.90, 65.64, 51.73, 51.50, 33.91, 27.22, 19.86.

FT-IR (film): 3445, 2072, 1633, 1404, 1207, 711  $\text{cm}^{-1}$ .

HRMS (ESI-MS)  $m/z$   $[\text{M}+\text{H}]^+$  calcd for  $\text{C}_{15}\text{H}_{18}\text{NO}_4$ : 276.1230, found: 276.1228.

$[\alpha]_{\text{D}}^{25} = +178.6$  ( $c$  1.0,  $\text{CH}_2\text{Cl}_2$ ); 85% ee from (*S*, *R*)-**L1**.

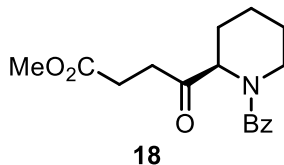

**Methyl (*R*)-4-(1-benzoylpiperidin-2-yl)-4-oxobutanoate (18**, from (*S*, *R*)-**L2**). The title compound was synthesized according to **GP-B** from 4-methoxy-4-oxobutanoic acid and phenyl(piperidin-1-yl)methanone. The product was purified by preparative TLC on silica gel (1:4 Acetone/Petroleum ether). Yellow oil.

(*S*, *R*)-**L2**: 38.2 mg, 63% yield, 94% ee; (*R*, *S*)-**L2**: 39.2 mg, 65% yield, 95% ee.

HPLC analysis: The ee was determined via HPLC on a CHIRALCEL OD-3 column (15.0% 2-PrOH in hexanes, 1.0 mL/min); retention times for compound obtained using (*S*, *R*)-**L2**: 9.5 min (major), 12.2 min (minor).

$^1\text{H}$  NMR (400 MHz,  $\text{CDCl}_3$ ) (75:25 mixture of rotamers)  $\delta$  7.65 – 7.28 (m, 5.00H), 5.40 – 5.32 (m, 0.75H), 4.66 (d,  $J = 13.5$  Hz, 0.13H), 4.34 (s, 0.12H), 3.70 – 3.62 (m, 3.50H), 3.23 – 3.12 (m, 0.75H), 2.95 – 2.75 (m, 1.75H), 2.67 – 2.50 (m, 2.25H), 2.41 – 2.31 (m, 0.75H), 1.94 – 1.62 (m, 3.00H), 1.61 – 1.31 (m, 3.00H).  $^{13}\text{C}$  NMR (101 MHz,  $\text{CDCl}_3$ ) major isomer  $\delta$  207.02, 173.15, 171.50, 135.66, 129.67, 128.45, 126.79, 58.48, 51.77, 46.20, 33.81, 27.41, 25.55, 25.10, 20.65.

FT-IR (film): 3463, 2925, 1716, 1628, 1417, 1261, 703  $\text{cm}^{-1}$ .

HRMS (ESI-MS)  $m/z$   $[\text{M}+\text{H}]^+$  calcd for  $\text{C}_{17}\text{H}_{22}\text{NO}_4$ : 304.1543, found: 304.1541.

$[\alpha]_{\text{D}}^{25} = +78.4$  ( $c$  1.0,  $\text{CH}_2\text{Cl}_2$ ); 94% ee from (*S*, *R*)-**L2**.

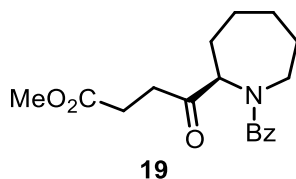

**Methyl (*R*)-4-(1-benzoylazepan-2-yl)-4-oxobutanoate (19**, (*S*, *R*)-**L1**). The title compound was synthesized according to **GP-B** from 4-methoxy-4-oxobutanoic acid and azepan-1-yl(phenyl)methanone. The product was purified by preparative TLC on silica gel (1:5 Acetone/Petroleum ether). Yellow oil.

(*S*, *R*)-**L1**: 36.4 mg, 57% yield, 88% ee; (*R*, *S*)-**L1**: 39.1 mg, 62% yield, 89% ee.

HPLC analysis: The ee was determined via HPLC on a CHIRALCEL OD-3 column (15.0% 2-PrOH in hexanes, 1.0 mL/min); retention times for compound obtained using (*S*, *R*)-**L1**: 10.5 min (major), 13.6 min (minor).

$^1\text{H}$  NMR (400 MHz,  $\text{CDCl}_3$ ) (81:19 mixture of rotamers)  $\delta$  7.40 – 7.34 (m, 4.62H), 7.23 – 7.19 (m, 0.38H), 4.87 (dd,  $J$  = 11.8, 5.0 Hz, 0.81H), 4.53 – 4.45 (m, 0.19H), 4.30 – 4.23 (m, 0.19H), 3.71 – 3.60 (m, 4.00H), 3.32 – 3.22 (m, 0.81H), 2.99 – 2.89 (m, 1.62H), 2.80 – 2.68 (m, 1.00H), 2.67 – 2.51 (m, 1.38H), 2.39 – 2.29 (m, 1.00H), 2.02 – 1.91 (m, 1.00H), 1.83 – 1.73 (m, 2.00H), 1.72 – 1.66 (m, 1.00H), 1.54 – 1.27 (m, 3.00H).  $^{13}\text{C}$  NMR (101 MHz,  $\text{CDCl}_3$ )  $\delta$  207.69, 207.31, 173.35, 172.76, 172.72, 171.66, 136.80, 136.47, 129.34, 129.21, 128.71, 128.38, 126.37, 125.93, 67.18, 64.62, 51.80, 51.70, 47.15, 43.51, 34.42, 33.98, 30.71, 30.64, 29.64, 28.66, 28.41, 27.99, 27.42, 27.21, 26.14, 25.10.

FT-IR (film): 3463, 2927, 1722, 1633, 1417, 1261, 705  $\text{cm}^{-1}$ .

HRMS (ESI-MS)  $m/z$   $[\text{M}+\text{H}]^+$  calcd for  $\text{C}_{18}\text{H}_{24}\text{NO}_4$ : 318.1700, found: 318.1697.

$[\alpha]^{25}_{\text{D}} = +37.3$  ( $c$  1.0,  $\text{CH}_2\text{Cl}_2$ ); 88% ee from (*S*, *R*)-**L1**.

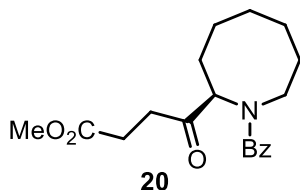

**Methyl (*R*)-4-(1-benzoylazocan-2-yl)-4-oxobutanoate (20**, from (*S*, *R*)-**L1**). The title compound was synthesized according to **GP-B** from 4-methoxy-4-oxobutanoic acid and azocan-1-yl(phenyl)methanone. The product was purified by preparative TLC on silica gel (1:5 Acetone/Petroleum ether). Yellow oil.

(*S*, *R*)-**L1**: 34.0 mg, 51% yield, 80% ee; (*R*, *S*)-**L1**: 34.9 mg, 53% yield, 80% ee.

HPLC analysis: The ee was determined via HPLC on a CHIRALCEL OD-3 column (15.0% 2-PrOH in hexanes, 1.0 mL/min); retention times for compound obtained using (*S*, *R*)-**L1**: 10.3 min (major), 12.0 min (minor).

$^1\text{H}$  NMR (500 MHz,  $\text{CDCl}_3$ ) (68:32 mixture of rotamers)  $\delta$  7.43 – 7.36 (m, 4.68H), 7.27 (d,  $J$  = 4.0 Hz, 0.32H), 4.64 (dd,  $J$  = 11.2, 4.1 Hz, 0.68H), 4.32 – 4.27 (m, 0.32H), 4.22 (dd,  $J$  = 11.2, 4.1 Hz, 0.32H), 3.70 – 3.63 (m, 3.32H), 3.55 – 3.50 (m, 0.68H), 3.43 – 3.36 (m, 0.68H), 2.91 – 2.82 (m, 1.68H), 2.75 – 2.68 (m, 0.68H), 2.62 – 2.56 (m, 1.00H), 2.56 – 2.48 (m, 0.68H), 2.47 – 2.40 (m, 0.32H), 2.19 – 2.02 (m, 2.00H), 2.01 – 1.91 (m, 0.68H), 1.72 – 1.65 (m, 2.00H), 1.63 – 1.53 (m, 3.00H), 1.49 – 1.39 (m, 2.00H).  $^{13}\text{C}$  NMR (126 MHz,  $\text{CDCl}_3$ )  $\delta$  207.26, 206.78, 173.41, 172.72, 172.28, 171.66, 136.96, 136.82, 129.22, 129.21, 128.77, 128.41, 126.12, 125.88, 68.13, 64.48, 51.79, 51.73, 47.59, 43.83, 34.15, 33.93, 28.19, 27.75, 27.40, 26.47, 26.23, 26.13, 26.06, 25.59, 25.55, 25.11, 24.78, 24.13.

FT-IR (film): 3458, 2928, 1721, 1632, 1436, 1209, 704  $\text{cm}^{-1}$ .

HRMS (ESI-MS)  $m/z$   $[\text{M}+\text{H}]^+$  calcd for  $\text{C}_{19}\text{H}_{26}\text{NO}_4$ : 332.1856, found: 332.1851.

$[\alpha]^{25}_{\text{D}} = +43.3$  ( $c$  1.0,  $\text{CH}_2\text{Cl}_2$ ); 80% ee from (*S*, *R*)-**L1**.

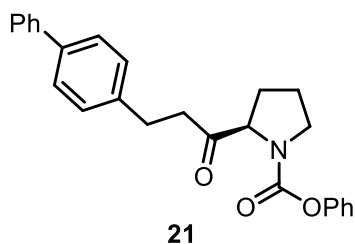

**Phenyl (R)-2-(3-([1,1'-biphenyl]-4-yl)propanoyl)pyrrolidine-1-carboxylate (21**, from (*S*, *R*)-**L1**). The title compound was synthesized according to **GP-B** from 3-([1,1'-biphenyl]-4-yl)propanoic acid and phenyl pyrrolidine-1-carboxylate. The product was purified by preparative TLC on silica gel (6:1 Acetone/Petroleum ether). Yellow oil.

(*S*, *R*)-**L1**: 49.0 mg, 61% yield, 89% ee; (*R*, *S*)-**L1**: 49.3 mg, 62% yield, 90% ee.

HPLC analysis: The ee was determined via HPLC on a CHIRALPAK AD-3 column (15.0% 2-PrOH in hexanes, 1.0 mL/min); retention times for compound obtained using (*S*, *R*)-**L1**: 12.0 min (major), 14.4 min (minor).

<sup>1</sup>H NMR (500 MHz, CDCl<sub>3</sub>) (50:50 mixture of rotamers) δ 7.60 – 7.51 (m, 3.00H), 7.50 – 7.41 (m, 3.00H), 7.40 – 7.26 (m, 4.50H), 7.25 – 7.15 (m, 2.50H), 7.05 – 7.00 (m, 1.00H), 4.59 (dd, *J* = 8.8, 4.4 Hz, 0.50H), 4.52 (dd, *J* = 8.7, 4.4 Hz, 0.50H), 3.78 – 3.61 (m, 2.00H), 3.03 – 2.82 (m, 4.00H), 2.30 – 2.11 (m, 1.00H), 1.98 – 1.77 (m, 3.00H). <sup>13</sup>C NMR (126 MHz, CDCl<sub>3</sub>) δ 207.95, 207.81, 153.40, 152.65, 151.19, 151.01, 140.89, 140.78, 140.15, 139.86, 139.12, 139.03, 129.20, 128.73, 128.68, 127.13, 127.09, 127.04, 126.91, 126.89, 125.31, 125.26, 121.59, 121.54, 65.33, 65.05, 47.35, 47.18, 41.47, 40.59, 29.61, 28.99, 28.97, 28.49, 24.33, 23.40.

FT-IR (film): 3436, 1717, 1488, 1394, 1203, 761 cm<sup>-1</sup>.

HRMS (ESI-MS) *m/z* [M+H]<sup>+</sup> calcd for C<sub>26</sub>H<sub>26</sub>NO<sub>3</sub>: 400.1907, found: 400.1904.

[α]<sub>D</sub><sup>25</sup> = +21.8 (*c* 1.0, CH<sub>2</sub>Cl<sub>2</sub>); 89% ee from (*S*, *R*)-**L1**.

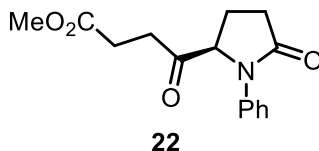

**Methyl (R)-4-oxo-4-(5-oxo-1-phenylpyrrolidin-2-yl)butanoate (22**, from (*S*, *R*)-**L2**). The title compound was synthesized according to **GP-B** from 4-methoxy-4-oxobutanoic acid and 1-phenylpyrrolidin-2-one. The product was purified by preparative TLC on silica gel (1:4 Acetone/Petroleum ether). Yellow oil.

(*S*, *R*)-**L2**: 45.7 mg, 83% yield, 88% ee; (*R*, *S*)-**L2**: 46.7 mg, 84% yield, 88% ee.

HPLC analysis: The ee was determined via HPLC on a CHIRALPAK AS-3 column (40.0% 2-PrOH in hexanes, 0.8 mL/min); retention times for compound obtained using (*S*, *R*)-**L2**: 17.7 min (major), 26.3 min (minor).

<sup>1</sup>H NMR (400 MHz, CDCl<sub>3</sub>) δ 7.46 – 7.40 (m, 2H), 7.37 – 7.31 (m, 2H), 7.18 – 7.12 (m, 1H), 4.85 (dd, *J* = 9.4, 4.1 Hz, 1H), 3.63 (s, 3H), 2.78 – 2.65 (m, 2H), 2.63 – 2.51 (m, 4H), 2.51 – 2.44 (m, 1H), 2.26 – 2.16 (m, 1H). <sup>13</sup>C NMR (101 MHz, CDCl<sub>3</sub>) δ 206.94, 174.31, 172.70, 138.11, 129.05, 125.42, 121.40, 67.29, 51.80, 33.23, 30.74, 27.05, 21.64.

FT-IR (film): 3448, 2956, 1687, 1598, 1260, 755 cm<sup>-1</sup>.

HRMS (ESI-MS) *m/z* [M+H]<sup>+</sup> calcd for C<sub>15</sub>H<sub>18</sub>NO<sub>4</sub>: 276.1230, found: 276.1227.

[α]<sub>D</sub><sup>25</sup> = +38.9 (*c* 1.0, CH<sub>2</sub>Cl<sub>2</sub>); 88% ee from (*S*, *R*)-**L2**.

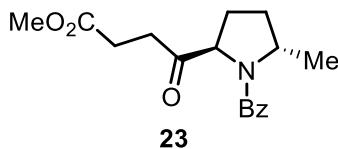

**Methyl 4-((2*R*,5*S*)-1-benzoyl-5-methylpyrrolidin-2-yl)-4-oxobutanoate (23**, from (*S*, *R*)-**L2**). The title compound was synthesized according to **GP-B** from 4-methoxy-4-oxobutanoic acid and (*S*)-(2-methylpyrrolidin-1-yl)(phenyl)methanone. The product was purified by preparative TLC on silica gel (1:4 Acetone/Petroleum ether). Colorless oil.

(*S*, *R*)-**L2**: 38.9 mg, 64% yield, 99:1 dr; (*R*, *S*)-**L2**: 32.3 mg, 53% yield, 34:66 dr.

HPLC analysis: The dr was determined via HPLC on a CHIRALPAK AD-3 column (25.0% 2-PrOH in hexanes, 0.8 mL/min); retention times for compound obtained using (*S*, *R*)-**L2** 6.8 min (major), 11.2 min (minor).

<sup>1</sup>H NMR (500 MHz, CDCl<sub>3</sub>) (76:24 mixture of rotamers) δ 7.52 – 7.44 (m, 1.52H), 7.41 – 7.34 (m, 2.24H), 7.33 – 7.26 (m, 1.24H), 4.82 (dd, *J* = 9.0, 2.8 Hz, 0.76H), 4.64 – 4.50 (m, 0.48H), 4.29 – 4.10 (m, 0.76H), 3.65 (s, 2.28H), 3.57 (s, 0.72H), 2.99 – 2.91 (m, 0.76H), 2.88 – 2.81 (m, 0.76H), 2.79 – 2.71 (m, 0.76H), 2.60 – 2.50 (m, 1.00H), 2.45 – 2.32 (m, 0.48H), 2.30 – 2.11 (m, 1.76H), 2.11 – 1.95 (m, 1.48H), 1.61 – 1.55 (m, 1.00H), 1.31 (d, *J* = 6.4 Hz, 0.72H), 0.86 (d, *J* = 6.4 Hz, 2.28H). <sup>13</sup>C NMR (126 MHz, CDCl<sub>3</sub>) δ 206.48, 206.45, 173.24, 172.60, 170.43, 170.21, 137.78, 136.90, 129.52, 129.23, 128.30, 128.18, 126.74, 126.44, 67.25, 64.52, 55.31, 53.85, 51.66, 34.63, 33.86, 31.80, 29.48, 27.61, 27.30, 26.99, 25.43, 21.17, 19.86.

FT-IR (film): 2970, 1727, 1628, 1409, 1210, 704 cm<sup>-1</sup>.

HRMS (ESI-MS) *m/z* [M+H]<sup>+</sup> calcd for C<sub>17</sub>H<sub>22</sub>NO<sub>4</sub>: 304.1543, found: 304.1542.

[α]<sub>D</sub><sup>25</sup> = +90.5 (*c* 1.0, CH<sub>2</sub>Cl<sub>2</sub>); 99:1 dr from (*S*, *R*)-**L2**.

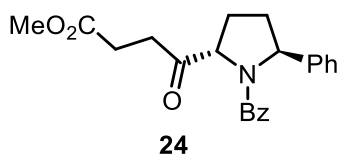

**Methyl 4-((2*S*,5*S*)-1-benzoyl-5-phenylpyrrolidin-2-yl)-4-oxobutanoate (24**, from (*R*, *S*)-**L2**). The title compound was synthesized according to **GP-B** from 4-methoxy-4-oxobutanoic acid and (*S*)-phenyl(2-phenylpyrrolidin-1-yl)methanone. The products were purified by preparative TLC on silica gel (1:4 Acetone/Petroleum ether). Yellow oil.

(*S*, *R*)-**L2**: 37.4 mg, 51% yield, 96:4 dr; (*R*, *S*)-**L2**: 47.3 mg, 65% yield, >99:1 dr.

HPLC analysis: The dr was determined via HPLC on a CHIRALCEL OD-3 column (20.0% 2-PrOH in hexanes, 1.0 mL/min); retention times for compound obtained using (*R*, *S*)-**L2**: 12.9 min (major), 14.4 min (minor).

<sup>1</sup>H NMR (500 MHz, CDCl<sub>3</sub>) (83:17 mixture of rotamers) δ 7.49 – 7.28 (m, 1.66H), 7.25 – 7.18 (m, 3.00H), 7.18 – 7.06 (m, 4.00H), 6.98 – 6.95 (m, 1.34H), 5.65 – 5.56 (m, 0.17H), 5.17 – 4.95 (m, 1.66H), 4.89 – 4.83 (m, 0.17H), 3.71 – 3.59 (m, 3.00H), 3.09 – 2.92 (m, 1.66H), 2.89 – 2.78 (m, 0.83H), 2.70 – 2.54 (m, 1.17H), 2.53 – 2.43 (m, 1.00H), 2.34 – 2.13 (m, 1.34H), 2.09 – 2.02 (m, 1.00H), 1.89 – 1.77 (m, 1.00H). <sup>13</sup>C NMR (126 MHz, CDCl<sub>3</sub>) δ 206.36, 206.15, 173.31, 172.64, 170.97, 170.49, 143.50, 142.77, 137.43, 136.34, 129.54, 129.38, 128.47, 128.25, 127.78, 127.04, 126.99, 126.88, 126.36, 125.43, 125.39, 67.73, 65.50, 63.87, 61.09, 51.71, 34.92, 34.10, 34.02, 31.52, 27.52, 27.35, 27.01, 25.10.

FT-IR (film): 3442, 2922, 1724, 1631, 1397, 698  $\text{cm}^{-1}$ .

HRMS (ESI-MS)  $m/z$   $[M+H]^+$  calcd for  $\text{C}_{22}\text{H}_{24}\text{NO}_4$ : 366.1700, found: 366.1697.

$[\alpha]^{25}_{\text{D}} = -122.3$  ( $c$  1.0,  $\text{CH}_2\text{Cl}_2$ ); >99:1 dr from (*R*, *S*)-**L2**.

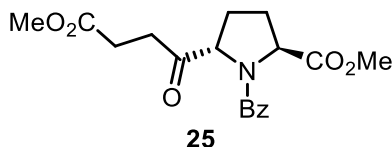

**Methyl (2*S*,5*S*)-1-benzoyl-5-(4-methoxy-4-oxobutanoyl)pyrrolidine-2-carboxylate (25**, from (*R*, *S*)-**L2**). The title compound was synthesized according to **GP-B** from methyl 4-methoxy-4-oxobutanoic acid and methyl benzoyl-*L*-prolinate. The product was purified by preparative TLC on silica gel (1:3 Acetone/Petroleum ether). Colorless oil.

(*S*, *R*)-**L2**: 45.3 mg, 65% yield, 52:48 dr; (*R*, *S*)-**L2**: 49.0 mg, 71% yield, 1:99 dr.

HPLC analysis: The dr was determined via HPLC on a CHIRALPAK AD-3 column (30.0% 2-PrOH in hexanes, 0.8 mL/min); retention times for compound obtained using (*R*, *S*)-**L2**: 13.7 min (minor), 26.9 min (major).

$^1\text{H}$  NMR (500 MHz,  $\text{CDCl}_3$ ) (64:36 mixture of rotamers)  $\delta$  7.39 – 7.30 (m, 5.00H), 4.95 (dd,  $J = 9.2, 2.5$  Hz, 0.64H), 4.85 (dd,  $J = 9.1, 2.0$  Hz, 0.36H), 4.63 (dd,  $J = 9.3, 1.8$  Hz, 0.36H), 4.47 (dd,  $J = 8.6, 1.8$  Hz, 0.64H), 3.77 (s, 1.08H), 3.65 (s, 1.92H), 3.60 (s, 1.08H), 3.51 (s, 1.92H), 3.01 – 2.94 (m, 0.64H), 2.92 – 2.85 (m, 0.64H), 2.82 – 2.75 (m, 0.64H), 2.66 – 2.49 (m, 1.44H), 2.42 – 2.30 (m, 1.00H), 2.27 – 2.22 (m, 0.64H), 2.22 – 2.16 (m, 0.64H), 2.13 – 2.05 (m, 1.00H), 2.04 – 1.98 (m, 1.00H), 1.78 – 1.72 (m, 0.36H).  $^{13}\text{C}$  NMR (126 MHz,  $\text{CDCl}_3$ )  $\delta$  206.47, 206.29, 173.23, 172.61, 172.37, 172.36, 170.47, 170.22, 136.61, 136.06, 129.88, 129.68, 128.34, 126.50, 126.38, 66.91, 64.83, 61.72, 59.44, 52.30, 52.24, 51.76, 51.71, 34.79, 34.03, 29.83, 28.30, 27.29, 27.07, 26.98, 26.03.

FT-IR (film): 2954, 1739, 1644, 1404, 1210, 704  $\text{cm}^{-1}$ .

HRMS (ESI-MS)  $m/z$   $[M+H]^+$  calcd for  $\text{C}_{18}\text{H}_{22}\text{NO}_6$ : 348.1442, found: 348.1437.

$[\alpha]^{25}_{\text{D}} = -104.2$  ( $c$  1.0,  $\text{CH}_2\text{Cl}_2$ ); 1:99 dr from (*R*, *S*)-**L2**.

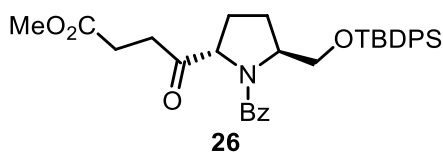

**Methyl 4-((2*S*,5*R*)-1-benzoyl-5-((*tert*-butyldiphenylsilyl)oxy)pyrrolidin-2-yl)-4-oxobutanoate (26**, from (*R*, *S*)-**L2**). The title compound was synthesized according to **GP-B** from 4-methoxy-4-oxobutanoic acid and (*R*)-(2-((*tert*-butyldiphenylsilyl)oxy)pyrrolidin-1-yl)(phenyl)methanone. The product was purified by preparative TLC on silica gel (1:5 Acetone/Petroleum ether). Colorless oil.

(*S*, *R*)-**L2**: 58.0 mg, 52% yield, 67:33 dr; (*R*, *S*)-**L2**: 61.1 mg, 55% yield, 1:99 dr.

HPLC analysis: The dr was determined via HPLC on a CHIRALPAK AD-3 column (15.0% 2-PrOH in hexanes, 1.0 mL/min); retention times for compound obtained using (*R*, *S*)-**L2**: 7.1 min (minor), 10.1 min (major).

$^1\text{H}$  NMR (400 MHz,  $\text{CDCl}_3$ ) (65:35 mixture of rotamers)  $\delta$  7.74 – 7.63 (m, 1.35H), 7.55 – 7.50 (m, 1.35H), 7.46 – 7.27 (m, 12.30H), 4.86 (dd,  $J = 9.7, 1.9$  Hz, 0.65H), 4.63 (d,  $J = 9.2$  Hz, 0.35H), 4.24 – 4.16 (m, 0.65H), 4.09 – 3.96 (m, 0.35H), 3.89 – 3.80 (m, 0.35H), 3.71 – 3.56 (m, 3.35H), 3.34

– 3.27 (m, 0.65H), 3.24 – 3.18 (m, 0.65H), 3.04 – 2.93 (m, 0.65H), 2.89 – 2.75 (m, 1.35H), 2.64 – 2.38 (m, 2.00H), 2.36 – 2.27 (m, 0.65H), 2.23 – 2.14 (m, 1.00H), 2.12 – 2.04 (m, 1.00H), 2.04 – 1.96 (m, 1.00H), 1.65 – 1.54 (m, 0.35H), 1.11 (s, 3.15H), 0.97 (s, 5.85H).  $^{13}\text{C}$  NMR (126 MHz,  $\text{CDCl}_3$ )  $\delta$  206.71, 206.62, 173.23, 172.59, 170.92, 170.20, 137.66, 136.51, 135.49, 135.47, 135.41, 135.25, 133.43, 132.82, 129.77, 129.69, 129.65, 129.47, 129.35, 128.28, 128.19, 127.81, 127.73, 127.70, 127.67, 126.89, 126.30, 67.87, 65.15, 64.72, 64.19, 60.42, 59.41, 51.67, 34.70, 33.87, 28.48, 27.33, 27.32, 27.02, 26.89, 26.69, 25.67, 25.46, 19.27, 19.00.

FT-IR (film): 2953, 1736, 1633, 1407, 1121, 703  $\text{cm}^{-1}$ .

HRMS (ESI-MS)  $m/z$   $[\text{M}+\text{H}]^+$  calcd for  $\text{C}_{33}\text{H}_{40}\text{NO}_5\text{Si}$ : 558.2670, found: 558.2672.

$[\alpha]_{\text{D}}^{25} = -63.6$  (c 1.0,  $\text{CH}_2\text{Cl}_2$ ); 1:99 dr from (R, S)-**L2**.

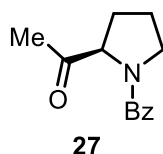

**(R)-1-(1-Benzoylpyrrolidin-2-yl)ethan-1-one (27, from (S, R)-L1).** The title compound was synthesized according to **GP-B** from acetic acid and N-Bz-pyrrolidine. The product was purified by preparative TLC on silica gel (1:4 Acetone/Petroleum ether). Yellow solid.

(S, R)-**L1**: 31.6 mg, 73% yield, 94% ee; (R, S)-**L1**: 32.5 mg, 75% yield, 94% ee.

HPLC analysis: The ee was determined via HPLC on a CHIRALPAK AD-3 column (25.0% 2-PrOH in hexanes, 0.8 mL/min); retention times for compound obtained using (S, R)-**L1**: 5.6 min (major), 7.7 min (minor).

$^1\text{H}$  NMR (500 MHz,  $\text{CDCl}_3$ ) (87:13 mixture of rotamers)  $\delta$  7.57 – 7.52 (m, 1.74H), 7.43 – 7.38 (m, 2.26H), 7.38 – 7.28 (m, 1.00H), 4.73 (dd,  $J = 8.5, 6.0$  Hz, 0.87H), 4.42 (dd,  $J = 8.6, 1.6$  Hz, 0.13H), 3.77 (t,  $J = 6.4$  Hz, 0.26H), 3.63 – 3.58 (m, 0.87H), 3.56 – 3.50 (m, 0.87H), 2.31 – 2.19 (m, 3.74H), 1.99 – 1.92 (m, 1.26H), 1.90 – 1.83 (m, 2.00H).  $^{13}\text{C}$  NMR (126 MHz,  $\text{CDCl}_3$ )  $\delta$  206.61, 169.61, 137.17, 135.99, 130.18, 129.58, 128.36, 128.20, 127.18, 126.45, 67.47, 65.24, 50.13, 46.64, 29.84, 28.11, 27.01, 26.28, 25.31, 22.45.

FT-IR (film): 3440, 1716, 1625, 1422, 1162, 702  $\text{cm}^{-1}$ .

HRMS (ESI-MS)  $m/z$   $[\text{M}+\text{H}]^+$  calcd for  $\text{C}_{13}\text{H}_{16}\text{NO}_2$ : 218.1176, found: 218.1174.

$[\alpha]_{\text{D}}^{25} = +48.3$  (c 1.0,  $\text{CH}_2\text{Cl}_2$ ); 94% ee from (S, R)-**L1**.

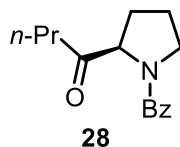

**(R)-1-(1-Benzoylpyrrolidin-2-yl)butan-1-one (28, from (S, R)-L1).** The title compound was synthesized according to **GP-B** from butyric acid and N-Bz-pyrrolidine. The product was purified by preparative TLC on silica gel (2:3 EtOAc/ Petroleum ether). Yellow oil.

(S, R)-**L1**: 32.5 mg, 66% yield, 93% ee; (R, S)-**L1**: 32.0 mg, 65% yield, 94% ee.

HPLC analysis: The ee was determined via HPLC on a CHIRALPAK AD-3 column (25.0% 2-PrOH in hexanes, 0.8 mL/min); retention times for compound obtained using (S, R)-**L1**: 5.4 min (major), 8.0 min (minor).

$^1\text{H}$  NMR (400 MHz,  $\text{CDCl}_3$ ) (85:15 mixture of rotamers)  $\delta$  7.59 – 7.51 (m, 1.70H), 7.45 – 7.33 (m, 2.70H), 7.36 – 7.27 (m, 0.60H), 4.80 – 4.68 (m, 0.85H), 4.42 (dd,  $J$  = 8.8, 1.8 Hz, 0.15H), 3.81 – 3.74 (m, 0.30H), 3.66 – 3.56 (m, 0.85H), 3.58 – 3.47 (m, 0.85H), 2.71 – 2.59 (m, 0.85H), 2.58 – 2.46 (m, 0.85H), 2.31 – 2.10 (m, 1.30H), 2.00 – 1.91 (m, 1.00H), 1.90 – 1.79 (m, 2.00H), 1.73 – 1.60 (m, 1.70H), 1.35 – 1.27 (m, 0.30H), 0.93 (t,  $J$  = 7.4 Hz, 2.55H), 0.70 (t,  $J$  = 7.4 Hz, 0.45H).  $^{13}\text{C}$  NMR (101 MHz,  $\text{CDCl}_3$ )  $\delta$  208.70, 169.51, 136.11, 130.11, 129.46, 128.31, 128.17, 127.19, 126.50, 67.01, 64.74, 50.19, 46.68, 41.90, 40.99, 29.93, 28.27, 25.37, 22.44, 16.72, 16.61, 13.70, 13.49.

FT-IR (film): 3436, 2964, 1721, 1626, 1418, 702  $\text{cm}^{-1}$ .

HRMS (ESI-MS)  $m/z$   $[\text{M}+\text{H}]^+$  calcd for  $\text{C}_{15}\text{H}_{20}\text{NO}_2$ : 246.1489, found: 246.1486.

$[\alpha]^{25}_{\text{D}} = +39.2$  ( $c$  1.0,  $\text{CH}_2\text{Cl}_2$ ); 93% ee from (*S*, *R*)-**L1**.

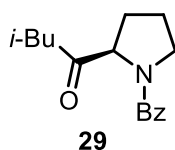

**(*R*)-1-(1-Benzoylpyrrolidin-2-yl)-3-methylbutan-1-one (29, from (*S*, *R*)-**L1**).** The title compound was synthesized according to **GP-B** from 3-methylbutanoic acid and *N*-Bz-pyrrolidine. The product was purified by preparative TLC on silica gel (1:4 Acetone/Petroleum ether). Colorless oil.

(*S*, *R*)-**L1**: 38.0 mg, 73% yield, 93% ee; (*R*, *S*)-**L1**: 38.0 mg, 73% yield, 94% ee.

HPLC analysis: The ee was determined via HPLC on a CHIRALPAK AD-3 column (20.0% 2-PrOH in hexanes, 1.0 mL/min); retention times for compound obtained using (*S*, *R*)-**L1**: 5.8 min (major), 8.8 min (minor).

$^1\text{H}$  NMR (400 MHz,  $\text{CDCl}_3$ ) (85:15 mixture of rotamers)  $\delta$  7.60 – 7.51 (m, 1.70H), 7.43 – 7.35 (m, 2.55H), 7.34 – 7.29 (m, 0.75H), 4.83 – 4.63 (m, 0.85H), 4.41 (dd,  $J$  = 8.8, 2.1 Hz, 0.15H), 3.80 – 3.72 (m, 0.30H), 3.64 – 3.56 (m, 0.85H), 3.55 – 3.47 (m, 0.85H), 2.59 – 2.51 (m, 0.85H), 2.44 – 2.36 (m, 0.85H), 2.29 – 2.18 (m, 1.85H), 2.13 – 2.02 (m, 0.30H), 2.01 – 1.79 (m, 3.85H), 1.78 – 1.60 (m, 0.30H), 0.94 (dd,  $J$  = 11.2, 6.6 Hz, 5.10H), 0.72 (d,  $J$  = 6.6 Hz, 0.45H), 0.65 (d,  $J$  = 6.6 Hz, 0.45H).  $^{13}\text{C}$  NMR (101 MHz,  $\text{CDCl}_3$ )  $\delta$  208.08, 169.51, 136.20, 130.08, 129.45, 128.32, 128.17, 127.19, 126.56, 67.33, 64.97, 50.18, 48.98, 47.98, 46.62, 29.80, 28.06, 25.32, 23.89, 23.66, 22.59, 22.53, 22.40, 22.25.

FT-IR (film): 3448, 2956, 1720, 1628, 1417, 1058, 702  $\text{cm}^{-1}$ .

HRMS (ESI-MS)  $m/z$   $[\text{M}+\text{H}]^+$  calcd for  $\text{C}_{16}\text{H}_{22}\text{NO}_2$ : 260.1645, found: 260.1643.

$[\alpha]^{25}_{\text{D}} = +72.8$  ( $c$  1.0,  $\text{CH}_2\text{Cl}_2$ ); 93% ee from (*S*, *R*)-**L1**.

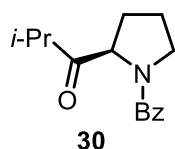

**(*R*)-1-(1-Benzoylpyrrolidin-2-yl)-2-methylpropan-1-one (30, from (*S*, *R*)-**L1**).** The title compound was synthesized according to **GP-B** from isobutyric acid and *N*-Bz-pyrrolidine. The product was purified by preparative TLC on silica gel (1:3 EtOAc/Petroleum ether). Colorless oil.

(*S*, *R*)-**L1**: 28.2 mg, 57% yield, 86% ee; (*R*, *S*)-**L1**: 28.6 mg, 58% yield, 87% ee.

HPLC analysis: The ee was determined via HPLC on a CHIRALPAK AD-3 column (15.0% 2-PrOH in hexanes, 1.0 mL/min); retention times for compound obtained using (*S*, *R*)-**L1**: 6.8 min (major), 8.9 min (minor).

<sup>1</sup>H NMR (500 MHz, CDCl<sub>3</sub>) (81:19 mixture of rotamers) δ 7.59 – 7.50 (m, 1.62H), 7.45 – 7.26 (m, 3.38H), 4.89 (dd, *J* = 8.2, 6.1 Hz, 0.81H), 4.59 (dd, *J* = 9.2, 2.8 Hz, 0.19H), 3.84 – 3.70 (m, 0.38H), 3.67 – 3.58 (m, 0.81H), 3.56 – 3.45 (m, 0.81H), 3.02 – 2.81 (m, 0.81H), 2.37 – 2.18 (m, 1.19H), 2.03 – 1.92 (m, 1.00H), 1.89 – 1.78 (m, 2.00H), 1.22 (d, *J* = 6.9 Hz, 2.43H), 1.15 (d, *J* = 6.9 Hz, 2.43H), 0.91 (d, *J* = 6.8 Hz, 0.57H), 0.46 (d, *J* = 7.0 Hz, 0.57H). <sup>13</sup>C NMR (126 MHz, CDCl<sub>3</sub>) δ 212.52, 211.50, 169.26, 137.51, 136.20, 130.04, 129.33, 128.31, 128.14, 127.21, 126.59, 65.80, 63.28, 50.16, 46.61, 39.05, 37.31, 29.89, 28.74, 25.49, 22.41, 18.40, 18.04, 17.94, 17.72.

FT-IR (film): 3483, 2970, 1719, 1629, 1413, 1049, 702 cm<sup>-1</sup>.

HRMS (ESI-MS) *m/z* [M+H]<sup>+</sup> calcd for C<sub>15</sub>H<sub>20</sub>NO<sub>2</sub>: 246.1489, found: 246.1487.

[α]<sub>D</sub><sup>25</sup> = +59.6 (*c* 1.0, CH<sub>2</sub>Cl<sub>2</sub>); 86% ee from (*S*, *R*)-**L1**.

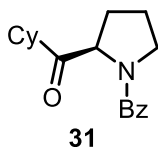

**(*R*)-(1-Benzoylpyrrolidin-2-yl)(cyclohexyl)methanone (31, from (*S*, *R*)-**L1**).** The title compound was synthesized according to **GP-B** from cyclohexanecarboxylic acid and *N*-Bz-pyrrolidine. The product was purified by preparative TLC on silica gel (2:3 EtOAc/Petroleum ether). Yellow solid.

(*S*, *R*)-**L1**: 36.4 mg, 64% yield, 81% ee; (*R*, *S*)-**L1**: 37.2 mg, 65% yield, 85% ee.

HPLC analysis: The ee was determined via HPLC on a CHIRALPAK AD-3 column (15.0% 2-PrOH in hexanes, 1.0 mL/min); retention times for compound obtained using (*S*, *R*)-**L1**: 7.8 min (major), 11.0 min (minor).

<sup>1</sup>H NMR (400 MHz, CDCl<sub>3</sub>) (81:19 mixture of rotamers) 7.61 – 7.47 (m, 1.62H), 7.46 – 7.26 (m, 3.38H), 4.87 (dd, *J* = 8.5, 5.8 Hz, 0.81H), 4.56 (dd, *J* = 9.1, 2.7 Hz, 0.19H), 3.83 – 3.69 (m, 0.38H), 3.67 – 3.58 (m, 0.81H), 3.55 – 3.46 (m, 0.81H), 2.75 – 2.57 (m, 0.81H), 2.29 – 2.17 (m, 1.00H), 2.14 – 2.02 (m, 1.00H), 2.01 – 1.90 (m, 1.19H), 1.87 – 1.75 (m, 4.19H), 1.69 – 1.63 (m, 0.81H), 1.57 – 1.38 (m, 2.00H), 1.38 – 1.18 (m, 3.00H), 1.14 – 0.91 (m, 0.81H), 0.75 – 0.62 (m, 0.19H). <sup>13</sup>C NMR (126 MHz, CDCl<sub>3</sub>) δ 211.76, 210.65, 170.54, 169.19, 137.52, 136.19, 130.02, 129.28, 128.27, 128.12, 127.22, 126.62, 65.92, 63.32, 50.17, 49.06, 47.38, 46.57, 29.77, 28.67, 28.55, 28.27, 28.14, 27.74, 25.80, 25.65, 25.60, 25.50, 25.40, 25.11, 22.39.

FT-IR (film): 3478, 2929, 1716, 1628, 1416, 1143, 701 cm<sup>-1</sup>.

HRMS (ESI-MS) *m/z* [M+H]<sup>+</sup> calcd for C<sub>18</sub>H<sub>24</sub>NO<sub>2</sub>: 286.1802, found: 286.1799.

[α]<sub>D</sub><sup>25</sup> = +46.7 (*c* 1.0, CH<sub>2</sub>Cl<sub>2</sub>); 81% ee from (*S*, *R*)-**L1**.

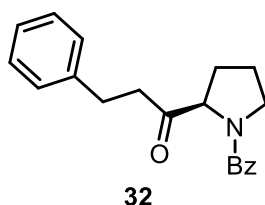

**(R)-1-(1-Benzoylpyrrolidin-2-yl)-3-phenylpropan-1-one (32, from (S, R)-L1).** The title compound was synthesized according to **GP-B** from 3-phenylpropanoic acid and *N*-Bz-pyrrolidine. The product was purified by preparative TLC on silica gel (2:3 EtOAc/Petroleum ether). Yellow oil.

(*S, R*)-**L1**: 39.6 mg, 64% yield, 96% ee; (*R, S*)-**L1**: 43.5 mg, 71% yield, 97% ee.

HPLC analysis: The ee was determined via HPLC on a CHIRALCEL OD-3 column (20.0% 2-PrOH in hexanes, 1.0 mL/min); retention times for compound obtained using (*S, R*)-**L1**: 12.5 min (major), 14.4 min (minor).

<sup>1</sup>H NMR (500 MHz, CDCl<sub>3</sub>) (88:12 mixture of rotamers) δ 7.63 – 7.53 (m, 2.00H), 7.45 – 7.34 (m, 3.00H), 7.32 – 7.27 (m, 1.76H), 7.25 – 7.16 (m, 3.00H), 7.04 (d, *J* = 7.5 Hz, 0.24H), 4.74 (dd, *J* = 8.4, 6.2 Hz, 0.88H), 4.41 (dd, *J* = 9.0, 3.2 Hz, 0.12H), 3.79 – 3.74 (m, 0.24H), 3.62 – 3.55 (m, 0.88H), 3.55 – 3.49 (m, 0.88H), 3.06 – 2.95 (m, 2.64H), 2.92 – 2.84 (m, 0.88H), 2.72 – 2.65 (m, 0.12H), 2.62 – 2.51 (m, 0.36H), 2.20 – 2.12 (m, 1.00H), 1.95 – 1.87 (m, 1.00H), 1.86 – 1.77 (m, 1.00H), 1.76 – 1.68 (m, 1.00H). <sup>13</sup>C NMR (126 MHz, CDCl<sub>3</sub>) δ 207.64, 207.56, 170.25, 169.53, 141.09, 140.41, 136.55, 135.93, 130.12, 129.98, 129.46, 128.33, 128.26, 128.14, 127.13, 126.42, 126.13, 125.93, 66.96, 64.82, 50.11, 46.64, 41.54, 40.94, 29.61, 29.27, 29.02, 27.91, 25.24, 22.35.

FT-IR (film): 3443, 1722, 1626, 1448, 1418, 700 cm<sup>-1</sup>.

HRMS (ESI-MS) *m/z* [M+Na]<sup>+</sup> calcd for C<sub>20</sub>H<sub>21</sub>NNaO<sub>2</sub>: 330.1465, found: 330.1459.

[α]<sub>D</sub><sup>25</sup> = +46.7 (*c* 1.0, CH<sub>2</sub>Cl<sub>2</sub>); 96% ee from (*S, R*)-**L1**.

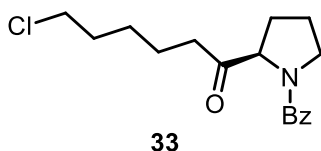

**(R)-1-(1-Benzoylpyrrolidin-2-yl)-6-chlorohexan-1-one (33, from (S, R)-L1).** The title compound was synthesized according to **GP-B** from 6-chlorohexanoic acid and *N*-Bz-pyrrolidine. The product was purified by preparative TLC on silica gel (1:1 EtOAc/Petroleum ether). Yellow oil.

(*S, R*)-**L1**: 43.6 mg, 71% yield, 97% ee; (*R, S*)-**L1**: 44.6 mg, 72% yield, 96% ee.

HPLC analysis: The ee was determined via HPLC on a CHIRALPAK AD-3 column (20.0% 2-PrOH in hexanes, 1.0 mL/min); retention times for compound obtained using (*S, R*)-**L1**: 9.8 min (major), 19.2 min (minor).

<sup>1</sup>H NMR (400 MHz, CDCl<sub>3</sub>) (87:13 mixture of rotamers) δ 7.58 – 7.51 (m, 1.74H), 7.42 – 7.28 (m, 3.26H), 4.78 – 4.66 (m, 0.87H), 4.44 (dd, *J* = 8.9, 2.8 Hz, 0.13H), 3.93 – 3.68 (m, 0.39H), 3.67 – 3.57 (m, 1.00H), 3.57 – 3.47 (m, 2.61H), 3.44 (t, *J* = 6.7 Hz, 0.26H), 2.75 – 2.65 (m, 0.87H), 2.60 – 2.51 (m, 0.87H), 2.27 – 2.18 (m, 1.00H), 2.00 – 1.92 (m, 1.00H), 1.89 – 1.82 (m, 2.00H), 1.80 – 1.74 (m, 1.74H), 1.71 – 1.60 (m, 2.00H), 1.51 – 1.41 (m, 1.74H), 1.29 – 1.25 (m, 0.26H), 1.21 – 1.15 (m, 0.26H). <sup>13</sup>C NMR (101 MHz, CDCl<sub>3</sub>) δ 208.50, 208.17, 170.35, 169.54, 137.34, 136.01, 130.16,

129.49, 128.33, 128.20, 127.18, 126.55, 66.92, 64.75, 50.19, 46.70, 44.80, 44.56, 39.70, 38.87, 32.35, 32.10, 30.03, 28.33, 26.35, 26.10, 25.39, 22.44, 22.33.

FT-IR (film): 3473, 2934, 1721, 1627, 1413, 722  $\text{cm}^{-1}$ .

HRMS (ESI-MS)  $m/z$   $[M+H]^+$  calcd for  $\text{C}_{17}\text{H}_{23}\text{ClNO}_2$ : 308.1412, found: 308.1409.

$[\alpha]^{25}_{\text{D}} = +64.5$  ( $c$  1.0,  $\text{CH}_2\text{Cl}_2$ ); 97% ee from (*S*, *R*)-**L1**.

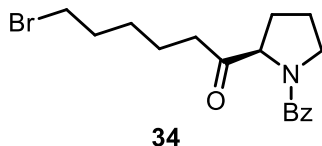

**(*R*)-1-(1-Benzoylpyrrolidin-2-yl)-6-bromohexan-1-one (34, from (*S*, *R*)-**L1**)**. The title compound was synthesized according to **GP-B** from 6-bromohexanoic acid and *N*-Bz-pyrrolidine. The product was purified by preparative TLC on silica gel (1:2 EtOAc/Petroleum ether). Brown oil.

(*S*, *R*)-**L1**: 42.2 mg, 60% yield, 96% ee; (*R*, *S*)-**L1**: 42.1 mg, 60% yield, 96% ee.

HPLC analysis: The ee was determined via HPLC on a CHIRALPAK AD-3 column (20.0% 2-PrOH in hexanes, 1.0 mL/min); retention times for compound obtained using (*S*, *R*)-**L1**: 8.7 min (major), 17.5 min (minor).

$^1\text{H}$  NMR (400 MHz,  $\text{CDCl}_3$ ) (86:14 mixture of rotamers)  $\delta$  7.59 – 7.48 (m, 1.72H), 7.45 – 7.26 (m, 3.28H), 4.72 (dd,  $J = 8.5, 5.9$  Hz, 0.86H), 4.50 – 4.37 (m, 0.14H), 3.82 – 3.71 (m, 0.28H), 3.65 – 3.58 (m, 0.86H), 3.56 – 3.49 (m, 0.86H), 3.44 – 3.22 (m, 2.00H), 2.77 – 2.65 (m, 0.86H), 2.61 – 2.50 (m, 0.86H), 2.31 – 2.17 (m, 1.14H), 2.01 – 1.93 (m, 1.14H), 1.90 – 1.79 (m, 4.00H), 1.70 – 1.62 (m, 1.72H), 1.52 – 1.41 (m, 1.72H), 1.31 – 1.24 (m, 0.28H), 1.22 – 1.14 (m, 0.28H).  $^{13}\text{C}$  NMR (101 MHz,  $\text{CDCl}_3$ )  $\delta$  208.49, 208.16, 170.35, 169.54, 137.33, 135.99, 130.17, 129.50, 128.34, 128.20, 127.18, 126.54, 66.92, 64.75, 50.19, 46.71, 39.67, 38.84, 33.61, 33.30, 32.52, 32.24, 30.03, 28.33, 27.62, 27.36, 25.39, 22.50, 22.31, 22.19.

FT-IR (film): 3445, 2936, 1720, 1627, 1416, 701  $\text{cm}^{-1}$ .

HRMS (ESI-MS)  $m/z$   $[M+H]^+$  calcd for  $\text{C}_{17}\text{H}_{23}\text{BrNO}_2$ : 352.0907, found: 352.0903.

$[\alpha]^{25}_{\text{D}} = +48.3$  ( $c$  1.0,  $\text{CH}_2\text{Cl}_2$ ); 96% ee from (*S*, *R*)-**L1**.

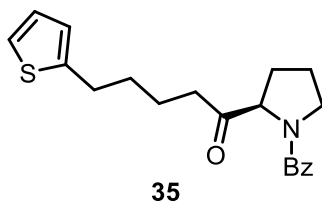

**(*R*)-1-(1-Benzoylpyrrolidin-2-yl)-5-(thiophen-2-yl)pentan-1-one (35, from (*S*, *R*)-**L1**)**. The title compound was synthesized according to **GP-B** from 5-(thiophen-2-yl)pentanoic acid and *N*-Bz-pyrrolidine. The product was purified by preparative TLC on silica gel (2:3 EtOAc/Petroleum ether). Yellow oil.

(*S*, *R*)-**L1**: 30.1 mg, 45% yield, 97% ee; (*R*, *S*)-**L1**: 31.3 mg, 46% yield, 97% ee.

HPLC analysis: The ee was determined via HPLC on a CHIRALPAK AD-3 column (20.0% 2-PrOH in hexanes, 1.0 mL/min); retention times for compound obtained using (*S*, *R*)-**L1**: 8.4 min (major), 18.4 min (minor).

$^1\text{H}$  NMR (400 MHz,  $\text{CDCl}_3$ ) (85:15 mixture of rotamers)  $\delta$  7.60 – 7.49 (m, 1.70H), 7.46 – 7.33 (m, 2.70H), 7.32 – 7.28 (m, 0.60H), 7.13 – 7.03 (m, 1.00H), 6.95 – 6.85 (m, 1.00H), 6.80 – 6.70 (m, 1.00H), 4.74 (dd,  $J$  = 8.6, 5.8 Hz, 0.85H), 4.44 (dd,  $J$  = 8.7, 2.9 Hz, 0.15H), 3.82 – 3.73 (m, 0.30H), 3.67 – 3.57 (m, 0.85H), 3.57 – 3.49 (m, 0.85H), 2.94 – 2.79 (m, 1.70H), 2.78 – 2.64 (m, 1.30H), 2.63 – 2.49 (m, 1.00H), 2.27 – 2.18 (m, 1.00H), 2.02 – 1.92 (m, 1.00H), 1.88 – 1.81 (m, 2.00H), 1.76 – 1.68 (m, 3.40H), 1.46 – 1.40 (m, 0.30H), 1.38 – 1.31 (m, 0.30H).  $^{13}\text{C}$  NMR (126 MHz,  $\text{CDCl}_3$ ) major isomer  $\delta$  208.48, 169.53, 145.05, 136.07, 130.14, 128.19, 127.19, 126.63, 124.08, 122.78, 64.74, 50.17, 39.65, 31.22, 29.68, 28.31, 25.38, 22.69.

FT-IR (film): 3448, 2923, 1717, 1626, 1410, 698  $\text{cm}^{-1}$ .

HRMS (ESI-MS)  $m/z$   $[\text{M}+\text{H}]^+$  calcd for  $\text{C}_{20}\text{H}_{24}\text{NO}_2\text{S}$ : 342.1522, found: 342.1518.

$[\alpha]^{25}_{\text{D}} = +60.7$  ( $c$  1.0,  $\text{CH}_2\text{Cl}_2$ ); 97% ee from (*S*, *R*)-**L1**.

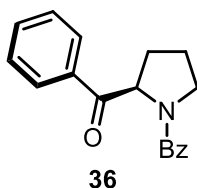

**(*R*)-Pyrrolidine-1,2-diylbis(phenylmethanone)** (**36**, from (*S*, *R*)-**L2**). The title compound was synthesized according to **GP-B** from benzoic acid and *N*-Bz-pyrrolidine. The product was purified by preparative TLC on silica gel (3:2 EtOAc/Petroleum ether). White solid.

(*S*, *R*)-**L2**: 45.2 mg, 81% yield, 96% ee; (*R*, *S*)-**L2**: 47.4 mg, 85% yield, 96% ee.

HPLC analysis: The ee was determined via HPLC on a CHIRALCEL OD-3 column (15.0% 2-PrOH in hexanes, 1.0 mL/min); retention times for compound obtained using (*S*, *R*)-**L2**: 10.8 min (major), 17.6 min (minor).

$^1\text{H}$  NMR (400 MHz,  $\text{CDCl}_3$ ) (84:16 mixture of rotamers)  $\delta$  8.15 – 7.98 (m, 1.68H), 7.64 – 7.54 (m, 2.84H), 7.52 – 7.45 (m, 1.84H), 7.43 – 7.29 (m, 3.16H), 7.22 – 7.16 (m, 0.48H), 5.70 (dd,  $J$  = 8.7, 4.7 Hz, 0.84H), 5.28 – 5.25 (m, 0.16H), 3.92 – 3.85 (m, 0.32H), 3.77 – 3.68 (m, 0.84H), 3.65 – 3.56 (m, 0.84H), 2.45 – 2.35 (m, 0.84H), 2.06 – 1.89 (m, 3.16H).  $^{13}\text{C}$  NMR (101 MHz,  $\text{CDCl}_3$ )  $\delta$  198.25, 197.67, 170.37, 169.23, 136.31, 135.32, 134.24, 133.39, 133.21, 129.99, 129.40, 128.59, 128.48, 128.24, 128.14, 127.92, 127.25, 126.42, 63.94, 61.31, 50.05, 46.71, 31.11, 29.39, 25.31, 22.34.

FT-IR (film): 3445, 1691, 1627, 1418, 1224, 702  $\text{cm}^{-1}$ .

HRMS (ESI-MS)  $m/z$   $[\text{M}+\text{H}]^+$  calcd for  $\text{C}_{18}\text{H}_{18}\text{NO}_2$ : 280.1332, found: 280.1329.

$[\alpha]^{25}_{\text{D}} = +27.1$  ( $c$  1.0,  $\text{CH}_2\text{Cl}_2$ ); 96% ee from (*S*, *R*)-**L2**.

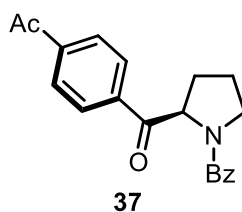

**1-(4-(Benzoyl-*D*-prolyl)phenyl)ethan-1-one (37, from (*S, R*)-L2).** The title compound was synthesized according to **GP-B** from 4-acetylbenzoic acid and *N*-Bz-pyrrolidine. The product was purified by preparative TLC on silica gel (1:4 Acetone/Petroleum ether). Yellow oil.

(*S, R*)-L2: 30.7 mg, 48% yield, 98% ee; (*R, S*)-L2: 32.0 mg, 50% yield, 98% ee.

HPLC analysis: The ee was determined via HPLC on a CHIRALCEL OD-3 column (30.0% 2-PrOH in hexanes, 0.8 mL/min); retention times for compound obtained using (*S, R*)-L2: 16.6 min (major), 37.2 min (minor).

<sup>1</sup>H NMR (400 MHz, CDCl<sub>3</sub>) (85:15 mixture of rotamers) δ 8.19 – 7.96 (m, 3.55H), 7.93 – 7.78 (m, 0.45H), 7.67 – 7.57 (m, 1.85H), 7.45 – 7.37 (m, 2.55H), 7.31 – 7.26 (m, 0.30H), 7.21 – 7.17 (m, 0.30H), 5.66 (dd, *J* = 8.8, 5.1 Hz, 0.85H), 5.32 – 5.20 (m, 0.15H), 3.94 – 3.83 (m, 0.30H), 3.77 – 3.69 (m, 0.85H), 3.67 – 3.57 (m, 0.85H), 2.66 – 2.56 (m, 3.00H), 2.45 – 2.30 (m, 1.00H), 2.09 – 2.01 (m, 1.00H), 1.99 – 1.93 (m, 2.00H). <sup>13</sup>C NMR (101 MHz, CDCl<sub>3</sub>) δ 197.57, 197.42, 170.36, 169.28, 140.19, 139.44, 138.80, 137.17, 135.99, 130.16, 129.51, 128.63, 128.57, 128.45, 128.31, 128.20, 128.10, 127.25, 126.38, 64.08, 61.56, 50.07, 46.74, 30.98, 29.24, 26.79, 26.72, 25.42, 22.40.

FT-IR (film): 3448, 1686, 1625, 1420, 1265, 701 cm<sup>-1</sup>.

HRMS (ESI-MS) *m/z* [M+H]<sup>+</sup> calcd for C<sub>20</sub>H<sub>20</sub>NO<sub>3</sub>: 322.1438, found: 322.1434.

[α]<sub>D</sub><sup>25</sup> = −2.3 (*c* 1.0, CH<sub>2</sub>Cl<sub>2</sub>); 98% ee from (*S, R*)-L2.

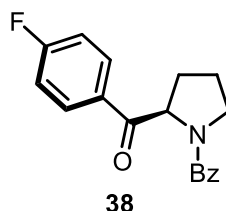

**(*R*)-(1-Benzoylpyrrolidin-2-yl)(4-fluorophenyl)methanone (38, from (*S, R*)-L2).** The title compound was synthesized according to **GP-B** from 4-fluorobenzoic acid and *N*-Bz-pyrrolidine. The product was purified by preparative TLC on silica gel (3:2 EtOAc/Petroleum ether). White solid.

(*S, R*)-L2: 50.5 mg, 85% yield, 96% ee; (*R, S*)-L2: 47.9 mg, 81% yield, 97% ee.

HPLC analysis: The ee was determined via HPLC on a CHIRALCEL OD-3 column (15.0% 2-PrOH in hexanes, 1.0 mL/min); retention times for compound obtained using (*S, R*)-L2: 10.1 min (major), 21.9 min (minor).

<sup>1</sup>H NMR (500 MHz, CDCl<sub>3</sub>) (85:15 mixture of rotamers) δ 8.13 – 8.00 (m, 1.70H), 7.65 – 7.56 (m, 2.00H), 7.47 – 7.36 (m, 2.70H), 7.30 – 7.27 (m, 0.30H), 7.21 – 7.11 (m, 2.00H), 7.01 (t, *J* = 8.4 Hz, 0.30H), 5.72 – 5.61 (m, 0.85H), 5.22 (dd, *J* = 9.1, 2.5 Hz, 0.15H), 3.91 – 3.81 (m, 0.30H), 3.75 – 3.68 (m, 0.85H), 3.64 – 3.57 (m, 0.85H), 2.41 – 2.27 (m, 1.00H), 2.06 – 1.99 (m, 1.00H), 1.98 – 1.90 (m, 2.00H). <sup>13</sup>C NMR (101 MHz, CDCl<sub>3</sub>) δ 196.76, 196.31, 170.36, 169.28, 165.81 (d, *J*<sub>C-F</sub> = 254.9 Hz), 137.22, 136.15, 131.79 (d, *J*<sub>C-F</sub> = 3.2 Hz), 131.17 (d, *J*<sub>C-F</sub> = 9.3 Hz), 130.62 (d, *J*<sub>C-F</sub> = 9.3 Hz), 130.10, 129.47, 128.28, 128.18, 127.27, 126.41, 115.84 (d, *J*<sub>C-F</sub> = 22.0 Hz), 115.76 (d, *J*<sub>C-F</sub> = 22.0 Hz),

63.73, 61.13, 50.08, 46.73, 31.14, 29.37, 25.38, 22.41.  $^{19}\text{F}$  NMR (471 MHz,  $\text{CDCl}_3$ )  $\delta$  -103.90 (s, 0.45F), -104.80 (s, 2.55F).

FT-IR (film): 3471, 1694, 1626, 1598, 1417, 1226, 1157, 701  $\text{cm}^{-1}$ .

HRMS (ESI-MS)  $m/z$   $[\text{M}+\text{H}]^+$  calcd for  $\text{C}_{18}\text{H}_{17}\text{FNO}_2$ : 298.1238, found: 298.1234.

$[\alpha]^{25}_{\text{D}} = +19.9$  (c 1.0,  $\text{CH}_2\text{Cl}_2$ ); 96% ee from (S, R)-**L2**.

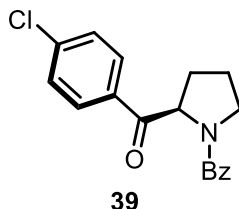

**(R)-(1-Benzoylpyrrolidin-2-yl)(4-chlorophenyl)methanone (39, from (S, R)-L2).** The title compound was synthesized according to **GP-B** from 4-chlorobenzoic acid and *N*-Bz-pyrrolidine. The product was purified by preparative TLC on silica gel (1:1 EtOAc/Petroleum ether). Colorless oil.

(S, R)-**L2**: 48.6 mg, 77% yield, 97% ee; (R, S)-**L2**: 51.9 mg, 83% yield, 97% ee.

HPLC analysis: The ee was determined via HPLC on a CHIRALCEL OD-3 column (15.0% 2-PrOH in hexanes, 1.0 mL/min); retention times for compound obtained using (S, R)-**L2**: 11.4 min (major), 26.0 min (minor).

$^1\text{H}$  NMR (400 MHz,  $\text{CDCl}_3$ ) (85:15 mixture of rotamers)  $\delta$  8.06 – 7.95 (m, 1.70H), 7.64 – 7.57 (m, 1.70H), 7.56 – 7.52 (m, 0.30H), 7.49 – 7.37 (m, 4.25H), 7.35 – 7.26 (m, 0.60H), 7.24 – 7.15 (m, 0.45H), 5.63 (dd,  $J = 8.8, 4.9$  Hz, 0.85H), 5.24 – 5.17 (m, 0.15H), 3.94 – 3.84 (m, 0.30H), 3.77 – 3.69 (m, 0.85H), 3.66 – 3.58 (m, 0.85H), 2.43 – 2.29 (m, 1.00H), 2.10 – 1.90 (m, 3.00H).  $^{13}\text{C}$  NMR (101 MHz,  $\text{CDCl}_3$ )  $\delta$  196.74, 169.25, 139.65, 137.21, 136.10, 133.76, 130.10, 129.90, 129.48, 129.31, 128.93, 128.28, 128.18, 127.26, 126.40, 63.76, 61.18, 50.06, 46.72, 31.09, 29.32, 25.39, 22.40.

FT-IR (film): 3448, 1693, 1626, 1417, 1222, 1091, 702  $\text{cm}^{-1}$ .

HRMS (ESI-MS)  $m/z$   $[\text{M}+\text{H}]^+$  calcd for  $\text{C}_{18}\text{H}_{17}\text{ClNO}_2$ : 314.0942, found: 314.0938.

$[\alpha]^{25}_{\text{D}} = +9.6$  (c 1.0,  $\text{CH}_2\text{Cl}_2$ ); 97% ee from (S, R)-**L2**.

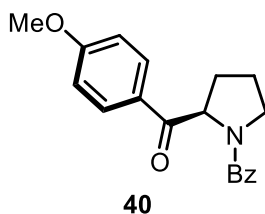

**(R)-(1-Benzoylpyrrolidin-2-yl)(4-methoxyphenyl)methanone (40, from (S, R)-L2).** The title compound was synthesized according to **GP-B** from 4-methoxybenzoic acid and *N*-Bz-pyrrolidine. The product was purified by preparative TLC on silica gel (1:4 Acetone/Petroleum ether). Yellow solid.

(S, R)-**L2**: 43.7 mg, 71% yield, 97% ee; (R, S)-**L2**: 43.7 mg, 71% yield, 96% ee.

HPLC analysis: The ee was determined via HPLC on a CHIRALCEL OD-3 column (20.0% 2-PrOH in hexanes, 1.0 mL/min); retention times for compound obtained using (S, R)-**L2**: 14.6 min (major), 24.2 min (minor).

$^1\text{H}$  NMR (500 MHz,  $\text{CDCl}_3$ ) (80:20 mixture of rotamers)  $\delta$  8.08 – 8.01 (m, 1.60H), 7.64 – 7.57 (m, 2.00H), 7.43 – 7.37 (m, 2.40H), 7.32 – 7.27 (m, 0.40H), 7.23 – 7.15 (m, 0.60H), 6.98 – 6.91 (m, 1.60H), 6.82 (d,  $J$  = 8.5 Hz, 0.40H), 5.68 (dd,  $J$  = 8.7, 4.9 Hz, 0.80H), 5.24 – 5.17 (m, 0.20H), 3.90 – 3.84 (m, 2.80H), 3.81 (s, 0.60H), 3.74 – 3.68 (m, 0.80H), 3.62 – 3.56 (m, 0.80H), 2.43 – 2.27 (m, 1.00H), 2.04 – 1.89 (m, 3.00H).  $^{13}\text{C}$  NMR (126 MHz,  $\text{CDCl}_3$ )  $\delta$  196.07, 169.24, 163.64, 136.44, 130.83, 130.31, 129.93, 129.37, 128.19, 128.16, 128.13, 127.25, 126.46, 113.81, 63.65, 60.95, 55.43, 50.09, 46.74, 31.34, 29.56, 25.31, 22.38.

FT-IR (film): 3448, 1683, 1627, 1601, 1420, 1231, 1170, 701  $\text{cm}^{-1}$ .

HRMS (ESI-MS)  $m/z$   $[\text{M}+\text{H}]^+$  calcd for  $\text{C}_{19}\text{H}_{20}\text{NO}_3$ : 310.1438, found: 310.1434.

$[\alpha]_{\text{D}}^{25} = +9.4$  (c 1.0,  $\text{CH}_2\text{Cl}_2$ ); 97% ee from (*S*, *R*)-**L2**.

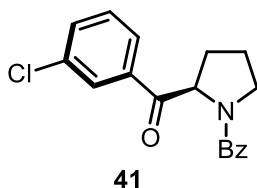

**(*R*)-(1-Benzoylpyrrolidin-2-yl)(3-chlorophenyl)methanone (41, from (*S*, *R*)-**L2**).** The title compound was synthesized according to **GP-B** from 3-chlorobenzoic acid and *N*-Bz-pyrrolidine. The product was purified by preparative TLC on silica gel (1:1 EtOAc/Petroleum ether). Yellow oil.

(*S*, *R*)-**L2**: 42.7 mg, 68% yield, 97% ee; (*R*, *S*)-**L2**: 42.7 mg, 68% yield, 97% ee.

HPLC analysis: The ee was determined via HPLC on a CHIRALCEL OD-3 column (20.0% 2-PrOH in hexanes, 1.0 mL/min); retention times for compound obtained using (*S*, *R*)-**L2**: 8.4 min (major), 13.8 min (minor).

$^1\text{H}$  NMR (400 MHz,  $\text{CDCl}_3$ ) (85:15 mixture of rotamers)  $\delta$  8.01 (t,  $J$  = 1.9 Hz, 0.85H), 7.93 (d,  $J$  = 7.7 Hz, 0.85H), 7.63 – 7.51 (m, 2.70H), 7.48 – 7.36 (m, 3.70H), 7.33 – 7.26 (m, 0.45H), 7.25 – 7.17 (m, 0.45H), 5.61 (dd,  $J$  = 8.8, 5.0 Hz, 0.85H), 5.20 (dd,  $J$  = 8.9, 2.4 Hz, 0.15H), 3.95 – 3.82 (m, 0.30H), 3.78 – 3.69 (m, 0.85H), 3.66 – 3.58 (m, 0.85H), 2.44 – 2.30 (m, 1.00H), 2.11 – 1.90 (m, 3.00H).  $^{13}\text{C}$  NMR (101 MHz,  $\text{CDCl}_3$ )  $\delta$  196.77, 169.22, 137.03, 136.02, 134.91, 133.34, 133.10, 130.12, 129.95, 129.51, 128.52, 128.32, 128.17, 127.97, 127.25, 126.52, 126.38, 125.88, 63.85, 61.34, 50.04, 46.70, 31.05, 29.28, 25.39, 22.38.

FT-IR (film): 2924, 1698, 1627, 1417, 1206, 725  $\text{cm}^{-1}$ .

HRMS (ESI-MS)  $m/z$   $[\text{M}+\text{H}]^+$  calcd for  $\text{C}_{18}\text{H}_{17}\text{ClNO}_2$ : 314.0942, found: 314.0938.

$[\alpha]_{\text{D}}^{25} = +15.1$  (c 1.0,  $\text{CH}_2\text{Cl}_2$ ); 97% ee from (*S*, *R*)-**L2**.

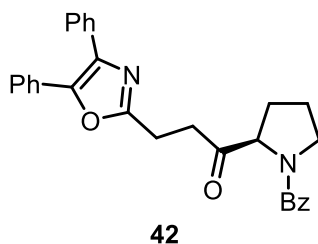

**(R)-1-(1-Benzoylpyrrolidin-2-yl)-3-(4,5-diphenyloxazol-2-yl)propan-1-one (42**, from (*S*, *R*)-**L1**). The title compound was synthesized according to **GP-B** from 3-(4,5-diphenyloxazol-2-yl)propanoic acid and *N*-Bz-pyrrolidine. The product was purified by preparative TLC on silica gel (1:4 Acetone/Petroleum ether). White solid.

(*S*, *R*)-**L1**: 49.0 mg, 54% yield, 99% ee; (*R*, *S*)-**L1**: 44.3 mg, 49% yield, 98% ee.

HPLC analysis: The ee was determined via HPLC on a CHIRALPAK AD-3 column (20.0% 2-PrOH in hexanes, 1.0 mL/min); retention times for compound obtained using (*S*, *R*)-**L1**: 9.8 min (major), 21.2 min (minor).

<sup>1</sup>H NMR (400 MHz, CDCl<sub>3</sub>) (85:15 mixture of rotamers) δ 7.70 – 7.49 (m, 5.85H), 7.47 – 7.26 (m, 9.15H), 4.83 (dd, *J* = 8.4, 6.0 Hz, 0.85H), 4.52 (dd, *J* = 8.8, 3.1 Hz, 0.15H), 3.85 – 3.75 (m, 0.30H), 3.71 – 3.60 (m, 0.85H), 3.61 – 3.51 (m, 0.85H), 3.36 – 3.10 (m, 3.40H), 3.09 – 2.80 (m, 0.30H), 2.36 – 2.12 (m, 1.30H), 2.14 – 2.03 (m, 0.85H), 2.06 – 1.94 (m, 1.15H), 1.92 – 1.81 (m, 1.00H). <sup>13</sup>C NMR (101 MHz, CDCl<sub>3</sub>) major isomer δ 206.72, 169.70, 162.36, 145.34, 135.97, 134.93, 132.55, 130.23, 128.96, 128.55, 128.46, 128.34, 128.24, 127.92, 127.81, 127.23, 126.44, 64.91, 50.24, 36.30, 28.22, 25.38, 21.77.

FT-IR (film): 3448, 1724, 1627, 1415, 765, 696 cm<sup>-1</sup>.

HRMS (ESI-MS) *m/z* [M+H]<sup>+</sup> calcd for C<sub>29</sub>H<sub>27</sub>N<sub>2</sub>O<sub>3</sub>: 451.2016, found: 451.2014.

[α]<sub>D</sub><sup>25</sup> = +60.8 (*c* 1.0, CH<sub>2</sub>Cl<sub>2</sub>); 99% ee from (*S*, *R*)-**L1**.

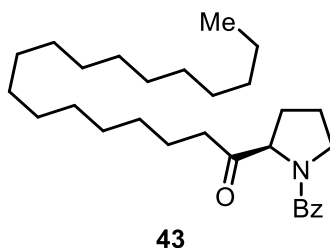

**(R)-1-(4-(1-(Thiophene-2-carbonyl)pyrrolidin-2-yl)phenyl)ethan-1-one (43** from (*S*, *R*)-**L1**). The title compound was synthesized according to **GP-B** from stearic acid and *N*-Bz-pyrrolidine. The product was purified by preparative TLC on silica gel (1:4 Acetone/Petroleum ether). White solid.

(*S*, *R*)-**L1**: 45.2 mg, 51% yield, 94% ee; (*R*, *S*)-**L1**: 45.4 mg, 51% yield, 92% ee.

HPLC analysis: The ee was determined via HPLC on a CHIRALPAK AD-3 column (5.0% 2-PrOH in hexanes, 0.8 mL/min); retention times for compound obtained using (*S*, *R*)-**L1**: 7.5 min (major), 14.3 min (minor).

<sup>1</sup>H NMR (400 MHz, CDCl<sub>3</sub>) (83:17 mixture of rotamers) δ 7.58 – 7.51 (m, 1.66H), 7.44 – 7.27 (m, 3.34H), 4.75 (dd, *J* = 8.6, 5.8 Hz, 0.83H), 4.43 (dd, *J* = 8.9, 2.7 Hz, 0.17H), 3.81 – 3.74 (m, 0.34H), 3.65 – 3.58 (m, 0.83H), 3.56 – 3.47 (m, 0.83H), 2.71 – 2.61 (m, 0.83H), 2.59 – 2.46 (m,

0.83H), 2.29 – 2.14 (m, 1.17H), 2.03 – 1.92 (m, 1.17H), 1.90 – 1.79 (m, 2.34H), 1.67 – 1.58 (m, 1.66H), 1.32 – 1.20 (m, 28.00H), 0.87 (t,  $J = 6.7$  Hz, 3.00H).  $^{13}\text{C}$  NMR (101 MHz,  $\text{CDCl}_3$ )  $\delta$  208.85, 169.52, 136.21, 130.10, 129.47, 128.32, 128.19, 127.23, 126.58, 67.01, 64.72, 50.19, 46.69, 40.13, 39.19, 31.88, 30.00, 29.65, 29.61, 29.58, 29.45, 29.42, 29.31, 29.25, 28.99, 28.33, 25.39, 23.30, 23.21, 22.64, 22.50, 14.05.

FT-IR (film): 2924, 2853, 1723, 1632, 1411, 700  $\text{cm}^{-1}$ .

HRMS (ESI-MS)  $m/z$   $[\text{M}+\text{H}]^+$  calcd for  $\text{C}_{29}\text{H}_{48}\text{NO}_2$ : 442.3680, found: 442.3675.

$[\alpha]^{25}_{\text{D}} = +39.2$  (c 1.0,  $\text{CH}_2\text{Cl}_2$ ); 94% ee from (S, R)-L1.

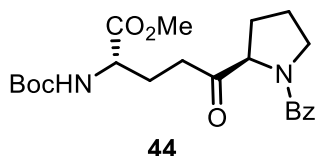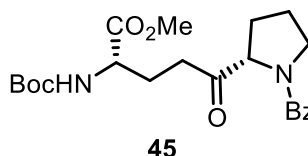

**Methyl (S)-5-((R)-1-benzoylpyrrolidin-2-yl)-2-((tert-butoxycarbonyl)amino)-5-oxopentanoate (44, from (S, R)-L1).** The title compound was synthesized according to GP-B from (S)-4-((tert-butoxycarbonyl)amino)-5-methoxy-5-oxopentanoic acid and N-Bz-pyrrolidine. The product was purified by preparative TLC on silica gel (2:7 Acetone/Petroleum ether). Yellow oil.

(S, R)-L1: 52.5 mg, 63% yield, 99:1 dr; (R, S)-L1: 57.1 mg, 68% yield, 2:98 dr.

HPLC analysis: The dr was determined via HPLC on a CHIRALPAK AD-3 column (20.0% 2-PrOH in hexanes, 1.0 mL/min); retention times for compound obtained using (S, R)-L1: 14.2 min (major), 25.7 min (minor).

NMR data for the product **44**:

$^1\text{H}$  NMR (400 MHz,  $\text{CDCl}_3$ ) (80:20 mixture of rotamers)  $\delta$  7.61 – 7.50 (m, 1.80H), 7.47 – 7.33 (m, 3.00H), 7.30 – 7.26 (m, 0.20H), 5.15 (d,  $J = 8.6$  Hz, 0.80H), 4.91 (s, 0.20H), 4.72 (dd,  $J = 8.3, 5.6$  Hz, 0.80H), 4.43 (d,  $J = 8.7$  Hz, 0.20H), 4.34 – 4.22 (m, 0.80H), 4.14 – 4.05 (m, 0.20H), 3.83 – 3.69 (m, 3.20H), 3.67 – 3.59 (m, 1.00H), 3.58 – 3.49 (m, 1.00H), 2.88 – 2.79 (m, 0.80H), 2.73 – 2.55 (m, 1.00H), 2.30 – 2.12 (m, 2.00H), 2.07 – 1.82 (m, 4.00H), 1.42 (s, 9.00H).  $^{13}\text{C}$  NMR (126 MHz,  $\text{CDCl}_3$ ) major isomer  $\delta$  207.79, 172.77, 169.59, 155.45, 135.90, 130.21, 128.20, 127.19, 79.79, 64.84, 53.05, 52.27, 50.18, 35.91, 28.28, 28.23, 25.85, 25.37.

NMR data for the product **45**:

$^1\text{H}$  NMR (400 MHz,  $\text{CDCl}_3$ ) (79:21 mixture of rotamers)  $\delta$  7.64 – 7.49 (m, 1.79H), 7.47 – 7.30 (m, 3.00H), 7.28 (s, 0.21H), 5.12 (d,  $J = 8.4$  Hz, 0.79H), 4.95 (s, 0.21H), 4.71 (dd,  $J = 8.3, 5.7$  Hz, 0.79H), 4.40 (d,  $J = 9.0$  Hz, 0.21H), 4.36 – 4.24 (m, 0.79H), 4.18 – 4.03 (m, 0.21H), 3.86 – 3.69 (m, 3.21H), 3.67 – 3.45 (m, 2.00H), 2.87 – 2.63 (m, 1.79H), 2.46 – 2.33 (m, 0.21H), 2.28 – 2.16 (m, 1.79H), 2.05 – 1.80 (m, 4.00H), 1.43 (s, 9.00H).  $^{13}\text{C}$  NMR (126 MHz,  $\text{CDCl}_3$ ) major isomer  $\delta$  207.55, 172.77, 169.47, 155.45, 135.90, 130.11, 128.13, 127.10, 79.71, 64.69, 52.69, 52.20, 50.10, 35.80, 28.17, 26.10, 25.31.

FT-IR (film): 3226, 2977, 1713, 1625, 1519, 1420, 1166, 1052, 702  $\text{cm}^{-1}$ .

HRMS (ESI-MS)  $m/z$   $[\text{M}+\text{Na}]^+$  calcd for  $\text{C}_{22}\text{H}_{30}\text{N}_2\text{NaO}_6$ : 441.1996, found: 441.1994.

$[\alpha]^{25}_{\text{D}} = +49.1$  (c 1.0,  $\text{CH}_2\text{Cl}_2$ ); 99:1 dr from (S, R)-L1.

$[\alpha]^{25}_{\text{D}} = -37.9$  (c 1.0,  $\text{CH}_2\text{Cl}_2$ ); 2:98 dr from (R, S)-L1

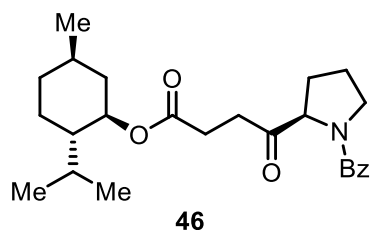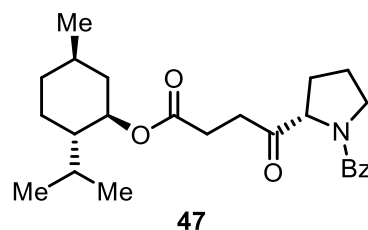

**(1R,2S,5R)-2-Isopropyl-5-methylcyclohexyl 4-((R)-1-benzoylpyrrolidin-2-yl)-4-oxobutanoate (46, from (S, R)-L1).** The title compound was synthesized according to GP-B from 4-(((1R,2S,5R)-2-isopropyl-5-methylcyclohexyl)oxy)-4-oxobutanoic acid and *N*-Bz-pyrrolidine. The product was purified by preparative TLC on silica gel (1:3 Acetone/Petroleum ether). Yellow oil.

(*S, R*)-L1: 58.7 mg, 71% yield, 98:2 dr; (*R, S*)-L1: 59.1 mg, 71% yield, 2:98 dr.

HPLC analysis: The dr was determined via HPLC on a CHIRALPAK AD-3 column (10.0% 2-PrOH in hexanes, 1.0 mL/min); retention times for compound obtained using (*S, R*)-L1: 11.2 min (major), 18.1 min (minor).

NMR data for the product **46**:

$^1\text{H}$  NMR (500 MHz,  $\text{CDCl}_3$ ) (90:10 mixture of rotamers)  $\delta$  7.58 – 7.50 (m, 1.80H), 7.43 – 7.35 (m, 2.80H), 7.34 – 7.29 (m, 0.40H), 4.78 – 4.70 (m, 0.90H), 4.68 – 4.56 (m, 1.00H), 4.48 – 4.38 (m, 0.10H), 3.78 – 3.74 (m, 0.20H), 3.67 – 3.58 (m, 1.00H), 3.57 – 3.46 (m, 0.90H), 3.07 – 2.98 (m, 0.20H), 2.98 – 2.83 (m, 1.80H), 2.72 – 2.63 (m, 0.90H), 2.60 – 2.51 (m, 0.90H), 2.49 – 2.42 (m, 0.10H), 2.27 – 2.19 (m, 1.00H), 2.03 – 1.92 (m, 3.00H), 1.89 – 1.80 (m, 2.00H), 1.69 – 1.61 (m, 2.00H), 1.48 – 1.40 (m, 1.00H), 1.38 – 1.31 (m, 1.00H), 1.02 – 0.91 (m, 2.00H), 0.90 – 0.80 (m, 7.00H), 0.78 – 0.69 (m, 3.00H).  $^{13}\text{C}$  NMR (126 MHz,  $\text{CDCl}_3$ ) major isomer  $\delta$  206.92, 172.34, 169.54, 135.97, 130.12, 128.14, 127.14, 74.34, 64.74, 50.20, 46.87, 40.74, 34.49, 34.13, 31.28, 28.14, 27.75, 26.15, 25.32, 23.38, 21.87, 20.62, 16.24.

NMR data for the product **47**:

$^1\text{H}$  NMR (500 MHz,  $\text{CDCl}_3$ ) (90:10 mixture of rotamers)  $\delta$  7.59 – 7.50 (m, 1.80H), 7.43 – 7.35 (m, 2.80H), 7.34 – 7.30 (m, 0.40H), 4.78 – 4.69 (m, 0.90H), 4.69 – 4.62 (m, 0.90H), 4.61 – 4.56 (m, 0.10H), 4.43 (dd,  $J$  = 9.0, 3.0 Hz, 0.10H), 3.79 – 3.74 (m, 0.20H), 3.67 – 3.58 (m, 1.00H), 3.57 – 3.45 (m, 0.90H), 3.03 (s, 0.20H), 2.90 (t,  $J$  = 6.5 Hz, 1.80H), 2.74 – 2.65 (m, 0.90H), 2.60 – 2.47 (m, 1.00H), 2.29 – 2.20 (m, 1.00H), 2.05 – 1.92 (m, 3.00H), 1.90 – 1.80 (m, 2.00H), 1.68 – 1.61 (m, 2.00H), 1.49 – 1.40 (m, 1.00H), 1.39 – 1.31 (m, 1.00H), 1.06 – 0.91 (m, 2.00H), 0.90 – 0.80 (m, 7.00H), 0.76 – 0.69 (m, 3.00H).  $^{13}\text{C}$  NMR (126 MHz,  $\text{CDCl}_3$ ) major isomer  $\delta$  206.86, 172.34, 169.56, 135.99, 130.14, 128.15, 127.17, 74.38, 64.81, 50.21, 46.91, 40.78, 34.45, 34.16, 31.29, 28.13, 27.80, 26.15, 25.29, 23.41, 21.90, 20.62, 16.26.

FT-IR (film): 3443, 2954, 1725, 1629, 1413, 1208, 701  $\text{cm}^{-1}$ .

HRMS (ESI-MS)  $m/z$   $[\text{M}+\text{H}]^+$  calcd for  $\text{C}_{25}\text{H}_{36}\text{NO}_4$ : 414.2639, found: 414.2637.

$[\alpha]^{25}_{\text{D}} = +14.3$  ( $c$  1.0,  $\text{CH}_2\text{Cl}_2$ ); 98:2 dr from (*S, R*)-L1.

$[\alpha]^{25}_{\text{D}} = -79.8$  ( $c$  1.0,  $\text{CH}_2\text{Cl}_2$ ); 2:98 dr from (*R, S*)-L1.

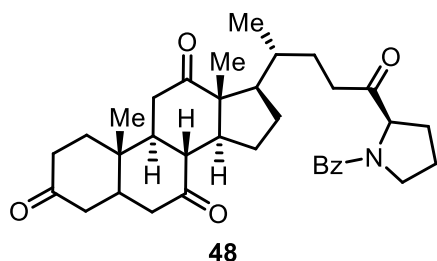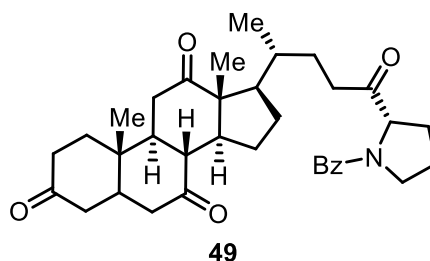

**(8R,9S,10S,13R,14S,17R)-17-((R)-5-((R)-1-Benzoylpyrrolidin-2-yl)-5-oxopentan-2-yl)-10,13-dimethyldodecahydro-3H-cyclopenta[a]phenanthrene-3,7,12(2H,4H)-trione (48, from (S, R)-L1).** The title compound was synthesized according to **GP-B** from (4R)-4-((8R,9S,10S,13R,14S,17R)-10,13-dimethyl-3,7,12-trioxohexadecahydro-1H-cyclopenta[a]phenanthren-17-yl)pentanoic acid and *N*-Bz-pyrrolidine. The product was purified by preparative TLC on silica gel (3:2 EtOAc/Petroleum ether). White solid.

(*S, R*)-**L1**: 70.4 mg, 63% yield, 98:2 dr; (*R, S*)-**L1**: 69.5 mg, 62% yield, 3:97 dr.

HPLC analysis: The dr was determined via HPLC on a CHIRALPAK AD-3 column (40.0% 2-PrOH in hexanes, 0.8 mL/min); retention times for compound obtained using (*S, R*)-**L1**: 18.9 min (major), 25.9 min (minor).

NMR data for the product **48**:

$^1\text{H}$  NMR (500 MHz,  $\text{CDCl}_3$ ) (83:17 mixture of rotamers)  $\delta$  7.61 – 7.47 (m, 1.66H), 7.45 – 7.26 (m, 3.34H), 4.86 – 4.63 (m, 0.83H), 4.47 – 4.42 (m, 0.17H), 3.84 – 3.70 (m, 0.34H), 3.65 – 3.57 (m, 0.83H), 3.57 – 3.48 (m, 0.83H), 2.94 – 2.78 (m, 3.00H), 2.77 – 2.48 (m, 1.66H), 2.36 – 2.17 (m, 7.00H), 2.17 – 2.06 (m, 2.34H), 2.05 – 1.79 (m, 9.00H), 1.64 – 1.55 (m, 1.00H), 1.44 – 1.27 (m, 5.83H), 1.27 – 1.22 (m, 1.17H), 1.05 (s, 2.49H), 1.00 (s, 0.51H), 0.83 (d,  $J$  = 6.6 Hz, 2.49H), 0.68 (d,  $J$  = 6.6 Hz, 0.51H).  $^{13}\text{C}$  NMR (101 MHz,  $\text{CDCl}_3$ ) major isomer  $\delta$  211.95, 209.02, 208.94, 208.57, 169.53, 136.18, 130.11, 128.20, 127.20, 64.80, 56.88, 51.72, 50.19, 48.95, 46.78, 45.67, 45.52, 44.92, 42.74, 38.59, 36.84, 36.42, 35.95, 35.23, 35.19, 28.66, 28.39, 27.45, 25.40, 25.10, 21.84, 18.80, 11.84.

NMR data for the product **49**:

$^1\text{H}$  NMR (500 MHz,  $\text{CDCl}_3$ ) (83:17 mixture of rotamers)  $\delta$  7.61 – 7.45 (m, 1.66H), 7.45 – 7.27 (m, 3.17H), 7.26 – 7.20 (m, 0.17H), 4.83 – 4.64 (m, 0.83H), 4.45 (d,  $J$  = 8.8 Hz, 0.17H), 3.84 – 3.71 (m, 0.34H), 3.68 – 3.56 (m, 0.83H), 3.56 – 3.45 (m, 0.83H), 2.93 – 2.81 (m, 2.66H), 2.66 – 2.61 (m, 1.34H), 2.40 – 2.06 (m, 9.00H), 2.06 – 1.51 (m, 10.83H), 1.43 – 1.16 (m, 7.17H), 1.06 (s, 2.49H), 1.03 (s, 0.51H), 0.85 (d,  $J$  = 5.6 Hz, 2.49H), 0.63 (d,  $J$  = 5.6 Hz, 0.51H).  $^{13}\text{C}$  NMR (126 MHz,  $\text{CDCl}_3$ ) major isomer  $\delta$  212.05, 209.03, 208.68, 169.48, 136.16, 130.12, 128.20, 127.23, 64.82, 56.89, 51.77, 50.19, 48.97, 46.80, 45.71, 45.55, 44.94, 42.75, 38.60, 37.10, 36.44, 35.97, 35.31, 35.23, 28.66, 28.50, 27.55, 25.43, 25.11, 21.86, 18.82, 11.86.

FT-IR (film): 2963, 2877, 1712, 1627, 1417, 732  $\text{cm}^{-1}$ .

HRMS (ESI-MS)  $m/z$   $[\text{M}+\text{H}]^+$  calcd for  $\text{C}_{35}\text{H}_{46}\text{NO}_5$ : 560.3371, found: 560.3369.

$[\alpha]^{25}_{\text{D}} = +48.4$  ( $c$  1.0,  $\text{CH}_2\text{Cl}_2$ ); 98:2 dr from (*S, R*)-**L1**.

$[\alpha]^{25}_{\text{D}} = -14.0$  ( $c$  1.0,  $\text{CH}_2\text{Cl}_2$ ); 3:97 dr from (*R, S*)-**L1**.

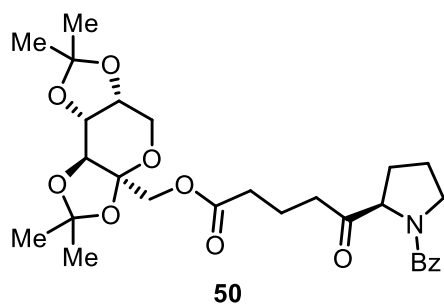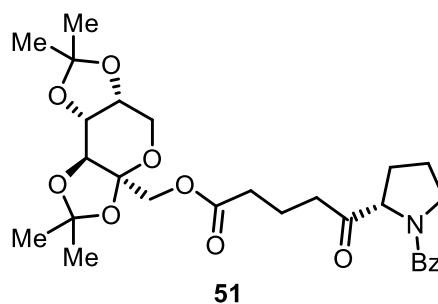

**((3a*S*,5a*R*,8a*R*,8b*S*)-2,2,7,7-Tetramethyltetrahydro-3a*H*-bis([1,3]dioxolo)[4,5-*b*:4',5'-*d*]pyran-3a-yl)methyl 5-((*R*)-1-benzoylpyrrolidin-2-yl)-5-oxopentanoate (50, from (*S*, *R*)-L1).** The title compound was synthesized according to **GP-B** from 5-oxo-5-(((3a*S*,5a*R*,8a*R*,8b*S*)-2,2,7,7-tetramethyltetrahydro-3a*H*-bis([1,3]dioxolo)[4,5-*b*:4',5'-*d*]pyran-3a-yl)methoxy)pentanoic acid and *N*-Bz-pyrrolidine. The product was purified by preparative TLC on silica gel (1:4 Acetone/Petroleum ether). Yellow oil.

(*S*, *R*)-L1: 76.2 mg, 72% yield, 97:3 dr; (*R*, *S*)-L1: 82.4 mg, 78% yield, 2:98 dr.

HPLC analysis: The dr was determined via HPLC on a CHIRALPAK AD-3 column (25.0% 2-PrOH in hexanes, 0.8 mL/min); retention times for compound obtained using (*S*, *R*)-L1: 12.1 min (major), 21.3 min (minor).

NMR data for the product **50**:

<sup>1</sup>H NMR (500 MHz, CDCl<sub>3</sub>) (80:20 mixture of rotamers) δ 7.54 – 7.49 (m, 1.60H), 7.44 – 7.26 (m, 3.40H), 4.76 – 4.63 (m, 0.80H), 4.56 (dd, *J* = 7.8, 2.7 Hz, 1.00H), 4.48 – 4.31 (m, 1.20H), 4.30 – 4.23 (m, 1.00H), 4.20 (dd, *J* = 8.0, 1.8 Hz, 1.00H), 4.04 – 3.93 (m, 1.00H), 3.91 – 3.81 (m, 1.00H), 3.80 – 3.64 (m, 1.40H), 3.62 – 3.56 (m, 0.80H), 3.54 – 3.48 (m, 0.80H), 2.80 – 2.71 (m, 0.80H), 2.68 – 2.58 (m, 0.80H), 2.41 (t, *J* = 7.2 Hz, 1.80H), 2.35 – 2.26 (m, 0.20H), 2.26 – 2.16 (m, 1.00H), 2.14 – 2.04 (m, 0.20H), 2.00 – 1.89 (m, 3.00H), 1.89 – 1.75 (m, 2.20H), 1.49 (s, 3.00H), 1.44 (s, 3.00H), 1.36 (s, 3.00H), 1.30 (s, 3.00H). <sup>13</sup>C NMR (126 MHz, CDCl<sub>3</sub>) δ 207.91, 172.38, 171.94, 170.22, 169.46, 135.96, 130.11, 129.46, 128.29, 128.14, 127.15, 126.46, 109.00, 108.61, 101.42, 101.34, 70.68, 70.46, 70.39, 69.97, 66.81, 65.18, 65.00, 64.76, 61.15, 50.13, 46.68, 38.50, 37.79, 32.83, 32.45, 30.03, 28.25, 26.36, 25.79, 25.36, 25.15, 23.97, 22.49, 18.33, 18.10.

NMR data for the product **51**:

<sup>1</sup>H NMR (500 MHz, CDCl<sub>3</sub>) (80:20 mixture of rotamers) δ 7.56 – 7.49 (m, 1.60H), 7.43 – 7.24 (m, 3.40H), 4.75 – 4.63 (m, 0.80H), 4.56 (dd, *J* = 7.9, 2.7 Hz, 1.00H), 4.45 – 4.29 (m, 1.20H), 4.29 – 4.22 (m, 1.00H), 4.20 (dd, *J* = 8.0, 1.8 Hz, 1.00H), 4.04 – 3.93 (m, 1.00H), 3.90 – 3.82 (m, 1.00H), 3.80 – 3.64 (m, 1.40H), 3.63 – 3.56 (m, 0.80H), 3.54 – 3.47 (m, 0.80H), 2.81 – 2.69 (m, 0.80H), 2.68 – 2.60 (m, 0.80H), 2.47 – 2.37 (m, 1.60H), 2.36 – 2.27 (m, 0.20H), 2.25 – 2.15 (m, 1.00H), 2.14 – 2.04 (m, 0.20H), 2.03 – 1.90 (m, 3.00H), 1.90 – 1.78 (m, 2.20H), 1.50 (s, 3.00H), 1.44 (s, 3.00H), 1.37 (s, 3.00H), 1.30 (s, 3.00H). <sup>13</sup>C NMR (126 MHz, CDCl<sub>3</sub>) δ 207.89, 172.37, 169.46, 135.97, 130.11, 129.49, 128.31, 128.14, 127.15, 126.44, 108.99, 108.63, 101.41, 70.68, 70.45, 70.39, 69.97, 66.82, 65.21, 64.98, 64.76, 61.14, 50.13, 46.67, 38.48, 37.79, 32.84, 32.50, 30.02, 28.26, 26.36, 25.78, 25.36, 25.17, 23.97, 22.48, 18.32, 18.11.

FT-IR (film): 3463, 2988, 1740, 1628, 1416, 1382, 1252, 1071, 731 cm<sup>-1</sup>.

HRMS (ESI-MS) *m/z* [M+H]<sup>+</sup> calcd for C<sub>28</sub>H<sub>38</sub>NO<sub>9</sub>: 532.2541, found: 532.2542.

[α]<sub>D</sub><sup>25</sup> = +13.7 (*c* 1.0, CH<sub>2</sub>Cl<sub>2</sub>); 97:3 dr from (*S*, *R*)-L1.

[α]<sub>D</sub><sup>25</sup> = -50.5 (*c* 1.0, CH<sub>2</sub>Cl<sub>2</sub>); 2:98 dr from (*R*, *S*)-L1.

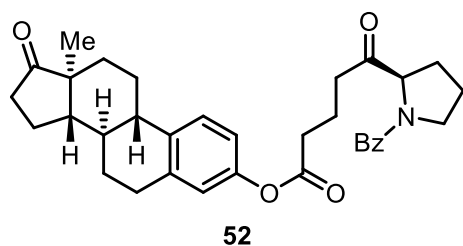

52

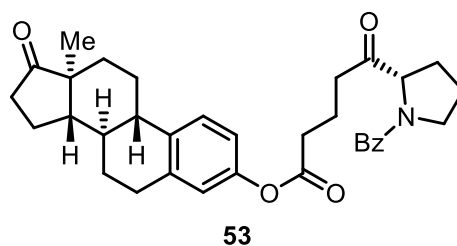

53

**(8*R*,9*S*,13*S*,14*S*)-13-Methyl-17-oxo-7,8,9,11,12,13,14,15,16,17-decahydro-6*H*-cyclopenta[*a*]phenanthren-3-yl 5-((*R*)-1-benzoylpyrrolidin-2-yl)-5-oxopentanoate (52, from (*S*, *R*)-L1).** The title compound was synthesized according to **GP-B** from 5-(((8*R*,9*S*,13*S*,14*S*)-13-methyl-17-oxo-7,8,9,11,12,13,14,15,16,17-decahydro-6*H*-cyclopenta[*a*]phenanthren-3-yl)oxy)-5-oxopentanoic acid and *N*-Bz-pyrrolidine. The product was purified by preparative TLC on silica gel (1:4 Acetone/Petroleum ether). White solid.

(*S*, *R*)-L1: 48.8 mg, 45% yield, 99:1 dr; (*R*, *S*)-L1: 50.7 mg, 47% yield, 2:98 dr.

HPLC analysis: The dr was determined via HPLC on a CHIRALPAK AD-3 column (40.0% 2-PrOH in hexanes, 0.8 mL/min); retention times for compound obtained using (*S*, *R*)-L1: 15.0 min (major), 30.5 min (minor).

NMR data for the product **52**:

<sup>1</sup>H NMR (500 MHz, CDCl<sub>3</sub>) (85:15 mixture of rotamers) δ 7.63 – 7.53 (m, 1.70H), 7.48 – 7.27 (m, 4.00H), 7.17 – 6.95 (m, 0.30H), 6.89 – 6.76 (m, 2.00H), 4.76 (dd, *J* = 8.5, 5.9 Hz, 0.85H), 4.54 – 4.41 (m, 0.15H), 3.88 – 3.75 (m, 0.30H), 3.68 – 3.61 (m, 0.85H), 3.60 – 3.51 (m, 0.85H), 3.00 – 2.82 (m, 2.85H), 2.79 – 2.69 (m, 1.00H), 2.67 – 2.59 (m, 1.70H), 2.56 – 2.46 (m, 1.15H), 2.44 – 2.36 (m, 1.15H), 2.33 – 2.22 (m, 2.15H), 2.20 – 2.04 (m, 3.85H), 2.04 – 1.94 (m, 3.15H), 1.93 – 1.86 (m, 2.15H), 1.67 – 1.41 (m, 5.85H), 0.97 – 0.86 (m, 3.00H). <sup>13</sup>C NMR (126 MHz, CDCl<sub>3</sub>) major isomer δ 208.02, 172.03, 169.59, 148.49, 137.88, 137.21, 135.96, 130.19, 128.21, 127.20, 126.24, 121.50, 118.69, 64.86, 50.38, 50.19, 47.86, 44.07, 38.49, 37.94, 35.77, 33.17, 31.49, 29.29, 28.32, 26.26, 25.68, 25.43, 21.51, 18.54, 13.76.

NMR data for the product **53**:

<sup>1</sup>H NMR (500 MHz, CDCl<sub>3</sub>) (85:15 mixture of rotamers) δ 7.62 – 7.53 (m, 1.70H), 7.47 – 7.27 (m, 4.00H), 7.09 – 6.73 (m, 2.30H), 4.75 (dd, *J* = 8.5, 5.9 Hz, 0.85H), 4.54 – 4.42 (m, 0.15H), 3.85 – 3.75 (m, 0.30H), 3.69 – 3.61 (m, 0.85H), 3.60 – 3.51 (m, 0.85H), 2.96 – 2.82 (m, 2.85H), 2.79 – 2.70 (m, 1.00H), 2.67 – 2.60 (m, 1.70H), 2.55 – 2.47 (m, 1.15H), 2.44 – 2.37 (m, 1.15H), 2.32 – 2.23 (m, 2.15H), 2.20 – 2.05 (m, 3.85H), 2.04 – 1.95 (m, 3.15H), 1.92 – 1.85 (m, 2.15H), 1.67 – 1.42 (m, 5.85H), 0.96 – 0.79 (m, 3.00H). <sup>13</sup>C NMR (126 MHz, CDCl<sub>3</sub>) major isomer δ 208.00, 172.02, 169.57, 148.48, 137.86, 137.20, 135.95, 130.17, 128.19, 127.18, 126.23, 121.49, 118.67, 64.85, 50.36, 50.18, 47.85, 44.06, 38.48, 37.93, 35.76, 33.15, 31.48, 29.28, 28.31, 26.25, 25.67, 25.42, 21.49, 18.53, 13.74.

FT-IR (film): 3450, 2922, 1735, 1626, 1413, 1150, 796 cm<sup>-1</sup>.

HRMS (ESI-MS) *m/z* [M+H]<sup>+</sup> calcd for C<sub>34</sub>H<sub>40</sub>NO<sub>5</sub>: 542.2901, found: 542.2900.

[α]<sub>D</sub><sup>25</sup> = +109.7 (*c* 1.0, CH<sub>2</sub>Cl<sub>2</sub>); 99:1 dr from (*S*, *R*)-L1.

[α]<sub>D</sub><sup>25</sup> = +43.9 (*c* 1.0, CH<sub>2</sub>Cl<sub>2</sub>); 2:98 dr from (*R*, *S*)-L1.

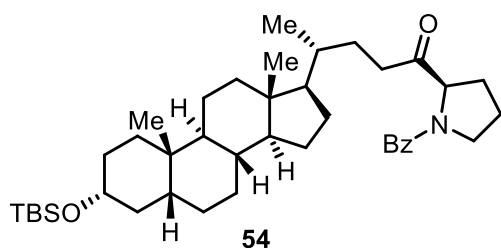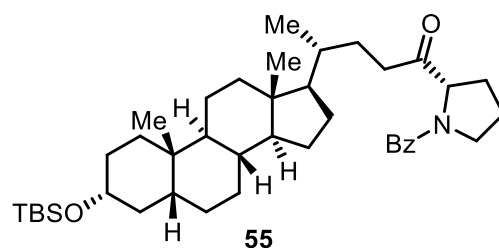

**(4R)-1-((R)-1-Benzoylpyrrolidin-2-yl)-4-((3R,8R,9S,10S,13R,14S,17R)-3-((tert-butyl)dimethylsilyl)oxy)-10,13-dimethylhexadecahydro-1H-cyclopenta[a]phenanthren-17-yl)pentan-1-one (54, from (S, R)-L1).** The title compound was synthesized according to GP-B from (4R)-4-((3R,8R,9S,10S,13R,14S,17R)-3-((tert-butyl)dimethylsilyl)oxy)-10,13-dimethylhexadecahydro-1H-cyclopenta[a]phenanthren-17-yl)pentanoic acid and N-Bz-pyrrolidine. The product was purified by preparative TLC on silica gel (1:5 EtOAc/Petroleum ether). White solid.

(S, R)-L1: 61.8 mg, 48% yield, 96:4 dr; (R, S)-L1: 60.4 mg, 47% yield, 3:97 dr.

HPLC analysis: The dr was determined via HPLC on a CHIRALPAK AD-3 column (5.0% 2-PrOH in hexanes, 1.0 mL/min); retention times for compound obtained using (S, R)-L1: 5.8 min (major), 7.6 min (minor).

NMR data for the product 54:

$^1\text{H}$  NMR (500 MHz,  $\text{CDCl}_3$ ) (81:19 mixture of rotamers)  $\delta$  7.59 – 7.49 (m, 1.62H), 7.46 – 7.27 (m, 3.38H), 4.84 – 4.66 (m, 0.81H), 4.53 – 4.40 (m, 0.19H), 3.84 – 3.73 (m, 0.38H), 3.68 – 3.50 (m, 2.62H), 2.77 – 2.41 (m, 1.62H), 2.31 – 2.05 (m, 1.19H), 1.99 – 1.90 (m, 1.81H), 1.89 – 1.70 (m, 6.81H), 1.67 – 1.62 (m, 1.00H), 1.58 – 1.51 (m, 2.00H), 1.45 – 1.30 (m, 8.57H), 1.29 – 1.18 (m, 3.19H), 1.17 – 1.07 (m, 2.81H), 1.07 – 0.94 (m, 3.00H), 0.94 – 0.90 (m, 3.00H), 0.90 – 0.85 (m, 12.00H), 0.68 – 0.55 (m, 3.00H), 0.08 – 0.02 (m, 6.00H).  $^{13}\text{C}$  NMR (126 MHz,  $\text{CDCl}_3$ ) major isomer  $\delta$  209.26, 169.52, 136.24, 130.12, 128.22, 127.26, 72.83, 64.77, 56.37, 56.09, 50.22, 42.71, 42.30, 40.20, 40.14, 37.05, 36.92, 35.87, 35.58, 35.30, 34.58, 31.02, 29.27, 28.41, 28.20, 27.30, 26.39, 25.97, 25.42, 24.21, 23.38, 20.80, 18.46, 18.32, 12.03, -4.60.

NMR data for the product 55:

$^1\text{H}$  NMR (500 MHz,  $\text{CDCl}_3$ ) (81:19 mixture of rotamers)  $\delta$  7.60 – 7.51 (m, 1.62H), 7.44 – 7.37 (m, 2.38H), 7.37 – 7.26 (m, 1.00H), 4.82 – 4.70 (m, 0.81H), 4.48 – 4.42 (m, 0.19H), 3.85 – 3.73 (m, 0.38H), 3.66 – 3.50 (m, 2.62H), 2.70 – 2.47 (m, 1.62H), 2.30 – 2.16 (m, 1.19H), 2.02 – 1.91 (m, 1.81H), 1.91 – 1.62 (m, 8.39H), 1.58 – 1.51 (m, 2.00H), 1.47 – 1.29 (m, 9.00H), 1.24 – 1.06 (m, 5.00H), 1.06 – 0.95 (m, 3.00H), 0.94 – 0.90 (m, 3.00H), 0.90 – 0.85 (m, 12.00H), 0.69 – 0.58 (m, 3.00H), 0.08 – 0.01 (m, 6.00H).  $^{13}\text{C}$  NMR (126 MHz,  $\text{CDCl}_3$ ) major isomer  $\delta$  209.38, 169.51, 136.22, 130.12, 128.21, 127.26, 72.82, 64.77, 56.39, 56.04, 50.21, 42.71, 42.29, 40.21, 40.15, 36.98, 36.92, 35.85, 35.57, 35.27, 34.57, 31.01, 29.28, 28.52, 28.20, 27.29, 26.38, 25.96, 25.45, 24.20, 23.37, 20.80, 18.48, 18.31, 12.02, -4.61.

FT-IR (film): 2928, 2861, 1724, 1631, 1412, 1079, 836, 774  $\text{cm}^{-1}$ .

HRMS (ESI-MS)  $m/z$   $[\text{M}+\text{H}]^+$  calcd for  $\text{C}_{41}\text{H}_{66}\text{NO}_3\text{Si}$ : 648.4806, found: 648.4807.

$[\alpha]_D^{25} = +47.1$  (c 1.0,  $\text{CH}_2\text{Cl}_2$ ); 96:4 dr from (S, R)-L1.

$[\alpha]_D^{25} = -1.5$  (c 1.0,  $\text{CH}_2\text{Cl}_2$ ); 3:97 dr from (R, S)-L1.

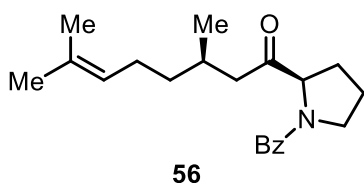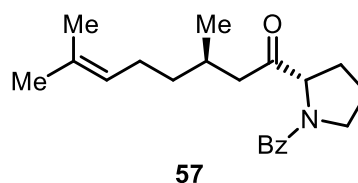

**(R)-1-((R)-1-Benzoylpyrrolidin-2-yl)-3,7-dimethyloct-6-en-1-one (56, from (S, R)-L1).** The title compound was synthesized according to **GP-B** from (R)-3,7-dimethyloct-6-enoic acid and N-Bz-pyrrolidine. The product was purified by preparative TLC on silica gel (1:6 Acetone/Petroleum ether). Yellow oil.

(S, R)-L1: 35.0 mg, 53% yield, 97:3 dr; (R, S)-L1: 33.8 mg, 52% yield, 3:97 dr.

HPLC analysis: The dr was determined via HPLC on a CHIRALPAK AD-3 column (15% 2-PrOH in hexanes, 1.0 mL/min); retention times for compound obtained using (S, R)-L1: 5.8 min (major), 9.9 min (minor).

NMR data for the product **56**:

$^1\text{H}$  NMR (500 MHz,  $\text{CDCl}_3$ ) (84:16 mixture of rotamers)  $\delta$  7.57 – 7.52 (m, 1.68H), 7.42 – 7.36 (m, 2.68H), 7.33 – 7.30 (m, 0.64H), 5.20 – 5.05 (m, 0.84H), 5.00 (t,  $J$  = 7.4 Hz, 0.16H), 4.72 (dd,  $J$  = 8.5, 6.1 Hz, 0.84H), 4.41 (dd,  $J$  = 8.9, 2.9 Hz, 0.16H), 3.76 (t,  $J$  = 6.8 Hz, 0.32H), 3.66 – 3.58 (m, 1.00H), 3.55 – 3.49 (m, 0.84H), 3.04 (s, 0.16H), 2.59 – 2.45 (m, 1.68H), 2.25 – 2.17 (m, 1.00H), 2.12 – 2.06 (m, 1.00H), 2.00 – 1.92 (m, 2.52H), 1.88 – 1.80 (m, 2.48H), 1.71 – 1.64 (m, 3.16H), 1.61 – 1.53 (m, 2.84H), 1.41 – 1.31 (m, 1.00H), 1.23 – 1.14 (m, 1.00H), 0.95 (d,  $J$  = 6.6 Hz, 2.52H), 0.59 (d,  $J$  = 6.6 Hz, 0.48H).  $^{13}\text{C}$  NMR (126 MHz,  $\text{CDCl}_3$ ) major isomer  $\delta$  208.26, 169.51, 136.20, 131.28, 130.08, 128.17, 127.20, 124.41, 65.12, 50.17, 47.45, 36.96, 28.19, 25.62, 25.46, 25.39, 19.67, 17.58.

NMR data for the product **57**:

$^1\text{H}$  NMR (500 MHz,  $\text{CDCl}_3$ ) (82:18 mixture of rotamers)  $\delta$  7.61 – 7.51 (m, 1.82H), 7.42 – 7.36 (m, 2.46H), 7.34 – 7.28 (m, 0.72H), 5.09 (t,  $J$  = 7.2 Hz, 0.82H), 4.99 (t,  $J$  = 7.2 Hz, 0.18H), 4.81 – 4.71 (m, 0.82H), 4.42 (d,  $J$  = 8.1 Hz, 0.18H), 3.82 – 3.72 (m, 0.36H), 3.68 – 3.57 (m, 1.00H), 3.56 – 3.48 (m, 0.82H), 3.04 (s, 0.18H), 2.72 – 2.59 (m, 0.82H), 2.41 – 2.32 (m, 0.82H), 2.28 – 2.17 (m, 1.00H), 2.16 – 2.07 (m, 1.00H), 2.02 – 1.92 (m, 2.54H), 1.88 – 1.80 (m, 2.46H), 1.73 – 1.63 (m, 3.18H), 1.63 – 1.50 (m, 2.82H), 1.42 – 1.31 (m, 1.00H), 1.25 – 1.18 (m, 1.00H), 0.92 (d,  $J$  = 6.6 Hz, 2.46H), 0.68 (d,  $J$  = 6.6 Hz, 0.54H).  $^{13}\text{C}$  NMR (126 MHz,  $\text{CDCl}_3$ ) major isomer  $\delta$  208.06, 169.48, 136.23, 131.30, 130.06, 128.17, 127.19, 124.40, 64.84, 50.18, 47.59, 36.96, 28.16, 28.03, 25.63, 25.48, 25.28, 19.68, 17.59.

FT-IR (film): 2962, 2925, 1721, 1630, 1412, 1056, 701  $\text{cm}^{-1}$ .

HRMS (ESI-MS)  $m/z$   $[\text{M}+\text{H}]^+$  calcd for  $\text{C}_{21}\text{H}_{30}\text{NO}_2$ : 328.2271, found: 328.2268.

$[\alpha]^{25}_{\text{D}} = +65.8$  (c 1.0,  $\text{CH}_2\text{Cl}_2$ ); 97:3 dr from (S, R)-L1.

$[\alpha]^{25}_{\text{D}} = -40.8$  (c 1.0,  $\text{CH}_2\text{Cl}_2$ ); 3:97 dr from (R, S)-L1.

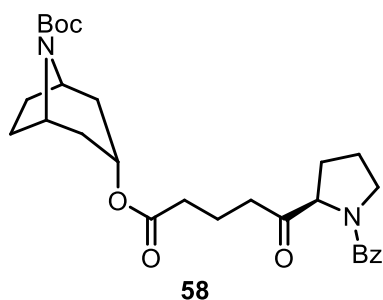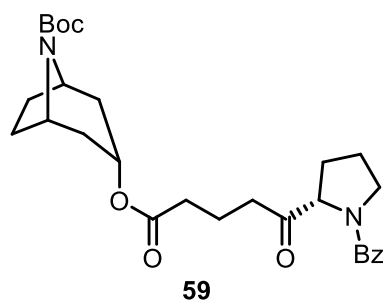

**tert-Butyl (1R,3r,5S)-3-((5-((R)-1-benzoylpyrrolidin-2-yl)-5-oxopentanoyl)oxy)-8-azabicyclo[3.2.1]octane-8-carboxylate (58, from (S, R)-L1).** The title compound was synthesized according to **GP-B** from 5-(((1R,3r,5S)-8-(tert-butoxycarbonyl)-8-azabicyclo[3.2.1]octan-3-yl)oxy)-5-oxopentanoic acid and *N*-Bz-pyrrolidine. The product was purified by preparative TLC on silica gel (1:4 Acetone/Petroleum ether). Yellow oil.

(*S, R*)-**L1**: 65.5 mg, 66% yield, 99:1 dr; (*R, S*)-**L1**: 61.8 mg, 62% yield, 1:99 dr.

HPLC analysis: The dr was determined via HPLC on a CHIRALCEL OD-3 column (25.0% 2-PrOH in hexanes, 0.8 mL/min); retention times for compound obtained using (*S, R*)-**L1**: 13.4 min (major), 15.1 min (minor).

NMR data for the product **58**:

<sup>1</sup>H NMR (500 MHz, CDCl<sub>3</sub>) (87:13 mixture of rotamers) δ 7.56 – 7.50 (m, 1.74H), 7.44 – 7.34 (m, 2.74H), 7.33 – 7.27 (m, 0.52H), 5.09 – 4.99 (m, 1.00H), 4.69 (dd, *J* = 8.5, 6.1 Hz, 0.87H), 4.43 (dd, *J* = 9.3, 2.7 Hz, 0.13H), 4.17 (brs, 1.00H), 4.10 (brs, 1.00H), 3.79 – 3.72 (m, 0.26H), 3.63 – 3.57 (m, 0.87H), 3.55 – 3.48 (m, 0.87H), 2.79 – 2.71 (m, 0.87H), 2.66 – 2.58 (m, 0.87H), 2.41 – 2.28 (m, 2.00H), 2.26 – 2.16 (m, 1.26H), 2.14 – 2.08 (m, 1.00H), 2.06 – 2.02 (m, 1.00H), 1.98 – 1.88 (m, 7.00H), 1.86 – 1.79 (m, 2.00H), 1.72 – 1.63 (m, 2.00H), 1.42 (s, 9.00H). <sup>13</sup>C NMR (126 MHz, CDCl<sub>3</sub>) major isomer δ 208.02, 172.29, 169.51, 153.22, 135.88, 130.19, 128.16, 127.16, 79.19, 67.76, 64.80, 52.56, 51.82, 50.16, 38.57, 35.72, 35.02, 33.65, 28.38, 28.31, 28.21, 27.53, 25.42, 18.40.

NMR data for the product **59**:

<sup>1</sup>H NMR (500 MHz, CDCl<sub>3</sub>) (88:12 mixture of rotamers) δ 7.55 – 7.48 (m, 1.76H), 7.42 – 7.26 (m, 3.24H), 5.08 – 4.98 (m, 1.00H), 4.68 (dd, *J* = 8.4, 6.0 Hz, 0.88H), 4.42 (d, *J* = 8.6 Hz, 0.12H), 4.16 (brs, 1.00H), 4.10 (brs, 1.00H), 3.78 – 3.71 (m, 0.24H), 3.62 – 3.56 (m, 0.88H), 3.55 – 3.47 (m, 0.88H), 2.79 – 2.69 (m, 0.88H), 2.67 – 2.57 (m, 0.88H), 2.39 – 2.27 (m, 2.00H), 2.26 – 2.16 (m, 1.24H), 2.11 – 2.02 (m, 2.00H), 1.98 – 1.87 (m, 7.00H), 1.86 – 1.79 (m, 2.00H), 1.67 (t, *J* = 13.5 Hz, 2.00H), 1.42 (s, 9.00H). <sup>13</sup>C NMR (126 MHz, CDCl<sub>3</sub>) major isomer δ 208.00, 172.26, 169.48, 153.19, 135.86, 130.16, 128.14, 127.13, 79.16, 67.73, 64.78, 52.54, 51.74, 50.14, 38.53, 35.70, 35.02, 33.62, 28.36, 28.29, 28.16, 27.55, 25.39, 18.37.

FT-IR (film): 3448, 1629, 1408, 1162, 1032 cm<sup>-1</sup>.

HRMS (ESI-MS) *m/z* [M+H]<sup>+</sup> calcd for C<sub>28</sub>H<sub>39</sub>N<sub>2</sub>O<sub>6</sub>: 499.2803, found: 499.2801.

[α]<sub>D</sub><sup>25</sup> = +35.4 (*c* 1.0, CH<sub>2</sub>Cl<sub>2</sub>); 99:1 dr from (*S, R*)-**L1**.

[α]<sub>D</sub><sup>25</sup> = -37.5 (*c* 1.0, CH<sub>2</sub>Cl<sub>2</sub>); 1:99 dr from (*R, S*)-**L1**.

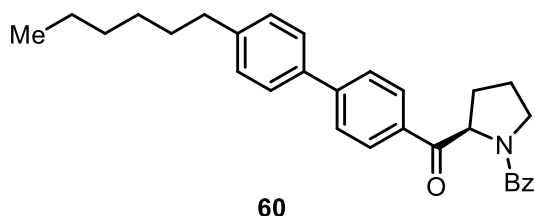

**(R)-(1-Benzoylpyrrolidin-2-yl)(4'-hexyl-[1,1'-biphenyl]-4-yl)methanone (60**, from (*S, R*)-**L2**). The title compound was synthesized according to **GP-B** from 4'-hexyl-[1,1'-biphenyl]-4-carboxylic acid and *N*-Bz-pyrrolidine. The product was purified by preparative TLC on silica gel (2:3 EtOAc/Petroleum ether). White solid.

(*S, R*)-**L2**: 49.0 mg, 56% yield, 95% ee; (*R, S*)-**L2**: 51.4 mg, 58% yield, 94% ee.

HPLC analysis: The ee was determined via HPLC on a CHIRALCEL OD-3 column (15.0% 2-PrOH in hexanes, 1.0 mL/min); retention times for compound obtained using (*S, R*)-**L2**: 11.7 min (major), 23.3 min (minor).

$^1\text{H}$  NMR (500 MHz,  $\text{CDCl}_3$ ) (83:17 mixture of rotamers)  $\delta$  8.13 (d,  $J$  = 8.1 Hz, 1.66H), 7.74 – 7.61 (m, 3.83H), 7.60 – 7.53 (m, 2.00H), 7.50 (d,  $J$  = 7.9 Hz, 0.51H), 7.45 – 7.39 (m, 2.49H), 7.36 – 7.33 (m, 0.34H), 7.29 (d,  $J$  = 8.0 Hz, 1.66H), 7.24 – 7.19 (m, 0.51H), 5.75 (dd,  $J$  = 8.8, 4.9 Hz, 0.83H), 5.31 (d,  $J$  = 8.8 Hz, 0.17H), 3.96 – 3.87 (m, 0.34H), 3.79 – 3.71 (m, 0.83H), 3.67 – 3.59 (m, 0.83H), 2.71 – 2.61 (m, 2.00H), 2.46 – 2.30 (m, 1.00H), 2.08 – 1.92 (m, 3.00H), 1.71 – 1.62 (m, 2.00H), 1.42 – 1.29 (m, 6.00H), 0.95 – 0.87 (m, 3.00H).  $^{13}\text{C}$  NMR (126 MHz,  $\text{CDCl}_3$ )  $\delta$  197.76, 197.23, 170.35, 169.20, 146.04, 145.89, 143.47, 143.22, 137.32, 137.10, 136.66, 136.37, 133.72, 132.54, 129.96, 129.41, 129.07, 128.98, 128.94, 128.55, 128.25, 128.13, 127.28, 127.04, 126.99, 126.94, 126.47, 63.94, 61.26, 50.07, 46.73, 35.57, 31.64, 31.30, 31.27, 31.22, 29.46, 28.93, 25.35, 22.52, 22.37, 14.01.

FT-IR (film): 3448, 2927, 1690, 1628, 1602, 1418, 1227, 1003, 700  $\text{cm}^{-1}$ .

HRMS (ESI-MS)  $m/z$   $[\text{M}+\text{H}]^+$  calcd for  $\text{C}_{30}\text{H}_{34}\text{NO}_2$ : 440.2584, found: 440.2582.

$[\alpha]^{25}_{\text{D}} = -14.4$  (c 1.0,  $\text{CH}_2\text{Cl}_2$ ); 95% ee from (*S, R*)-**L2**.

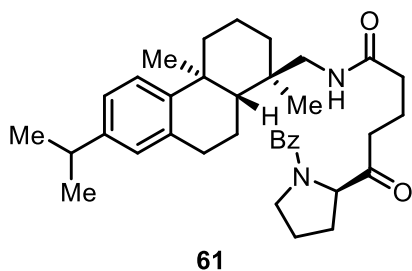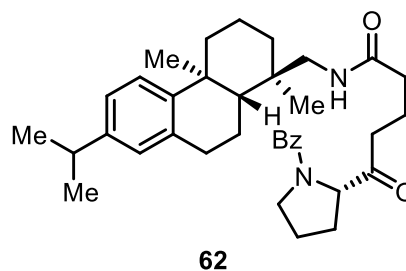

**5-((R)-1-Benzoylpyrrolidin-2-yl)-N-(((1R,4aS,10aR)-7-isopropyl-1,4a-dimethyl-1,2,3,4,4a,9,10,10a-octahydrophenanthren-1-yl)methyl)-5-oxopentanamide (61, from (S, R)-L1).** The title compound was synthesized according to **GP-B** from 5-((((1R,4aS,10aR)-7-isopropyl-1,4a-dimethyl-1,2,3,4,4a,9,10,10a-octahydrophenanthren-1-yl)methyl)amino)-5-oxopentanoic acid and N-Bz-pyrrolidine. The product was purified by preparative TLC on silica gel (1:3 Acetone/Petroleum ether). Yellow oil.

(S, R)-L1: 40.5 mg, 36% yield, 99:1 dr; (R, S)-L1: 39.1 mg, 35% yield, 1:99 dr.

HPLC analysis: The dr was determined via HPLC on a CHIRALCEL OD-3 column (15.0% 2-PrOH in hexanes, 1.0 mL/min); retention times for compound obtained using (S, R)-L1: 7.4 min (major), 10.4 min (minor).

NMR data for the product **61**:

$^1\text{H}$  NMR (500 MHz,  $\text{CDCl}_3$ ) (83:17 mixture of rotamers)  $\delta$  7.61 – 7.34 (m, 4.32H), 7.33 – 7.26 (m, 1.00H), 7.19 – 7.11 (m, 1.00H), 7.01 – 6.94 (m, 1.00H), 6.90 – 6.82 (m, 1.00H), 6.68 – 6.59 (m, 0.68H), 4.39 (t,  $J$  = 7.2 Hz, 0.83H), 3.69 – 3.61 (m, 0.17H), 3.60 – 3.51 (m, 0.83H), 3.48 – 3.42 (m, 1.34H), 2.88 – 2.76 (m, 3.34H), 2.75 – 2.59 (m, 0.83H), 2.39 – 2.14 (m, 3.83H), 2.13 – 1.80 (m, 6.00H), 1.79 – 1.48 (m, 5.83H), 1.46 – 1.15 (m, 13.00H), 0.93 – 0.85 (m, 3.00H).  $^{13}\text{C}$  NMR (126 MHz,  $\text{CDCl}_3$ ) major isomer  $\delta$  208.57, 173.22, 169.14, 147.42, 145.43, 135.84, 134.91, 130.22, 128.26, 127.07, 126.83, 123.97, 123.63, 65.45, 50.19, 49.68, 44.37, 38.22, 38.11, 37.27, 37.14, 35.79, 35.15, 33.37, 29.95, 28.19, 25.54, 25.18, 23.94, 20.09, 18.94, 18.77, 18.66.

NMR data for the product **62**:

$^1\text{H}$  NMR (500 MHz,  $\text{CDCl}_3$ ) (81:19 mixture of rotamers)  $\delta$  7.60 – 7.47 (m, 1.81H), 7.47 – 7.26 (m, 3.19H), 7.18 – 7.12 (m, 1.00H), 7.07 – 6.79 (m, 2.19H), 6.60 (t,  $J$  = 6.5 Hz, 0.81H), 4.58 (dd,  $J$  = 8.6, 5.8 Hz, 0.81H), 3.81 – 3.72 (m, 0.19H), 3.67 – 3.51 (m, 1.00H), 3.46 – 3.38 (m, 0.81H), 3.24 – 3.05 (m, 1.81H), 2.90 – 2.74 (m, 3.57H), 2.50 – 2.43 (m, 0.81H), 2.31 – 2.15 (m, 3.00H), 2.11 – 2.03 (m, 1.00H), 2.03 – 1.95 (m, 1.62H), 1.95 – 1.83 (m, 3.00H), 1.76 – 1.66 (m, 3.38H), 1.65 – 1.59 (m, 1.00H), 1.49 – 1.37 (m, 2.00H), 1.37 – 1.14 (m, 12.00H), 0.92 (s, 3.00H).  $^{13}\text{C}$  NMR (126 MHz,  $\text{CDCl}_3$ ) major isomer  $\delta$  208.69, 173.35, 169.33, 147.21, 145.34, 135.74, 134.84, 130.31, 128.24, 127.17, 126.82, 124.05, 123.67, 65.38, 50.15, 49.55, 44.88, 38.37, 38.12, 37.55, 37.38, 35.97, 35.24, 33.35, 29.99, 28.10, 25.32, 25.30, 23.98, 23.85, 20.35, 18.83, 18.58.

FT-IR (film): 3397, 2927, 1621, 1423, 1265, 734  $\text{cm}^{-1}$ .

HRMS (ESI-MS)  $m/z$   $[\text{M}+\text{H}]^+$  calcd for  $\text{C}_{36}\text{H}_{49}\text{N}_2\text{O}_3$ : 557.3738, found: 557.3737.

$[\alpha]_D^{25} = +13.5$  ( $c$  1.0,  $\text{CH}_2\text{Cl}_2$ ); 99:1 dr from (S, R)-L1.

$[\alpha]_D^{25} = +8.1$  ( $c$  1.0,  $\text{CH}_2\text{Cl}_2$ ); 1:99 dr from (R, S)-L1.

## 1.5 Synthetic Utility

### Concurrent rapid access to Taxol derivatives:

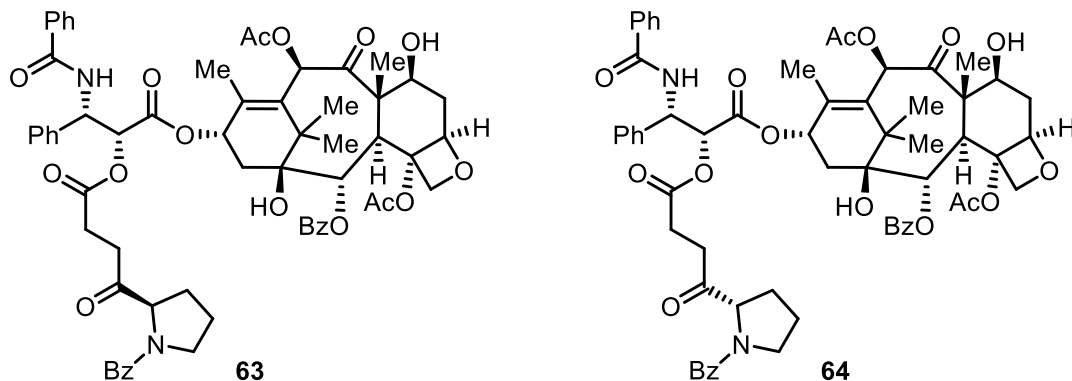

**(2a*R*,4*S*,4a*S*,6*R*,9*S*,11*S*,12*S*,12b*S*)-9-(((2*R*,3*S*)-3-Benzamido-2-((4-((*R*)-1-benzoylpyrrolidin-2-yl)-4-oxobutanoyl)oxy)-3-phenylpropanoyl)oxy)-12-(benzoyloxy)-4,11-dihydroxy-4a,8,13,13-tetramethyl-5-oxo-3,4,4a,5,6,9,10,11,12,12a-decahydro-1*H*-7,11-methanocyclodeca[3,4]benzo[1,2-*b*]oxete-6,12b(2a*H*)-diyl diacetate (63, from (*S*, *R*)-L1).** The title compound was synthesized according to **GP-B** from 4-(((1*S*,2*R*)-1-benzamido-3-(((2a*R*,4*S*,4a*S*,6*R*,9*S*,11*S*,12*S*,12b*S*)-6,12b-diacetoxy-12-(benzoyloxy)-4,11-dihydroxy-4a,8,13,13-tetramethyl-5-oxo-2a,3,4,4a,5,6,9,10,11,12,12a,12b-dodecahydro-1*H*-7,11-methanocyclodeca[3,4]benzo[1,2-*b*]oxet-9-yl)oxy)-3-oxo-1-phenylpropan-2-yl)oxy)-4-oxobutanoic acid and *N*-Bz-pyrrolidine. The product was purified by flash chromatography on silica gel (1:1 Acetone/Petroleum ether). White solid.

(*S*, *R*)-L1: 132.5 mg, 60% yield, 98:2 dr; (*R*, *S*)-L1: 128.4 mg, 58% yield, 2:98 dr.

HPLC analysis: The dr was determined via HPLC on a CHIRALPAK IF column (50.0% 2-PrOH in hexanes, 0.8 mL/min); retention times for compound obtained using (*S*, *R*)-L1: 26.7 min (major), 62.4 min (minor).

NMR data for the product **63**:

<sup>1</sup>H NMR (400 MHz, CDCl<sub>3</sub>) (89:11 mixture of rotamers) δ 8.15 – 8.07 (m, 2.00H), 8.02 (d, *J* = 9.0 Hz, 0.89H), 7.81 – 7.69 (m, 2.00H), 7.62 – 7.57 (m, 1.00H), 7.53 – 7.47 (m, 2.11H), 7.45 – 7.26 (m, 12.00H), 7.24 – 7.18 (m, 1.00H), 6.28 (s, 1.00H), 6.24 – 6.14 (m, 1.00H), 5.94 (dd, *J* = 9.1, 3.9 Hz, 1.00H), 5.65 (d, *J* = 7.1 Hz, 1.00H), 5.43 (d, *J* = 3.9 Hz, 1.00H), 4.93 (dd, *J* = 9.6, 2.3 Hz, 1.00H), 4.57 (dd, *J* = 8.2, 6.3 Hz, 1.00H), 4.46 – 4.35 (m, 1.00H), 4.32 – 4.14 (m, 2.00H), 3.81 – 3.73 (m, 1.11H), 3.64 – 3.48 (m, 1.89H), 3.14 – 3.03 (m, 0.89H), 2.89 – 2.66 (m, 2.89H), 2.60 – 2.47 (m, 2.22H), 2.42 – 2.24 (m, 4.00H), 2.22 – 2.14 (m, 4.00H), 2.09 – 2.05 (m, 1.00H), 2.01 – 1.89 (m, 5.00H), 1.89 – 1.80 (m, 3.00H), 1.66 (s, 3.00H), 1.23 (s, 0.33H), 1.20 (s, 2.67H), 1.11 (s, 3.00H). <sup>13</sup>C NMR (101 MHz, CDCl<sub>3</sub>) major isomer δ 206.20, 203.81, 171.41, 171.10, 169.76, 169.47, 168.25, 167.47, 166.81, 142.99, 137.16, 135.44, 134.06, 133.51, 132.51, 131.45, 130.37, 130.14, 129.24, 128.72, 128.58, 128.23, 128.20, 128.14, 127.48, 127.15, 126.99, 84.37, 80.87, 78.93, 76.33, 75.59, 75.07, 74.23, 71.99, 71.56, 64.77, 58.40, 52.95, 50.24, 45.52, 43.06, 35.47, 34.47, 28.33, 27.46, 26.69, 25.54, 22.43, 22.03, 20.73, 14.72, 9.52.

NMR data for the product **64**:

$^1\text{H}$  NMR (400 MHz,  $\text{CDCl}_3$ ) (91:9 mixture of rotamers)  $\delta$  8.19 – 8.08 (m, 2.00H), 7.79 – 7.70 (m, 2.00H), 7.68 – 7.55 (m, 2.00H), 7.53 – 7.43 (m, 4.00H), 7.43 – 7.27 (m, 9.18H), 7.24 – 7.16 (m, 1.82H), 6.29 (s, 1.00H), 6.24 – 6.13 (m, 1.00H), 5.97 (dd,  $J$  = 9.0, 4.0 Hz, 1.00H), 5.66 (d,  $J$  = 7.1 Hz, 1.00H), 5.51 (d,  $J$  = 3.9 Hz, 0.91H), 5.47 – 5.41 (m, 0.09H), 4.95 (dd,  $J$  = 9.6, 2.3 Hz, 1.00H), 4.61 (dd,  $J$  = 8.3, 5.5 Hz, 0.91H), 4.52 – 4.36 (m, 1.09H), 4.33 – 4.14 (m, 2.00H), 3.80 (d,  $J$  = 7.0 Hz, 1.00H), 3.76 – 3.69 (m, 0.18H), 3.61 – 3.48 (m, 1.82H), 3.02 – 2.63 (m, 3.82H), 2.61 – 2.59 (m, 0.18H), 2.59 – 2.48 (m, 2.09H), 2.42 (s, 2.82H), 2.36 – 2.27 (m, 1.09H), 2.26 – 2.16 (m, 4.00H), 2.11 – 2.04 (m, 1.00H), 1.95 – 1.77 (m, 8.00H), 1.66 (s, 3.00H), 1.23 (s, 0.54H), 1.20 (s, 2.73H), 1.12 (s, 2.73H).  $^{13}\text{C}$  NMR (101 MHz,  $\text{CDCl}_3$ ) major isomer  $\delta$  206.59, 203.80, 171.63, 171.11, 169.86, 169.84, 167.99, 167.36, 166.91, 142.89, 137.15, 135.70, 133.64, 133.56, 132.61, 131.55, 130.29, 130.17, 129.22, 128.84, 128.64, 128.30, 128.23, 127.31, 127.09, 126.78, 84.39, 80.94, 78.99, 76.36, 75.58, 75.08, 74.17, 72.02, 71.58, 64.93, 58.44, 52.93, 50.25, 45.55, 43.09, 35.49, 34.08, 28.26, 27.66, 26.68, 25.31, 22.57, 22.04, 20.74, 14.70, 9.54.

FT-IR (film): 3440, 1722, 1618, 1243, 1071, 702  $\text{cm}^{-1}$ .

HRMS (ESI-MS)  $m/z$   $[\text{M}+\text{Na}]^+$  calcd for  $\text{C}_{62}\text{H}_{66}\text{N}_2\text{NaO}_{17}$ : 1133.4254, found: 1133.4255.

$[\alpha]^{25}_{\text{D}} = -39.2$  ( $c$  1.0,  $\text{CH}_2\text{Cl}_2$ ); 98:2 dr from (*S*, *R*)-**L1**.

$[\alpha]^{25}_{\text{D}} = -66.2$  ( $c$  1.0,  $\text{CH}_2\text{Cl}_2$ ); 2:98 dr from (*R*, *S*)-**L1**.

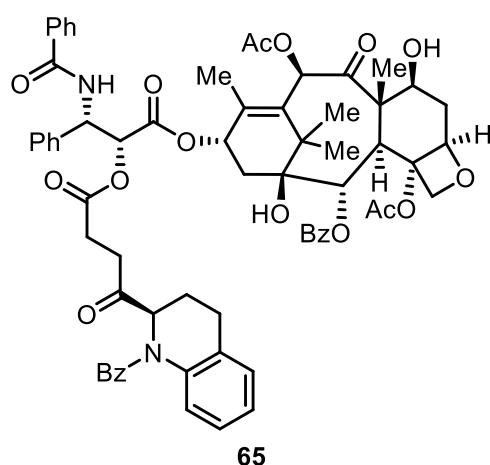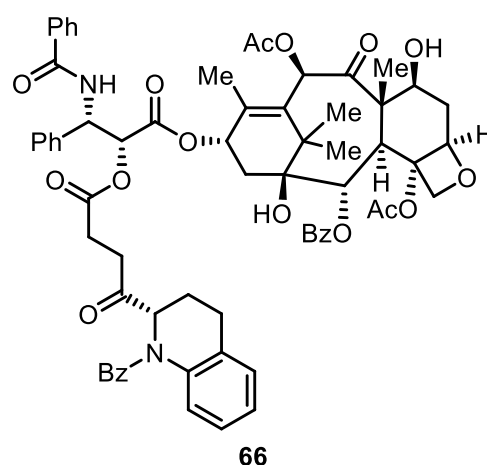

**(2*aR*,4*S*,4*aS*,6*R*,9*S*,11*S*,12*S*,12*bS*)-9-(((2*R*,3*S*)-3-Benzamido-2-((4-((*R*)-1-benzoyl-1,2,3,4-tetrahydroquinolin-2-yl)-4-oxobutanoyl)oxy)-3-phenylpropanoyl)oxy)-12-(benzoyloxy)-4,11-dihydroxy-4*a*,8,13,13-tetramethyl-5-oxo-3,4,4*a*,5,6,9,10,11,12,12*a*-decahydro-1*H*-7,11-methanocyclodeca[3,4]benzo[1,2-*b*]oxete-6,12*b*(2*aH*)-diyl diacetate (65, from (*S*, *R*)-**L1**). The title compound was synthesized according to **GP-B** from 4-(((1*S*,2*R*)-1-benzamido-3-(((2*aR*,4*S*,4*aS*,6*R*,9*S*,11*S*,12*S*,12*bS*)-6,12*b*-diacetoxo-12-(benzoyloxy)-4,11-dihydroxy-4*a*,8,13,13-tetramethyl-5-oxo-2*a*,3,4,4*a*,5,6,9,10,11,12,12*a*,12*b*-dodecahydro-1*H*-7,11-methanocyclodeca[3,4]benzo[1,2-*b*]oxet-9-yl)oxy)-3-oxo-1-phenylpropan-2-yl)oxy)-4-oxobutanoic acid and (3,4-dihydroquinolin-1(2*H*)-yl)(phenyl)methanone. The product was purified by flash chromatography on silica gel (1:2 Acetone/Petroleum ether). White solid.**

(*S*, *R*)-**L1**: 198.3 mg, 85% yield, 98:2 dr; (*R*, *S*)-**L1**: 196.6 mg, 84% yield, 2:98 dr.

HPLC analysis: The dr was determined via HPLC on a CHIRALPAK IF column (50.0% 2-*PrOH* in hexanes, 0.8 mL/min); retention times for compound obtained using (*S*, *R*)-**L1**: 27.8 min (major), 34.1 min (minor).

NMR data for the product **65**:

$^1\text{H}$  NMR (400 MHz,  $\text{CDCl}_3$ )  $\delta$  8.18 – 8.10 (m, 2H), 7.80 – 7.71 (m, 3H), 7.62 – 7.57 (m, 1H), 7.54 – 7.48 (m, 2H), 7.45 – 7.26 (m, 8H), 7.25 – 7.13 (m, 6H), 6.99 (td,  $J$  = 7.5, 1.0 Hz, 1H), 6.84 (td,  $J$  = 7.8, 1.2 Hz, 1H), 6.51 (dd,  $J$  = 8.0, 1.1 Hz, 1H), 6.30 (s, 1H), 6.28 – 6.18 (m, 1H), 6.00 (dd,  $J$  = 9.1, 3.4 Hz, 1H), 5.68 (d,  $J$  = 7.1 Hz, 1H), 5.48 (d,  $J$  = 3.4 Hz, 1H), 5.03 – 4.93 (m, 2H), 4.49 – 4.40 (m, 1H), 4.34 – 4.16 (m, 2H), 3.81 (d,  $J$  = 7.0 Hz, 1H), 3.07 – 2.87 (m, 2H), 2.83 – 2.62 (m, 4H), 2.58 – 2.49 (m, 2H), 2.45 – 2.32 (m, 5H), 2.25 – 2.14 (m, 4H), 1.94 – 1.82 (m, 5H), 1.79 – 1.65 (m, 4H), 1.24 (s, 3H), 1.13 (s, 3H).  $^{13}\text{C}$  NMR (101 MHz,  $\text{CDCl}_3$ )  $\delta$  205.99, 203.83, 171.38, 171.13, 170.48, 169.75, 168.10, 167.37, 166.90, 143.00, 138.24, 137.26, 134.67, 133.84, 133.55, 132.72, 132.56, 131.53, 130.70, 130.17, 129.25, 128.89, 128.87, 128.64, 128.31, 128.29, 128.00, 127.50, 127.39, 127.05, 126.44, 125.72, 125.02, 84.39, 80.94, 79.06, 76.37, 75.61, 75.12, 74.16, 72.04, 71.68, 62.65, 58.45, 52.91, 45.54, 43.10, 35.55, 35.49, 33.79, 27.47, 27.43, 26.73, 26.14, 22.53, 22.07, 20.74, 14.73, 9.54.

NMR data for the product **66**:

$^1\text{H}$  NMR (400 MHz,  $\text{CDCl}_3$ )  $\delta$  8.17 – 8.10 (m, 2H), 7.87 – 7.78 (m, 2H), 7.68 – 7.47 (m, 4H), 7.45 – 7.26 (m, 9H), 7.25 – 7.07 (m, 5H), 7.03 – 6.95 (m, 1H), 6.82 (td,  $J$  = 7.8, 1.6 Hz, 1H), 6.49 (dd,  $J$  = 8.1, 1.2 Hz, 1H), 6.30 (s, 1H), 6.27 – 6.18 (m, 1H), 6.09 – 5.97 (m, 1H), 5.68 (d,  $J$  = 7.1 Hz, 1H), 5.62 – 5.50 (m, 1H), 4.96 (dd,  $J$  = 9.7, 2.3 Hz, 1H), 4.79 (t,  $J$  = 8.2 Hz, 1H), 4.49 – 4.40 (m, 1H), 4.33 – 4.16 (m, 2H), 3.81 (d,  $J$  = 7.0 Hz, 1H), 3.13 – 3.01 (m, 1H), 2.85 – 2.50 (m, 7H), 2.46 – 2.32 (m, 5H), 2.22 (s, 4H), 1.93 – 1.89 (m, 3H), 1.89 – 1.74 (m, 3H), 1.68 (s, 3H), 1.23 (s, 3H), 1.13 (s, 3H).  $^{13}\text{C}$  NMR (101 MHz,  $\text{CDCl}_3$ )  $\delta$  206.63, 203.83, 171.37, 171.14, 170.57, 169.85, 168.04, 167.48, 166.95, 142.97, 138.12, 136.92, 134.62, 133.74, 133.55, 132.60, 132.56, 131.64, 130.74, 130.19, 129.22, 128.95, 128.91, 128.66, 128.40, 128.18, 128.00, 127.80, 127.43, 126.64, 126.41, 125.74, 125.16, 84.41, 80.96, 79.07, 76.39, 75.61, 75.12, 73.77, 72.07, 71.63, 62.61, 58.48, 52.57, 45.56, 43.11, 35.55, 35.50, 33.36, 27.62, 27.14, 26.73, 25.83, 22.53, 22.06, 20.75, 14.74, 9.55.

FT-IR (film): 3482, 1724, 1640, 1490, 1371, 1242, 1070, 708  $\text{cm}^{-1}$ .

HRMS (ESI-MS)  $m/z$   $[\text{M}+\text{Na}]^+$  calcd for  $\text{C}_{67}\text{H}_{68}\text{N}_2\text{NaO}_{17}$ : 1195.4410, found: 1195.4406.

$[\alpha]^{25}_{\text{D}} = +10.3$  (c 1.0,  $\text{CH}_2\text{Cl}_2$ ); 98:2 dr from (S, R)-**L1**.

$[\alpha]^{25}_{\text{D}} = -93.7$  (c 1.0,  $\text{CH}_2\text{Cl}_2$ ); 2:98 dr from (R, S)-**L1**.

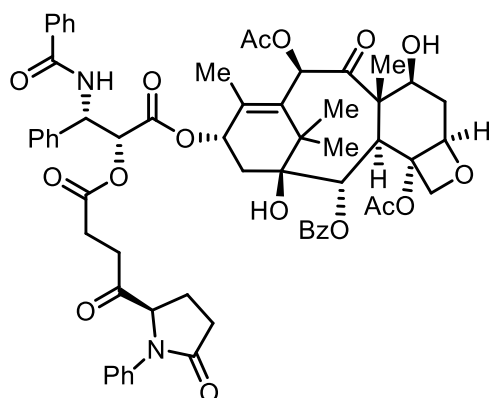

67

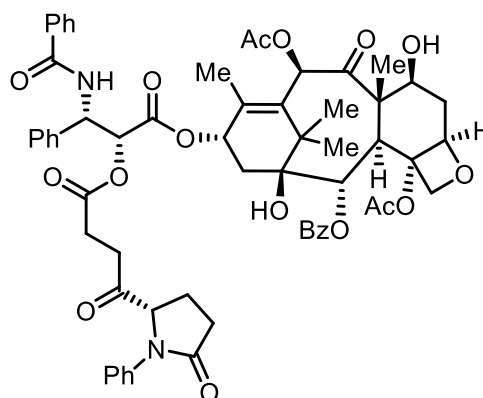

68

**(2a*R*,4*S*,4a*S*,6*R*,9*S*,11*S*,12*S*,12b*S*)-9-(((2*R*,3*S*)-3-Benzamido-2-((4-oxo-4-((*R*)-5-oxo-1-phenylpyrrolidin-2-yl)butanoyl)oxy)-3-phenylpropanoyl)oxy)-12-(benzoyloxy)-4,11-dihydroxy-4a,8,13,13-tetramethyl-5-oxo-3,4,4a,5,6,9,10,11,12,12a-decahydro-1*H*-7,11-methanocyclodeca[3,4]benzo[1,2-*b*]oxete-6,12b(2a*H*)-diyl diacetate (67, from (*S*, *R*)-L2).** The title compound was synthesized according to **GP-B** from 4-(((1*S*,2*R*)-1-benzamido-3-(((2a*R*,4*S*,4a*S*,6*R*,9*S*,11*S*,12*S*,12b*S*)-6,12b-diacetoxy-12-(benzoyloxy)-4,11-dihydroxy-4a,8,13,13-tetramethyl-5-oxo-2a,3,4,4a,5,6,9,10,11,12,12a,12b-dodecahydro-1*H*-7,11-methanocyclodeca[3,4]benzo[1,2-*b*]oxet-9-yl)oxy)-3-oxo-1-phenylpropan-2-yl)oxy)-4-oxobutanoic acid and 1-phenylpyrrolidin-2-one. The product was purified by flash chromatography on silica gel (2:3 Acetone/Petroleum ether). White solid.

(*S*, *R*)-L2: 149.3 mg, 68% yield, 95:5 dr; (*R*, *S*)-L2: 158.4 mg, 72% yield, 5:95 dr.

HPLC analysis: The dr was determined via HPLC on a CHIRALPAK IH column (60.0% 2-PrOH in hexanes, 0.8 mL/min); retention times for compound obtained using (*S*, *R*)-L2: 33.9 min (major), 54.3 min (minor).

NMR data for the product **67**:

<sup>1</sup>H NMR (400 MHz, CDCl<sub>3</sub>) δ 8.14 – 8.08 (m, 2H), 7.76 – 7.69 (m, 2H), 7.63 – 7.56 (m, 1H), 7.53 – 7.45 (m, 3H), 7.42 – 7.34 (m, 8H), 7.34 – 7.28 (m, 3H), 7.16 – 7.10 (m, 1H), 7.02 (d, *J* = 9.1 Hz, 1H), 6.31 – 6.25 (m, 1H), 6.22 – 6.14 (m, 1H), 5.92 (dd, *J* = 9.1, 3.7 Hz, 1H), 5.66 (d, *J* = 7.1 Hz, 1H), 5.47 (d, *J* = 3.8 Hz, 1H), 4.94 (dd, *J* = 9.6, 2.3 Hz, 1H), 4.84 – 4.74 (m, 1H), 4.47 – 4.34 (m, 1H), 4.28 (d, *J* = 8.5 Hz, 1H), 4.17 (d, *J* = 8.5 Hz, 1H), 3.78 (d, *J* = 7.0 Hz, 1H), 2.79 – 2.64 (m, 3H), 2.64 – 2.48 (m, 5H), 2.45 – 2.35 (m, 4H), 2.34 – 2.27 (m, 1H), 2.20 (s, 3H), 2.15 – 2.05 (m, 3H), 1.90 – 1.80 (m, 4H), 1.66 (s, 3H), 1.20 (s, 3H), 1.12 (s, 3H). <sup>13</sup>C NMR (101 MHz, CDCl<sub>3</sub>) δ 206.31, 203.66, 174.28, 171.58, 171.05, 169.70, 167.88, 167.10, 166.81, 142.43, 137.99, 136.76, 133.59, 133.54, 132.78, 131.87, 130.10, 129.18, 129.05, 129.00, 128.59, 128.57, 128.47, 127.04, 126.60, 125.44, 121.36, 84.30, 80.93, 78.87, 76.30, 75.49, 75.01, 74.21, 71.97, 71.79, 67.05, 58.37, 52.84, 45.54, 43.07, 35.50, 35.40, 33.14, 30.59, 26.87, 26.66, 22.51, 21.96, 21.62, 20.71, 14.60, 9.50.

NMR data for the product **68**:

<sup>1</sup>H NMR (400 MHz, CDCl<sub>3</sub>) δ 8.15 – 8.08 (m, 2H), 7.77 – 7.69 (m, 2H), 7.64 – 7.56 (m, 1H), 7.53 – 7.45 (m, 3H), 7.43 – 7.29 (m, 11H), 7.18 – 7.10 (m, 1H), 7.00 (d, *J* = 9.0 Hz, 1H), 6.34 – 6.26 (m, 1H), 6.25 – 6.13 (m, 1H), 5.92 (dd, *J* = 9.1, 3.6 Hz, 1H), 5.66 (d, *J* = 7.1 Hz, 1H), 5.45 (d, *J* = 3.7 Hz, 1H), 4.94 (dd, *J* = 9.6, 2.3 Hz, 1H), 4.81 (dd, *J* = 9.3, 4.0 Hz, 1H), 4.48 – 4.38 (m, 1H), 4.28 (d, *J* = 8.4 Hz, 1H), 4.18 (d, *J* = 8.5 Hz, 1H), 3.79 (d, *J* = 7.0 Hz, 1H), 2.84 – 2.74 (m, 1H), 2.69 – 2.63

(m, 2H), 2.61 – 2.46 (m, 5H), 2.45 – 2.35 (m, 4H), 2.35 – 2.27 (m, 1H), 2.20 (s, 3H), 2.16 – 2.05 (m, 3H), 1.93 – 1.81 (m, 4H), 1.66 (s, 3H), 1.21 (s, 3H), 1.12 (s, 3H). <sup>13</sup>C NMR (101 MHz, CDCl<sub>3</sub>) δ 206.62, 203.66, 174.26, 171.64, 171.06, 169.70, 167.88, 167.11, 166.83, 142.39, 138.00, 136.75, 133.56, 133.55, 132.85, 131.90, 130.10, 129.18, 129.07, 128.99, 128.61, 128.59, 128.44, 127.04, 126.60, 125.44, 121.23, 84.32, 80.96, 78.90, 76.31, 75.49, 75.02, 74.12, 71.96, 71.76, 67.11, 58.38, 52.73, 45.57, 43.08, 35.52, 35.42, 33.05, 30.65, 26.95, 26.68, 22.53, 21.95, 21.65, 20.72, 14.63, 9.52.

FT-IR (film): 3480, 2938, 1724, 1372, 1241, 1070, 710 cm<sup>-1</sup>.

HRMS (ESI-MS) *m/z* [M+Na]<sup>+</sup> calcd for C<sub>61</sub>H<sub>64</sub>N<sub>2</sub>NaO<sub>17</sub>: 1119.4097, found: 1119.4096.

[α]<sub>D</sub><sup>25</sup> = –37.3 (*c* 1.0, CH<sub>2</sub>Cl<sub>2</sub>); 95:5 dr from (*S*, *R*)-**L2**.

[α]<sub>D</sub><sup>25</sup> = –60.5 (*c* 1.0, CH<sub>2</sub>Cl<sub>2</sub>); 5:95 dr from (*R*, *S*)-**L2**.

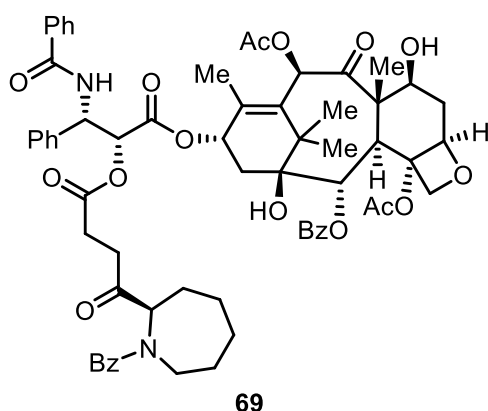

**69**

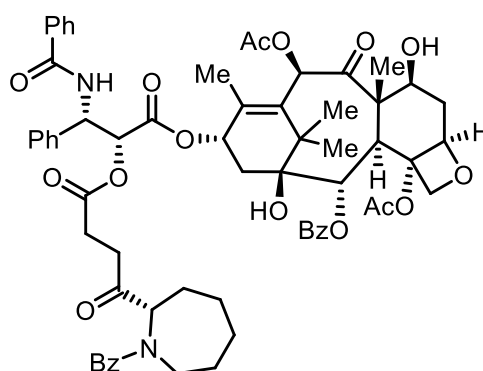

**70**

**(2*aR*,4*S*,4*aS*,6*R*,9*S*,11*S*,12*S*,12*bS*)-9-(((2*R*,3*S*)-3-Benzamido-2-(((4-((*R*)-1-benzoylazepan-2-yl)-4-oxobutanoyl)oxy)-3-phenylpropanoyl)oxy)-12-(benzoyloxy)-4,11-dihydroxy-4*a*,8,13,13-tetramethyl-5-oxo-3,4,4*a*,5,6,9,10,11,12,12*a*-decahydro-1*H*-7,11-methanocyclodeca[3,4]benzo[1,2-*b*]oxete-6,12*b*(2*aH*)-diyl diacetate (**69**, from (*S*, *R*)-**L1**). The title compound was synthesized according to **GP-B** from 4-(((1*S*,2*R*)-1-benzamido-3-(((2*aR*,4*S*,4*aS*,6*R*,9*S*,11*S*,12*S*,12*bS*)-6,12*b*-diacetoxyl-12-(benzoyloxy)-4,11-dihydroxy-4*a*,8,13,13-tetramethyl-5-oxo-2*a*,3,4,4*a*,5,6,9,10,11,12,12*a*,12*b*-dodecahydro-1*H*-7,11-methanocyclodeca[3,4]benzo[1,2-*b*]oxet-9-yl)oxy)-3-oxo-1-phenylpropan-2-yl)oxy)-4-oxobutanoic acid and azepan-1-yl(phenyl)methanone. The product was purified by flash chromatography on silica gel (2:3 Acetone/Petroleum ether). White solid.**

(*S*, *R*)-**L1**: 77.7 mg, 34% yield, 95:5 dr; (*R*, *S*)-**L1**: 73.6 mg, 32% yield, 7:93 dr.

HPLC analysis: The dr was determined via HPLC on a CHIRALPAK IF column (50.0% 2-PrOH in hexanes, 0.8 mL/min); retention times for compound obtained using (*S*, *R*)-**L1**: 26.2 min (major), 33.3 min (minor).

NMR data for the product **69**:

<sup>1</sup>H NMR (400 MHz, CDCl<sub>3</sub>) (81:19 mixture of rotamers) δ 8.15 – 8.09 (m, 2.00H), 7.85 – 7.68 (m, 3.00H), 7.62 – 7.56 (m, 1.00H), 7.54 – 7.27 (m, 14.00H), 7.25 – 7.15 (m, 1.00H), 6.28 (s, 1.00H), 6.25 – 6.16 (m, 1.00H), 6.01 – 5.91 (m, 1.00H), 5.66 (d, *J* = 7.0 Hz, 1.00H), 5.54 – 5.48 (m, 0.19H), 5.45 (d, *J* = 3.9 Hz, 0.81H), 4.94 (dd, *J* = 9.6, 2.3 Hz, 1.00H), 4.67 (dd, *J* = 11.7, 4.7 Hz, 0.81H), 4.46 – 4.38 (m, 1.00H), 4.32 – 4.14 (m, 2.19H), 3.82 – 3.73 (m, 1.19H), 3.63 – 3.56 (m, 0.81H), 3.38 – 3.19 (m, 0.81H), 3.16 – 2.97 (m, 0.81H), 2.91 – 2.62 (m, 3.19H), 2.59 – 2.48 (m, 2.19H), 2.42 – 2.24 (m, 4.00H), 2.22 – 2.15 (m, 4.00H), 2.12 – 2.02 (m, 1.00H), 1.95 – 1.85 (m, 6.00H), 1.79 – 1.69 (m, 2.00H), 1.68 – 1.61 (m, 4.00H), 1.51 – 1.30 (m, 3.00H), 1.21 (s, 3.00H), 1.12 (s, 3.00H). <sup>13</sup>C NMR

(101 MHz, CDCl<sub>3</sub>) major isomer  $\delta$  206.67, 203.82, 172.70, 171.63, 171.11, 169.78, 168.30, 167.45, 166.86, 142.95, 137.29, 136.14, 133.95, 133.54, 132.61, 131.52, 130.16, 129.50, 129.28, 128.86, 128.61, 128.40, 128.29, 127.41, 127.09, 126.33, 84.40, 80.93, 78.98, 76.36, 75.60, 75.11, 74.19, 72.01, 71.64, 65.14, 58.44, 53.03, 47.37, 45.54, 43.10, 35.49, 34.25, 30.66, 28.55, 28.25, 27.56, 26.72, 26.23, 22.47, 22.06, 20.73, 14.73, 9.54.

NMR data for the product **70**:

<sup>1</sup>H NMR (400 MHz, CDCl<sub>3</sub>) (83:17 mixture of rotamers)  $\delta$  8.18 – 8.08 (m, 2.00H), 7.87 – 7.69 (m, 2.83H), 7.64 – 7.54 (m, 1.17H), 7.52 – 7.46 (m, 2.17H), 7.44 – 7.27 (m, 10.83H), 7.25 – 7.16 (m, 1.83H), 7.06 – 6.99 (m, 0.17H), 6.29 (s, 1.00H), 6.26 – 6.15 (m, 1.00H), 6.01 – 5.90 (m, 1.00H), 5.66 (d,  $J$  = 7.1 Hz, 1.00H), 5.54 – 5.49 (m, 0.83H), 5.45 (d,  $J$  = 4.0 Hz, 0.17H), 5.01 – 4.90 (m, 1.00H), 4.74 – 4.58 (m, 0.83H), 4.51 – 4.33 (m, 1.17H), 4.30 – 4.16 (m, 2.00H), 3.90 – 3.68 (m, 1.17H), 3.62 – 3.54 (m, 0.83H), 3.31 – 3.18 (m, 0.83H), 3.17 – 2.98 (m, 0.17H), 2.94 – 2.48 (m, 6.00H), 2.46 – 2.29 (m, 4.00H), 2.25 – 2.17 (m, 3.83H), 2.12 – 2.04 (m, 2.17H), 1.95 – 1.82 (m, 5.00H), 1.80 – 1.72 (m, 1.17H), 1.71 – 1.57 (m, 4.83H), 1.52 – 1.39 (m, 1.83H), 1.36 – 1.27 (m, 1.17H), 1.20 (s, 3.00H), 1.11 (s, 3.00H). <sup>13</sup>C NMR (101 MHz, CDCl<sub>3</sub>) major isomer  $\delta$  206.68, 203.77, 172.76, 171.59, 171.06, 169.85, 167.89, 167.44, 166.86, 142.83, 137.11, 136.07, 133.63, 133.50, 132.63, 131.52, 130.14, 129.45, 129.24, 128.79, 128.61, 128.37, 128.24, 127.34, 126.69, 126.26, 84.37, 80.93, 78.94, 76.34, 75.56, 75.10, 74.18, 71.97, 71.55, 64.97, 58.41, 52.85, 47.32, 45.55, 43.08, 35.51, 33.87, 30.59, 28.34, 28.27, 27.70, 26.65, 26.07, 22.53, 22.05, 20.70, 14.68, 9.53.

FT-IR (film): 3448, 2931, 1723, 1613, 1243, 1071, 707 cm<sup>-1</sup>.

HRMS (ESI-MS)  $m/z$  [M+H]<sup>+</sup> calcd for C<sub>64</sub>H<sub>71</sub>N<sub>2</sub>O<sub>17</sub>: 1139.4747, found: 1139.4746.

$[\alpha]^{25}_{\text{D}}$  = –44.4 (*c* 1.0, CH<sub>2</sub>Cl<sub>2</sub>); 95:5 dr from (*S*, *R*)-**L1**.

$[\alpha]^{25}_{\text{D}}$  = –55.8 (*c* 1.0, CH<sub>2</sub>Cl<sub>2</sub>); 7:93 dr from (*R*, *S*)-**L1**.

## Gram-scale synthesis of 5:

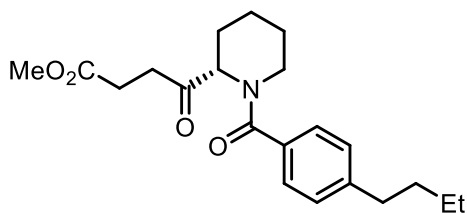

5

In a glovebox, a 200-mL flask, equipped with a Teflon stir bar, was charged with Ir[dF(CF<sub>3</sub>)ppy]<sub>2</sub>(dtbbpy)PF<sub>6</sub> (89.8 mg, 0.080 mmol, 1 mol%), NiCl<sub>2</sub>·glyme (175.8 mg, 0.80 mmol, 10 mol%), (*R, S*)-**L2** (534.2 mg, 1.04 mmol, 13 mol%), (4-butylphenyl)(piperidin-1-yl)methanone (5.89 g, 24.0 mmol, 3.0 equiv), anhydrous PhH (80.0 mL), and the reaction mixture was allowed to stir at room temperature for 45 min, after which it turned to a pale yellow suspension. Next, 4-methoxy-4-oxobutanoic acid (1056.9 mg, 8.0 mmol, 1.0 equiv) was added as a solid, and followed by the addition of 2,6-lutidine (1.40 mL, 12.0 mmol, 1.5 equiv) via syringe. Then, DMDC (1.29 mL, 12.0 mmol, 1.5 equiv) was added dropwise via syringe. The flask was closed with a rubber stopper and wrapped with electrical tape. Next, the reaction mixture was transferred out of the glovebox, and then vacuum grease was liberally applied to cover the entire top of septum cap. Then, the reaction mixture was cooled to 20 °C and stirred at that temperature for 3 min before irradiation. The reaction was stirred at 20 °C for 28 hours under blue LED irradiation with 3\*40W blue LED lamps (Kessil PR160L, 427 nm). The reaction mixture was then passed through a short pad of silica gel, with acetone as the eluent (~400 mL). The resulting mixture was concentrated, and the residue was purified by flash chromatography on silica gel (1:4 Acetone/Petroleum ether). Yellow oil.

(*R, S*)-**L2**: 1.710 g, 59% yield, 94% ee.

## Iterative coupling sequence:

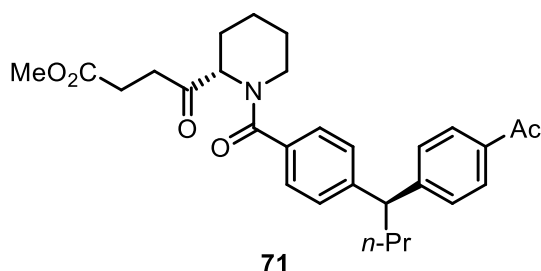

71

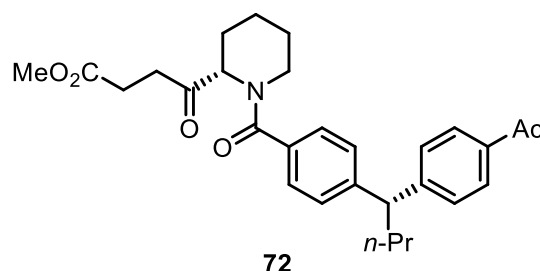

72

**Methyl 4-((*S*)-1-(4-((*R*)-1-(4-acetylphenyl)butyl)benzoyl)piperidin-2-yl)-4-oxobutanoate (71, from (*S*)-**L6**).**<sup>2,3</sup> In a glovebox, Ir[dF(CF<sub>3</sub>)ppy]<sub>2</sub>(dtbbpy)PF<sub>6</sub> (2.2 mg, 0.002 mmol, 1 mol%), NiBr<sub>2</sub>·glyme (6.2 mg, 0.020 mmol, 10 mol%), (*S*)-**L6** (17.0 mg, 0.030 mmol, 15 mol%), K<sub>2</sub>CO<sub>3</sub> (55.3 mg, 0.40 mmol, 2.0 equiv), methyl (*R*)-4-(1-(4-butylbenzoyl)piperidin-2-yl)-4-oxobutanoate (215.7 mg, 0.60 mmol, 3.0 equiv), a Teflon stir bar, and anhydrous EtOAc (2.0 mL) was add sequentially to 15-mL vial. The reaction mixture was stirred at room temperature for 30 min, after which it turned to a pale yellow suspension. 1-(4-Bromophenyl)ethan-1-one

(39.8 mg, 0.20 mmol, 1.0 equiv) was added as a solid. Next, the vial was closed with a PTFE septum cap and wrapped with electrical tape. Then, the vial was transferred out of the glovebox, and then vacuum grease was liberally applied to cover the punctures in the septum cap. Then, the reaction mixture was cooled to 20 °C and stirred at that temperature for 1 min before being irradiated with a 40 W the blue LED lamp (Kessil PR160L, 427 nm). The reaction was stirred under blue LED irradiation at 20 °C for 24 hours. The reaction mixture was then passed through a short pad of silica gel, with acetone as the eluent (~20 mL). The resulting mixture was concentrated, and the residue was purified by preparative TLC on silica gel (2:7 Acetone/Petroleum ether). Yellow oil.

(*S*)-**L6**: 46.3 mg, 48% yield, 92:8 dr; (*R*)-**L6**: 39.4 mg, 41% yield, 8:92 dr.

HPLC analysis: The dr was determined via HPLC on a CHIRALPAK IH column (40.0% 2-PrOH in hexanes, 0.8 mL/min); retention times for compound obtained using (*S*)-**L6**: 24.2 min (major), 31.8 min (minor).

NMR data for the product **71**:

<sup>1</sup>H NMR (500 MHz, CDCl<sub>3</sub>) (86:14 mixture of rotamers) δ 7.88 (d, *J* = 8.0 Hz, 2.00H), 7.44 – 7.26 (m, 6.00H), 5.35 (d, *J* = 5.6 Hz, 0.86H), 4.65 (d, *J* = 13.6 Hz, 0.14H), 4.36 (s, 0.14H), 4.00 (t, *J* = 7.8 Hz, 1.00H), 3.74 – 3.59 (m, 4.00H), 3.25 – 3.10 (m, 0.86H), 2.92 – 2.78 (m, 1.86H), 2.63 (t, *J* = 6.4 Hz, 1.86H), 2.56 (s, 3.28H), 2.36 (d, *J* = 13.6 Hz, 0.86H), 2.04 (q, *J* = 7.8 Hz, 2.14H), 1.76 – 1.68 (m, 2.00H), 1.59 – 1.53 (m, 0.86H), 1.49 – 1.36 (m, 2.00H), 1.31 – 1.25 (m, 2.14H), 0.93 (t, *J* = 7.3 Hz, 3.00H). <sup>13</sup>C NMR (126 MHz, CDCl<sub>3</sub>) major isomer δ 206.98, 197.63, 173.12, 171.32, 150.18, 146.15, 135.35, 133.64, 128.58, 128.06, 127.91, 127.25, 58.51, 51.74, 50.88, 46.25, 37.39, 33.82, 27.41, 26.46, 25.59, 25.08, 20.93, 20.66, 13.89.

NMR data for the product **72**:

<sup>1</sup>H NMR (500 MHz, CDCl<sub>3</sub>) (86:14 mixture of rotamers) δ 7.87 (d, *J* = 7.8 Hz, 1.72H), 7.44 – 7.26 (m, 5.00H), 7.26 – 7.20 (m, 1.28H), 5.34 (d, *J* = 5.7 Hz, 0.86H), 4.64 (d, *J* = 13.4 Hz, 0.14H), 4.35 (s, 0.14H), 3.99 (t, *J* = 7.9 Hz, 1.00H), 3.74 – 3.60 (m, 4.00H), 3.16 (t, *J* = 12.5 Hz, 0.86H), 2.87 – 2.79 (m, 1.86H), 2.62 (t, *J* = 6.5 Hz, 1.86H), 2.55 (s, 3.28H), 2.35 (d, *J* = 13.7 Hz, 0.86H), 2.03 (q, *J* = 7.8 Hz, 2.14H), 1.75 – 1.68 (m, 2.00H), 1.55 (d, *J* = 10.9 Hz, 0.86H), 1.46 – 1.36 (m, 2.00H), 1.30 – 1.24 (m, 2.14H), 0.92 (t, *J* = 7.3 Hz, 3.00H). <sup>13</sup>C NMR (126 MHz, CDCl<sub>3</sub>) major isomer δ 206.97, 197.62, 173.12, 171.32, 150.21, 146.15, 135.36, 133.65, 128.59, 128.06, 127.91, 127.25, 58.51, 51.74, 50.89, 46.25, 37.39, 33.82, 27.41, 26.46, 25.60, 25.08, 20.93, 20.66, 13.89.

FT-IR (film): 3474, 2955, 2870, 1738, 1682, 1633, 1422, 1269, 737 cm<sup>-1</sup>.

HRMS (ESI-MS) *m/z* [M+H]<sup>+</sup> calcd for C<sub>29</sub>H<sub>36</sub>NO<sub>5</sub>: 478.2588, found: 478.2586.

[α]<sub>D</sub><sup>25</sup> = –51.1 (*c* 1.0, CH<sub>2</sub>Cl<sub>2</sub>); 92:8 dr from (*S*)-**L6**.

[α]<sub>D</sub><sup>25</sup> = –53.2 (*c* 1.0, CH<sub>2</sub>Cl<sub>2</sub>); 8:92 dr from (*R*)-**L6**.

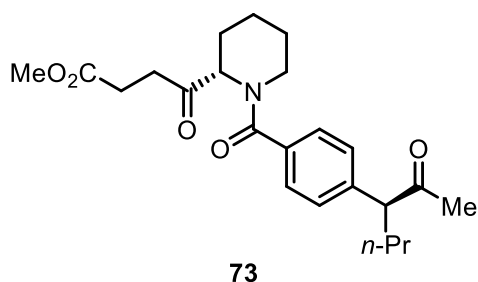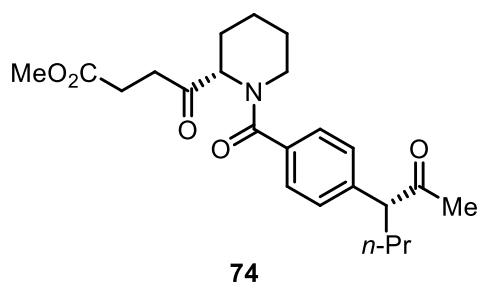

**Methyl 4-oxo-4-((S)-1-(4-((S)-2-oxohexan-3-yl)benzoyl)piperidin-2-yl)butanoate (73,** from (S)-L3).<sup>4</sup> In a glovebox, Ir[dF(CF<sub>3</sub>)ppy]<sub>2</sub>(dtbbpy)PF<sub>6</sub> (2.2 mg, 0.002 mmol, 1 mol%), NiBr<sub>2</sub>·glyme (6.2 mg, 0.020 mmol, 10 mol%), (S)-L3 (9.4 mg, 0.026 mmol, 13 mol%), NH<sub>4</sub>Cl (10.7 mg, 0.20 mmol, 1.0 equiv), Na<sub>2</sub>HPO<sub>4</sub> (42.6 mg, 0.30 mmol, 1.5 equiv), methyl (R)-4-(1-(4-butylbenzoyl)piperidin-2-yl)-4-oxobutanoate (215.7 mg, 0.60 mmol, 3.0 equiv), a Teflon stir bar, and anhydrous *i*-PrOAc (2.0 mL) was added sequentially to 15-mL vial. The reaction mixture was stirred at room temperature for 30 min, after which it turned to a purple suspension. Next, the vial was closed with a PTFE septum cap and wrapped with electrical tape. Then, acetic acid (11.5  $\mu$ L, 0.20 mmol, 1.0 equiv) and DMDC (32.2  $\mu$ L, 0.30 mmol, 1.5 equiv) were added sequentially via microsyringe. Next, the vial was transferred out of the glovebox, and then vacuum grease was liberally applied to cover the punctures in the septum cap. Then, the reaction mixture was cooled to 10 °C and stirred at that temperature for 1 min before being irradiated with a 40 W blue LED lamp (Kessil PR160L, 427 nm). The reaction was stirred under blue LED irradiation at 10 °C for 25 hours. The reaction mixture was then passed through a short pad of silica gel, with acetone as the eluent (~20 mL). The resulting mixture was concentrated, and the residue was purified by preparative TLC on silica gel (1:3 Acetone/Petroleum ether). Colorless oil.

(S)-L3: 64.2 mg, 80% yield, 97:3 dr; (R)-L3: 65.1 mg, 81% yield, 2:98 dr.

HPLC analysis: The dr was determined via HPLC on a CHIRALPAK AD-3 column (20.0% 2-PrOH in hexanes, 1.0 mL/min); retention times for compound obtained using (S)-L3: 18.1 min (major), 19.7 min (minor).

NMR data for the product **73**:

<sup>1</sup>H NMR (500 MHz, CDCl<sub>3</sub>) (83:17 mixture of rotamers)  $\delta$  7.42 – 7.34 (m, 1.66H), 7.31 – 7.27 (m, 0.32H), 7.26 – 7.20 (m, 2.00H), 5.33 (d, *J* = 4.4 Hz, 0.83H), 4.63 (d, *J* = 13.8 Hz, 0.17H), 4.34 (s, 0.17H), 3.71 – 3.55 (m, 5.00H), 3.24 – 3.12 (m, 0.83H), 2.89 – 2.77 (m, 1.83H), 2.62 (t, *J* = 6.4 Hz, 1.83H), 2.55 (brs, 0.34H), 2.39 – 2.30 (m, 0.83H), 2.25 (d, *J* = 13.2 Hz, 0.17H), 2.04 (s, 2.83H), 2.01 – 1.93 (m, 1.17H), 1.76 – 1.68 (m, 2.00H), 1.67 – 1.61 (m, 1.17H), 1.58 – 1.53 (m, 0.83H), 1.48 – 1.34 (m, 2.00H), 1.22 – 1.14 (m, 2.00H), 0.85 (t, *J* = 7.4 Hz, 3.00H). <sup>13</sup>C NMR (126 MHz, CDCl<sub>3</sub>) major isomer  $\delta$  207.92, 206.87, 173.07, 171.09, 140.80, 134.48, 128.29, 127.45, 59.16, 58.47, 51.72, 46.20, 33.88, 33.76, 29.13, 27.36, 25.55, 25.07, 20.61, 20.47, 13.82.

NMR data for the product **74**:

<sup>1</sup>H NMR (500 MHz, CDCl<sub>3</sub>) (83:17 mixture of rotamers)  $\delta$  7.39 (d, *J* = 8.0 Hz, 1.66H), 7.30 – 7.27 (m, 0.34H), 7.24 (d, *J* = 8.0 Hz, 2.00H), 5.33 (d, *J* = 4.7 Hz, 0.83H), 4.63 (d, *J* = 13.9 Hz, 0.17H), 4.34 (s, 0.17H), 3.70 – 3.55 (m, 5.00H), 3.26 – 3.07 (m, 0.83H), 2.94 – 2.73 (m, 1.83H), 2.61 (t, *J* = 6.4 Hz, 1.83H), 2.55 (s, 0.34H), 2.43 – 2.29 (m, 0.83H), 2.24 (d, *J* = 13.6 Hz, 0.17H), 2.06 – 1.92 (m, 4.00H), 1.76 – 1.67 (m, 2.00H), 1.67 – 1.61 (m, 1.17H), 1.56 (d, *J* = 8.9 Hz, 0.83H), 1.47 – 1.35 (m, 1.83H), 1.22 – 1.13 (m, 2.17H), 0.85 (t, *J* = 7.3 Hz, 3.00H). <sup>13</sup>C NMR (126 MHz, CDCl<sub>3</sub>) major

isomer  $\delta$  207.89, 206.86, 173.06, 171.09, 140.81, 134.48, 128.28, 127.45, 59.17, 58.48, 51.72, 46.20, 33.87, 33.76, 29.09, 27.36, 25.54, 25.07, 20.61, 20.46, 13.82.

FT-IR (film): 3474, 2956, 1716, 1632, 1424, 1356, 1166, 848  $\text{cm}^{-1}$ .

HRMS (ESI-MS)  $m/z$   $[\text{M}+\text{Na}]^+$  calcd for  $\text{C}_{23}\text{H}_{31}\text{NNaO}_5$ : 424.2094; found: 424.2108.

$[\alpha]^{25}_{\text{D}} = +46.5$  ( $c$  1.0,  $\text{CH}_2\text{Cl}_2$ ); 97:3 dr from (*S*)-**L3**.

$[\alpha]^{25}_{\text{D}} = -156.8$  ( $c$  1.0,  $\text{CH}_2\text{Cl}_2$ ); 2:98 dr from (*R*)-**L3**.

## 1.6 Mechanistic Studies

### A. The importance of chloride in the reaction.

The procedure is the same as **GP-A**, and the reactions were quenched through a small plug of silica gel, which was flushed with acetone.

The yield was determined via GC analysis with tetradecane as an internal standard. The ee values were determined via HPLC analysis after purification by preparative TLC.

### Supplementary Table 8. The importance of chloride for the reactions.

| entry | Variation                                                                      | results           |
|-------|--------------------------------------------------------------------------------|-------------------|
| 1     | NiCl <sub>2</sub> ·glyme (none)                                                | 73% yield, 97% ee |
| 2     | NiBr <sub>2</sub> ·glyme                                                       | 8% yield, 98% ee  |
| 3     | Ni(COD) <sub>2</sub>                                                           | 2% yield, ee: ND  |
| 4     | Ni(COD) <sub>2</sub> , 1.5 equiv of <b>LiCl</b> added                          | 6% yield, ee: ND  |
| 5     | Ni(COD) <sub>2</sub> , <b>[Ir(III)]Cl</b> instead of [Ir(III)]PF <sub>6</sub>  | 2% yield, ee: ND  |
| 6     | Ni(acac) <sub>2</sub>                                                          | 28% yield, 89% ee |
| 7     | Ni(acac) <sub>2</sub> , 1.5 equiv of <b>LiCl</b> added                         | 64% yield, 95% ee |
| 8     | Ni(acac) <sub>2</sub> , <b>[Ir(III)]Cl</b> instead of [Ir(III)]PF <sub>6</sub> | 38% yield, 60% ee |

The use of chloride-free nickel salts in combination with [Ir(III)]Cl as a photocatalyst led to significantly lower efficiency (entries 3, 5, 6, and 8), which does not support the oxidatively chlorine generation ( $E > +1.21$  V vs SCE in CH<sub>3</sub>CN: S. Rohe, A. O. Morris, T. McCallum, L. Barriault, *Angew. Chem. Int. Ed.* **2018**, 57, 15664–15669.).

## B. The intermediacy of the $\alpha$ -amino radical.

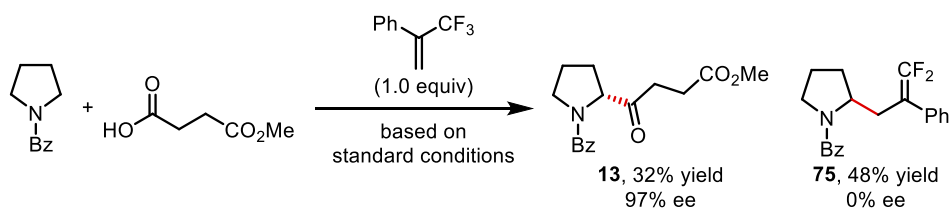

Control experiment in the absence of an acyl surrogate and the proposed reaction pathway:

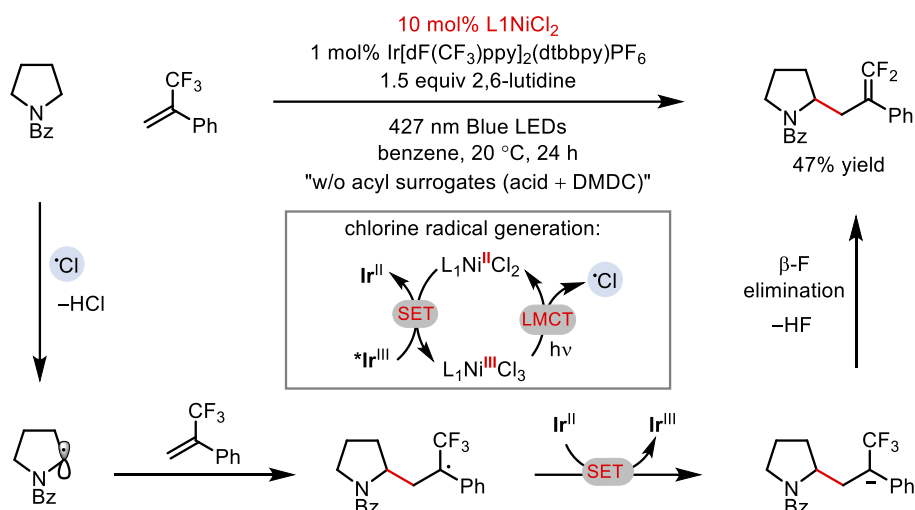

**Supplementary Fig. 1** The intermediacy of  $\alpha$ -amino radicals.

The procedure is the same as **GP-A**, except for the following change: following the addition of 4-methoxy-4-oxobutanoic acid and dimethyl dicarbonate, (3,3,3-trifluoroprop-1-en-2-yl)benzene (15.0  $\mu$ L, 0.10 mmol, 1.0 equiv) was added by a microsyringe.

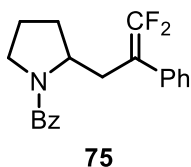

**(2-(3,3-Difluoro-2-phenylallyl)pyrrolidin-1-yl)(phenyl)methanone.** The title compound was synthesized according to **GP-A** from *N*-Bz-pyrrolidine and (3,3,3-trifluoroprop-1-en-2-yl)benzene (15.0  $\mu$ L, 0.10 mmol, 1.0 equiv). The pure product was isolated by preparative TLC on silica gel (1:5 EtOAc/Petroleum ether) to give a yellow oil (15.6 mg, 48% yield).

$^1\text{H}$  NMR (400 MHz,  $\text{CDCl}_3$ ) (80:20 mixture of rotamers)  $\delta$  7.60 – 7.41 (m, 2.00H), 7.41 – 7.27 (m, 5.20H), 7.25 – 7.06 (m, 2.40H), 6.68 (d,  $J$  = 7.4 Hz, 0.40H), 4.42 – 4.24 (m, 0.80H), 3.85 – 3.78 (m, 0.20H), 3.75 – 3.68 (m, 0.40H), 3.39 – 3.23 (m, 1.60H), 3.19 – 3.06 (m, 0.80H), 2.86 – 2.71 (m, 0.80H), 2.40 – 2.29 (m, 0.40H), 2.04 – 1.94 (m, 1.00H), 1.91 – 1.83 (m, 1.00H), 1.77 – 1.63 (m, 2.00H).  $^{13}\text{C}$  NMR (101 MHz,  $\text{CDCl}_3$ )  $\delta$  170.09, 169.88, 154.51 (dd,  $J_{\text{C-F}}$  = 293.5, 287.7 Hz), 136.93, 133.10, 129.87, 129.30, 128.60, 128.54, 128.12 (t,  $J_{\text{C-F}}$  = 3.2 Hz), 127.98, 127.52, 127.31, 127.23, 126.45, 89.95 (dd,  $J$  = 21.4, 13.5 Hz), 56.83, 56.04, 50.27, 45.80, 31.44, 30.12, 29.23, 24.96, 21.78.  $^{19}\text{F}$  NMR (471 MHz,  $\text{CDCl}_3$ )  $\delta$  -89.81 (dd,  $J$  = 115.2 Hz, 39.6 Hz, 0.40F), -90.20 (dd,  $J$  = 151.1 Hz, 41.1 Hz, 1.60F).

All spectroscopic data were consistent with the literature.<sup>3</sup>

### C. Stoichiometric experiments with pregenerated Ni(II) acyl chloride species.

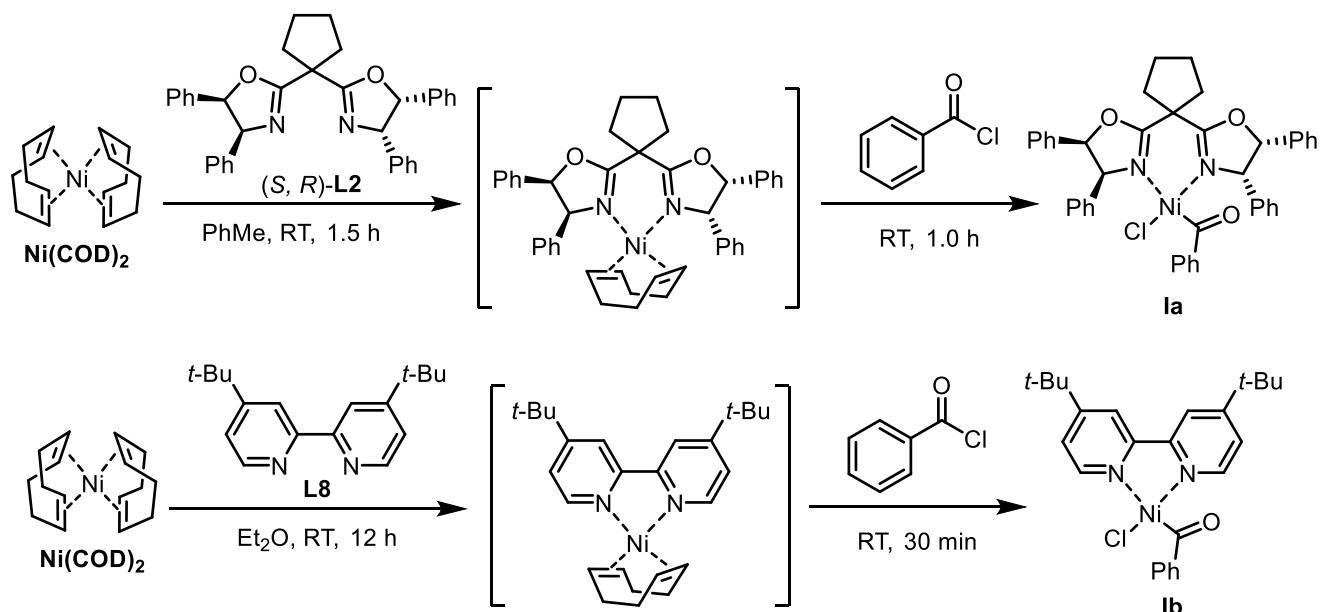

**Supplementary Fig. 2** Synthesis of oxidative addition complex.

**Synthesis of oxidative addition complex.** The complexes were synthesized in analogy with the reported procedure.<sup>5</sup>

For **Ia**: In a 40-mL vial equipped with a PTFE-coated stirring bar,  $(S, R)\text{-L2}$  (512.7 mg, 1.00 mmol, 1.0 equiv) and  $\text{Ni}(\text{COD})_2$  (275.1 mg, 1.00 mmol, 1.0 equiv) were charged in a glovebox, then the dry toluene (10.0 ml) was added. The reaction was stirred at room temperature for 1.5 h, then benzoyl chloride (116.0  $\mu\text{L}$ , 1.0 mmol, 1.0 equiv) were added via a microsyringe and the reaction was stirred at room temperature for 1.0 h. The complex was precipitated by adding pentane (25 ml), then was collected by filtration and washed thoroughly with pentane. The solid was dried in vacuo, affording **Ia** as a brown powder (372.5 mg, 52%), which was stored in the glovebox at  $-30^\circ\text{C}$ . Attempts to obtain crystals suitable for X-ray crystallography have been unsuccessful.

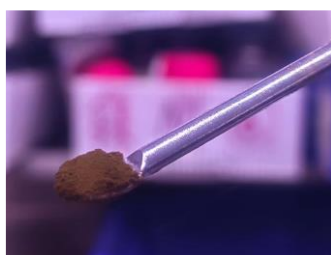

**Note:** The sample is paramagnetic.  $^1\text{H}$  and  $^{13}\text{C}$  NMR showed signal broadening, therefore no complete analytical characterization was possible.

HRMS (ESI-MS) calcd for  $([\text{C}_{42}\text{H}_{37}\text{ClN}_2\text{NiO}_3\text{-Cl+MeCN}]^+)$ : 716.2418, found: 716.2436.

Note: A Ni(II) acyl chloride complex derived from the achiral ligand dtbbpy that has a comparable reactivity (Table 1, entry 8), can be isolated and characterized (as shown below).

For **Ib**: In a glovebox, in a 20-mL vial equipped with a PTFE-coated stirring bar, 4,4'-di-*tert*-butyl-2,2'-pyridine (215.0 mg, 0.8 mmol, 1.0 equiv) and Ni(COD)<sub>2</sub> (220.0 mg, 0.8 mmol, 1.0 equiv) were charged in a glovebox, then the dry Et<sub>2</sub>O (8.0 mL) was added. The resulting mixture was stirred for 12 h at room temperature. To the vial was added benzoyl chloride (93.0  $\mu$ L, 0.8 mmol, 1.0 equiv) and stirred for 30 min. The resulting red suspension was collected by filtration and washed thoroughly with Et<sub>2</sub>O. The solid was dried in vacuo, affording **Ib** as a red powder (246.9 mg, 66%), which was stored in the glovebox at -30 °C.

<sup>1</sup>H NMR (500 MHz, CD<sub>2</sub>Cl<sub>2</sub>)  $\delta$  8.88 (s, 1H), 8.58 (d, *J* = 4.4 Hz, 2H), 7.86 (d, *J* = 9.7 Hz, 2H), 7.75 (s, 1H), 7.52 (s, 1H), 7.49 – 7.40 (m, 3H), 7.21 (s, 1H), 1.41 (s, 9H), 1.35 (s, 9H).

All spectroscopic data were consistent with the literature.<sup>5</sup>

### Supplementary Table 9. Stoichiometric experiments with pregenerated Ni(II) acyl chloride species.

| 1.0 equiv | x equiv                                                           | <b>36</b>         |
|-----------|-------------------------------------------------------------------|-------------------|
| entry     | conditions                                                        | results           |
| 1         | <b>Ia</b> , 3.0 equiv <i>N</i> -Bz pyrrolidine, benzene (0.5 mL)  | 8% yield, 60% ee  |
| 2         | <b>Ia</b> , 15.0 equiv <i>N</i> -Bz pyrrolidine, benzene (1.0 mL) | 22% yield, 69% ee |
| 3         | <b>Ib</b> , 3.0 equiv <i>N</i> -Bz pyrrolidine, benzene (0.5 mL)  | 3% yield, 0% ee   |
| 4         | <b>Ib</b> , 15.0 equiv <i>N</i> -Bz pyrrolidine, benzene (1.0 mL) | 11% yield, 0% ee  |

### Representative procedure for stoichiometric experiments.

In a glovebox, **Ia** or **Ib** (0.05 mmol, 1.0 equiv), Ir[dF(CF<sub>3</sub>)ppy]<sub>2</sub>(dtbbpy)PF<sub>6</sub> (5.5 mg, 0.005 mmol, 10 mol%), *N*-Bz-pyrrolidine (131.5 mg, 0.75 mmol, 15.0 equiv), a Teflon stir bar, and anhydrous benzene (1.0 mL) were added sequentially to a 4-mL vial. Next, the vial was sealed with a septum cap and wrapped with electrical tape. Then, 2,6-lutidine (9.0  $\mu$ L, 0.075 mmol, 1.5 equiv) was added via a microsyringe. The vial was transferred out of the glovebox. Then, the reaction mixture was stirred at 20 °C in an EtOH bath for 1 min before being irradiated with a 40 W the blue LED lamp (Kessil PR160L, 427 nm). The reaction was stirred under blue LED irradiation at 20 °C for 24 hours. Next, the lamp was turned off and tetradecane (13.0  $\mu$ L, 0.05 mmol) was added as an internal standard. The mixture was filtered through a small plug of silica gel, which was flushed with acetone (~5 mL). The yield was determined via GC analysis with tetradecane as an internal standard. The ee values were determined via HPLC analysis after purification by preparative thin-layer chromatography.

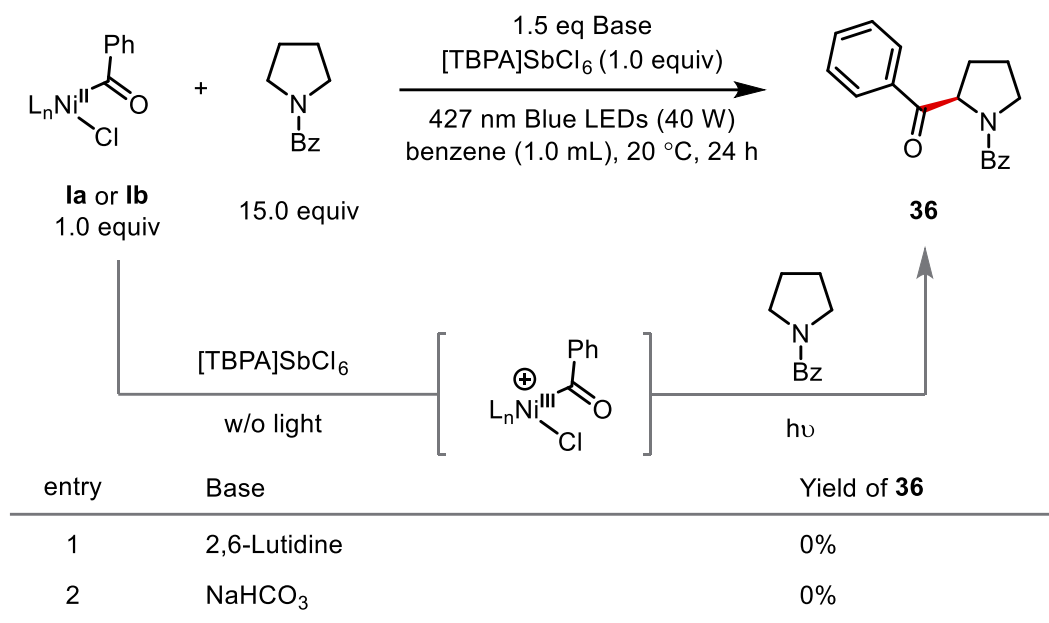

**Supplementary Fig. 3** Stoichiometric oxidation experiments with pregenerated Ni(II) acyl chloride species.

**Representative procedure for stoichiometric oxidation experiments.** In a glovebox, **Ia** or **Ib** (0.05 mmol, 1.0 equiv), *N*-Bz-pyrrolidine (131.5 mg, 0.75 mmol, 15.0 equiv), [TBPA]SbCl<sub>6</sub> (40.9 mg, 0.05 mmol, 1.0 equiv), a Teflon stir bar, and anhydrous benzene (1.0 mL) were added sequentially to a 4-mL vial. The vial was sealed with a septum cap and wrapped with electrical tape. Next, 2,6-lutidine (9.0 μL, 0.075 mmol, 1.5 equiv) was added via a microsyringe. The vial was transferred out of the glovebox. Then, the reaction mixture was stirred at 20 °C in an EtOH bath for 1 min before being irradiated with a 40 W the blue LED lamp (Kessil PR160L, 427 nm). The reaction was stirred under blue LED irradiation at 20 °C for 24 hours. Next, the lamp was turned off and tetradecane (13.0 μL, 0.05 mmol) was added as an internal standard. The mixture was filtered through a small plug of silica gel, which was flushed with acetone (~5 mL). The yield was determined via GC analysis with tetradecane as an internal standard.

#### D. Cyclic voltammogram studies and luminescence quenching experiments.

**Cyclic voltammogram studies.** The cyclic voltammograms were recorded in an electrolyte of Et<sub>4</sub>NPF<sub>6</sub> (0.1 M) in MeCN at 20 °C using a glassy carbon disk working electrode (diameter, 1 mm), a Pt wire auxiliary electrode and a SCE reference electrode. The scan rate was 100 mV/s.

**Synthesis of L1NiCl<sub>2</sub>.** In a 15-mL vial equipped with a PTFE-coated stirring bar, (S, R)-L1 (12.6 mg, 0.018 mmol, 1.2 equiv) and NiCl<sub>2</sub>·glyme (3.3 mg, 0.015 mmol, 1.0 equiv) were charged in a glovebox, then the dry MeCN (5.0 ml) was added. The reaction was stirred at room temperature for 0.5 hours. The complex was used in cyclic voltammogram studies without further purification.

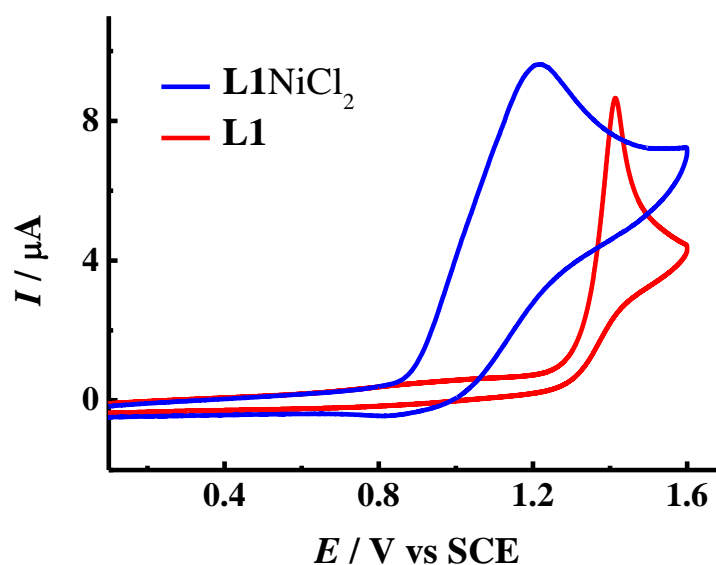

**Supplementary Fig. 4** Cyclic voltammograms of the L1NiCl<sub>2</sub> (3.0 mM) and the chiral ligand ((S, R)-L1) (3.0 mM) in MeCN.

Steady-state emission spectra were obtained at room temperature using a Hitachi F7000 fluorescence spectrophotometer with a scan range of 430 nm  $\rightarrow$  600 nm at a scan rate of 2400 nm/min and resolution of 0.5 nm. Emission slit width was maintained at 1.0 nm and excitation slit width was maintained at 2.5 nm. The iridium complex solutions were excited at 380 nm.

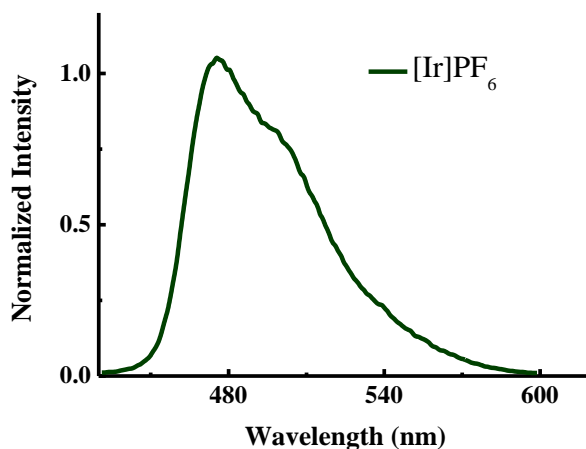

**Supplementary Fig. 5** Steady-state emission spectra for [Ir]PF<sub>6</sub> in EtOAc (40 μM)

**Luminescence quenching experiments.** Emission intensities were recorded on a Hitachi F7000 fluorescence spectrophotometer in a 10.0 mm quartz cuvette. These solution of [Ir]PF<sub>6</sub> was excited at 425 nm and the emission intensity was measured at 475 nm (emission maximum). The concentration was 40 μM in EtOAc. The concentration of the quencher stock solution was 100 mM in EtOAc (**L1** and **78**) or THF (**L1**NiCl<sub>2</sub>) or DME (LiCl). For each quenching experiment, 10 μL of this stock solution were titrated to a solution (2.0 mL) of [Ir]PF<sub>6</sub> (40 μM in EtOAc) in a screw-top 10.0 mm quartz cuvette. The addition of 10 μL stock solution refers to an increase of the quencher concentration of 0.5 mM. After degassing with an argon stream for 3 minutes, the emission intensity was collected.

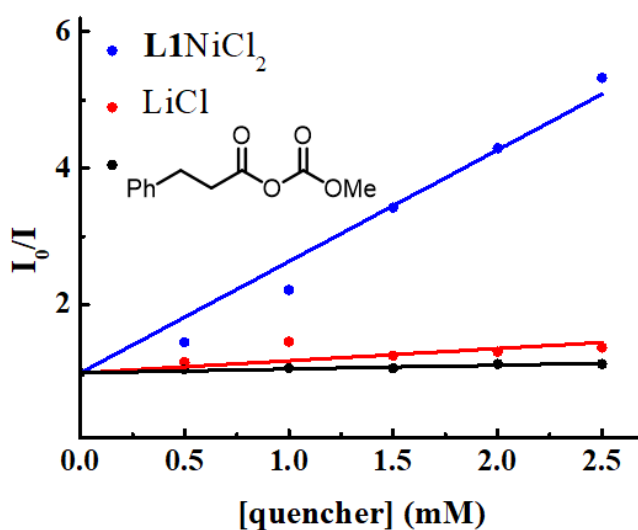

**Supplementary Fig. 6** Luminescence quenching experiments.

## 1.7 Assignment of Absolute Configuration

The configuration of the coupling product **40** illustrated in Figure 2 using (*S*, *R*)-**L2**, was determined via X-ray crystallography.

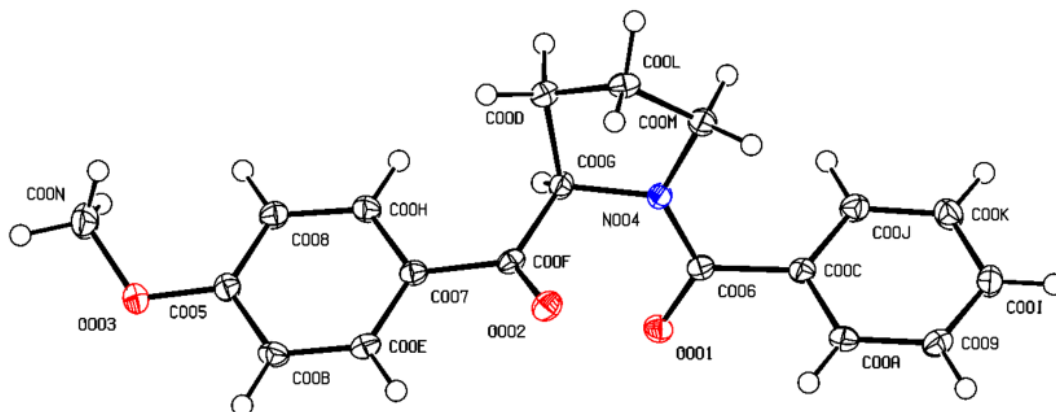

**Supplementary Fig. 7** Thermal ellipsoid plot at the 50% probability level.

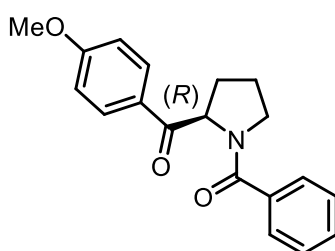

**(*R*)-1-(4-(1-(3-Methoxybenzoyl)pyrrolidin-2-yl)phenyl)ethan-1-one.** X-ray quality crystals were obtained by slow evaporation of a saturated solution in hexane and DCM of a sample synthesized using (*S*, *R*)-**L2**. A crystal of C<sub>19</sub>H<sub>19</sub>NO<sub>3</sub> was selected and mounted in a nylon loop in immersion oil. All measurements were made on a XtaLAB Synergy, Dualflex, HyPix diffractometer with filtered Cu-K $\alpha$  radiation at a temperature of 100.15 K. Using Olex2<sup>6</sup>, the structure was solved with the olex2.solve<sup>7</sup> structure solution program using direct methods and refined with the SHELXL<sup>8</sup> refinement package using least squares minimization. The absolute stereochemistry was determined on the basis of the absolute structure parameter.

**Supplementary Table 10. Crystal data and structure refinement for the product 40 in Fig. 3.**

|                                      |                                                             |                     |
|--------------------------------------|-------------------------------------------------------------|---------------------|
| Identification code                  | <b>compound 40</b>                                          |                     |
| Empirical formula                    | $\text{C}_{19}\text{H}_{19}\text{NO}_3$                     |                     |
| Formula weight                       | 309.35                                                      |                     |
| Temperature                          | 100.15 K                                                    |                     |
| Wavelength                           | 1.54184 Å                                                   |                     |
| Crystal system                       | orthorhombic                                                |                     |
| Space group                          | $\text{P2}_1\text{2}_1\text{2}_1$                           |                     |
| Unit cell dimensions                 | $a = 6.33970(10)$ Å                                         | $\alpha = 90^\circ$ |
|                                      | $b = 11.0813(2)$ Å                                          | $\beta = 90^\circ$  |
|                                      | $c = 22.5319(4)$ Å                                          | $\gamma = 90^\circ$ |
| Volume                               | $1582.91(5)$ Å <sup>3</sup>                                 |                     |
| Z                                    | 4                                                           |                     |
| Density (calculated)                 | $1.298$ g/cm <sup>3</sup>                                   |                     |
| Absorption coefficient               | $0.709$ mm <sup>-1</sup>                                    |                     |
| F(000)                               | 656.0                                                       |                     |
| Theta range for data collection      | 7.848 to 150.122°.                                          |                     |
| Index ranges                         | $-6 \leq h \leq 7, -13 \leq k \leq 13, -27 \leq l \leq 27$  |                     |
| Reflections collected                | 36581                                                       |                     |
| Independent reflections              | 3101 [ $R(\text{int}) = 0.0463, R(\text{sigma}) = 0.0171$ ] |                     |
| Data / restraints / parameters       | 3101/ 0 / 209                                               |                     |
| Goodness-of-fit on $F^2$             | 1.075                                                       |                     |
| Final R indices [ $I > 2\sigma(I)$ ] | $R1 = 0.0270, wR2 = 0.0685$                                 |                     |
| R indices (all data)                 | $R1 = 0.0277, wR2 = 0.0690$                                 |                     |
| Absolute structure parameter [Flack] | 0.04 (5)                                                    |                     |
| Largest diff. peak and hole          | 0.12 and -0.18 e.Å <sup>-3</sup>                            |                     |

Chemical structure of (R,S)-L1 is shown above the  $^1\text{H}$  NMR spectrum. The structure is a bis-oxazoline derivative with two phenyl groups and two methoxy groups.

$^1\text{H}$  NMR spectrum (400 MHz,  $\text{CDCl}_3$ ) data:

| Chemical Shift (ppm)                                                                                                                                                                                                               | Integration                          |
|------------------------------------------------------------------------------------------------------------------------------------------------------------------------------------------------------------------------------------|--------------------------------------|
| 7.64, 7.63, 7.27, 7.26, 7.26, 7.25, 6.98, 6.97, 6.96, 6.94, 6.93, 6.90, 6.89, 6.88, 6.88, 6.87, 5.86, 5.66, 5.66, 5.64, 5.64, 5.44, 5.44, 5.42, 5.42, 3.92, 3.92, 3.91, 3.89, 3.89, 3.88, 3.85, 3.83, 3.83, 3.82, 3.80, 3.80, 3.79 | 1.97, 2.33, 24.10, 2.00, 2.00, 10.16 |

$^{13}\text{C}$  NMR spectrum (100 MHz,  $\text{CDCl}_3$ ) data:

| Chemical Shift (ppm)                                                                                                                                                           |
|--------------------------------------------------------------------------------------------------------------------------------------------------------------------------------|
| 168.62, 158.44, 137.63, 136.10, 132.17, 128.14, 127.85, 127.41, 127.38, 127.10, 126.90, 126.72, 126.30, 120.08, 110.29, 86.03, 77.25, 77.00, 76.75, 73.73, 55.36, 48.92, 34.19 |

S-65

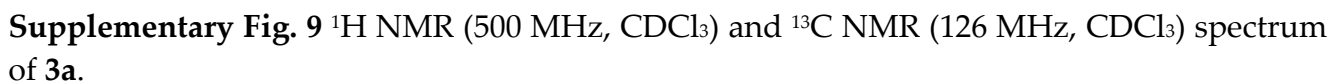

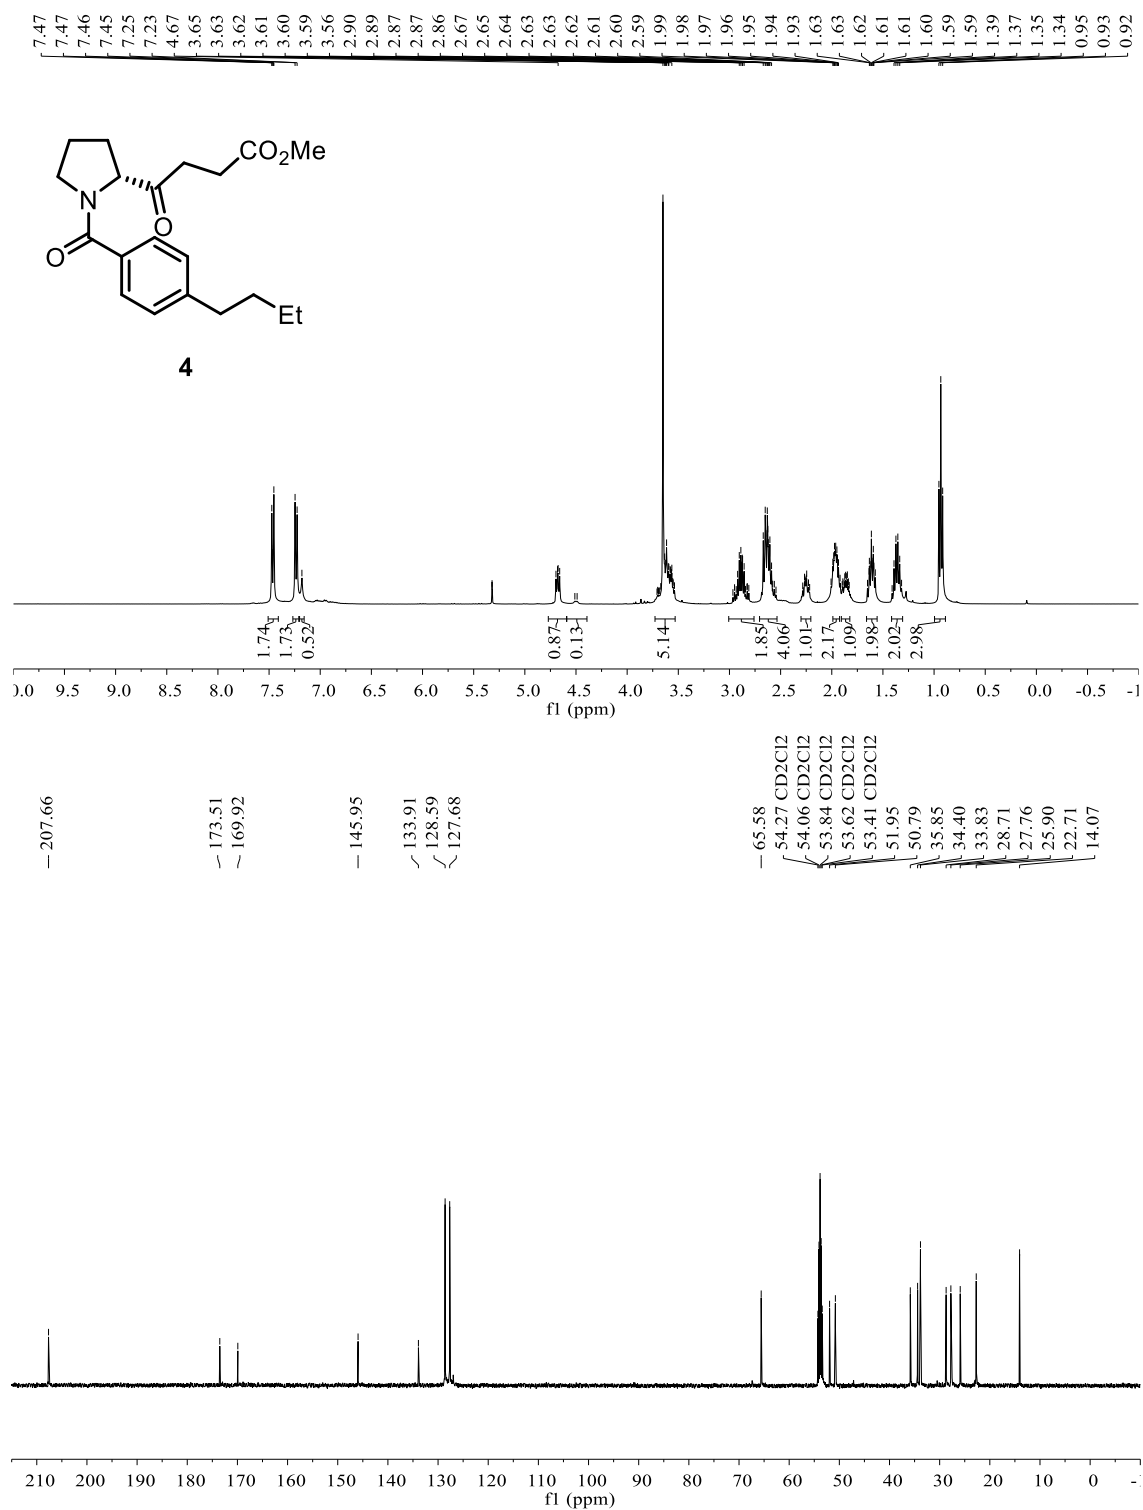

**Supplementary Fig. 10**  $^1\text{H}$  NMR (400 MHz,  $\text{CD}_2\text{Cl}_2$ ) and  $^{13}\text{C}$  NMR (126 MHz,  $\text{CD}_2\text{Cl}_2$ ) spectrum of **4**.

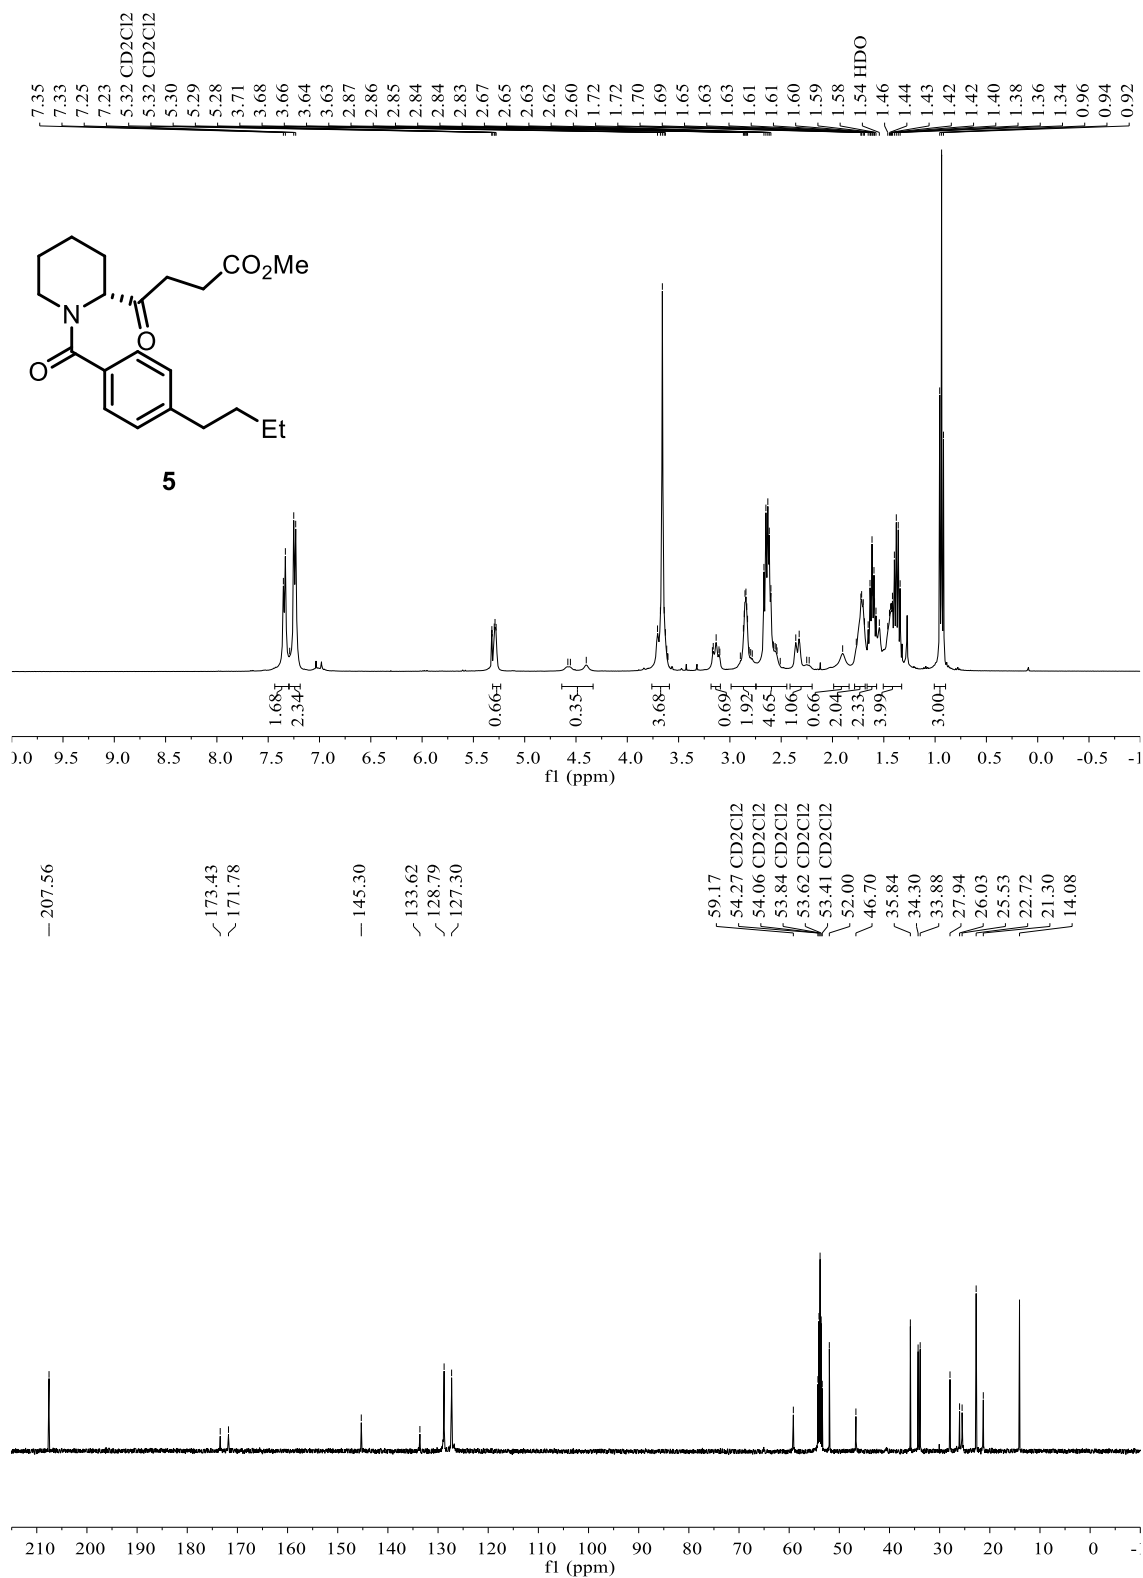

**Supplementary Fig. 11** <sup>1</sup>H NMR (400 MHz, CD<sub>2</sub>Cl<sub>2</sub>) and <sup>13</sup>C NMR (126 MHz, CD<sub>2</sub>Cl<sub>2</sub>) spectrum of **5**.

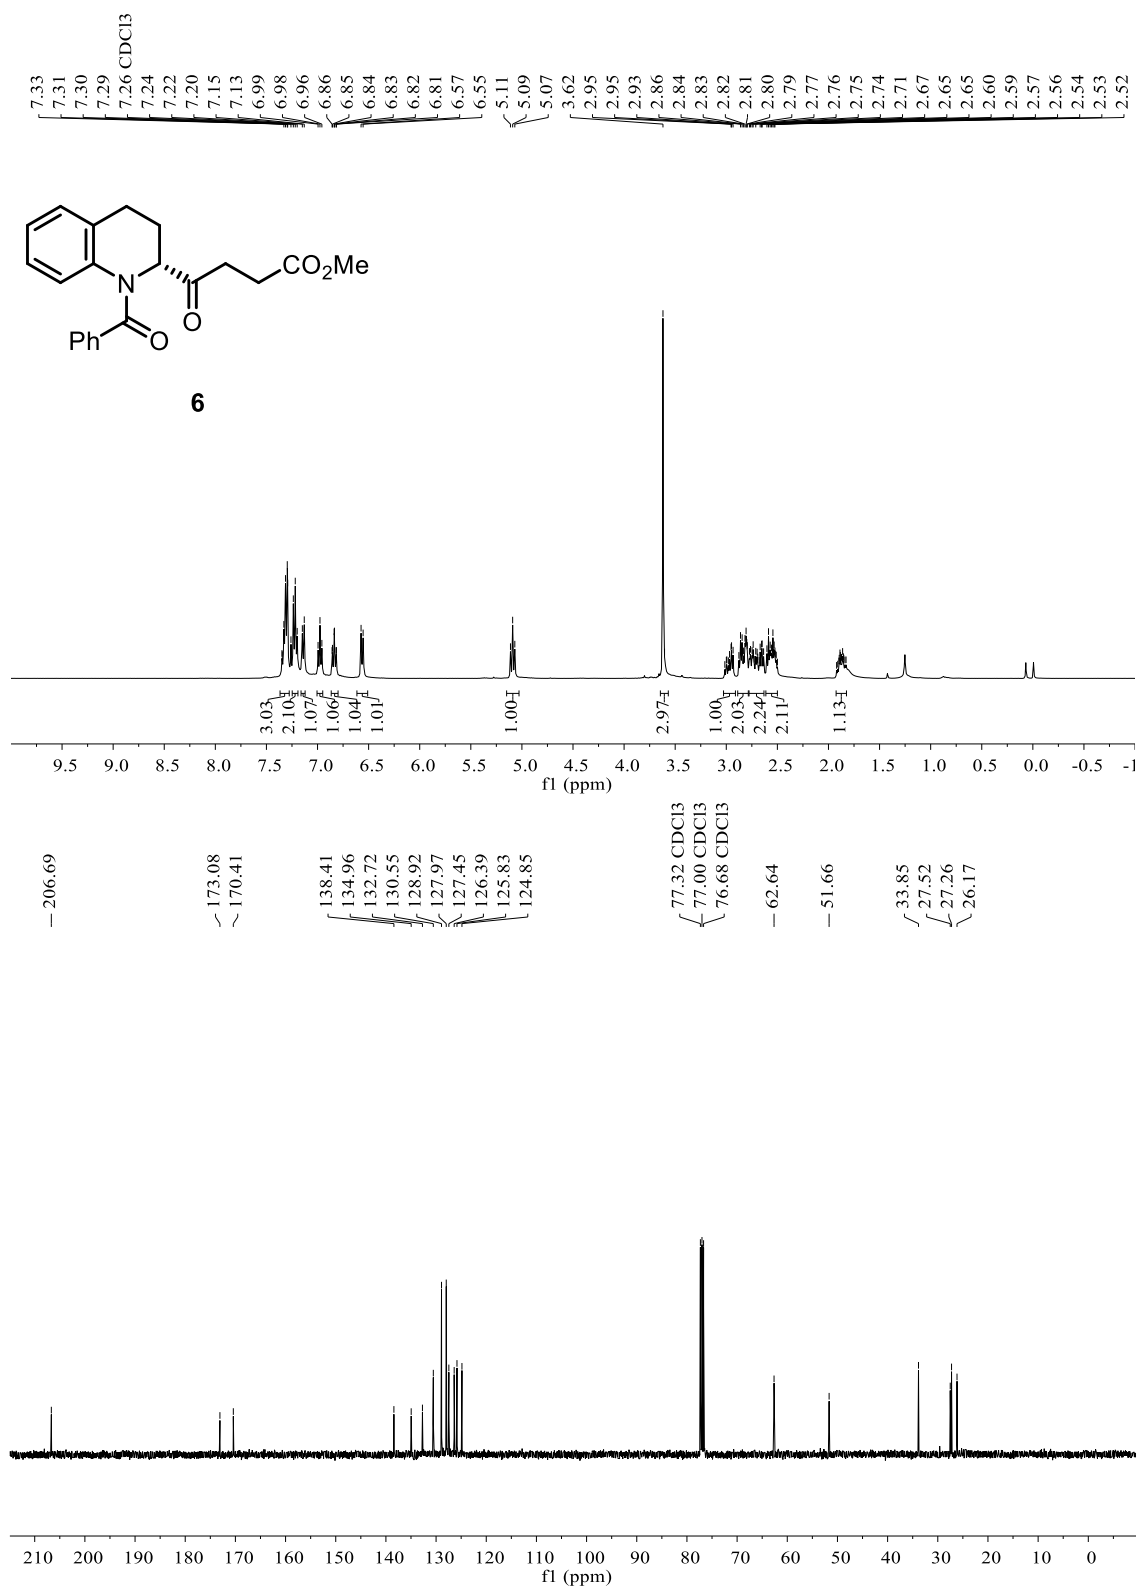

**Supplementary Fig. 12**  $^1\text{H}$  NMR (400 MHz,  $\text{CDCl}_3$ ) and  $^{13}\text{C}$  NMR (101 MHz,  $\text{CDCl}_3$ ) spectrum of **6**.

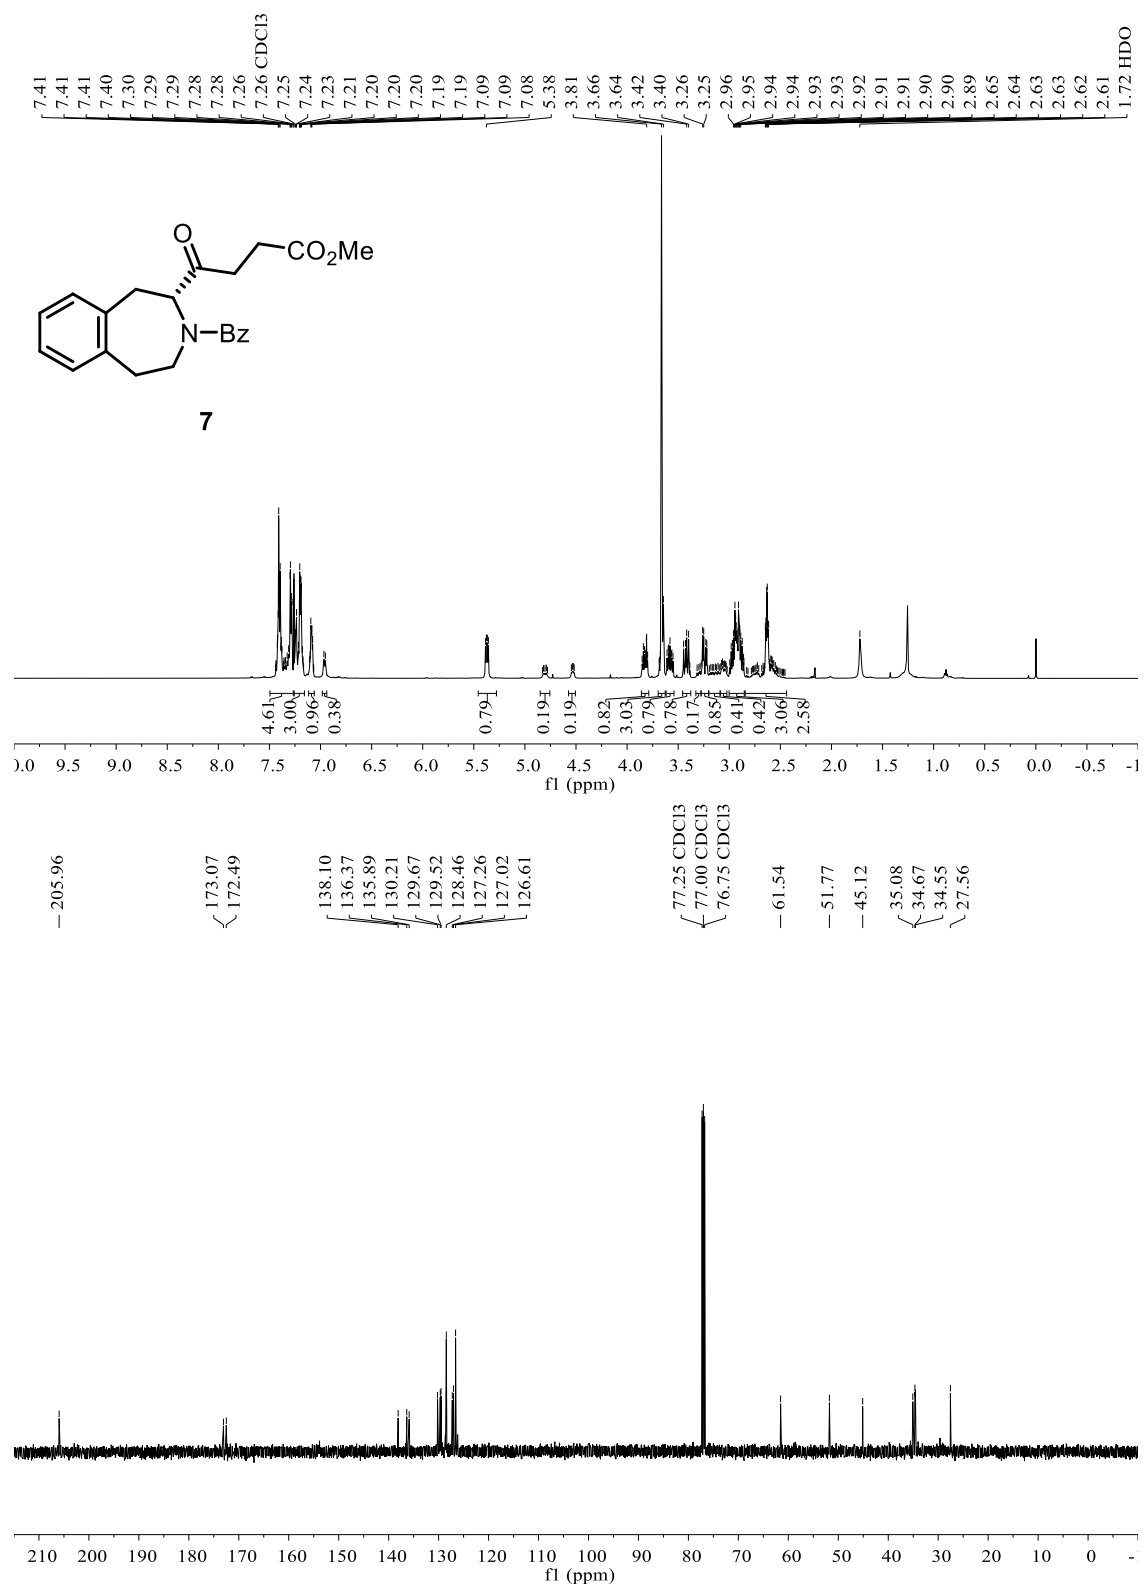

**Supplementary Fig. 13**  $^1\text{H}$  NMR (500 MHz,  $\text{CDCl}_3$ ) and  $^{13}\text{C}$  NMR (126 MHz,  $\text{CDCl}_3$ ) spectrum of **7**.

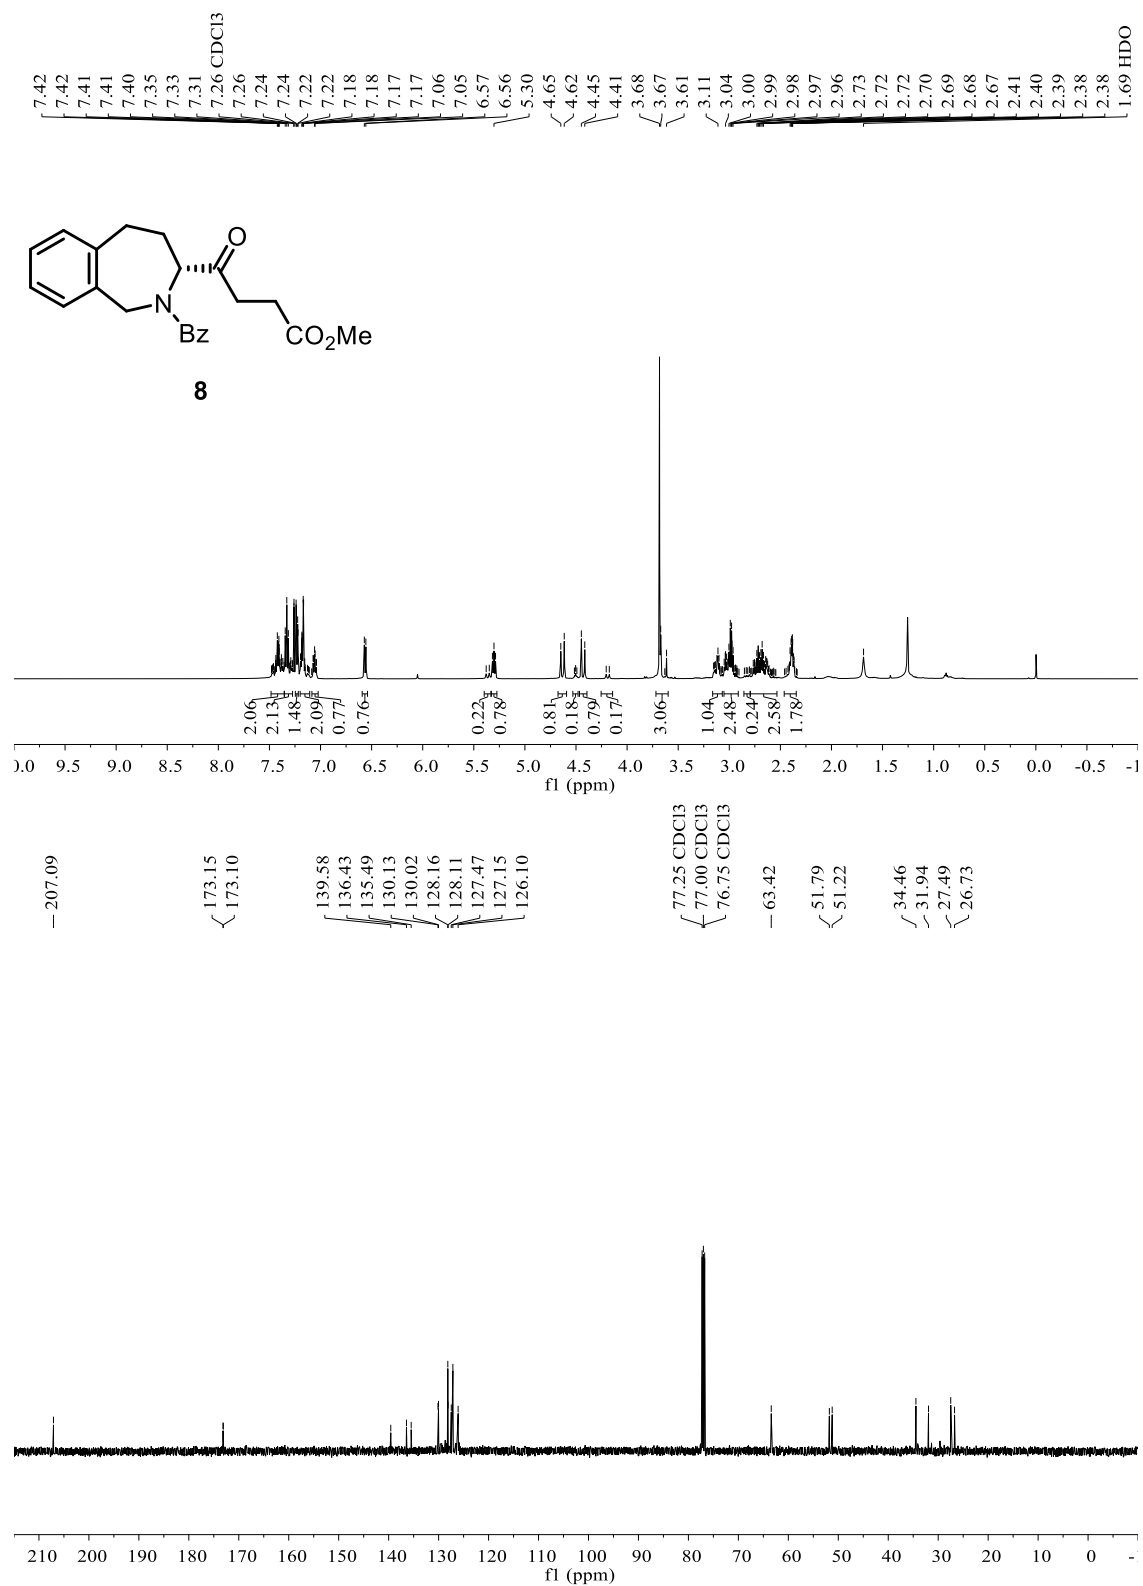

**Supplementary Fig. 14** <sup>1</sup>H NMR (500 MHz, CDCl<sub>3</sub>) and <sup>13</sup>C NMR (126 MHz, CDCl<sub>3</sub>) spectrum of **8**.

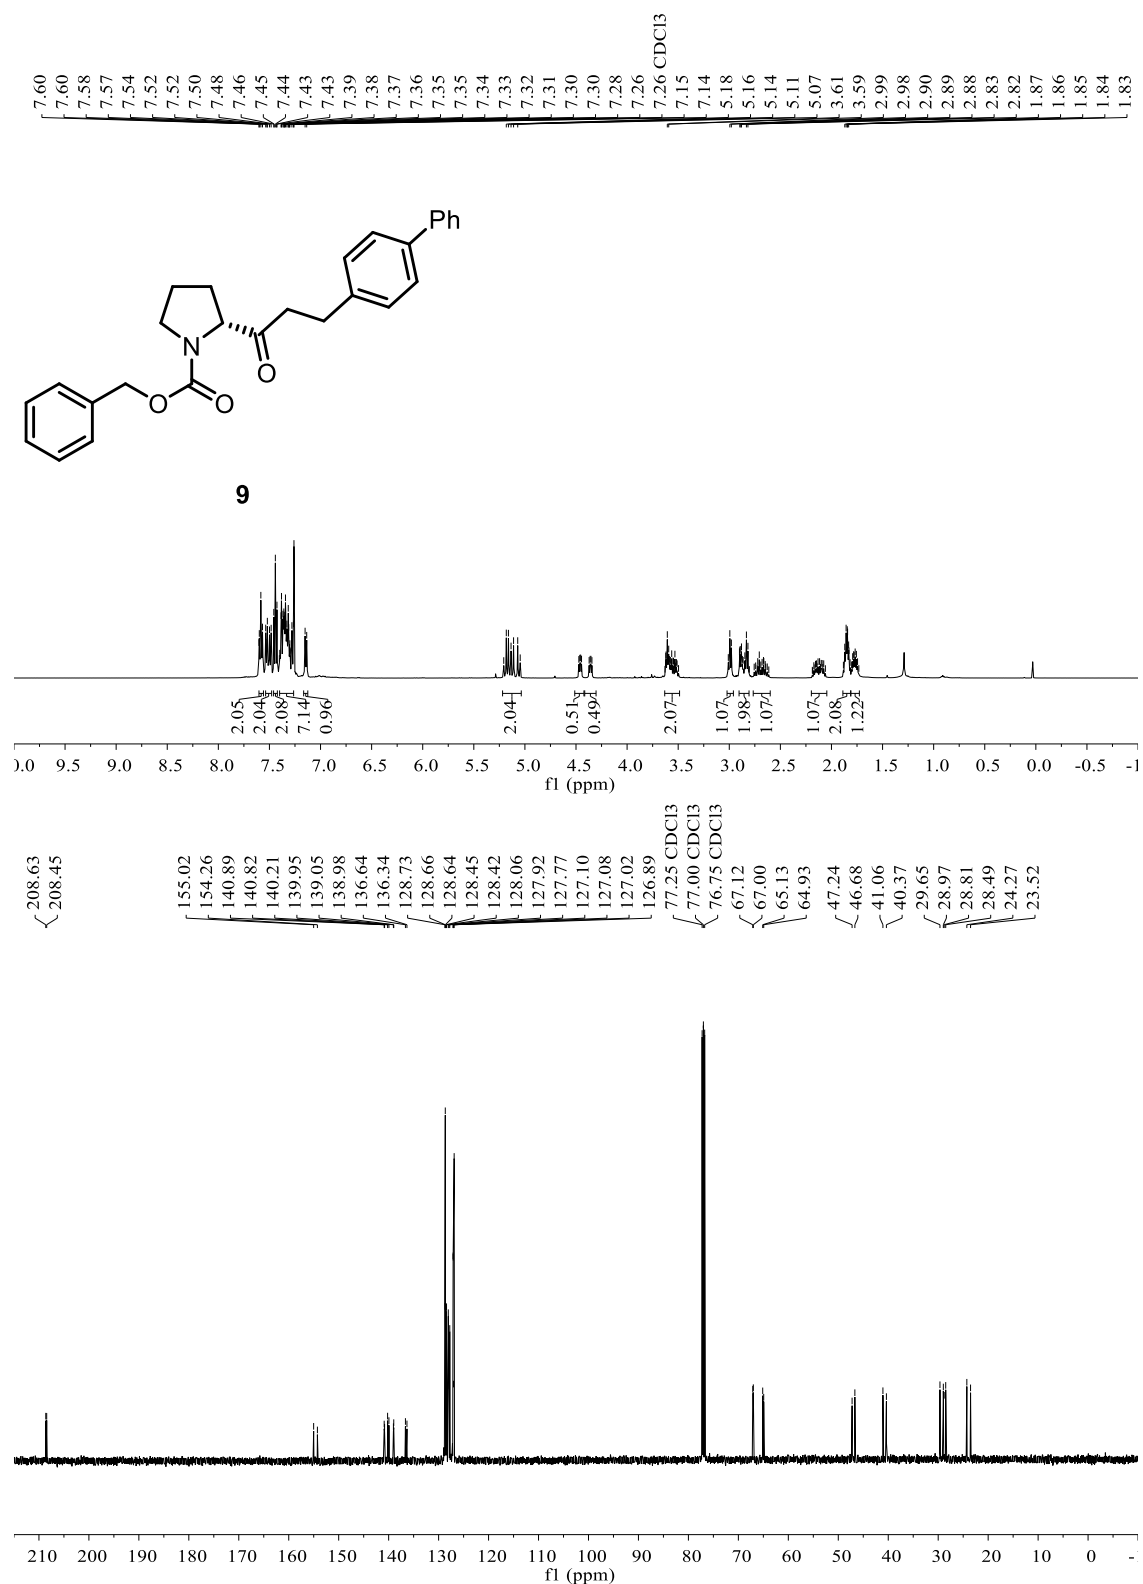

**Supplementary Fig. 15**  $^1\text{H}$  NMR (500 MHz,  $\text{CDCl}_3$ ) and  $^{13}\text{C}$  NMR (126 MHz,  $\text{CDCl}_3$ ) spectrum of **9**.

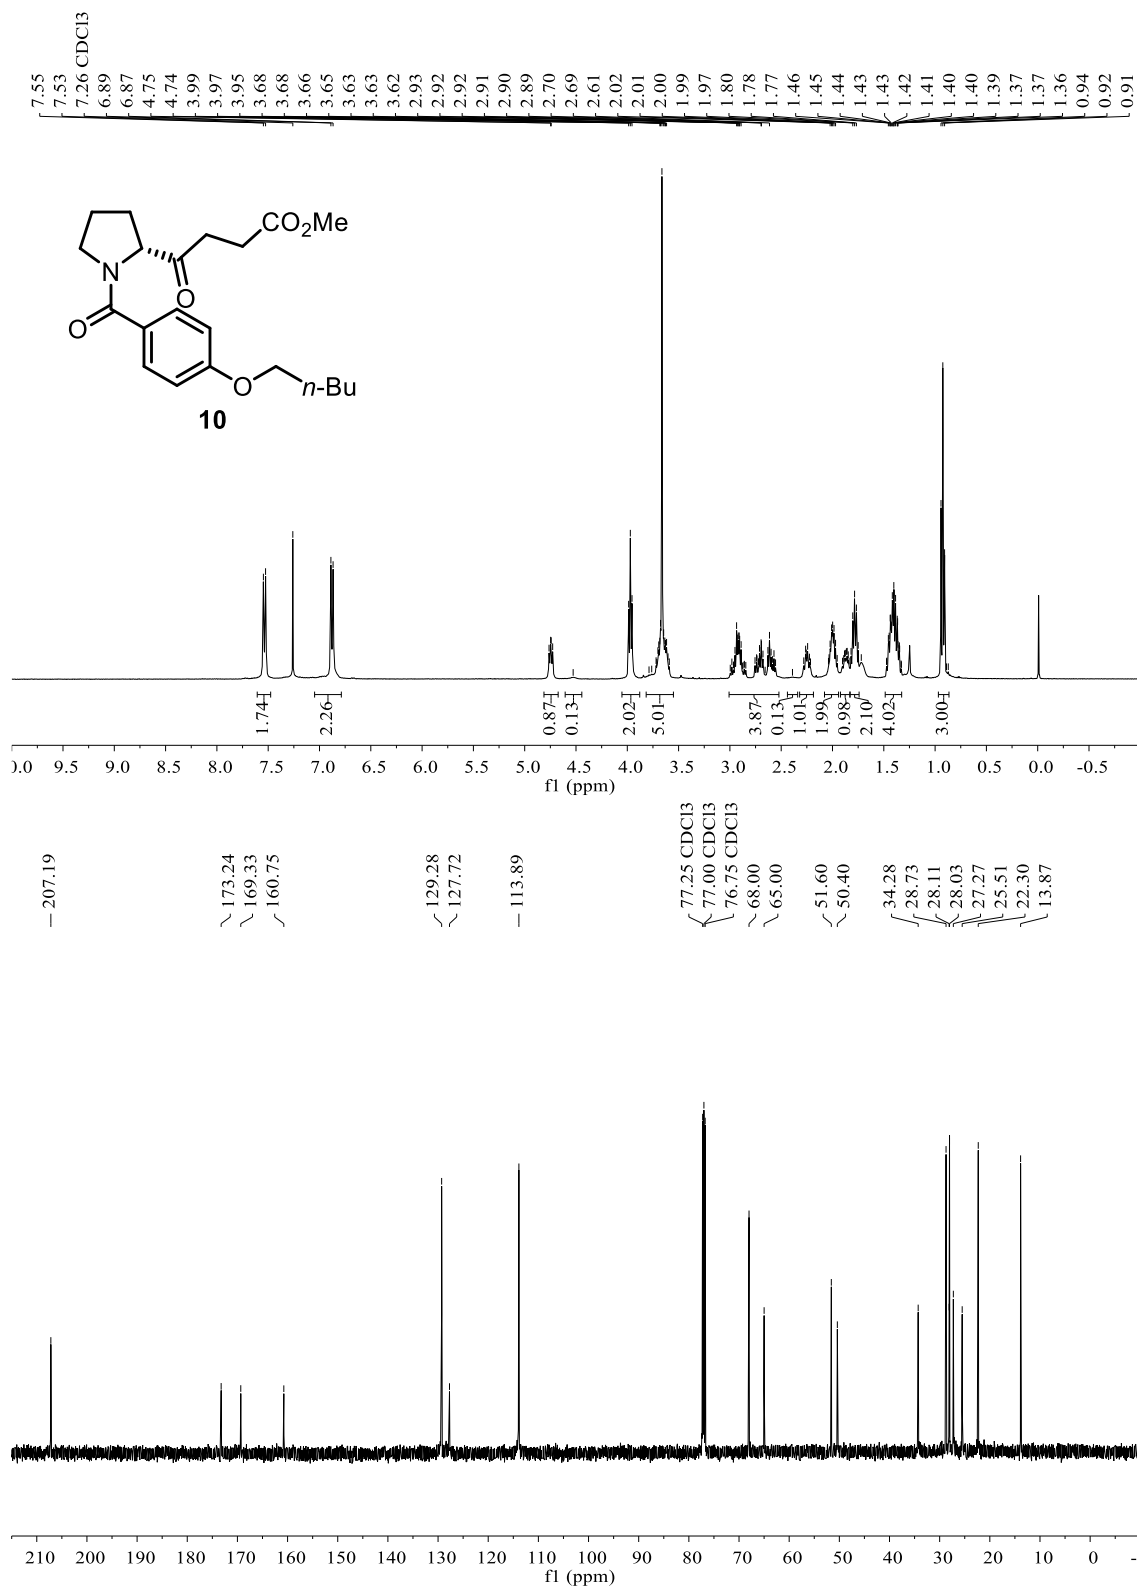

**Supplementary Fig. 16** <sup>1</sup>H NMR (400 MHz, CDCl<sub>3</sub>) and <sup>13</sup>C NMR (126 MHz, CDCl<sub>3</sub>) spectrum of 10.

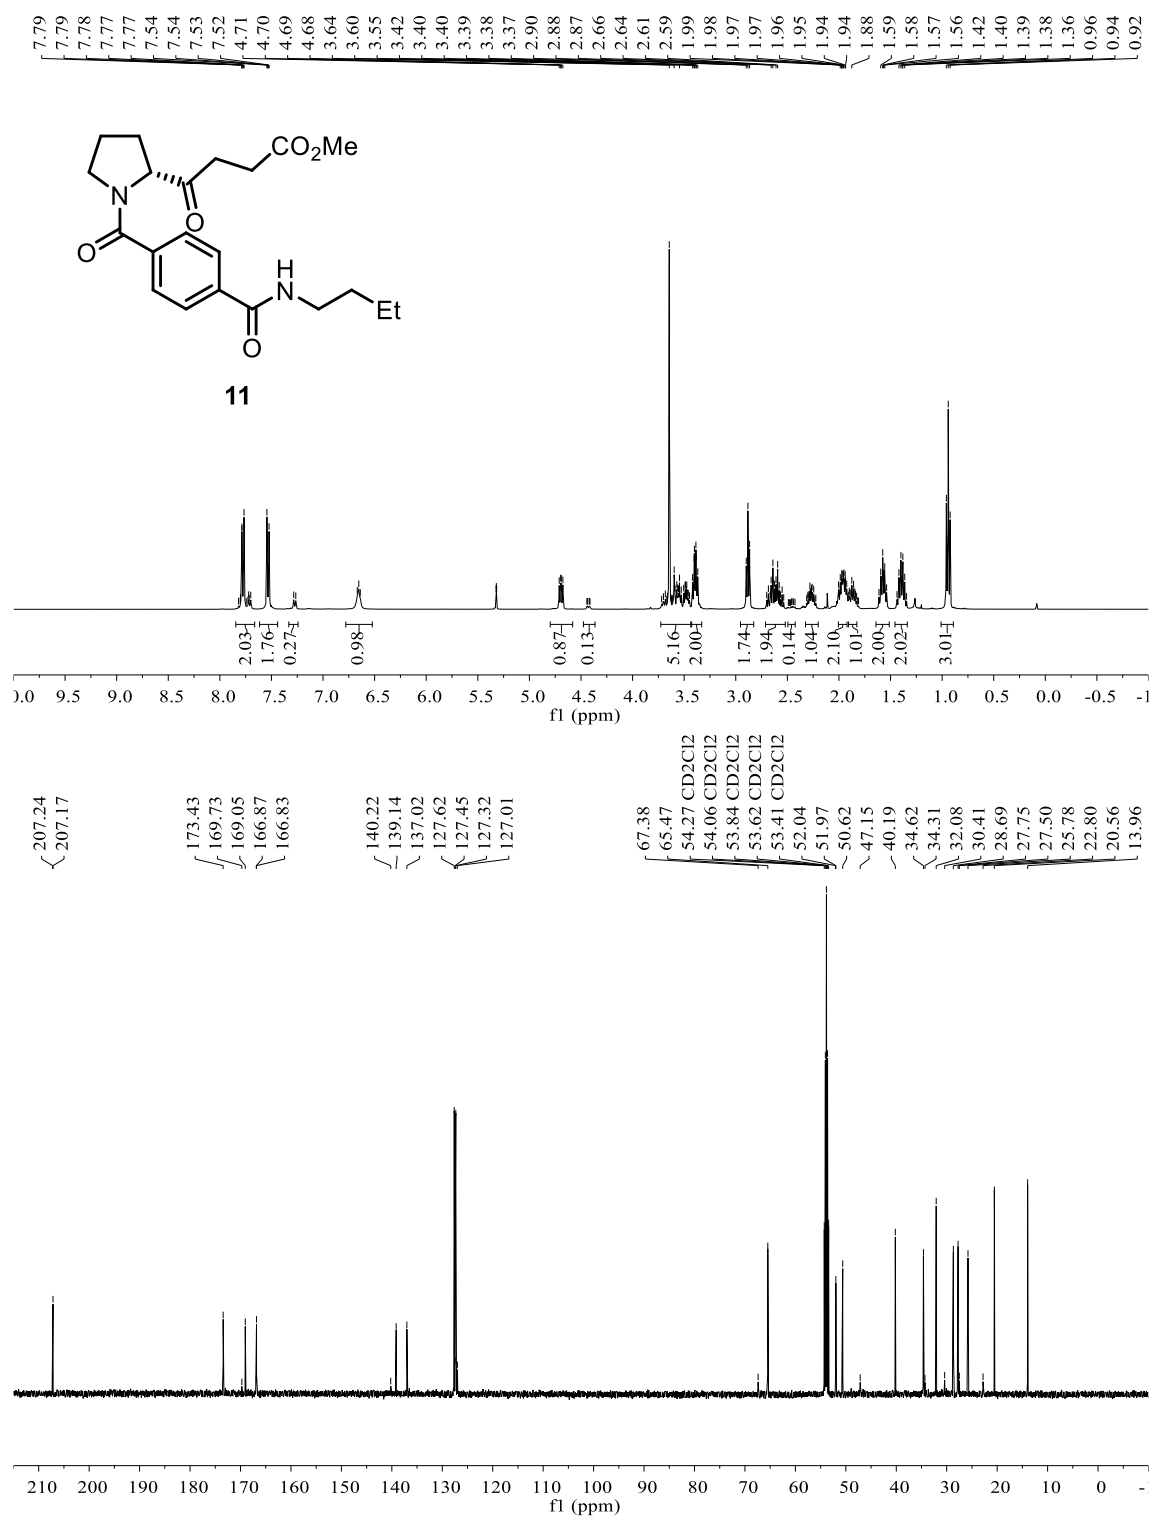

**Supplementary Fig. 17**  $^1\text{H}$  NMR (400 MHz,  $\text{CD}_2\text{Cl}_2$ ) and  $^{13}\text{C}$  NMR (126 MHz,  $\text{CD}_2\text{Cl}_2$ ) spectrum of **11**.

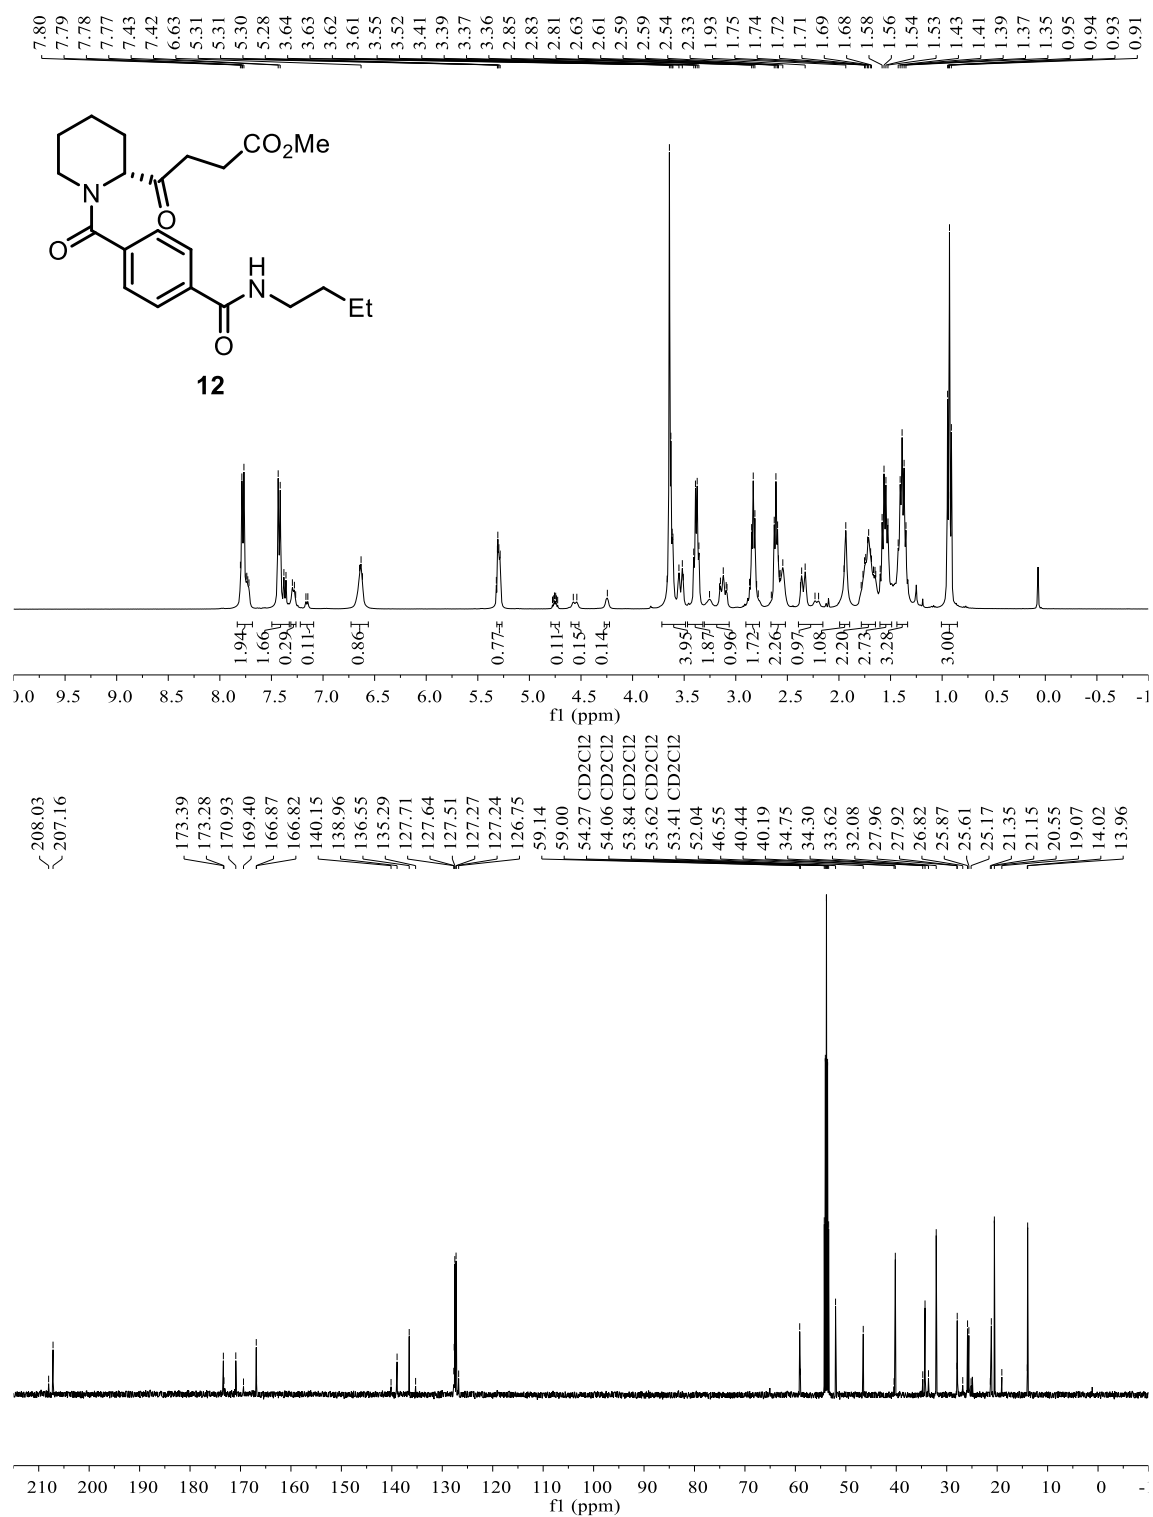

**Supplementary Fig. 18** <sup>1</sup>H NMR (400 MHz, CD<sub>2</sub>Cl<sub>2</sub>) and <sup>13</sup>C NMR (126 MHz, CD<sub>2</sub>Cl<sub>2</sub>) spectrum of **12**.

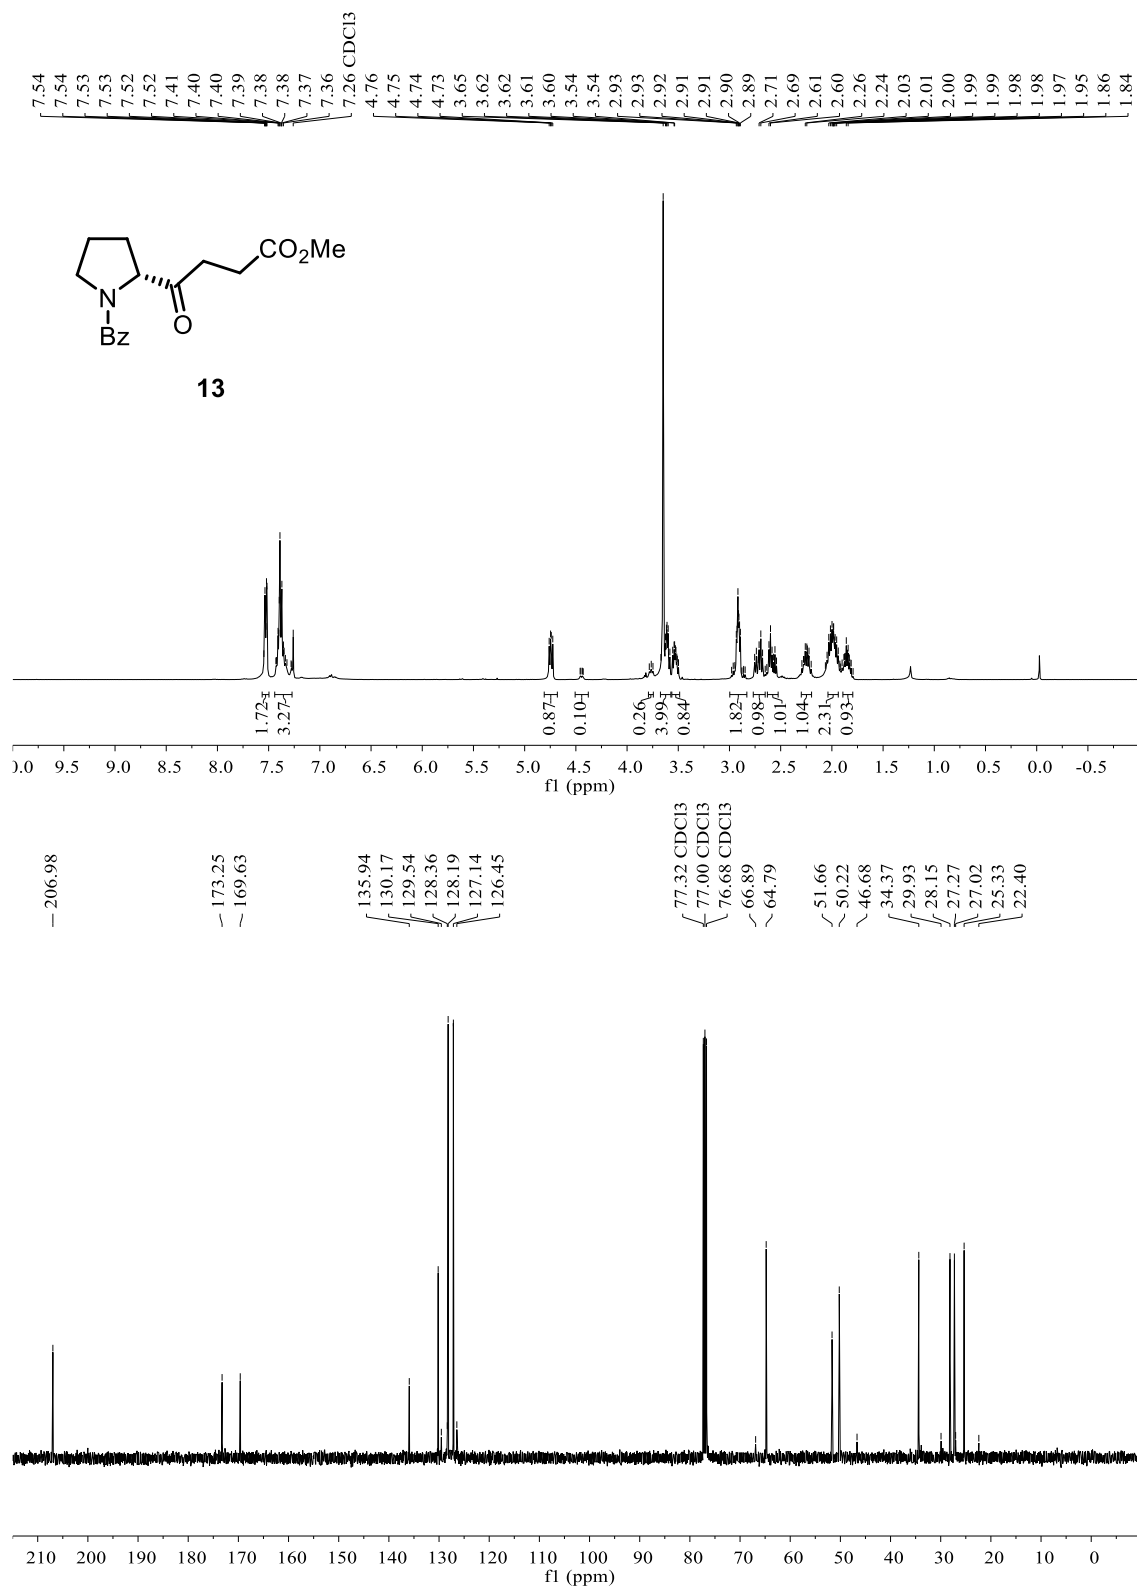

**Supplementary Fig. 19** <sup>1</sup>H NMR (400 MHz, CDCl<sub>3</sub>) and <sup>13</sup>C NMR (101 MHz, CDCl<sub>3</sub>) spectrum of **13**.

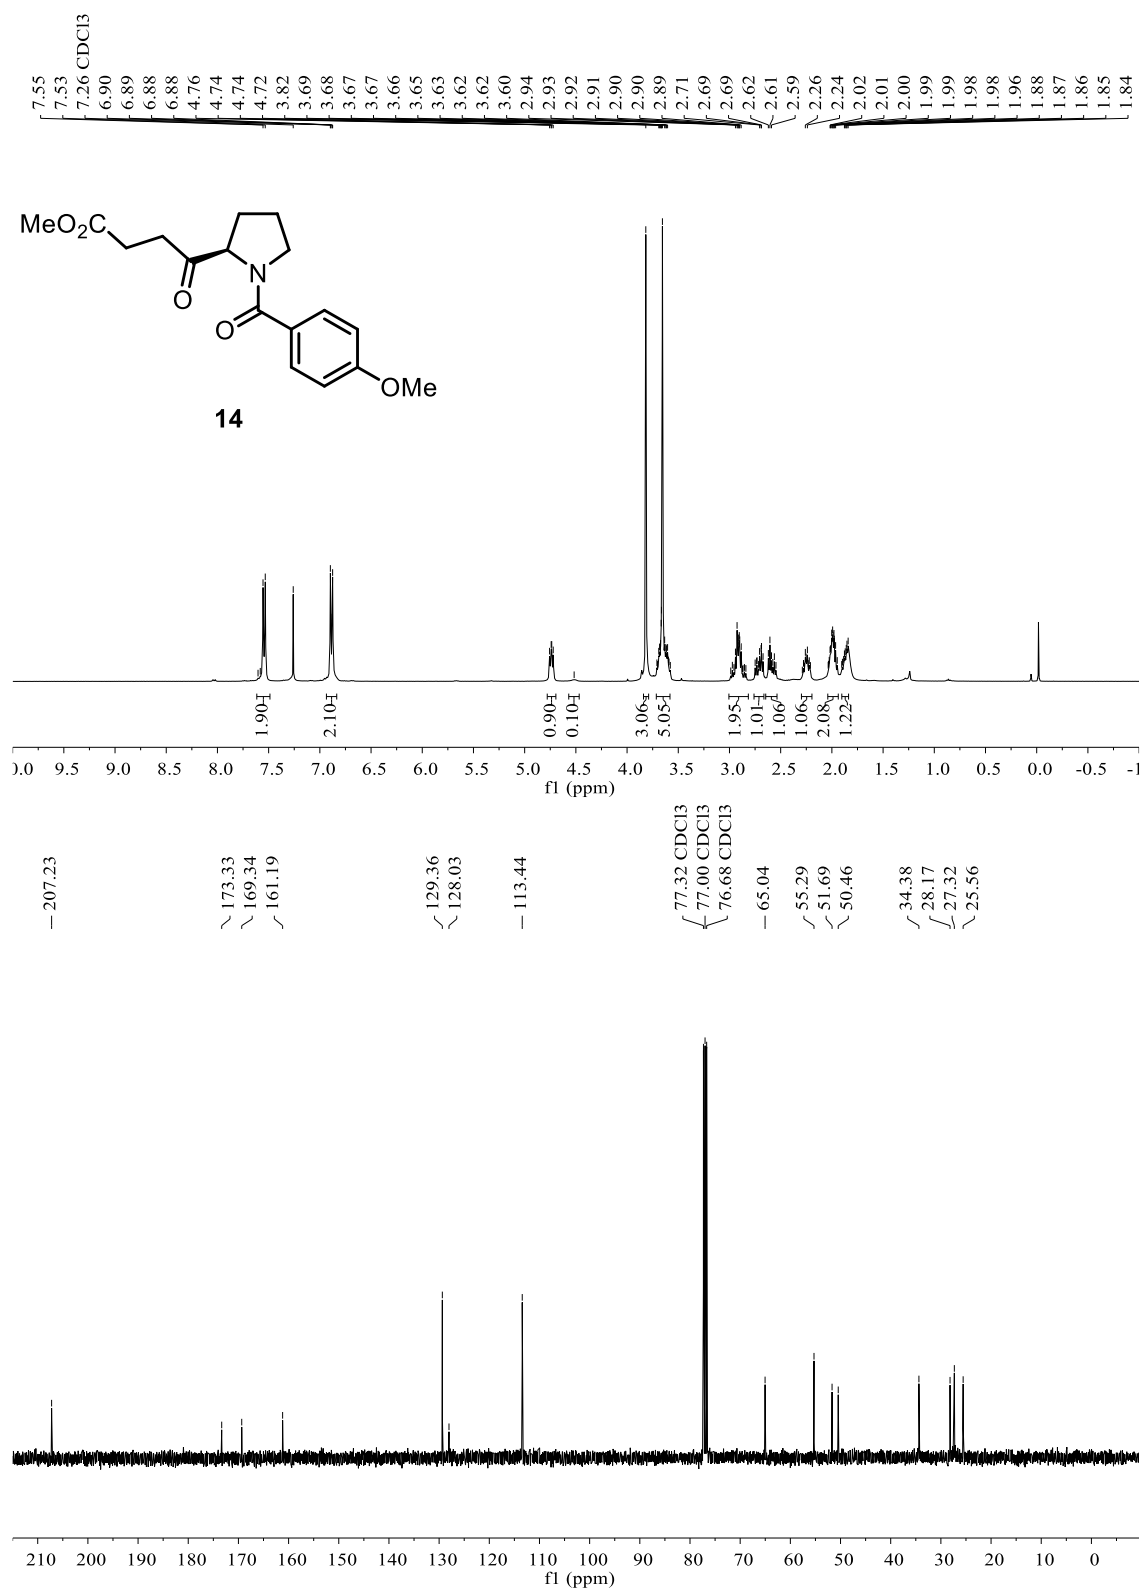

**Supplementary Fig. 20**  $^1\text{H}$  NMR (400 MHz,  $\text{CDCl}_3$ ) and  $^{13}\text{C}$  NMR (101 MHz,  $\text{CDCl}_3$ ) spectrum of **14**.

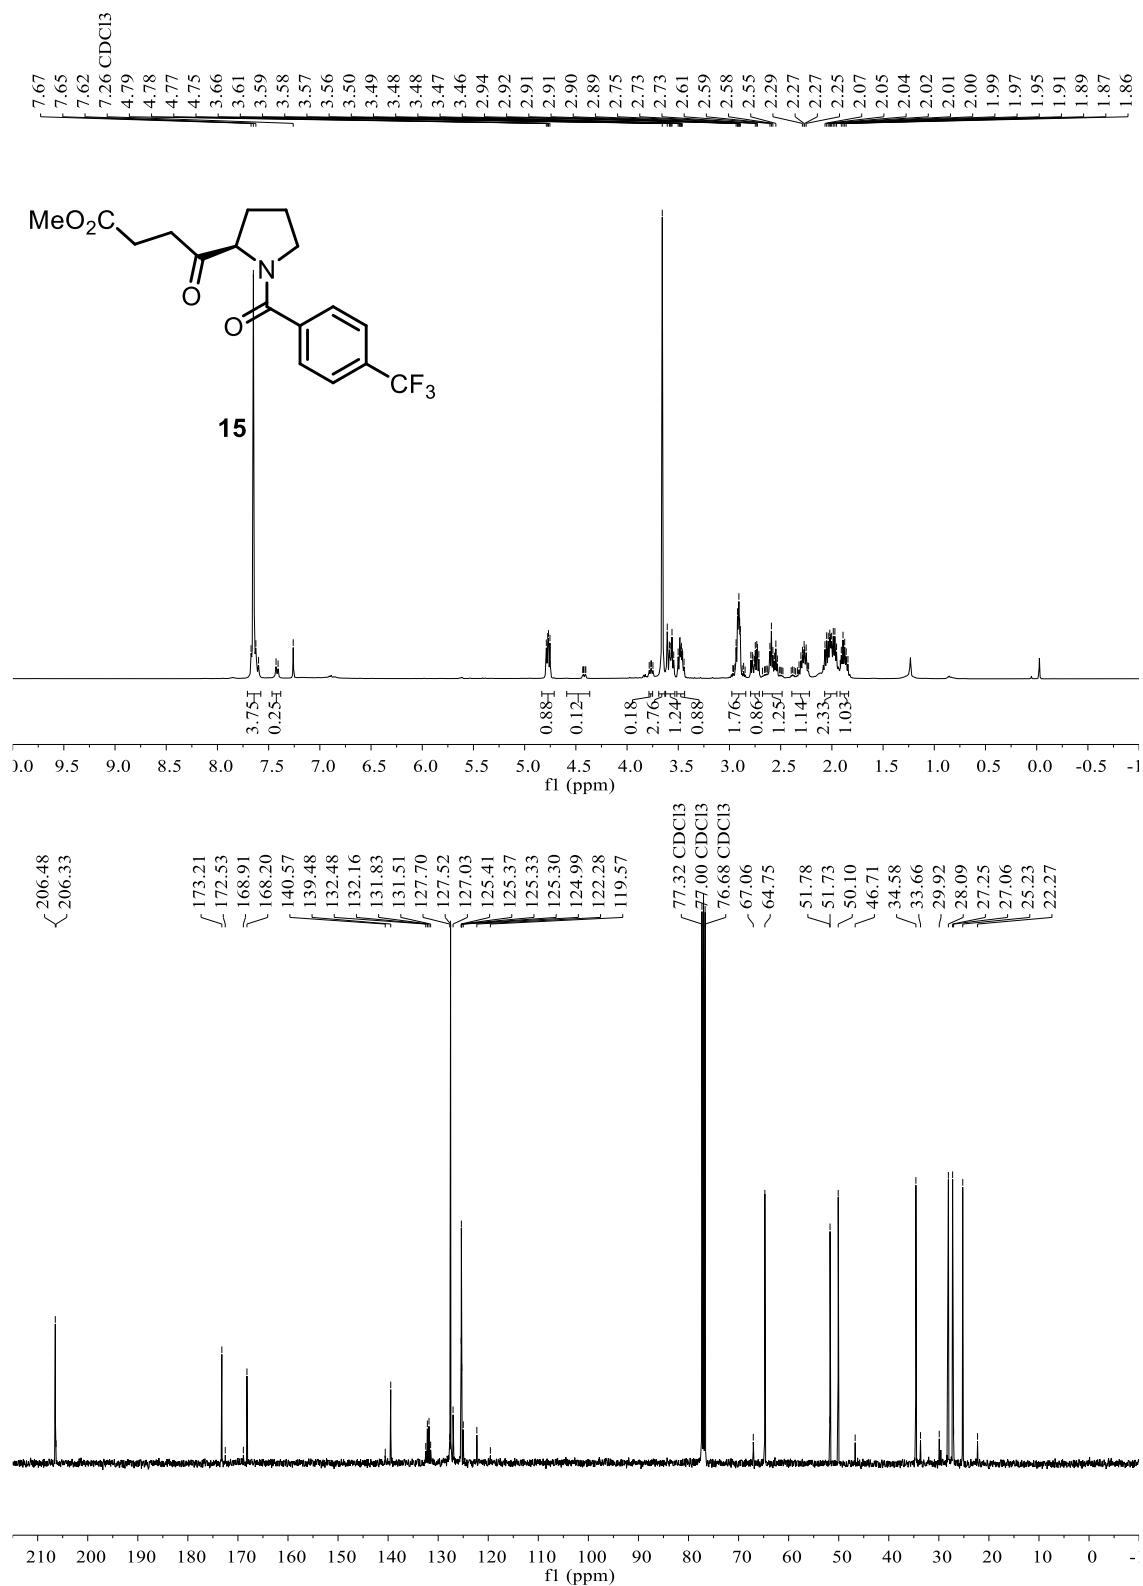

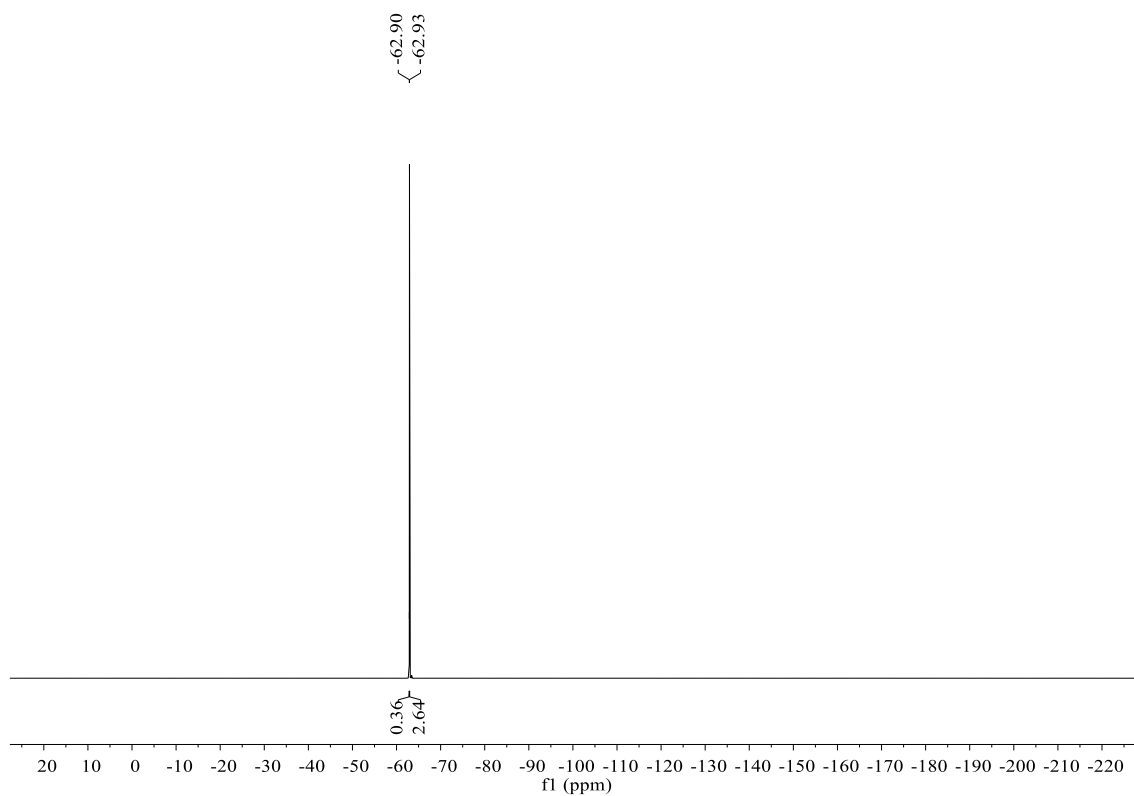

**Supplementary Fig. 21**  $^1\text{H}$  NMR (400 MHz,  $\text{CDCl}_3$ ),  $^{13}\text{C}$  NMR (101 MHz,  $\text{CDCl}_3$ ) and  $^{19}\text{F}$  NMR (376 MHz,  $\text{CDCl}_3$ ) spectrum of **15**.

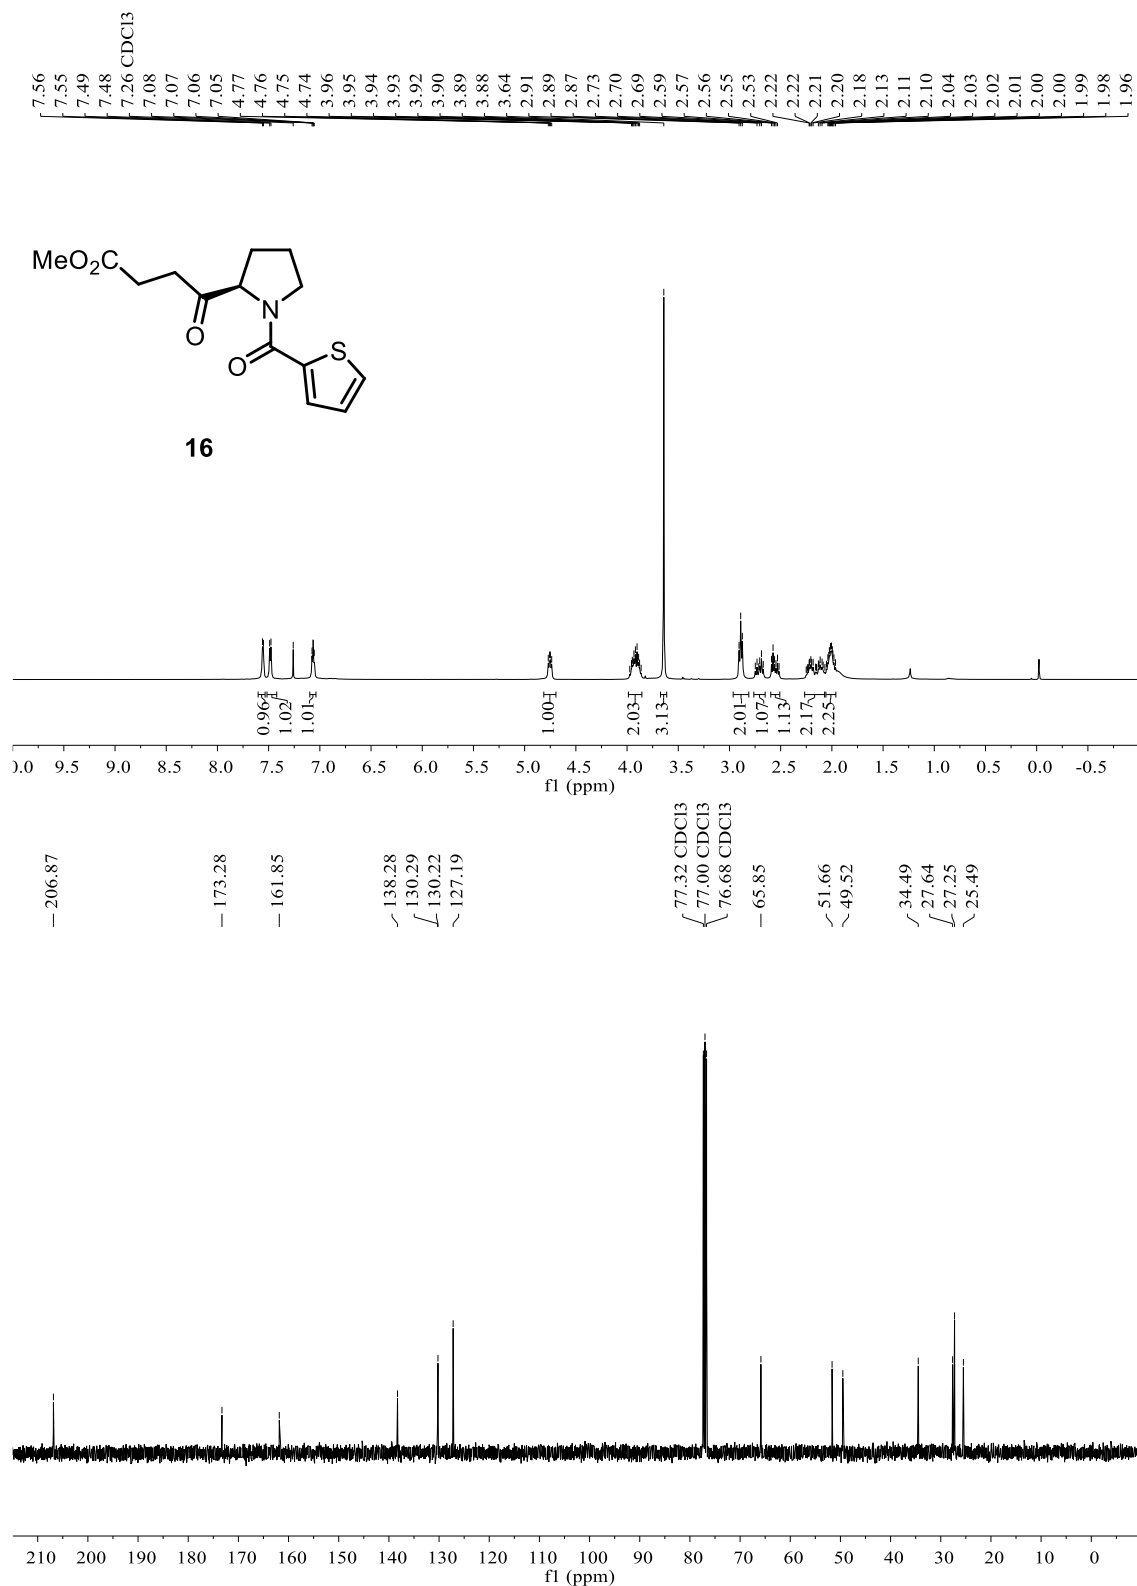

**Supplementary Fig. 22** <sup>1</sup>H NMR (400 MHz, CDCl<sub>3</sub>) and <sup>13</sup>C NMR (101 MHz, CDCl<sub>3</sub>) spectrum of **16**.

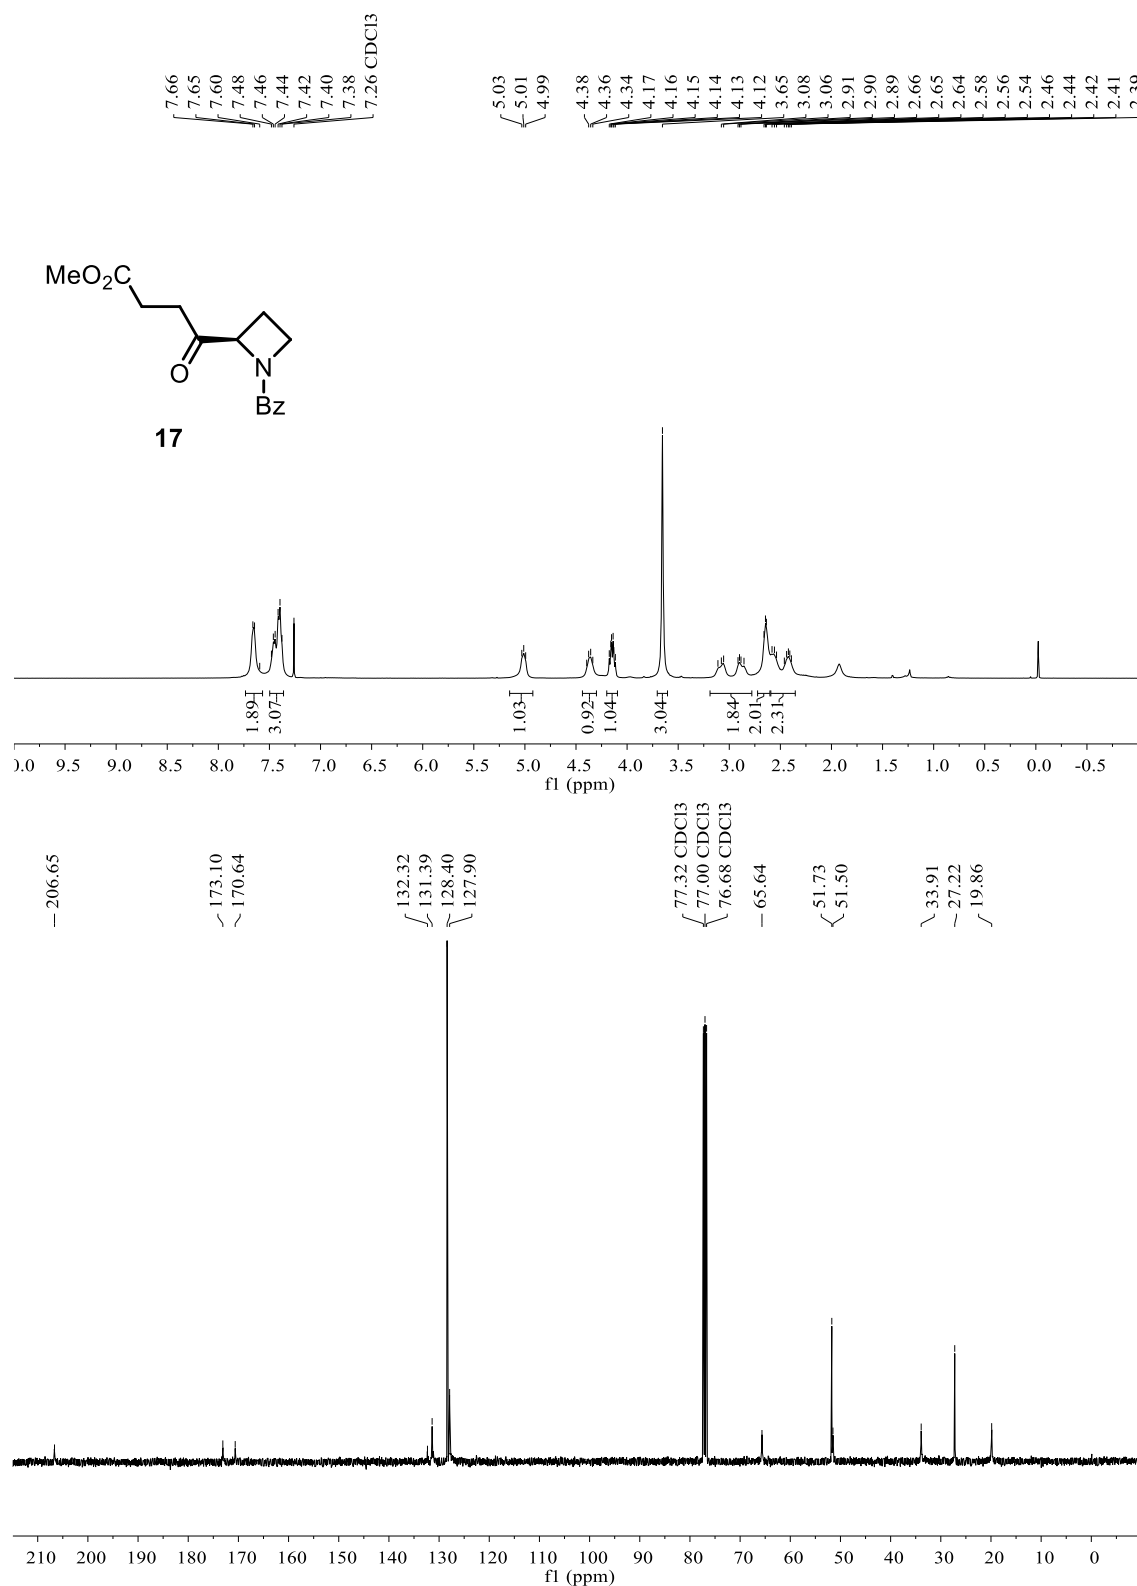

**Supplementary Fig. 23** <sup>1</sup>H NMR (400 MHz, CDCl<sub>3</sub>) and <sup>13</sup>C NMR (101 MHz, CDCl<sub>3</sub>) spectrum of **17**.

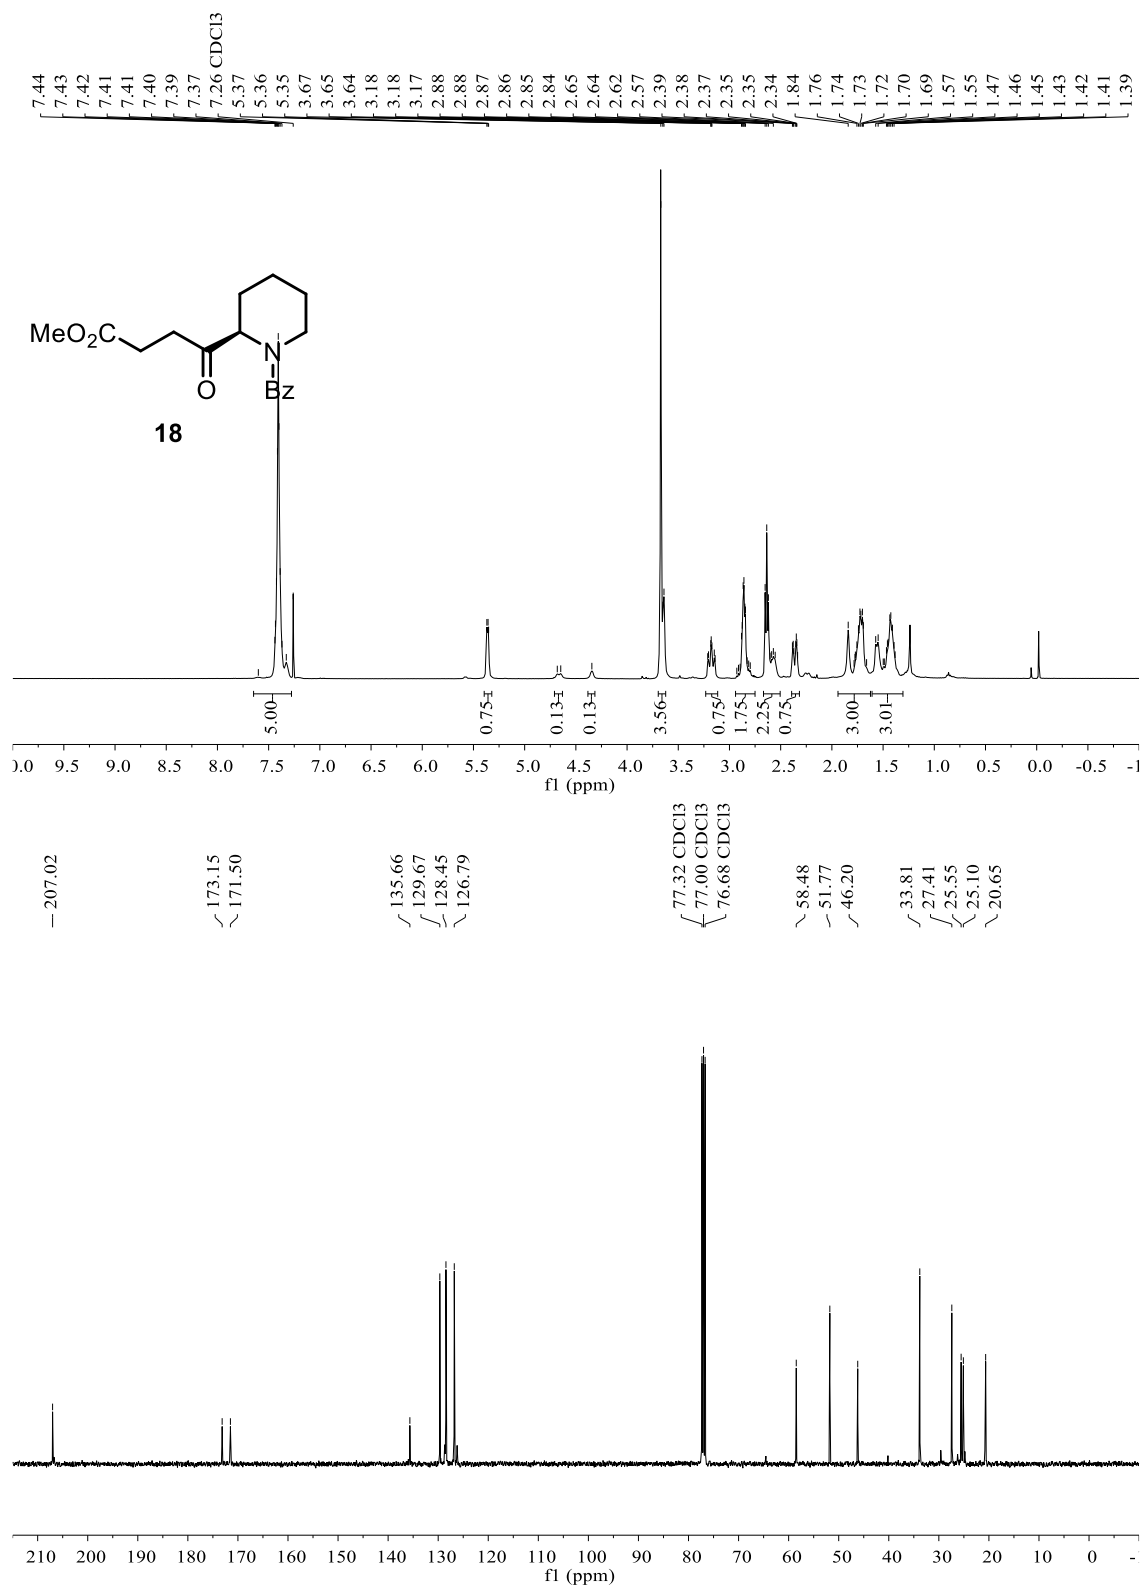

**Supplementary Fig. 24**  $^1\text{H}$  NMR (400 MHz,  $\text{CDCl}_3$ ) and  $^{13}\text{C}$  NMR (101 MHz,  $\text{CDCl}_3$ ) spectrum of **18**.

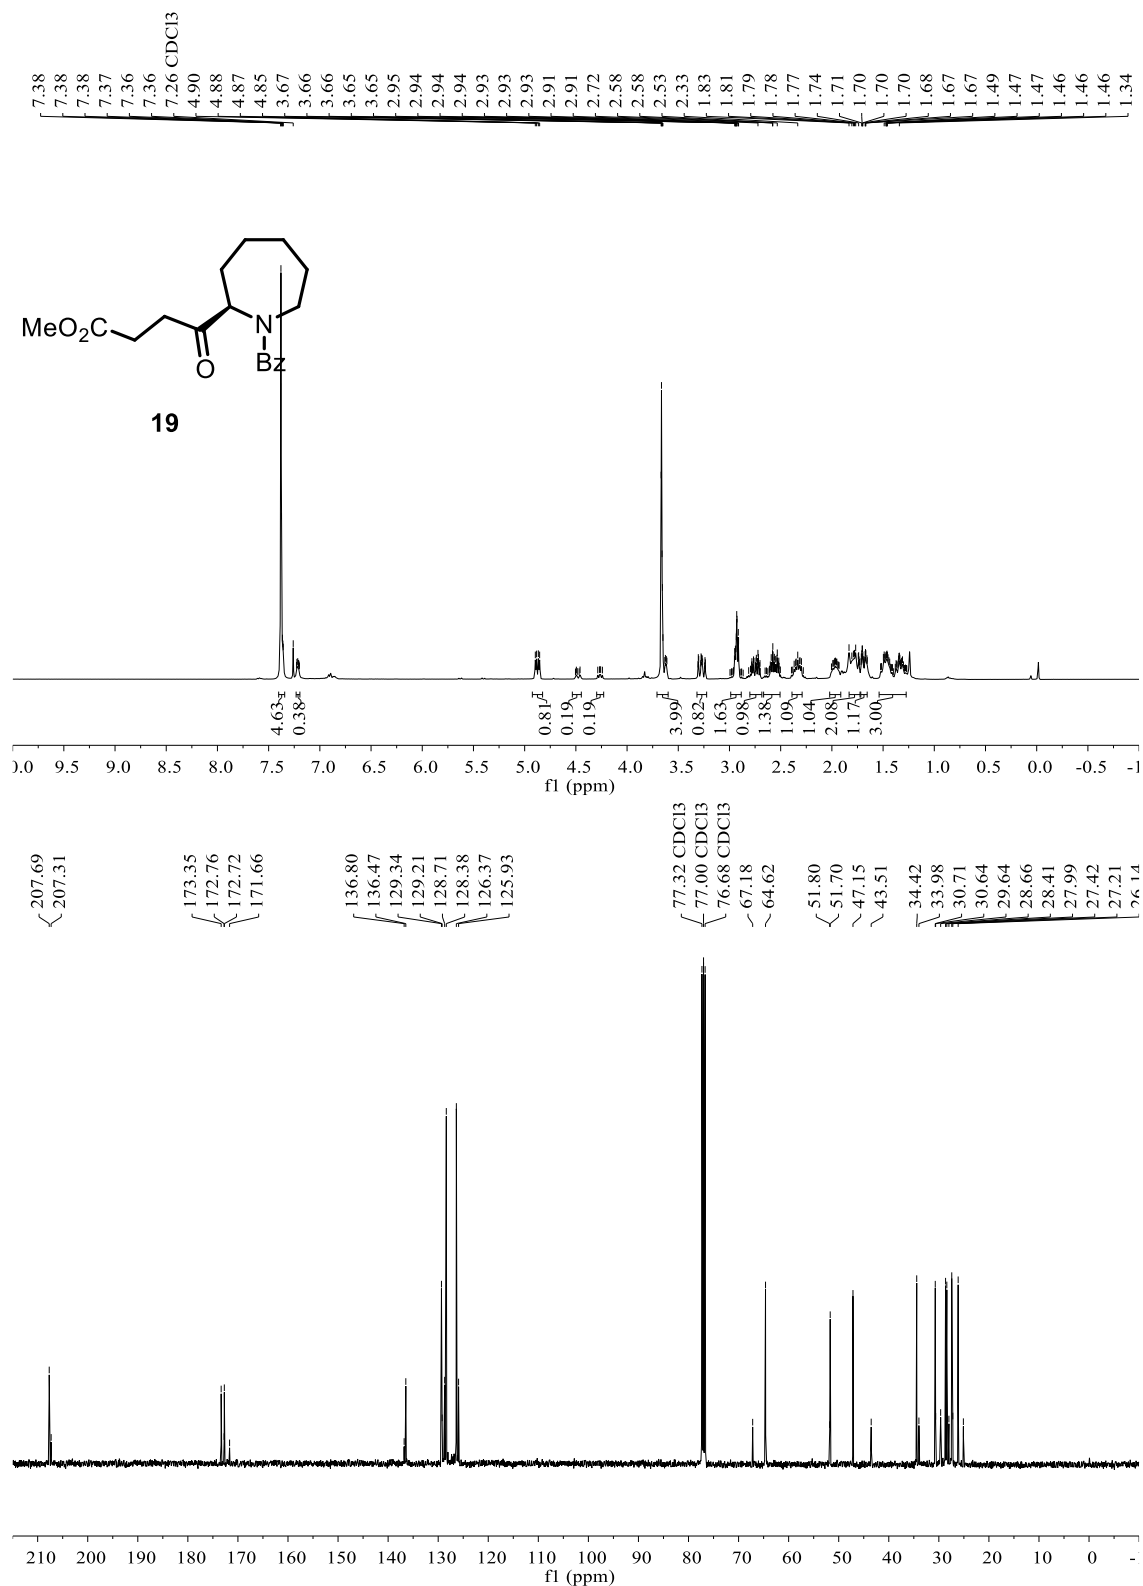

**Supplementary Fig. 25**  $^1\text{H}$  NMR (400 MHz,  $\text{CDCl}_3$ ) and  $^{13}\text{C}$  NMR (101 MHz,  $\text{CDCl}_3$ ) spectrum of **19**.

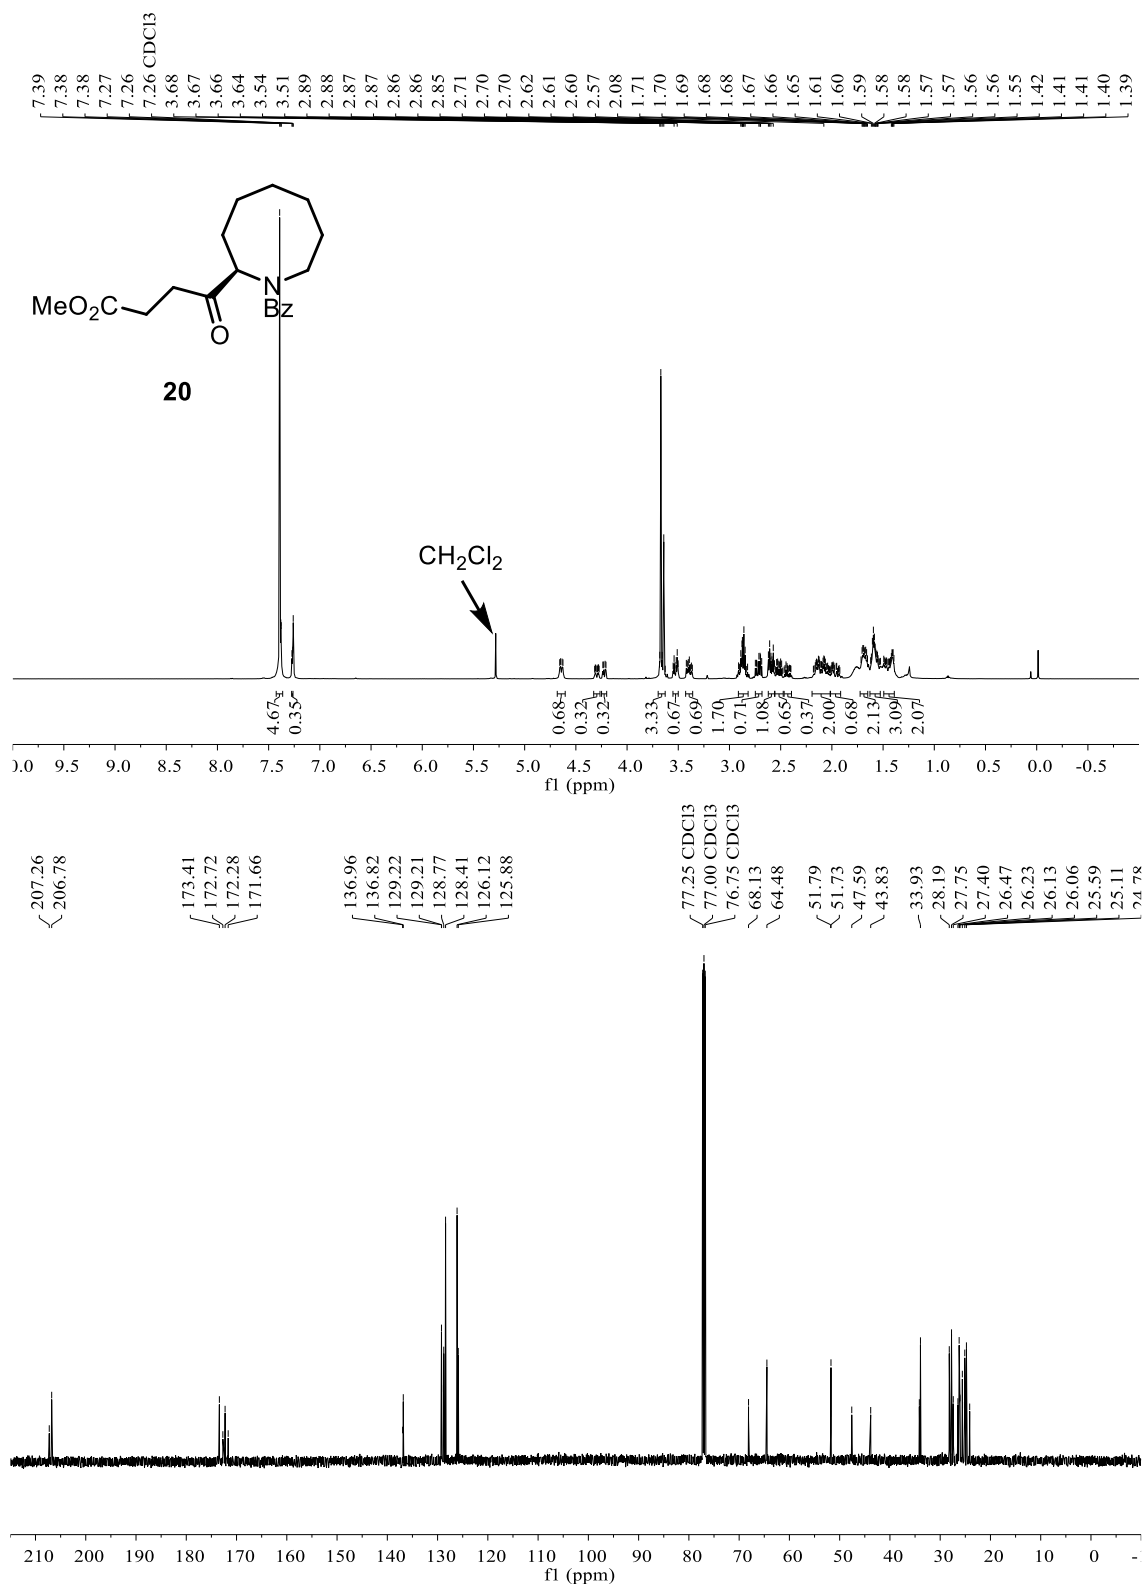

**Supplementary Fig. 26**  $^1\text{H}$  NMR (500 MHz, CDCl<sub>3</sub>) and  $^{13}\text{C}$  NMR (126 MHz, CDCl<sub>3</sub>) spectrum of **20**.

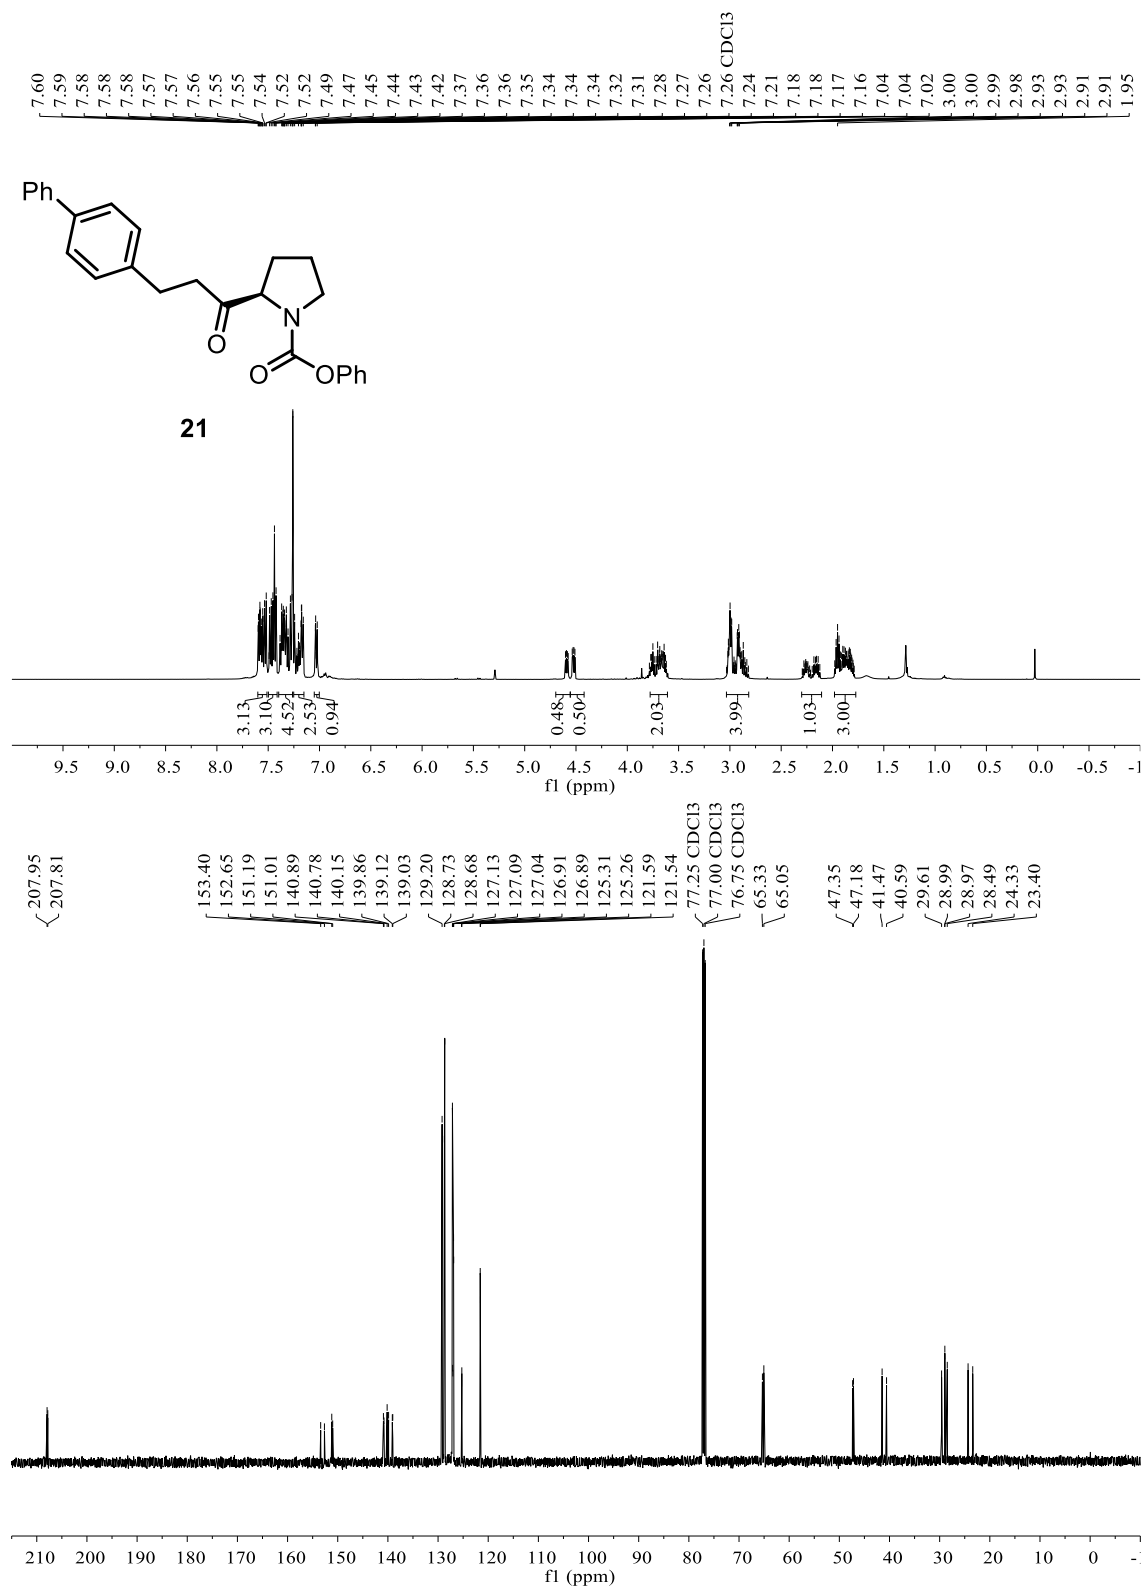

**Supplementary Fig. 27** <sup>1</sup>H NMR (500 MHz, CDCl<sub>3</sub>) and <sup>13</sup>C NMR (126 MHz, CDCl<sub>3</sub>) spectrum of 21.

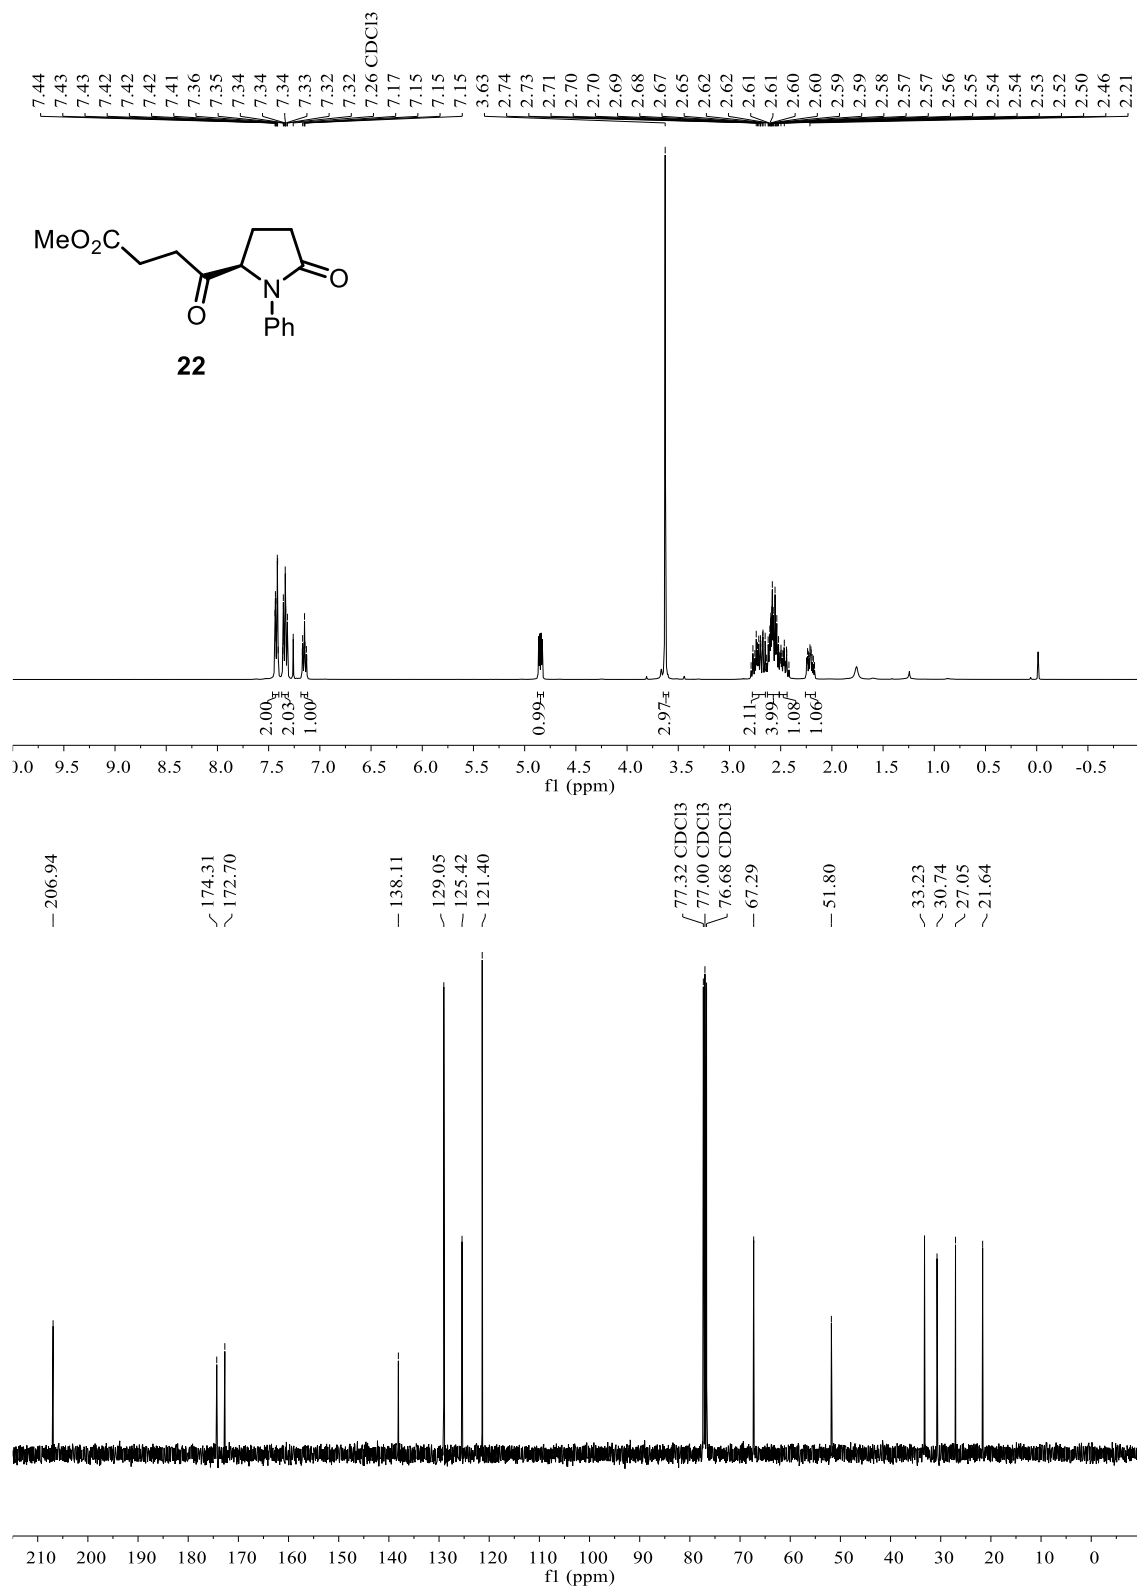

**Supplementary Fig. 28**  $^1\text{H}$  NMR (400 MHz,  $\text{CDCl}_3$ ) and  $^{13}\text{C}$  NMR (101 MHz,  $\text{CDCl}_3$ ) spectrum of **22**.

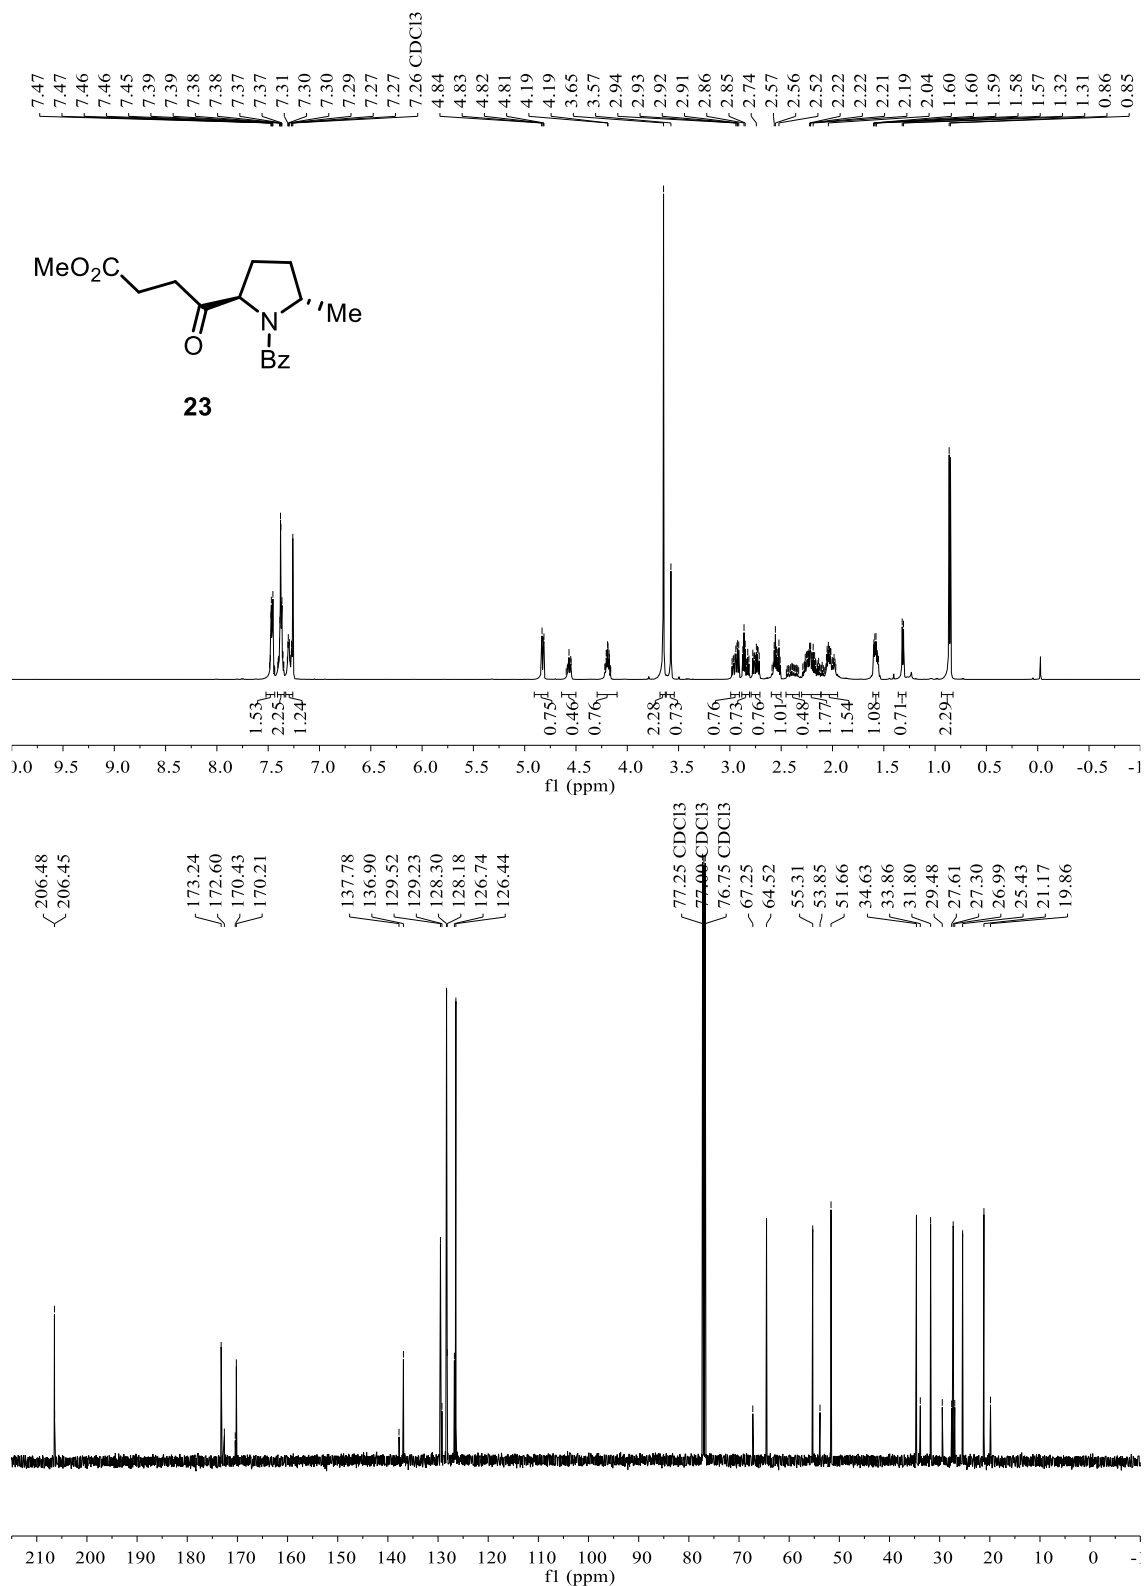

**Supplementary Fig. 29**  $^1\text{H}$  NMR (500 MHz,  $\text{CDCl}_3$ ) and  $^{13}\text{C}$  NMR (126 MHz,  $\text{CDCl}_3$ ) spectrum of **23**.

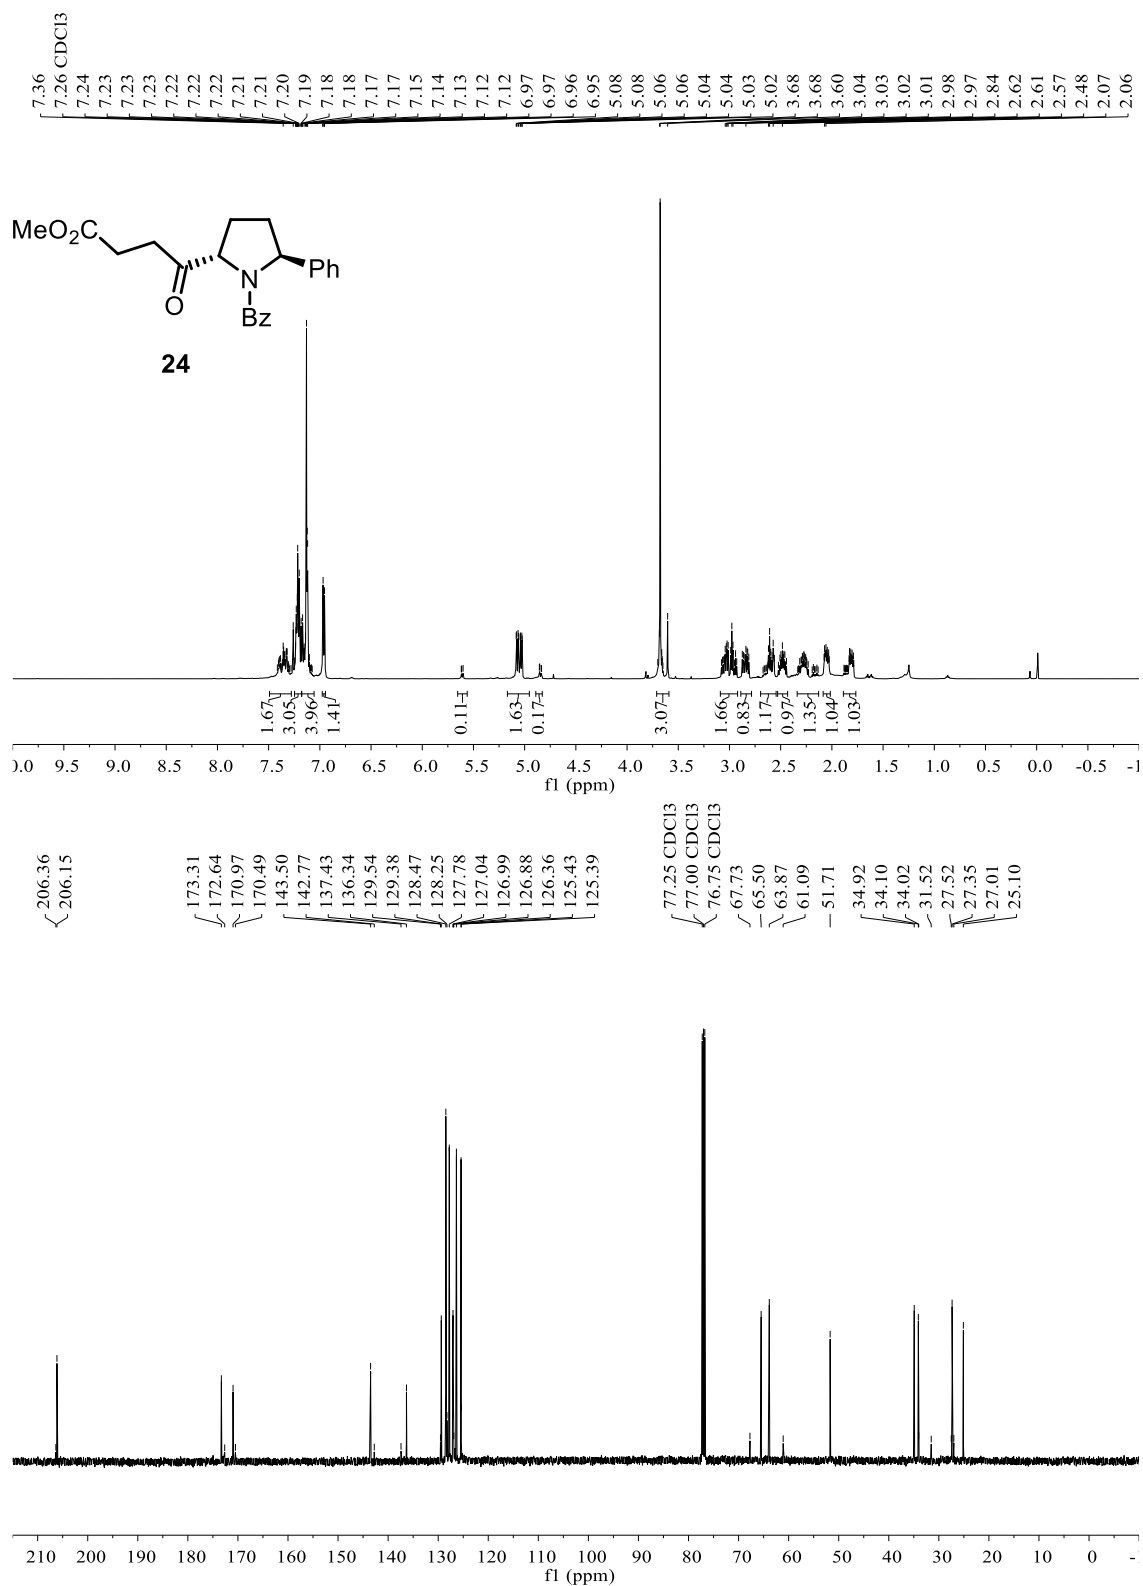

**Supplementary Fig. 30**  $^1\text{H}$  NMR (500 MHz, CDCl<sub>3</sub>) and  $^{13}\text{C}$  NMR (126 MHz, CDCl<sub>3</sub>) spectrum of **24**.

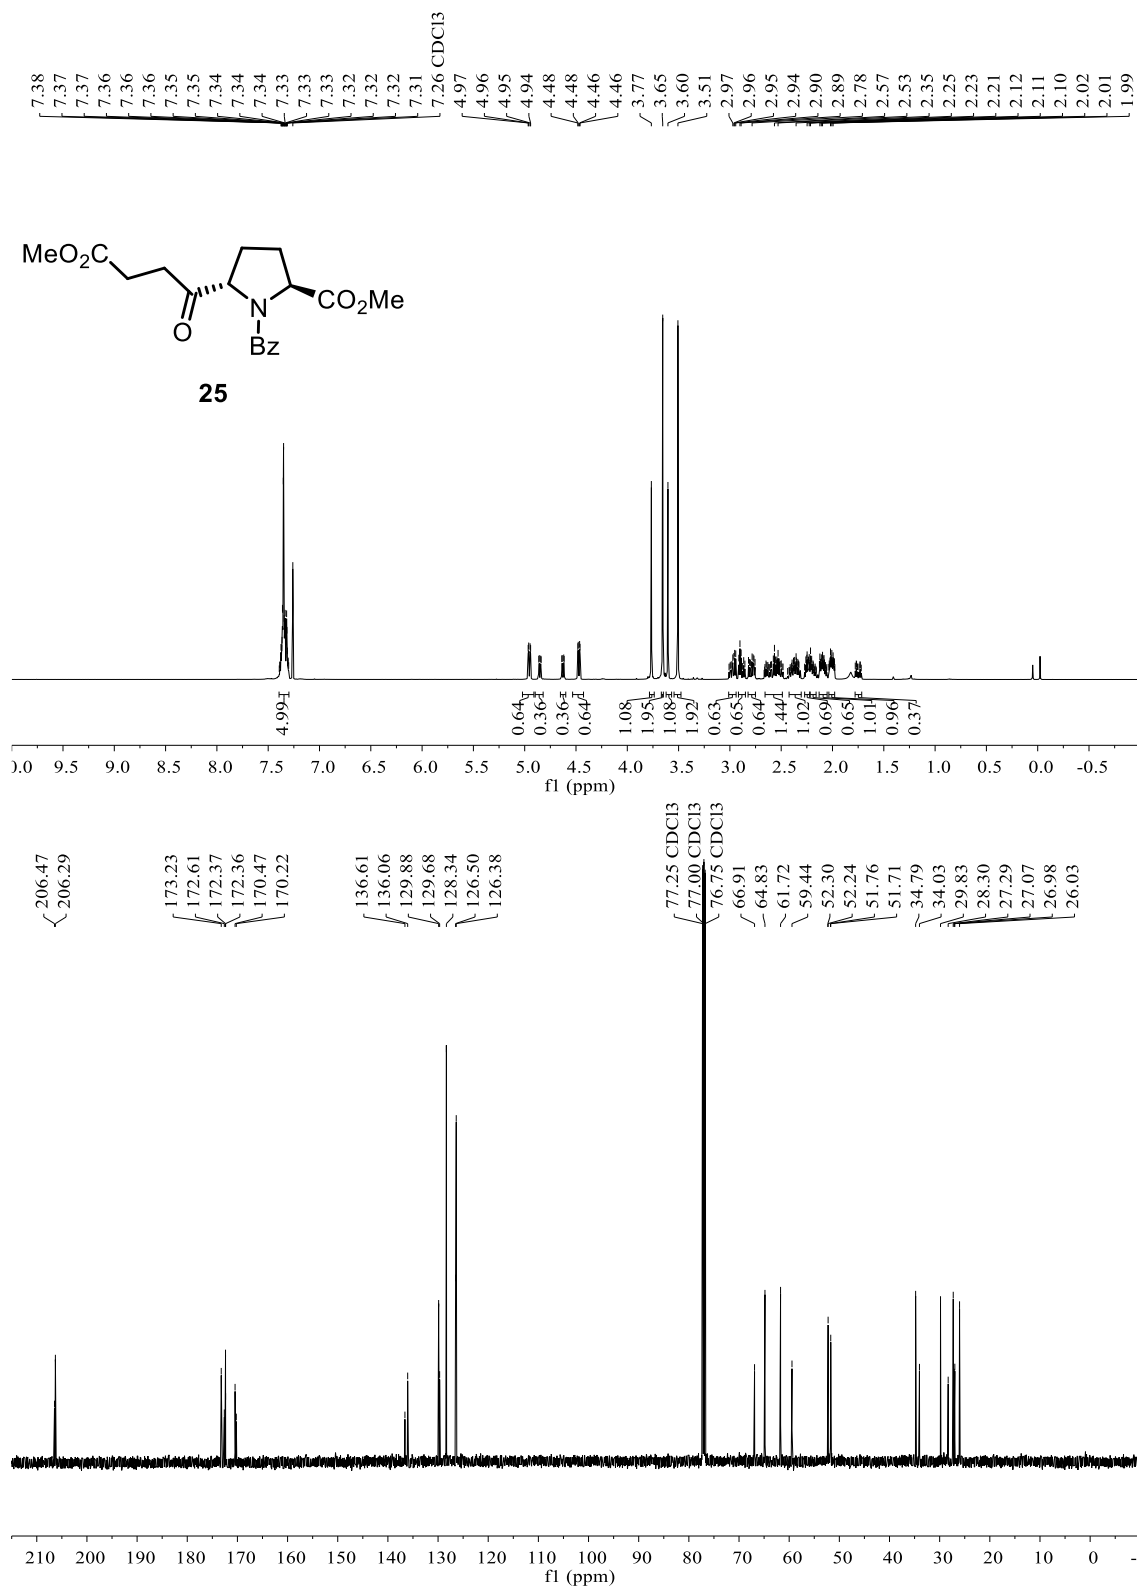

**Supplementary Fig. 31**  $^1\text{H}$  NMR (500 MHz,  $\text{CDCl}_3$ ) and  $^{13}\text{C}$  NMR (126 MHz,  $\text{CDCl}_3$ ) spectrum of **25**.

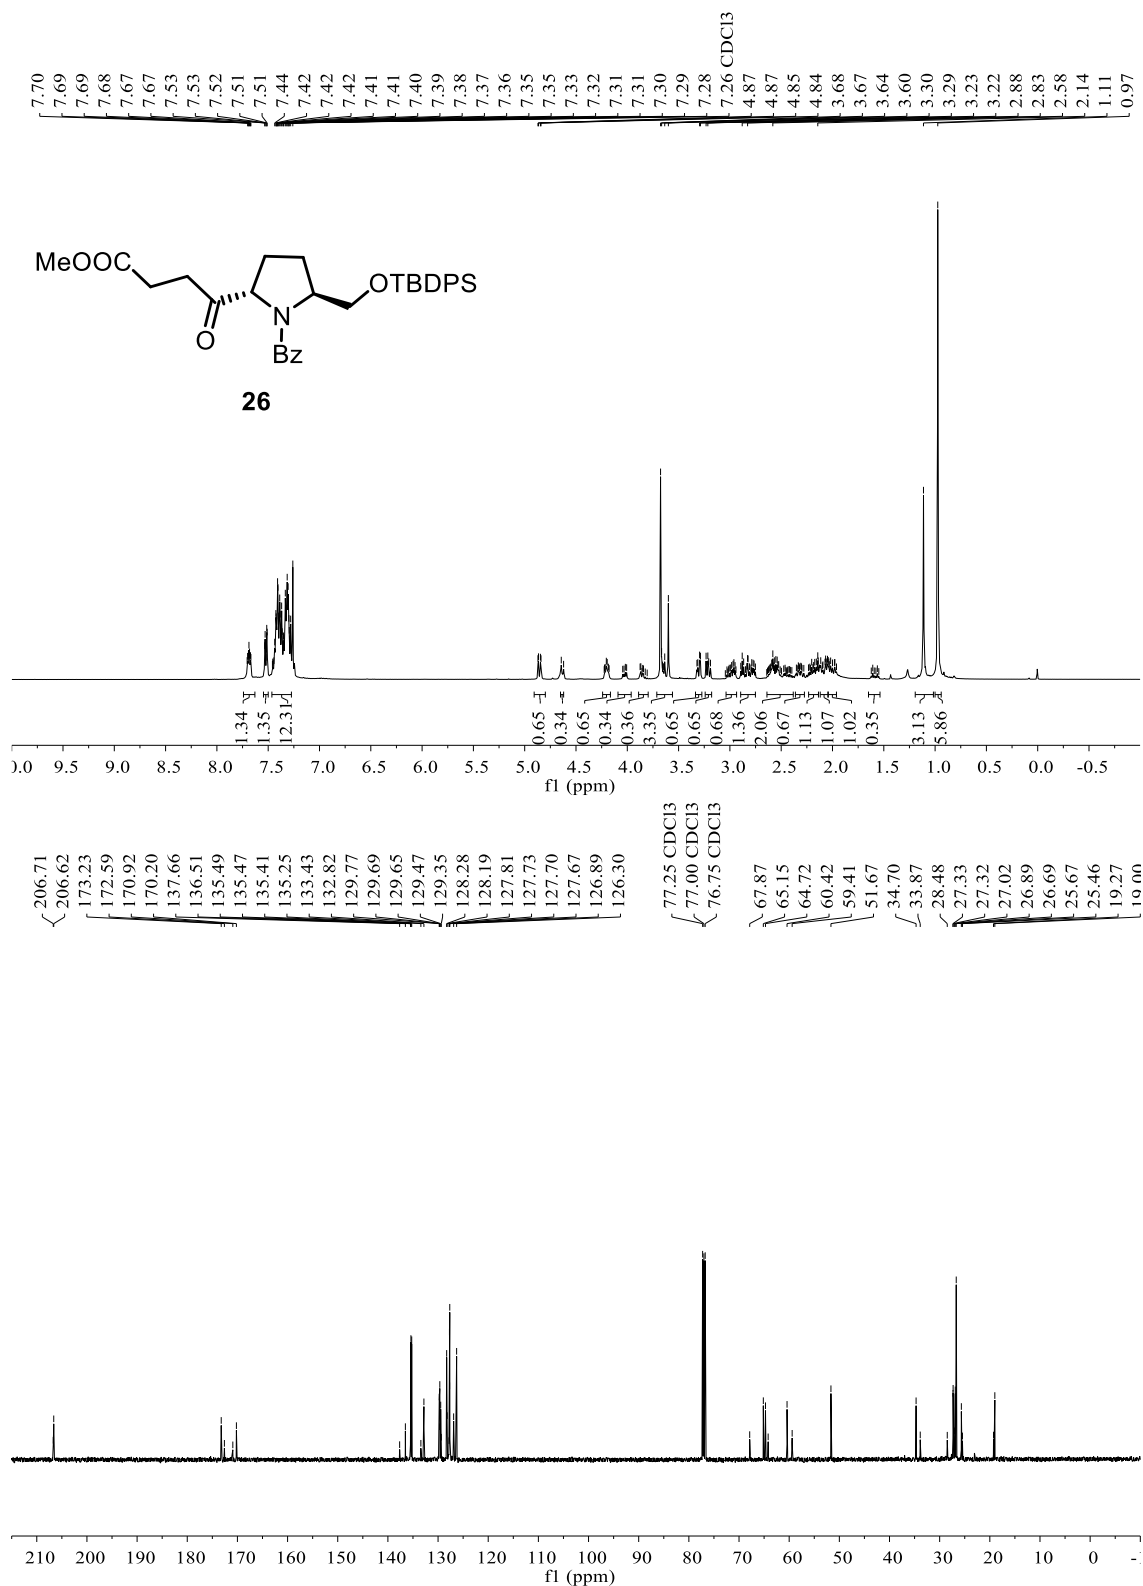

**Supplementary Fig. 32** <sup>1</sup>H NMR (400 MHz, CDCl<sub>3</sub>) and <sup>13</sup>C NMR (126 MHz, CDCl<sub>3</sub>) spectrum of **26**.

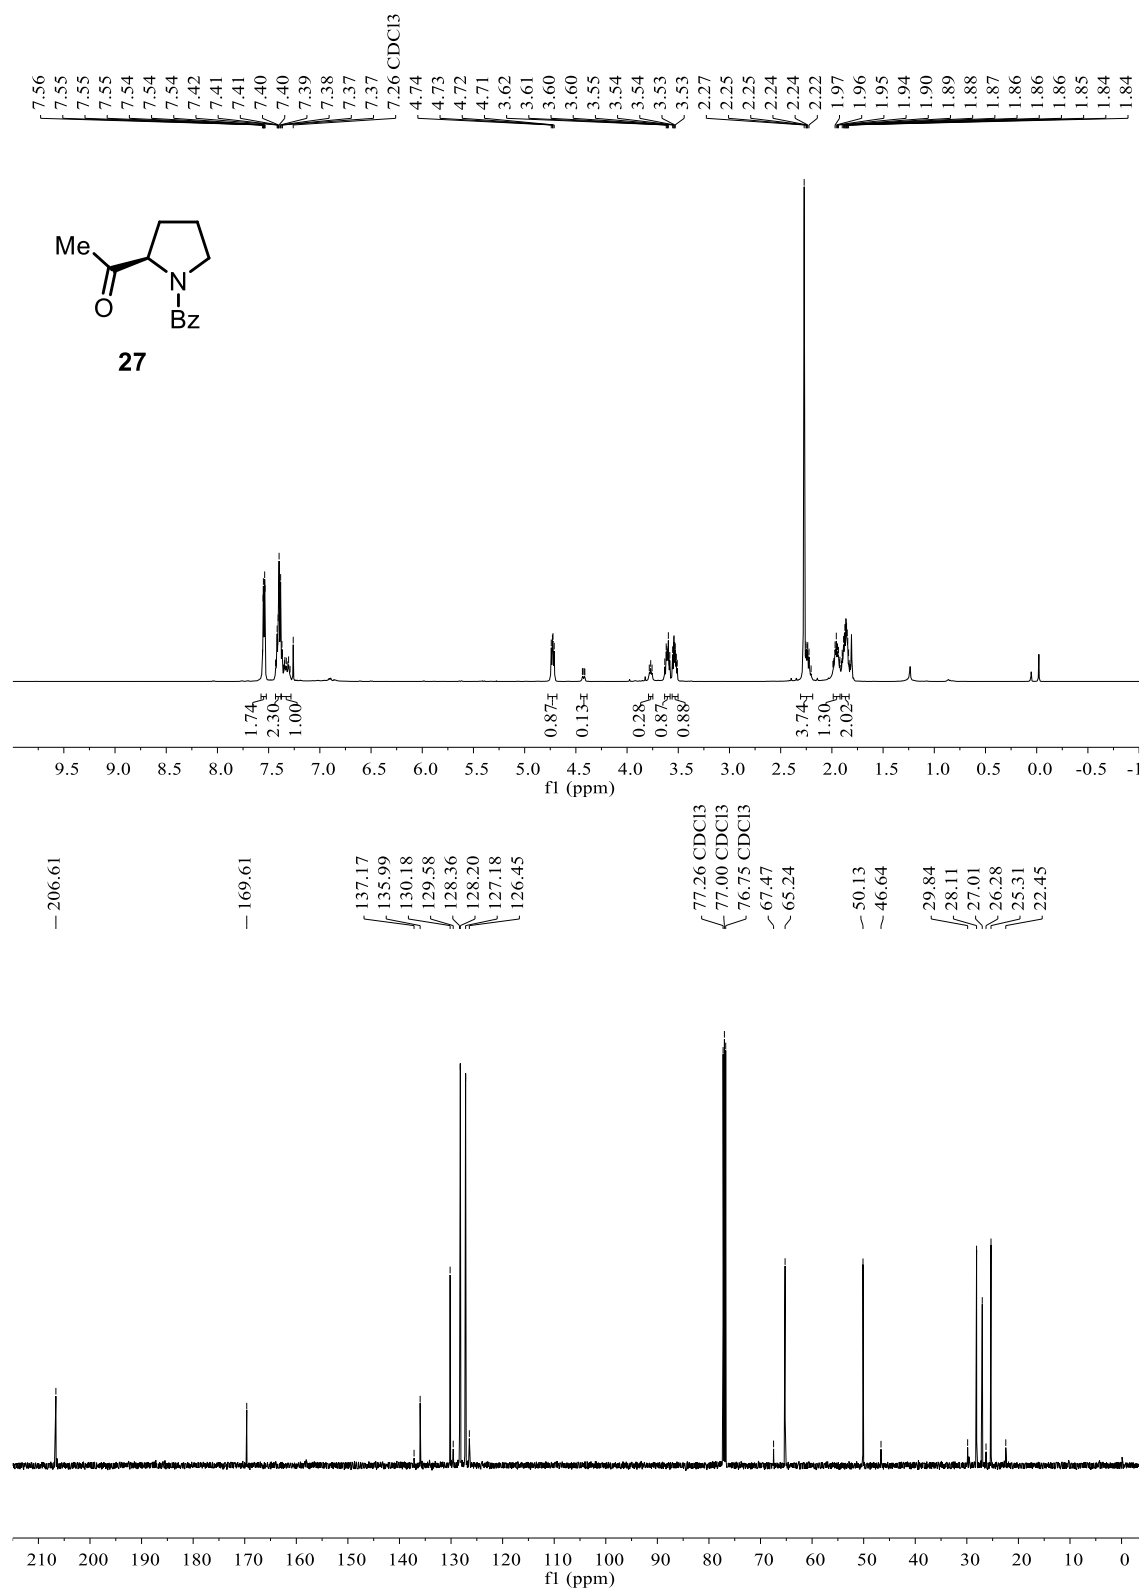

**Supplementary Fig. 33**  $^1\text{H}$  NMR (500 MHz,  $\text{CDCl}_3$ ) and  $^{13}\text{C}$  NMR (126 MHz,  $\text{CDCl}_3$ ) spectrum of **27**.

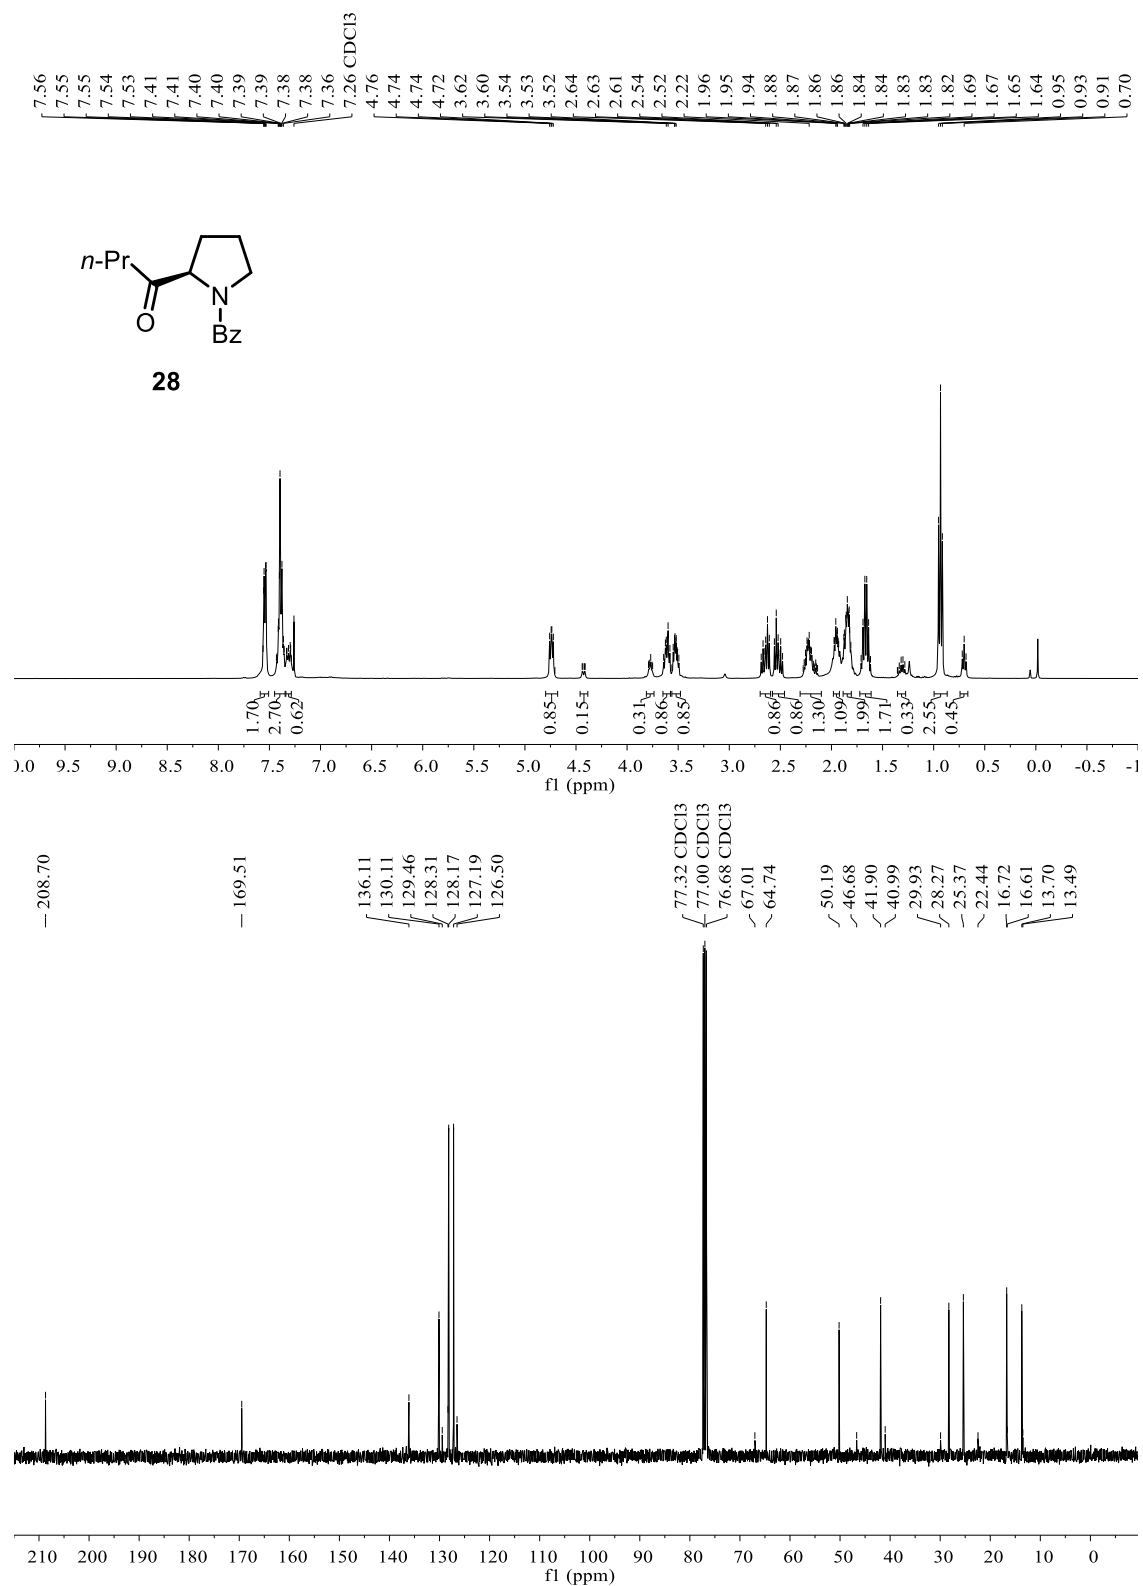

**Supplementary Fig. 34** <sup>1</sup>H NMR (400 MHz, CDCl<sub>3</sub>) and <sup>13</sup>C NMR (101 MHz, CDCl<sub>3</sub>) spectrum of **28**.

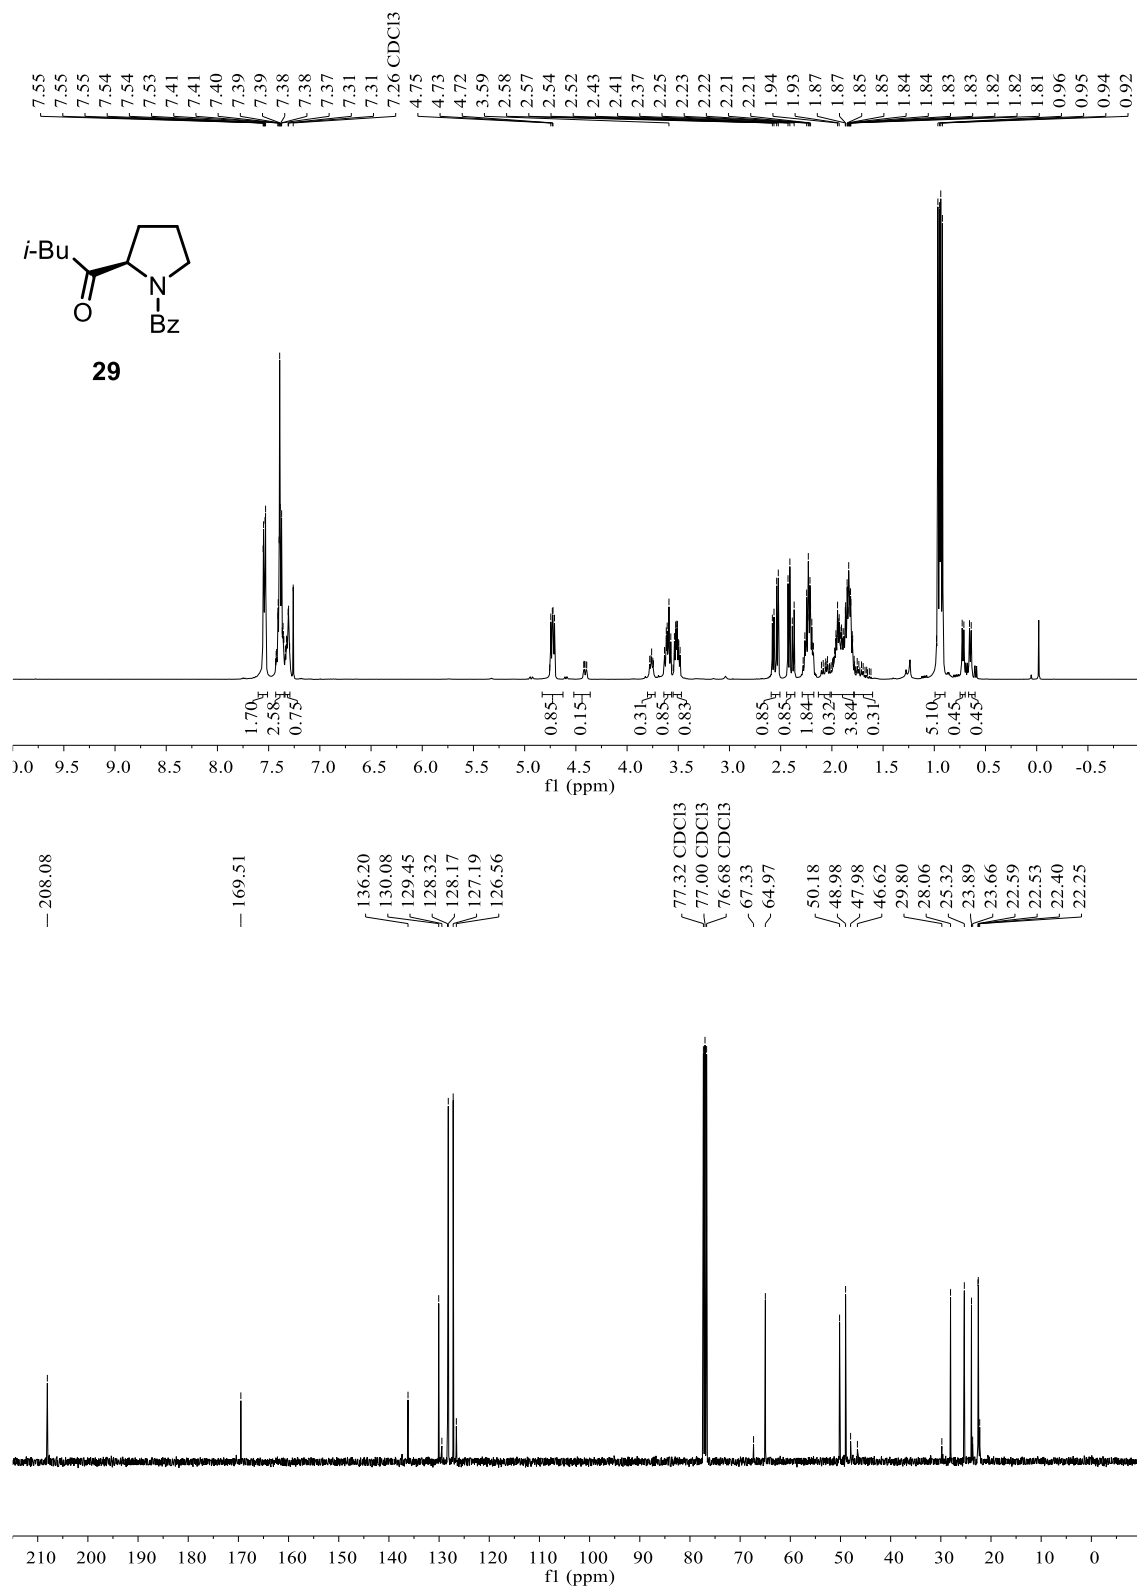

**Supplementary Fig. 35**  $^1\text{H}$  NMR (400 MHz,  $\text{CDCl}_3$ ) and  $^{13}\text{C}$  NMR (101 MHz,  $\text{CDCl}_3$ ) spectrum of **29**.

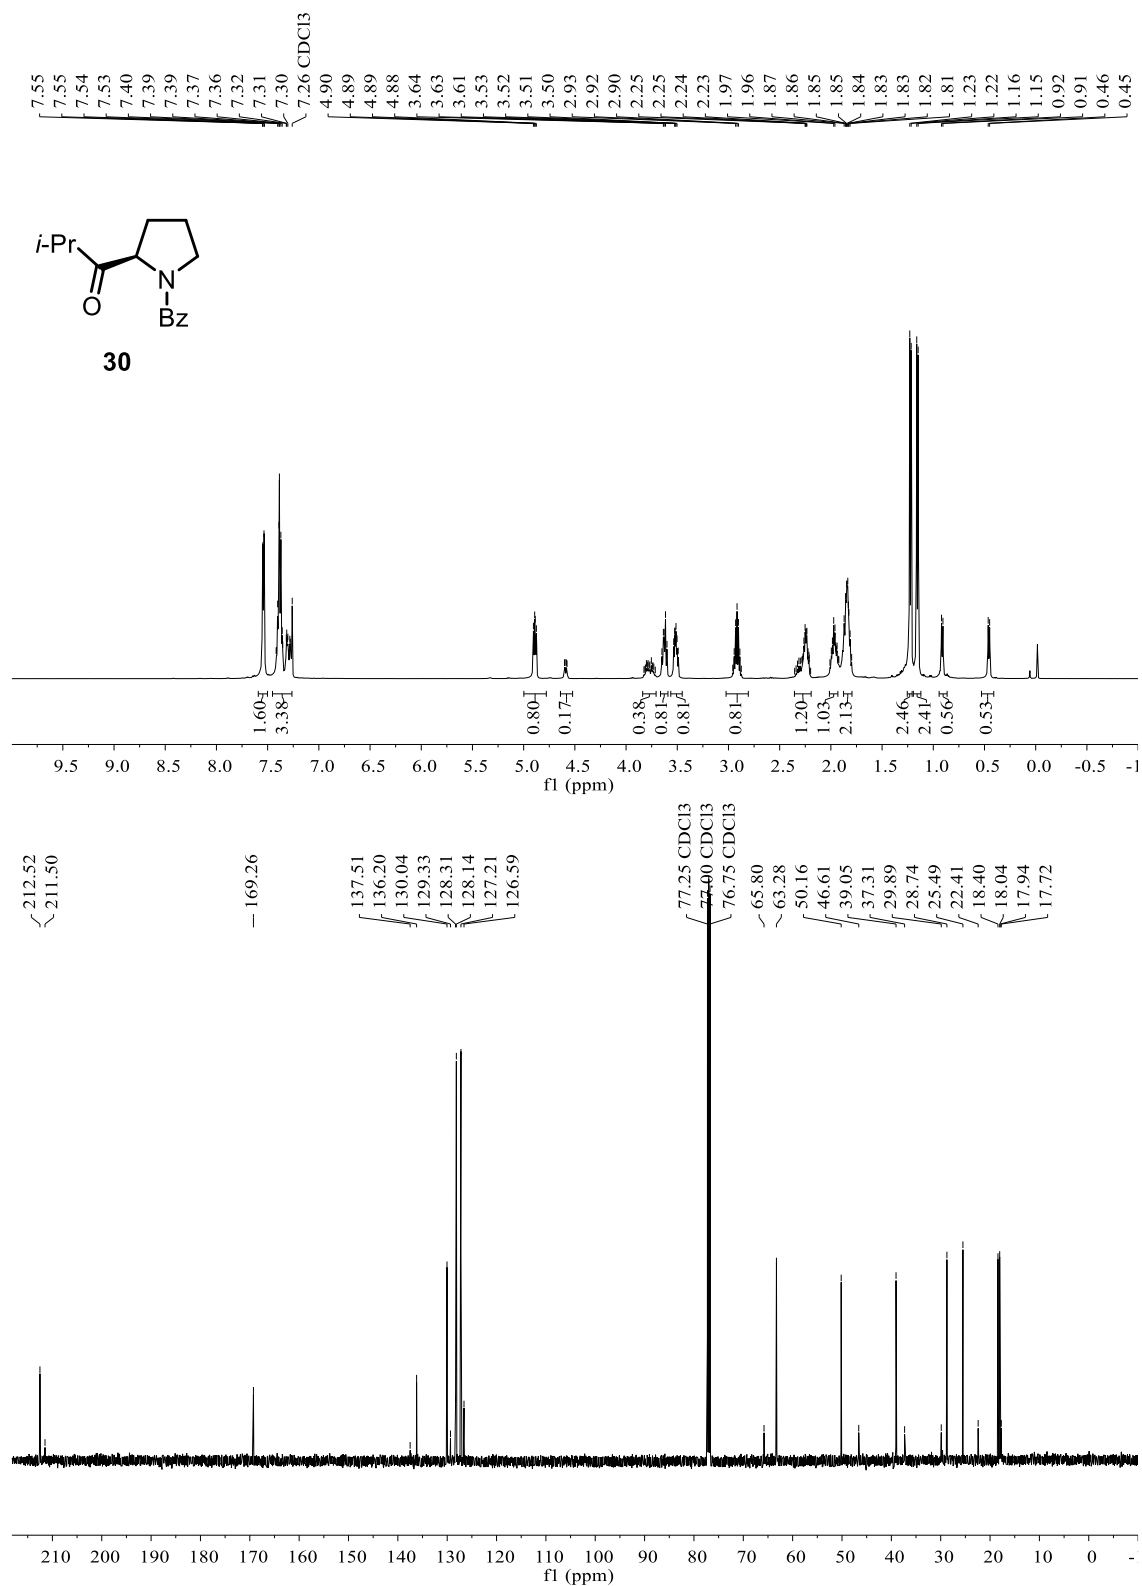

**Supplementary Fig. 36** <sup>1</sup>H NMR (500 MHz, CDCl<sub>3</sub>) and <sup>13</sup>C NMR (126 MHz, CDCl<sub>3</sub>) spectrum of **30**.

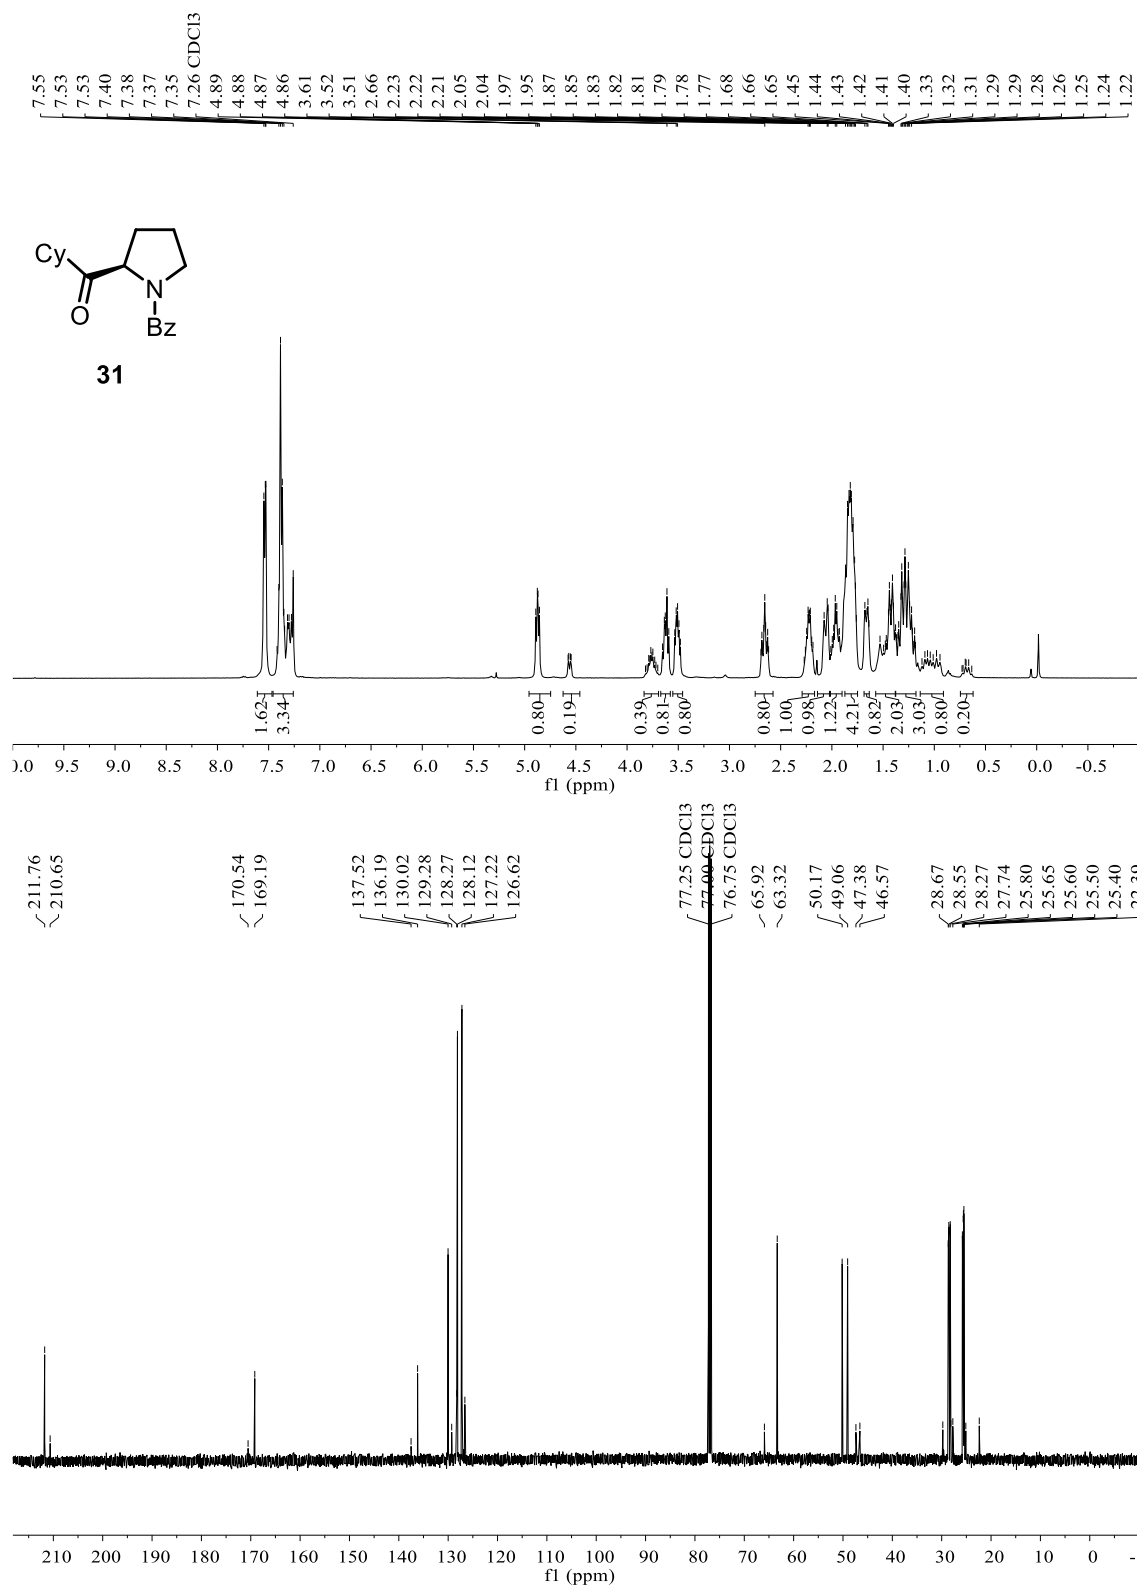

**Supplementary Fig. 37**  $^1\text{H}$  NMR (400 MHz,  $\text{CDCl}_3$ ) and  $^{13}\text{C}$  NMR (126 MHz,  $\text{CDCl}_3$ ) spectrum of **31**.

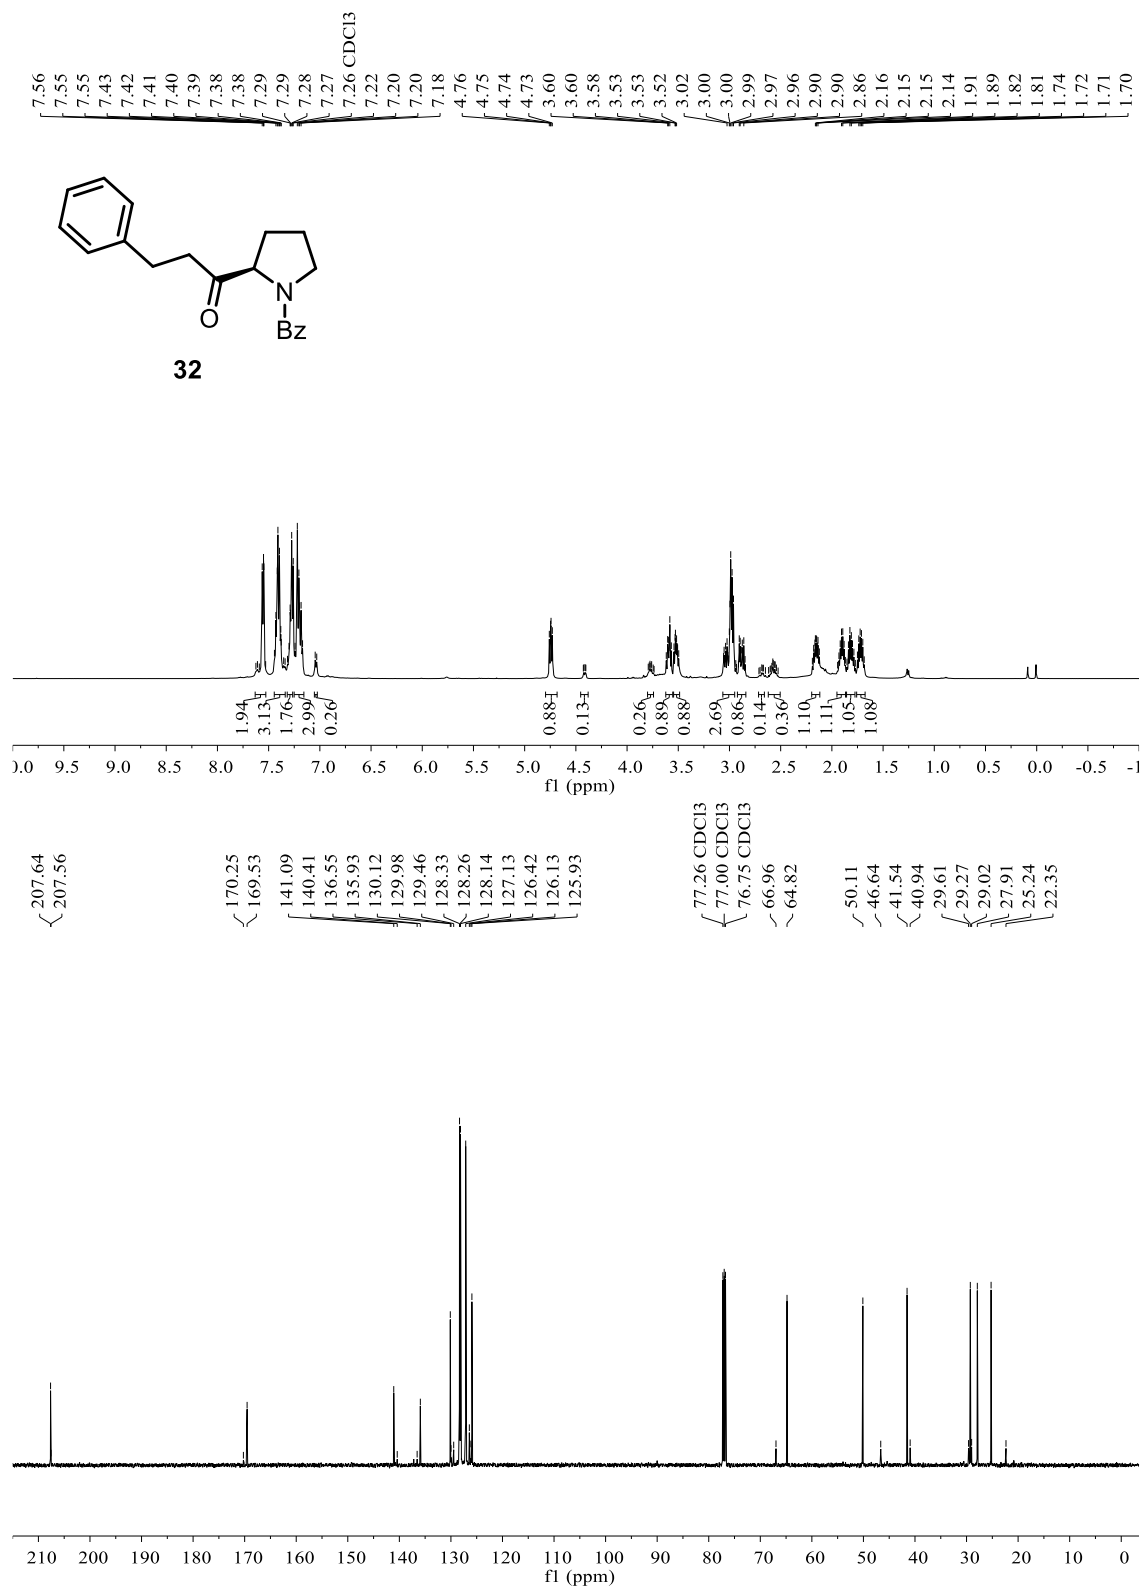

**Supplementary Fig. 38** <sup>1</sup>H NMR (500 MHz, CDCl<sub>3</sub>) and <sup>13</sup>C NMR (126 MHz, CDCl<sub>3</sub>) spectrum of **32**.

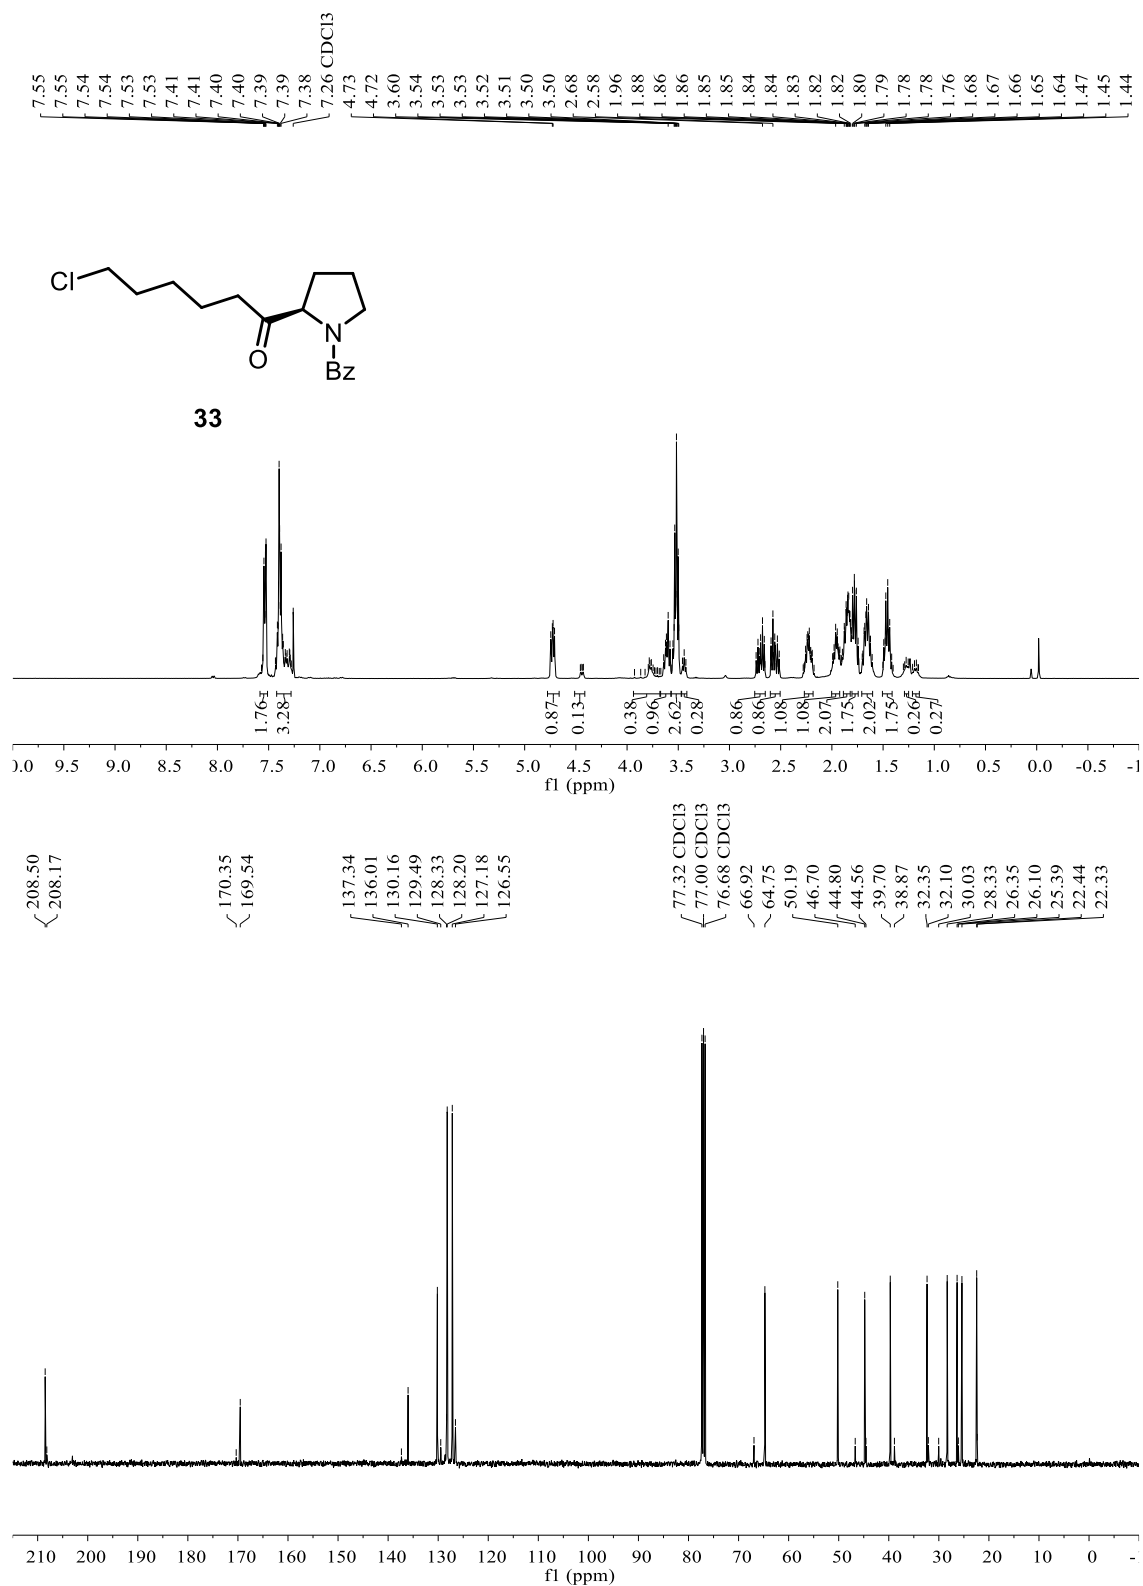

**Supplementary Fig. 39** <sup>1</sup>H NMR (400 MHz, CDCl<sub>3</sub>) and <sup>13</sup>C NMR (101 MHz, CDCl<sub>3</sub>) spectrum of **33**.

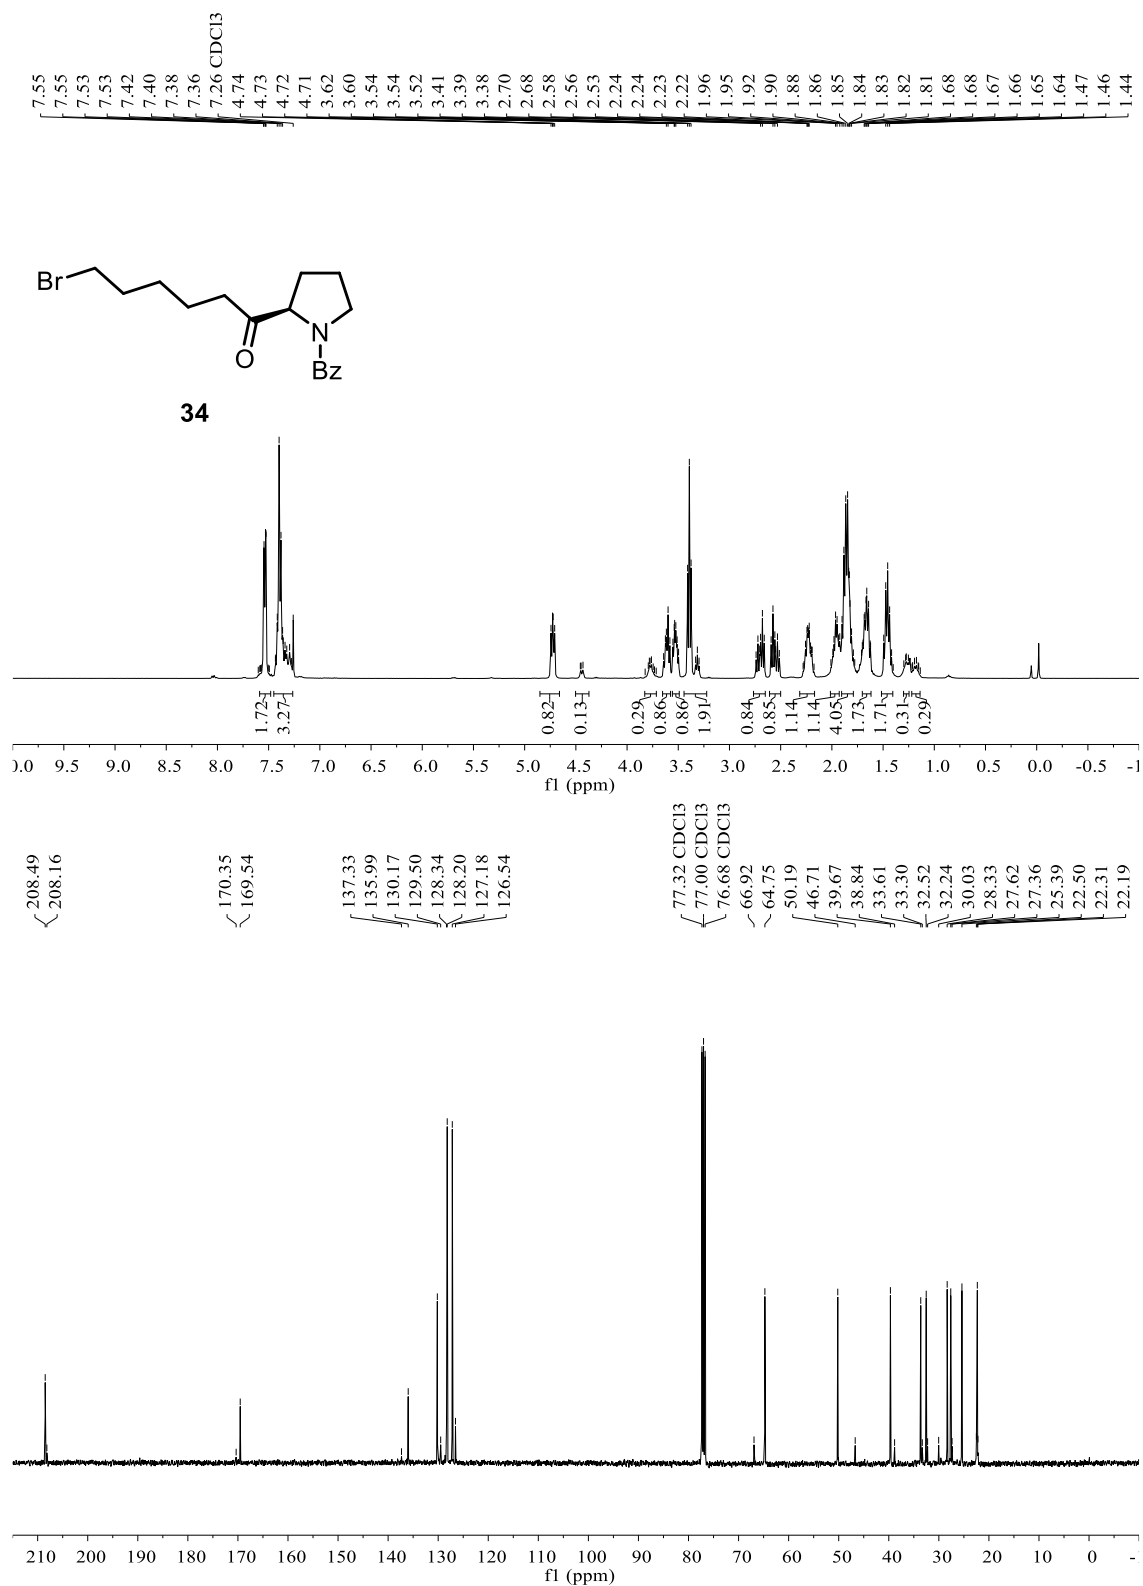

**Supplementary Fig. 40** <sup>1</sup>H NMR (400 MHz, CDCl<sub>3</sub>) and <sup>13</sup>C NMR (101 MHz, CDCl<sub>3</sub>) spectrum of **34**.

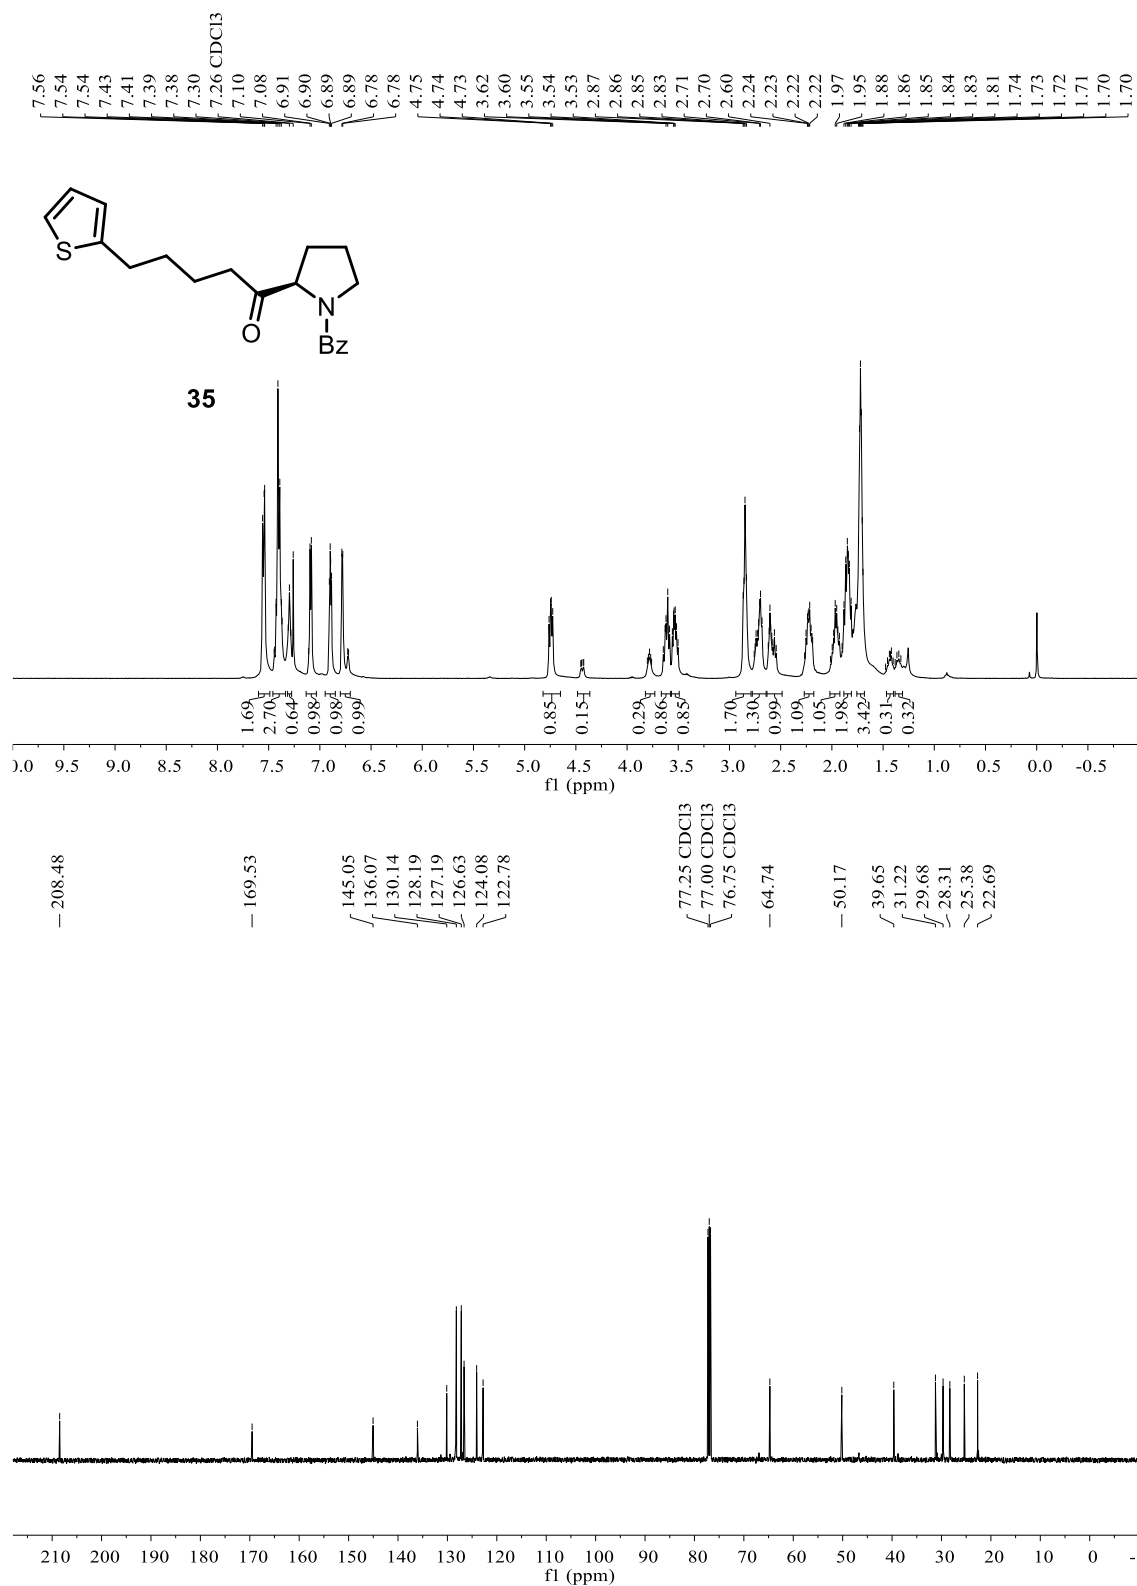

**Supplementary Fig. 41**  $^1\text{H}$  NMR (400 MHz,  $\text{CDCl}_3$ ) and  $^{13}\text{C}$  NMR (126 MHz,  $\text{CDCl}_3$ ) spectrum of **35**.

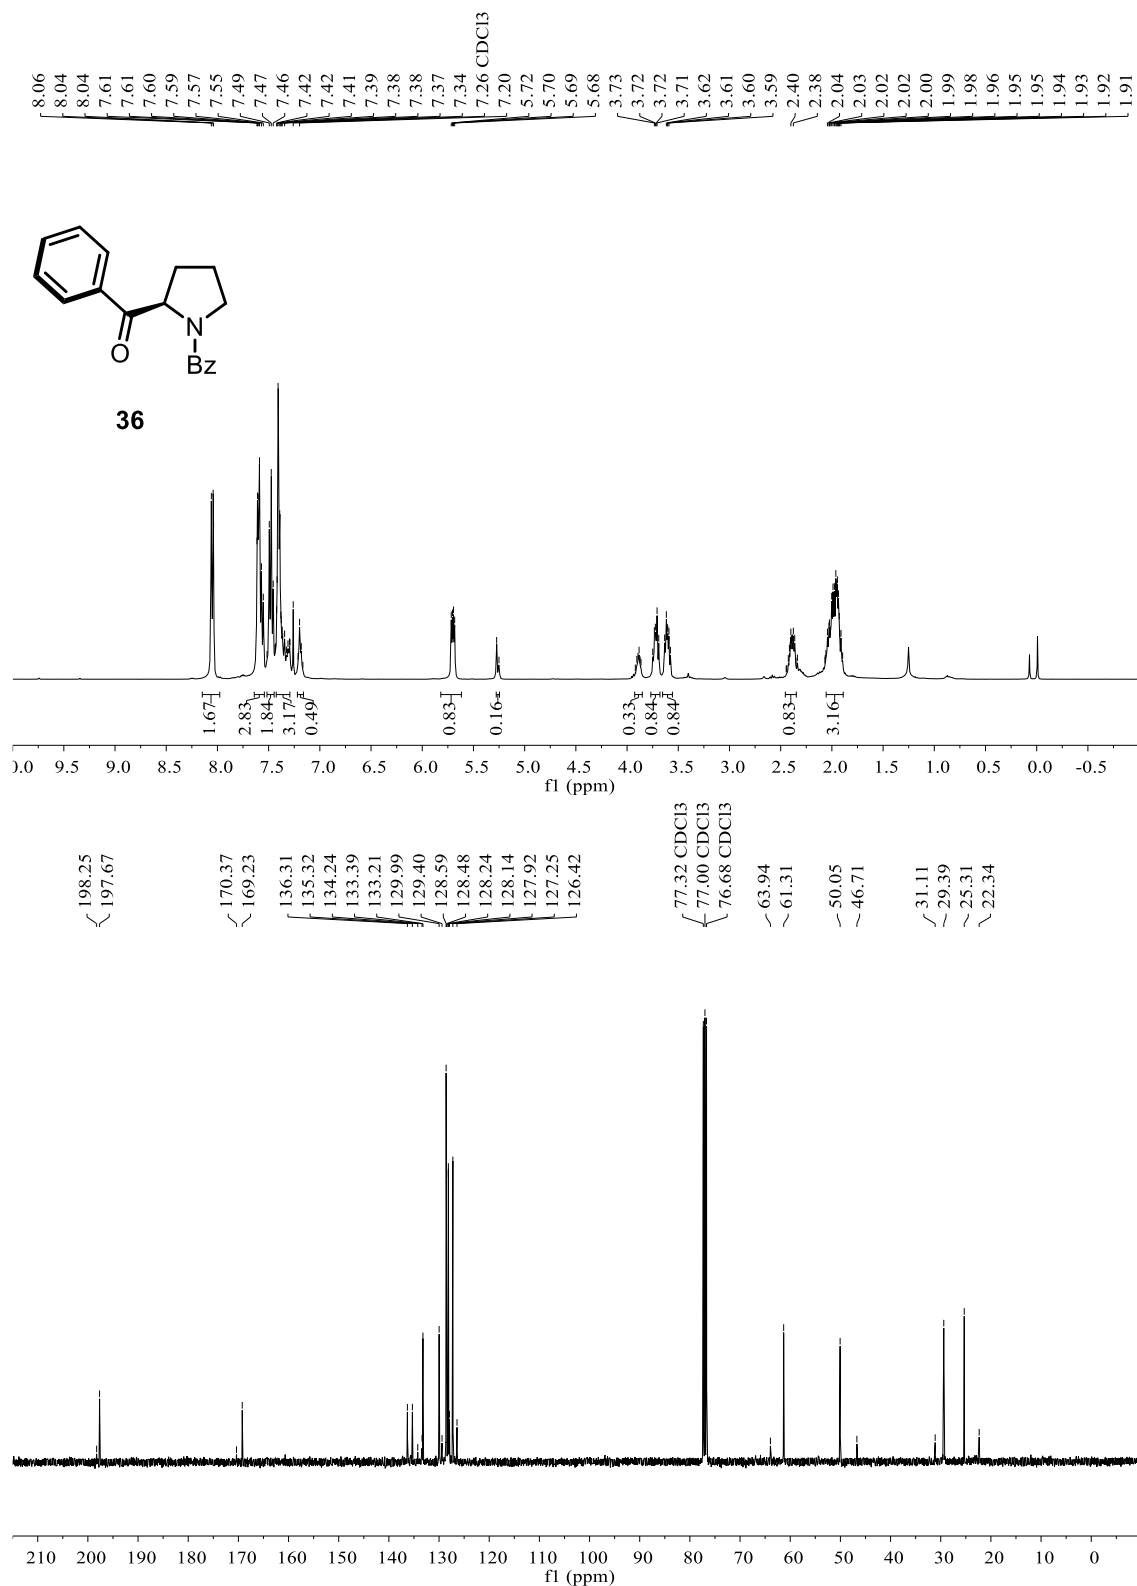

**Supplementary Fig. 42**  $^1\text{H}$  NMR (400 MHz,  $\text{CDCl}_3$ ) and  $^{13}\text{C}$  NMR (101 MHz,  $\text{CDCl}_3$ ) spectrum of **36**.

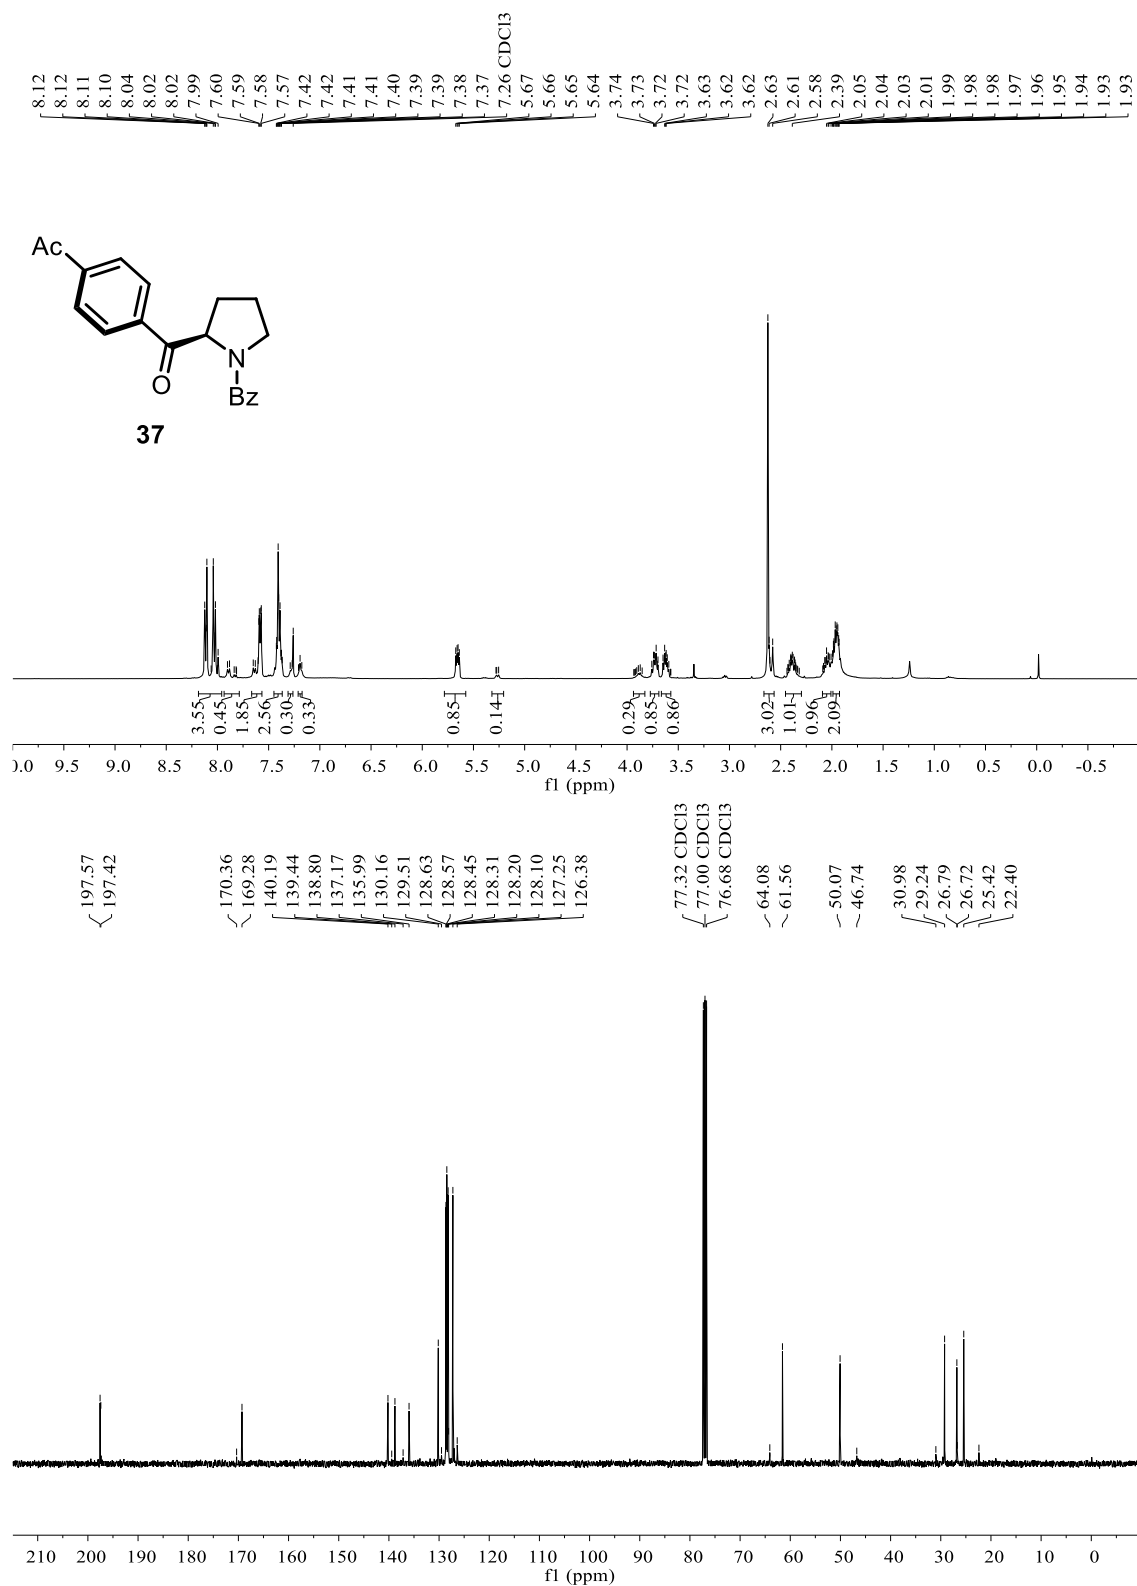

**Supplementary Fig. 43**  $^1\text{H}$  NMR (400 MHz,  $\text{CDCl}_3$ ) and  $^{13}\text{C}$  NMR (101 MHz,  $\text{CDCl}_3$ ) spectrum of **37**.

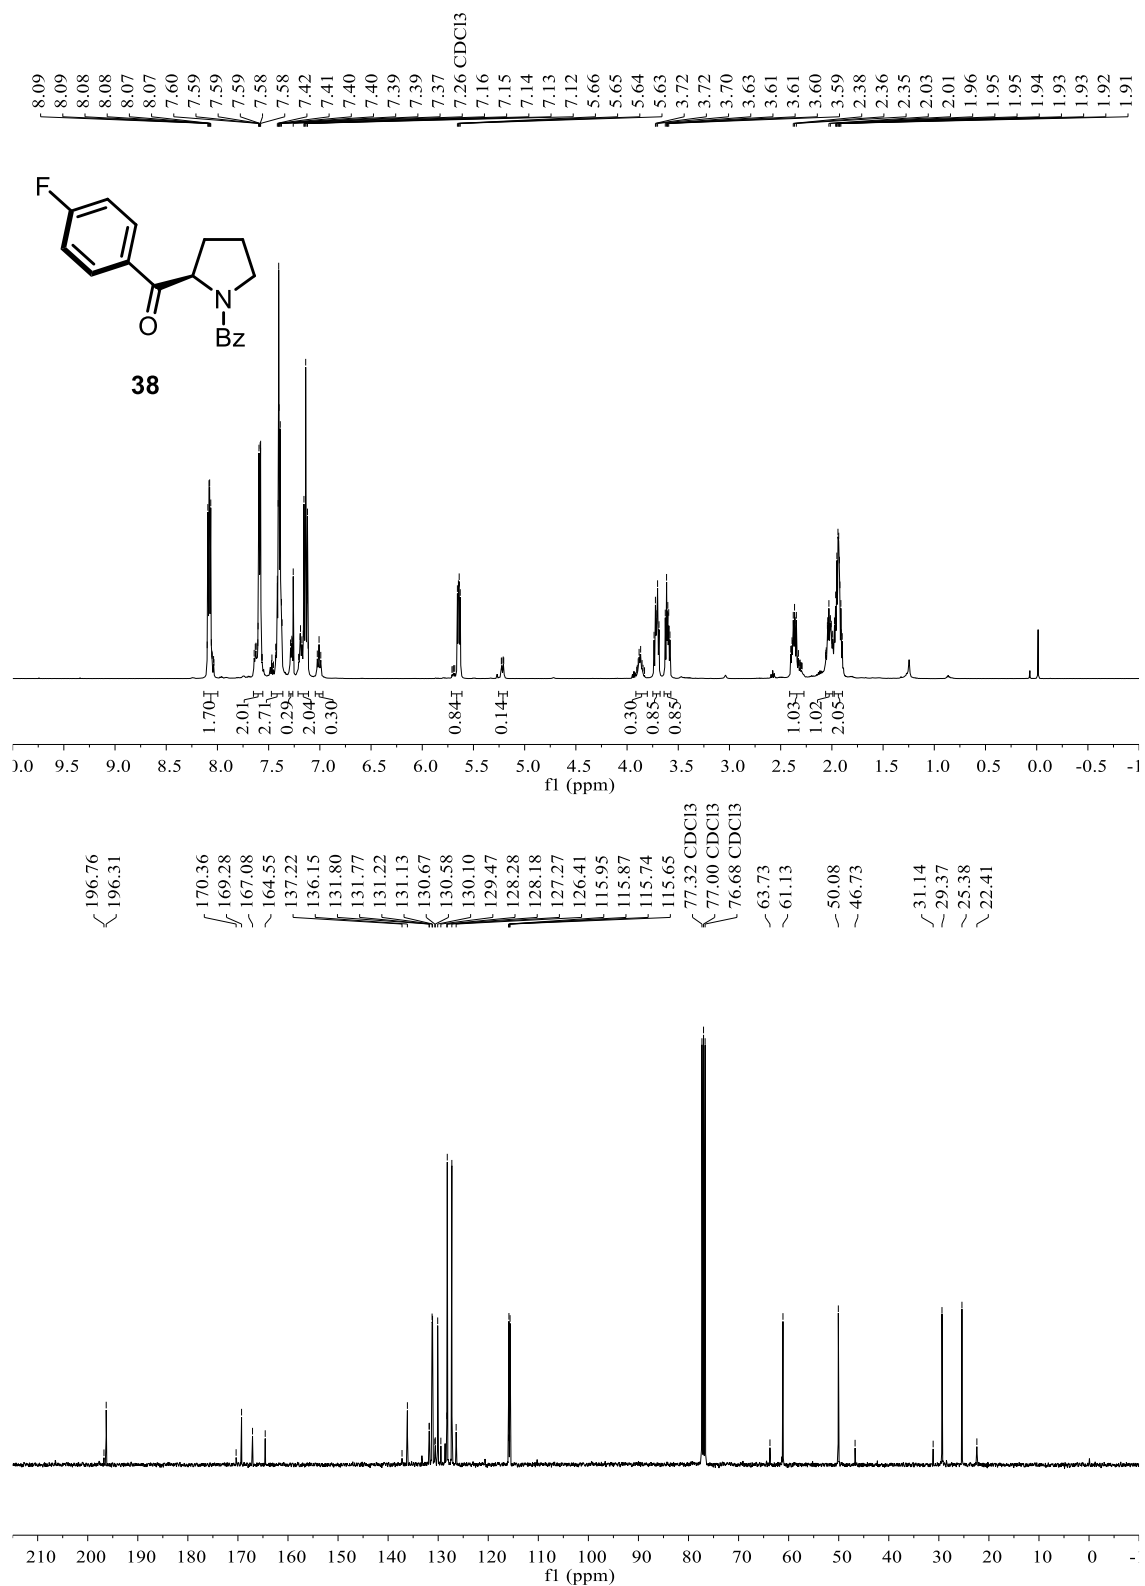

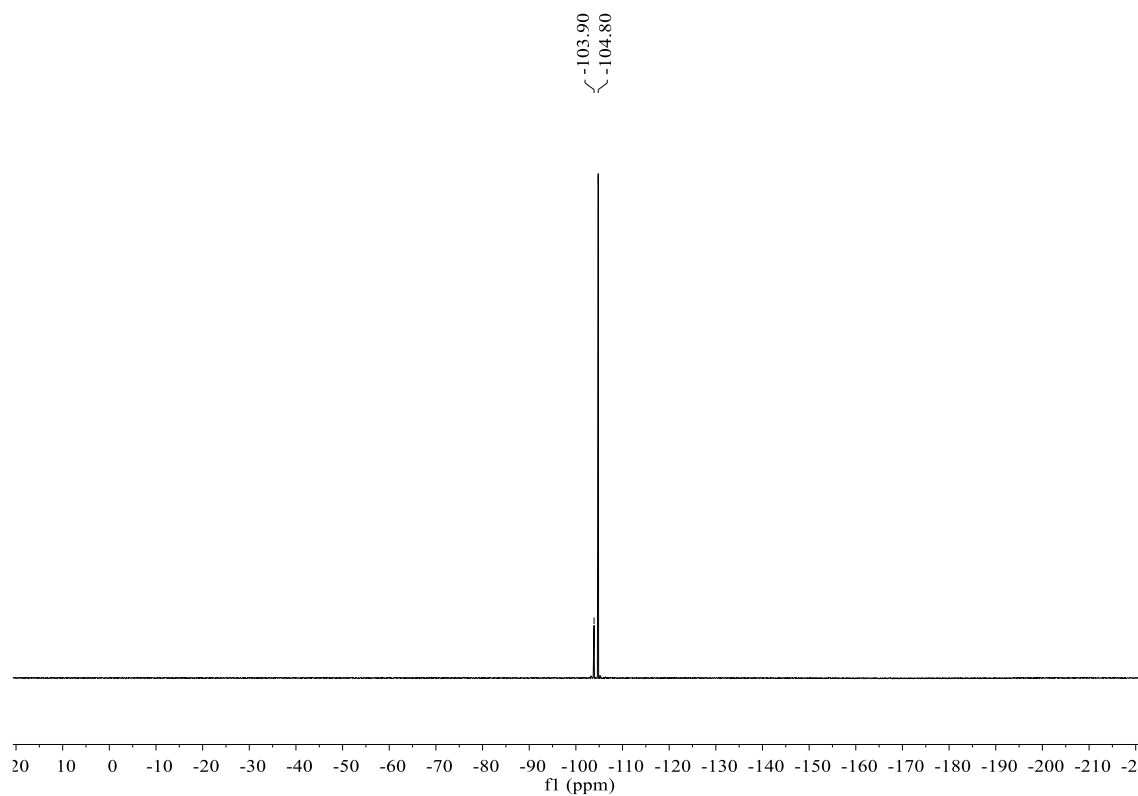

**Supplementary Fig. 44**  $^1\text{H}$  NMR (500 MHz,  $\text{CDCl}_3$ ),  $^{13}\text{C}$  NMR (101 MHz,  $\text{CDCl}_3$ ) and  $^{19}\text{F}$  NMR (471 MHz,  $\text{CDCl}_3$ ) spectrum of **38**.

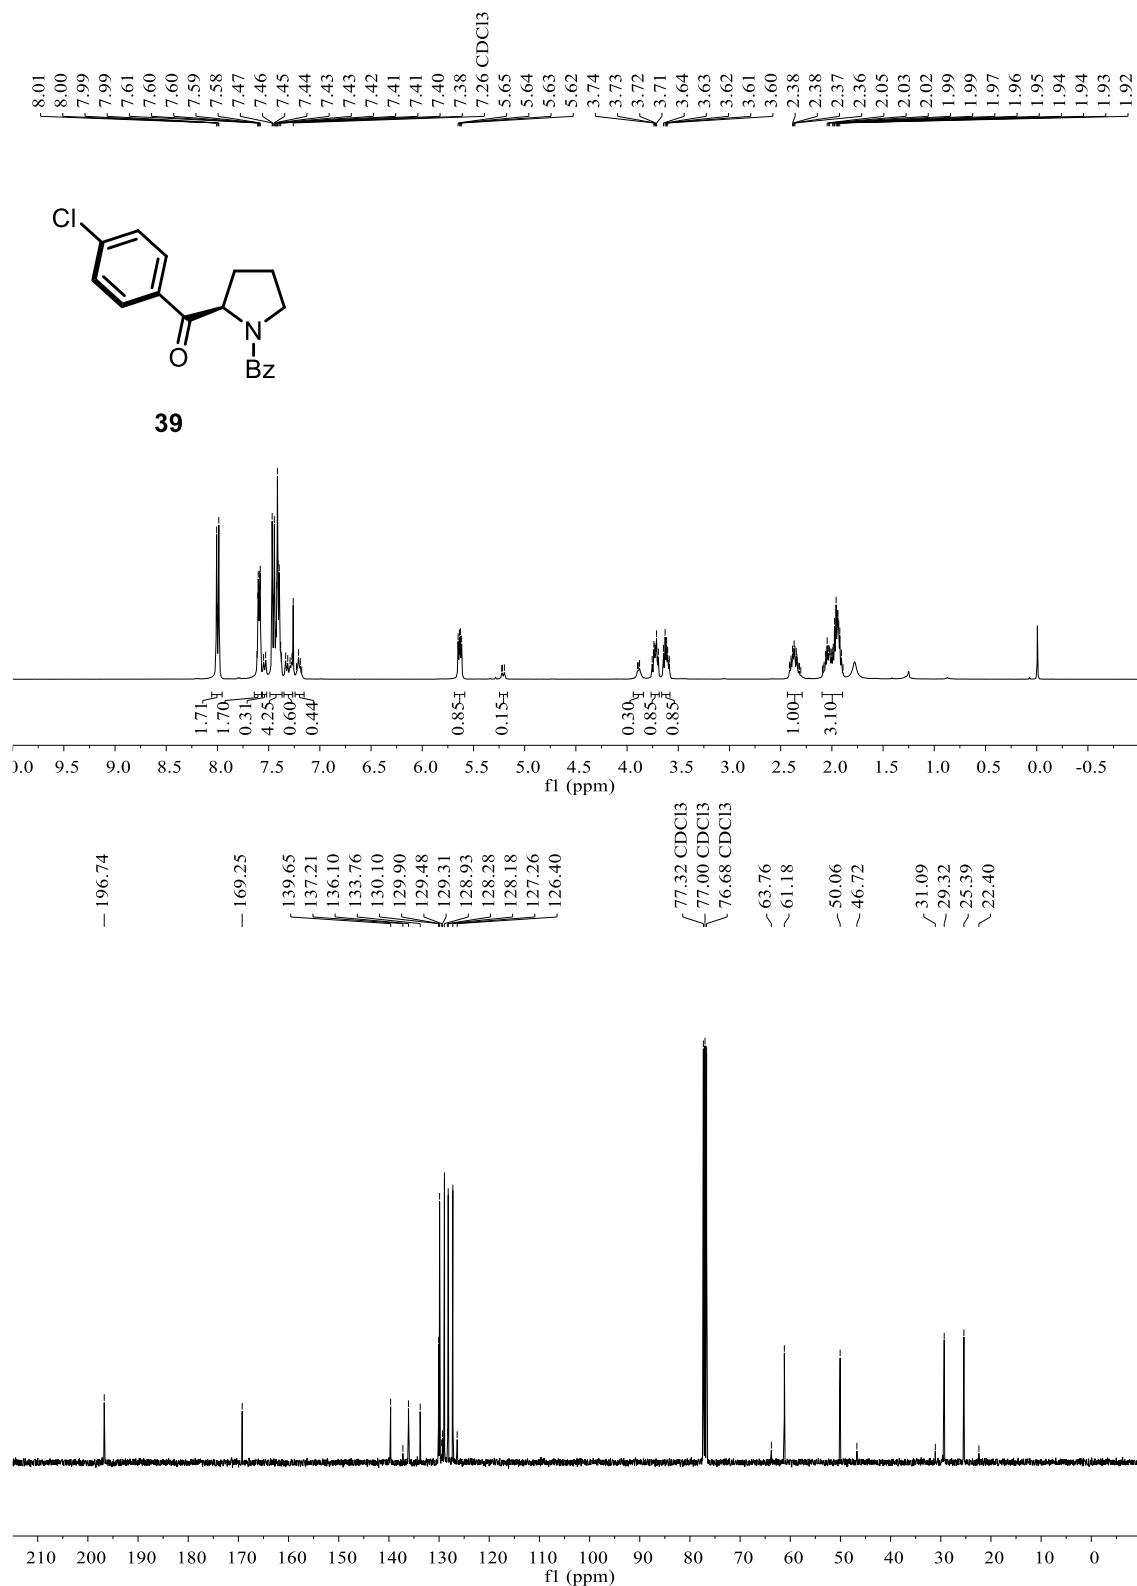

**Supplementary Fig. 45** <sup>1</sup>H NMR (400 MHz, CDCl<sub>3</sub>) and <sup>13</sup>C NMR (101 MHz, CDCl<sub>3</sub>) spectrum of 39.

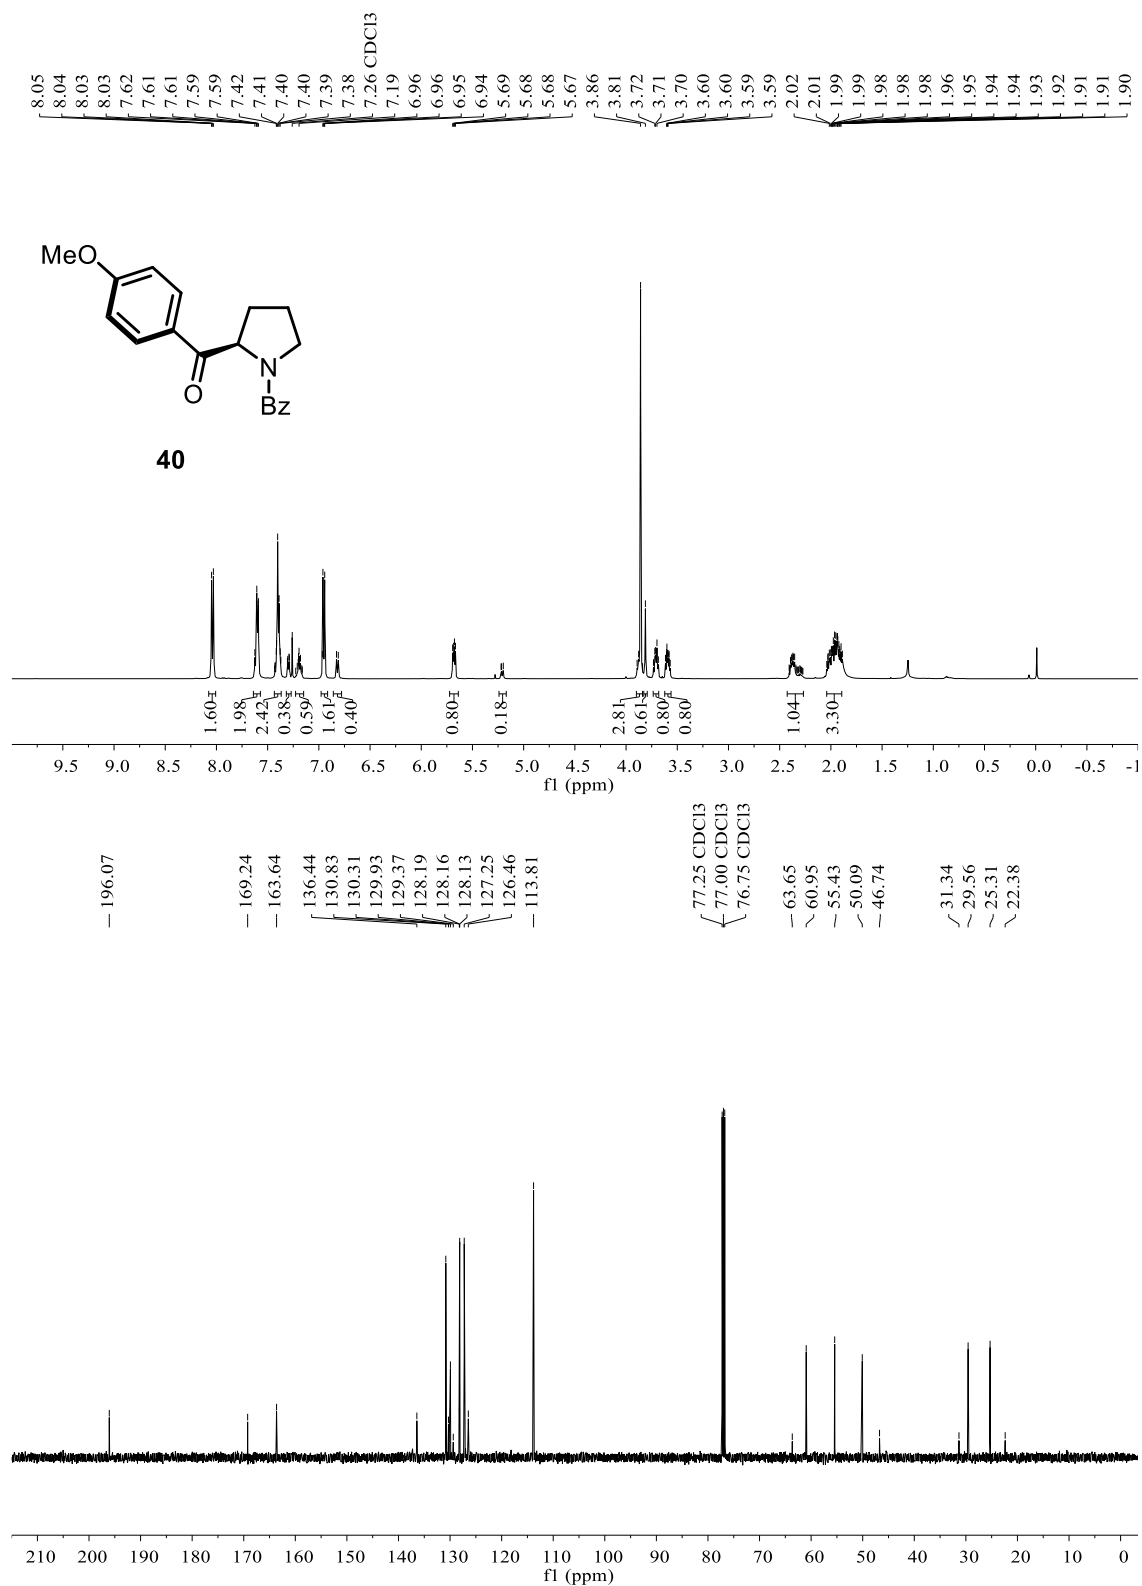

**Supplementary Fig. 46**  $^1\text{H}$  NMR (500 MHz,  $\text{CDCl}_3$ ) and  $^{13}\text{C}$  NMR (126 MHz,  $\text{CDCl}_3$ ) spectrum of **40**.

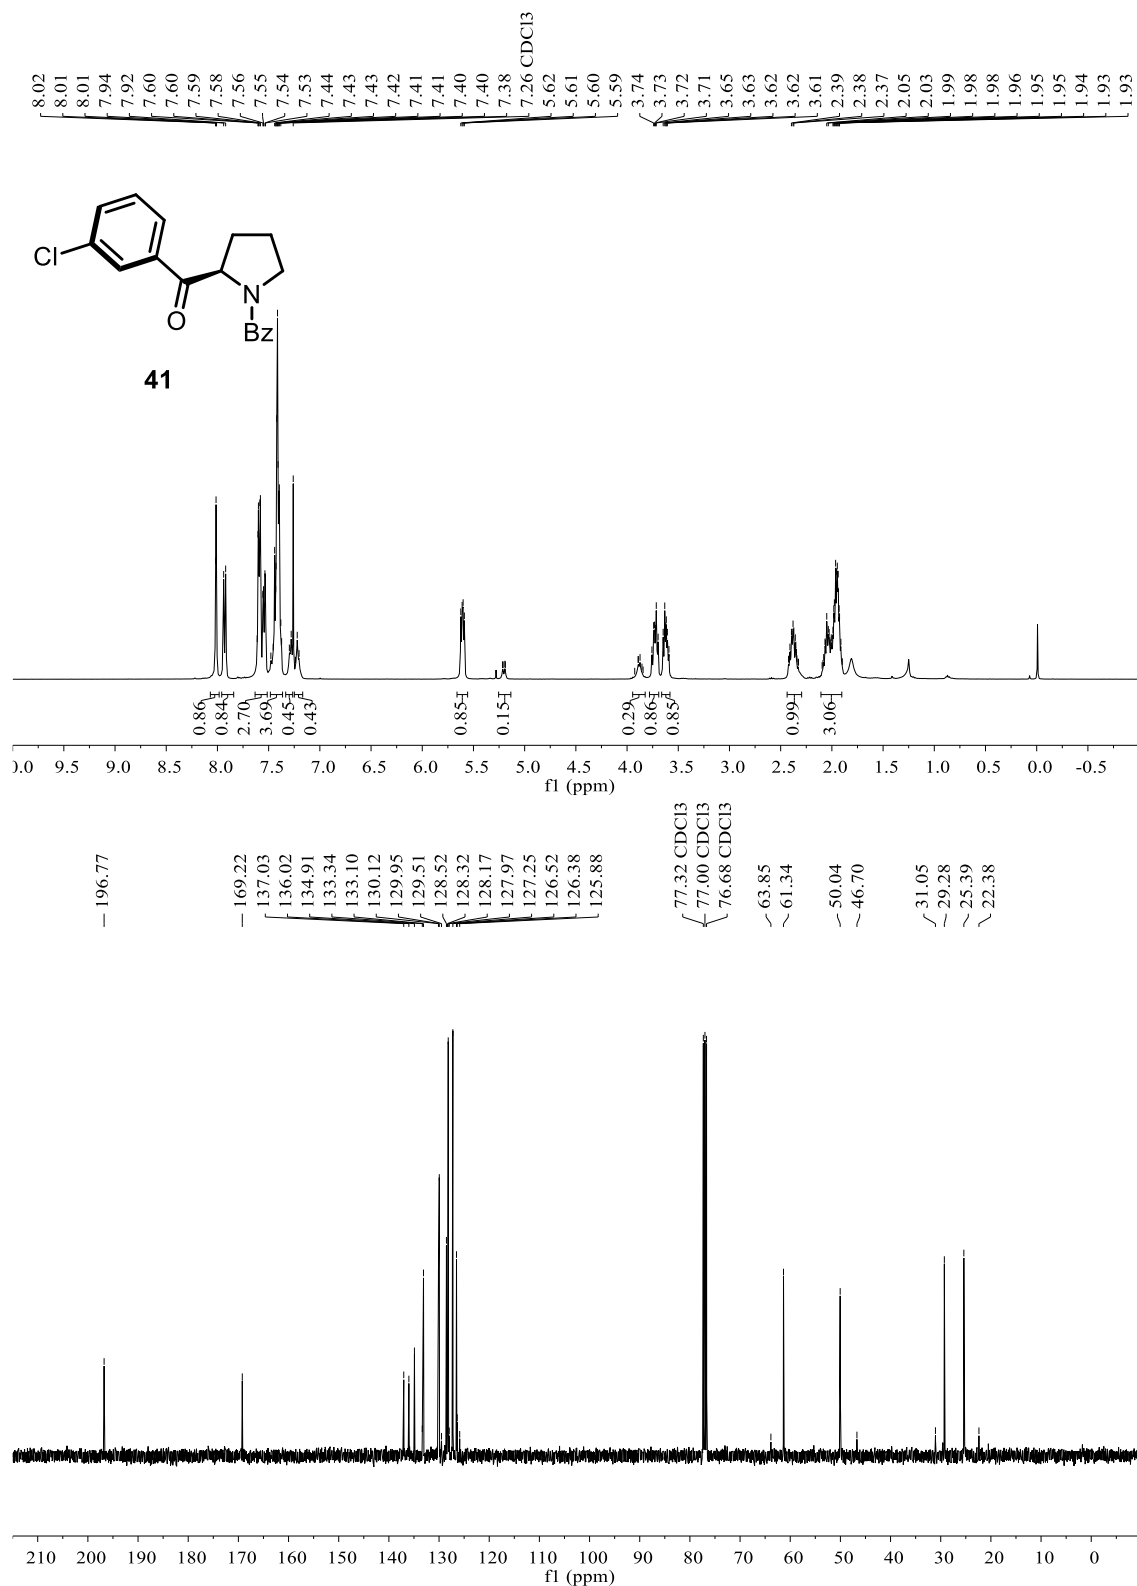

**Supplementary Fig. 47** <sup>1</sup>H NMR (400 MHz, CDCl<sub>3</sub>) and <sup>13</sup>C NMR (101 MHz, CDCl<sub>3</sub>) spectrum of **41**.

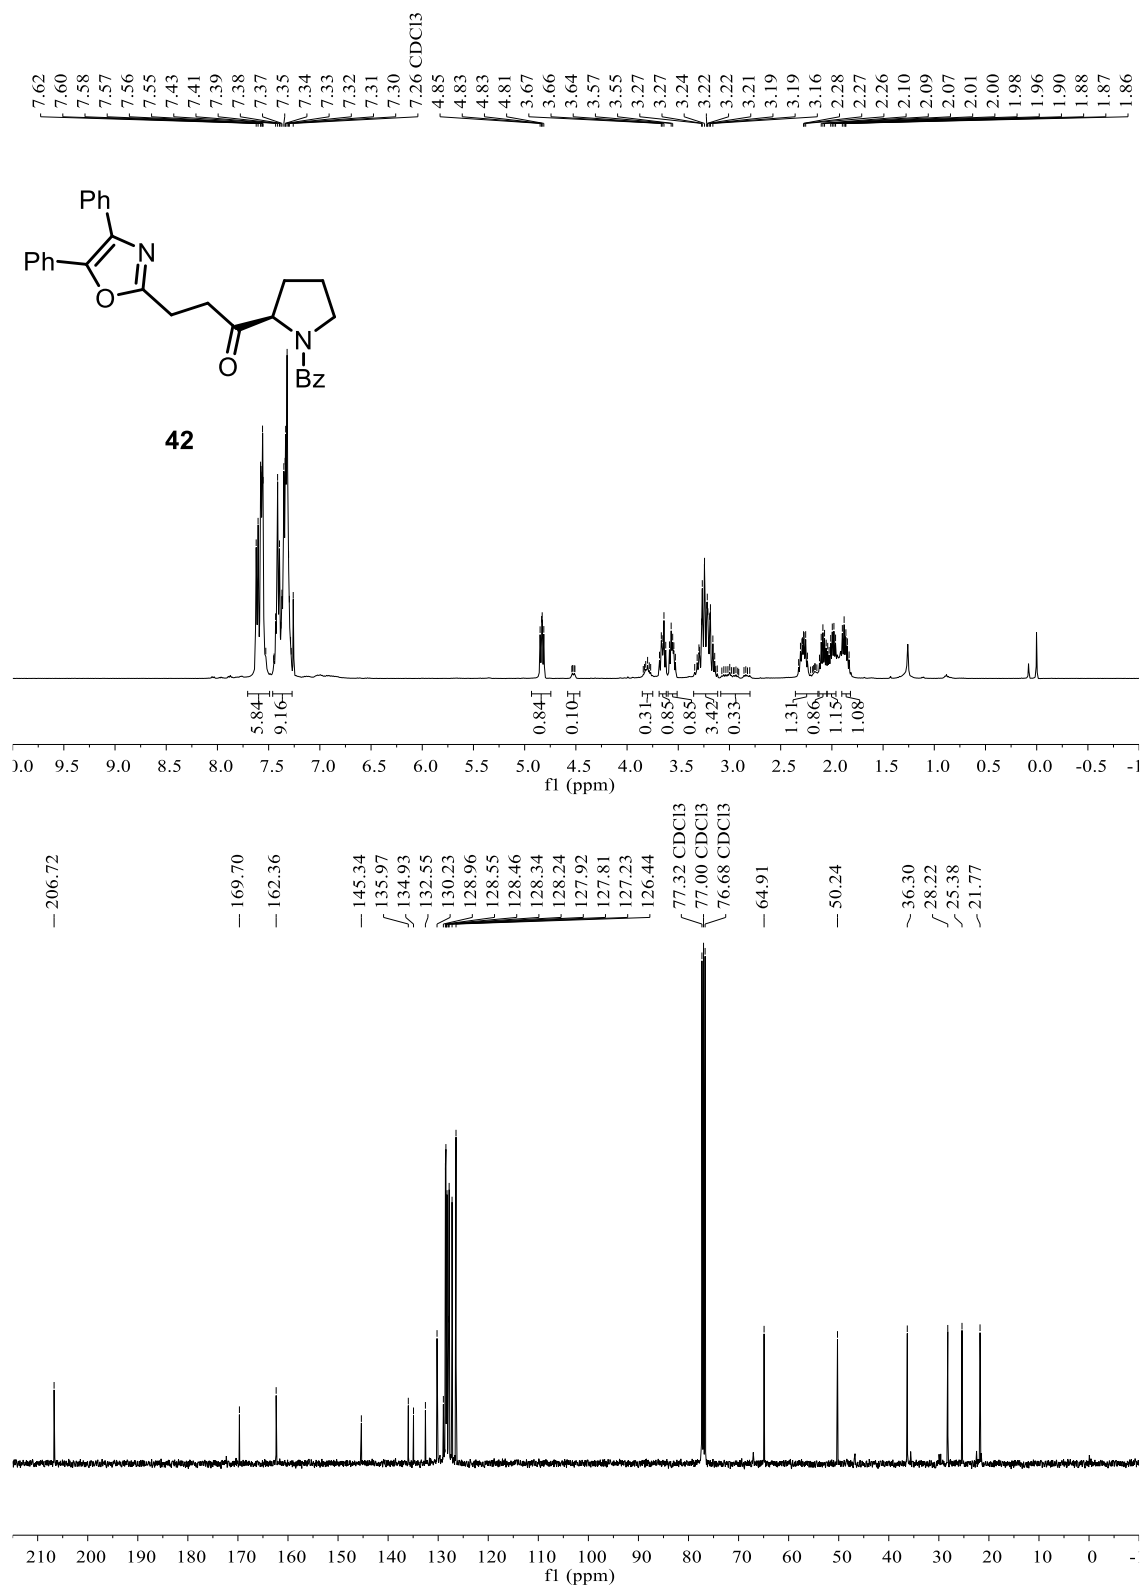

**Supplementary Fig. 48**  $^1\text{H}$  NMR (400 MHz,  $\text{CDCl}_3$ ) and  $^{13}\text{C}$  NMR (101 MHz,  $\text{CDCl}_3$ ) spectrum of **42**.

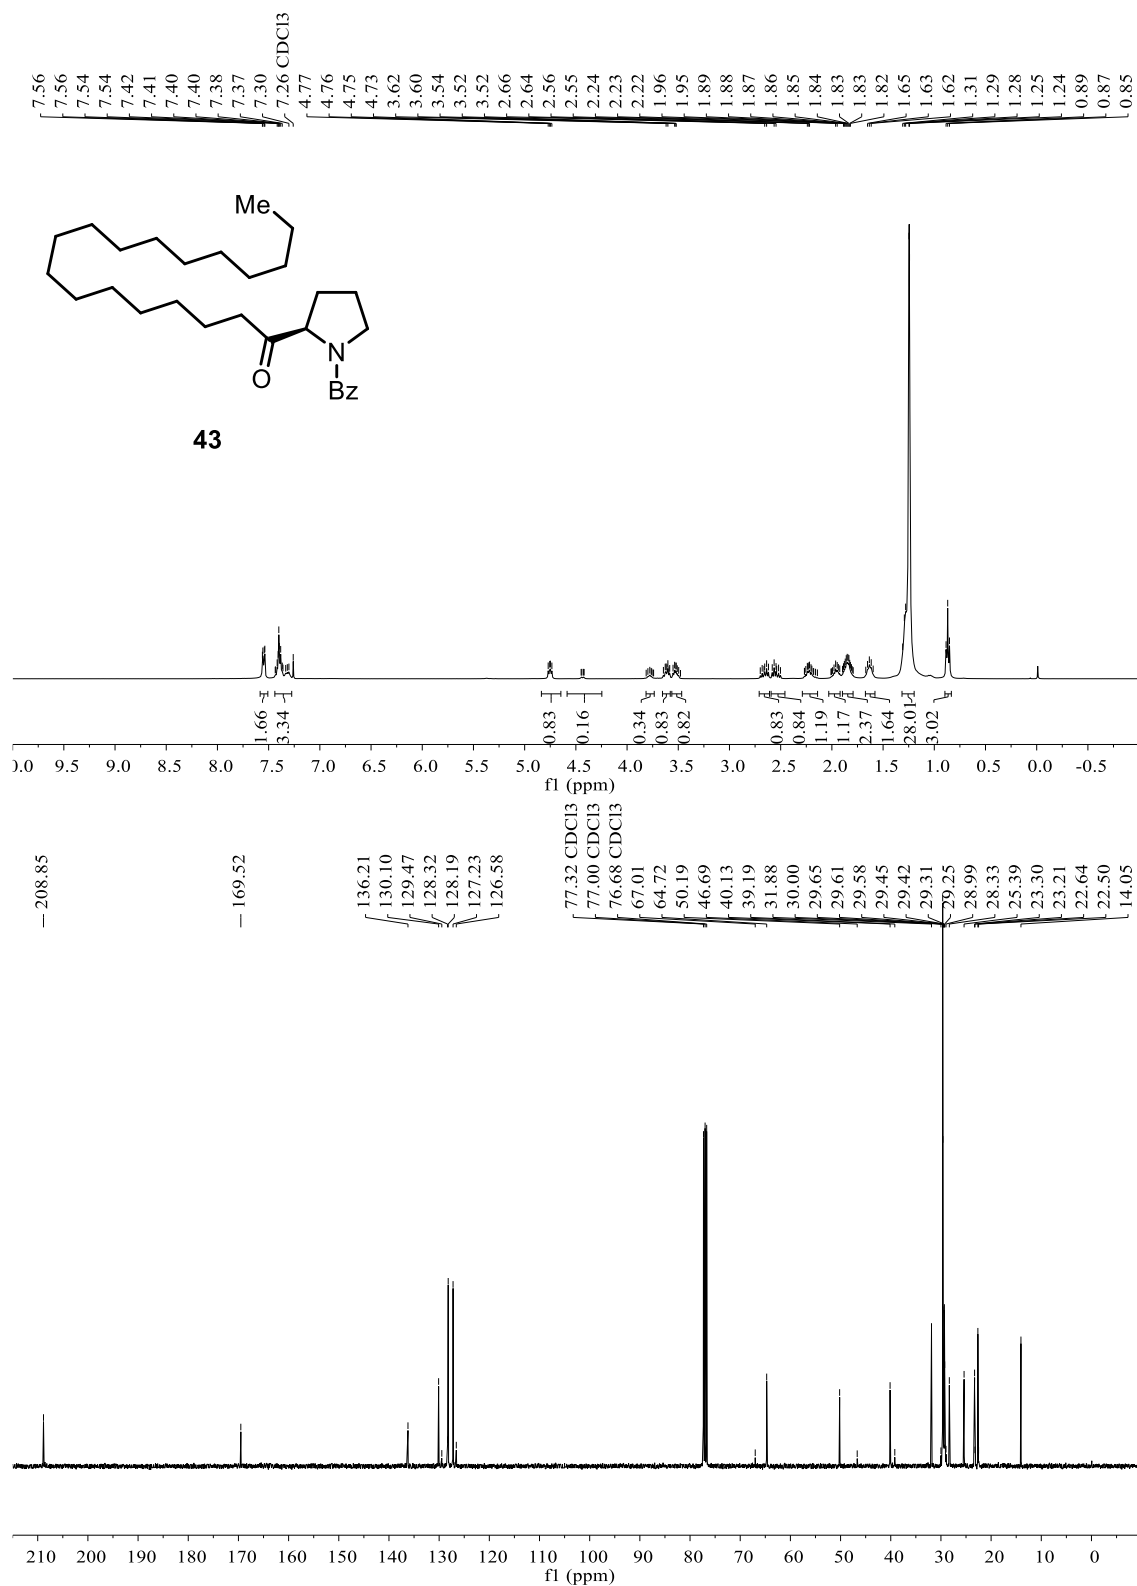

**Supplementary Fig. 49** <sup>1</sup>H NMR (400 MHz, CDCl<sub>3</sub>) and <sup>13</sup>C NMR (101 MHz, CDCl<sub>3</sub>) spectrum of **43**.

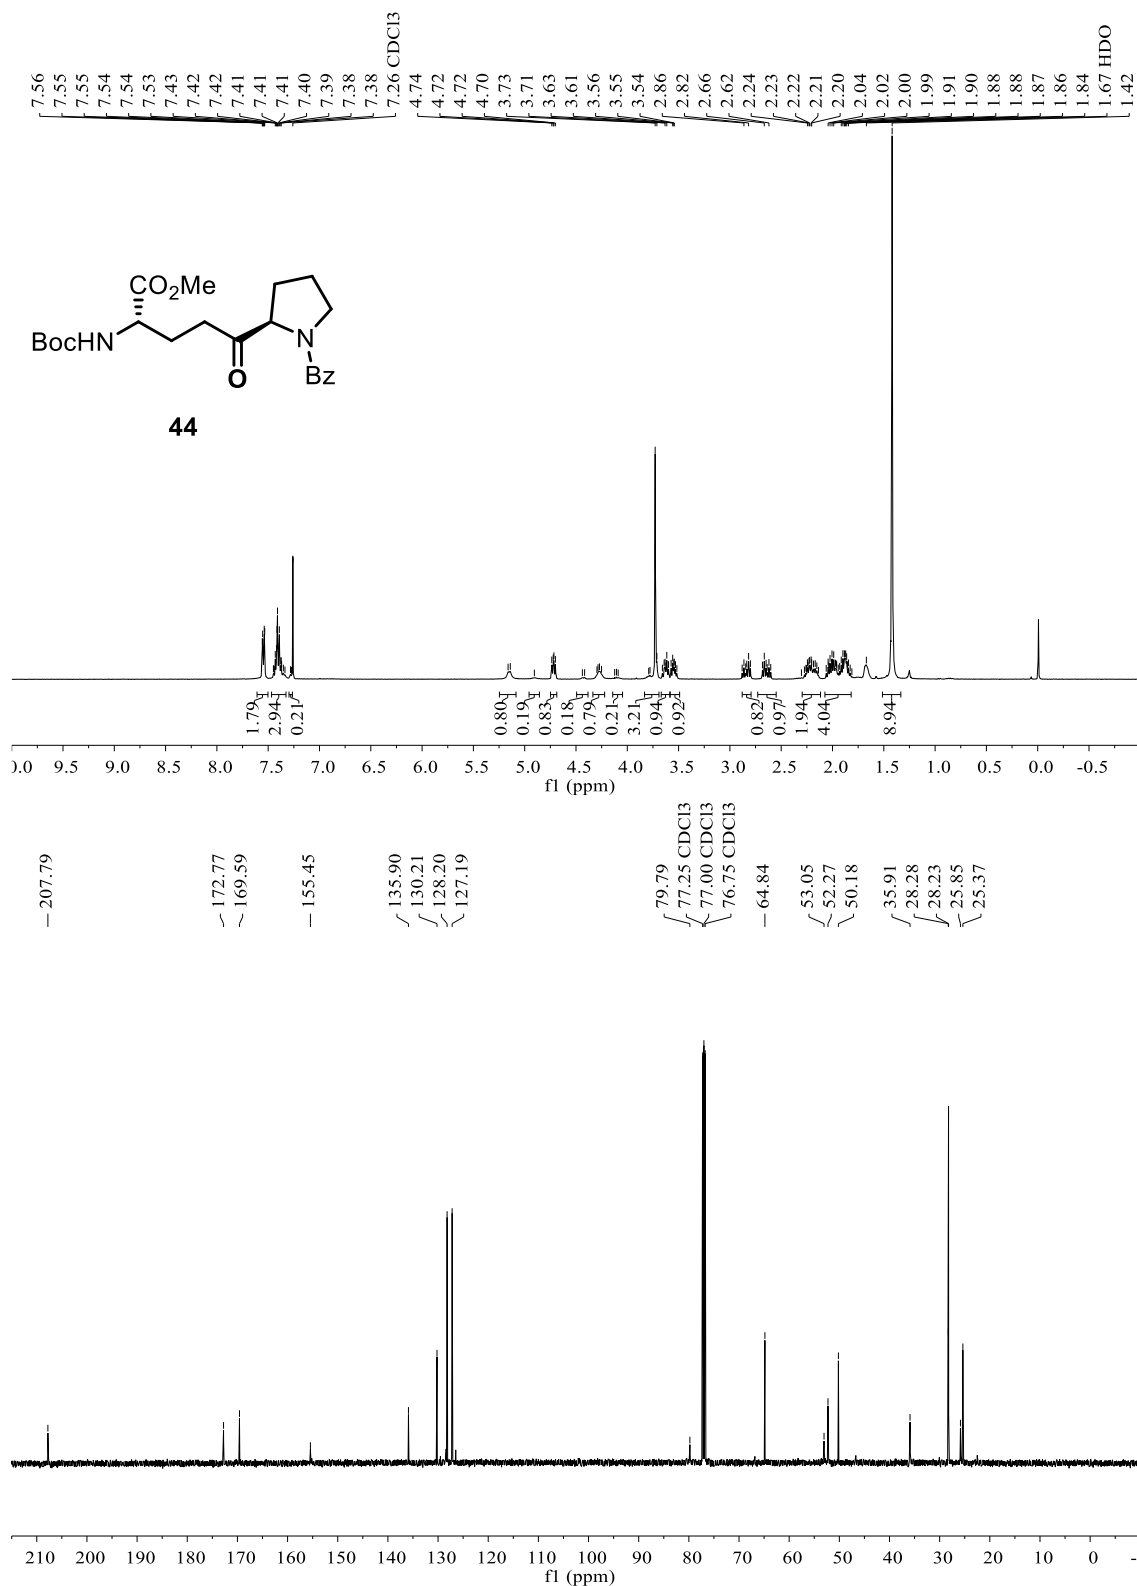

**Supplementary Fig. 50** <sup>1</sup>H NMR (400 MHz, CDCl<sub>3</sub>) and <sup>13</sup>C NMR (126 MHz, CDCl<sub>3</sub>) spectrum of **44**.

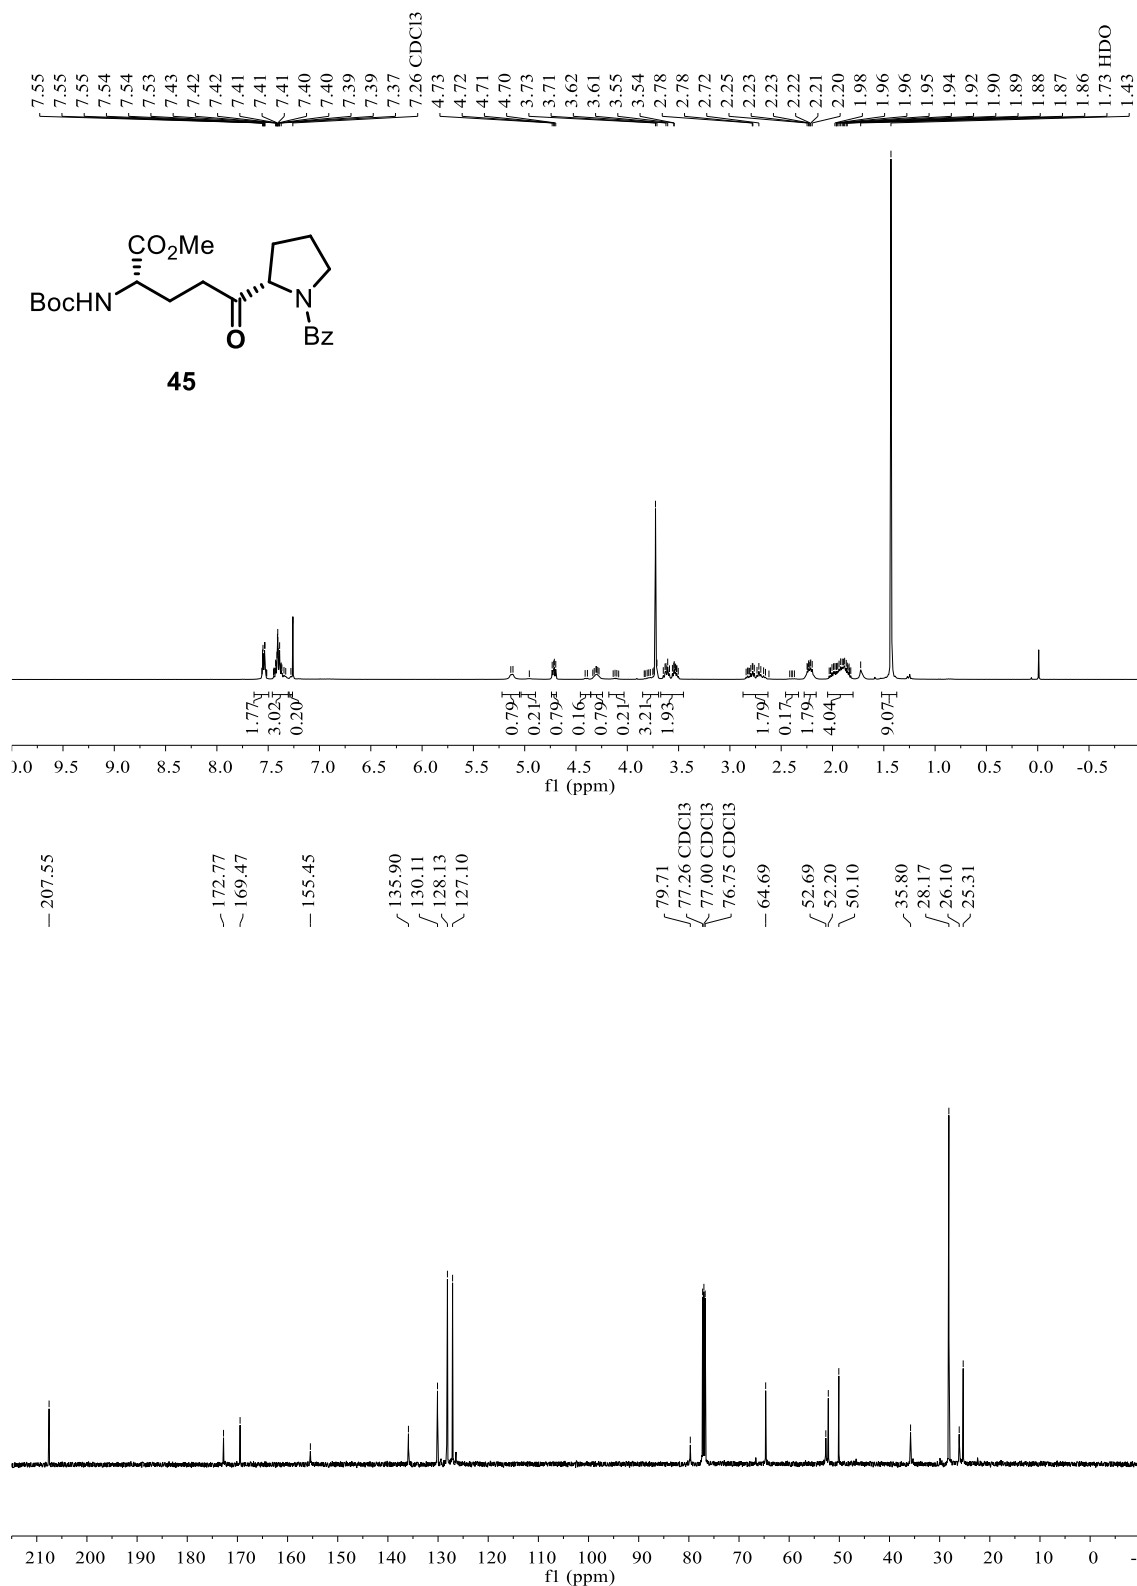

**Supplementary Fig. 51**  $^1\text{H}$  NMR (400 MHz,  $\text{CDCl}_3$ ) and  $^{13}\text{C}$  NMR (126 MHz,  $\text{CDCl}_3$ ) spectrum of **45**.

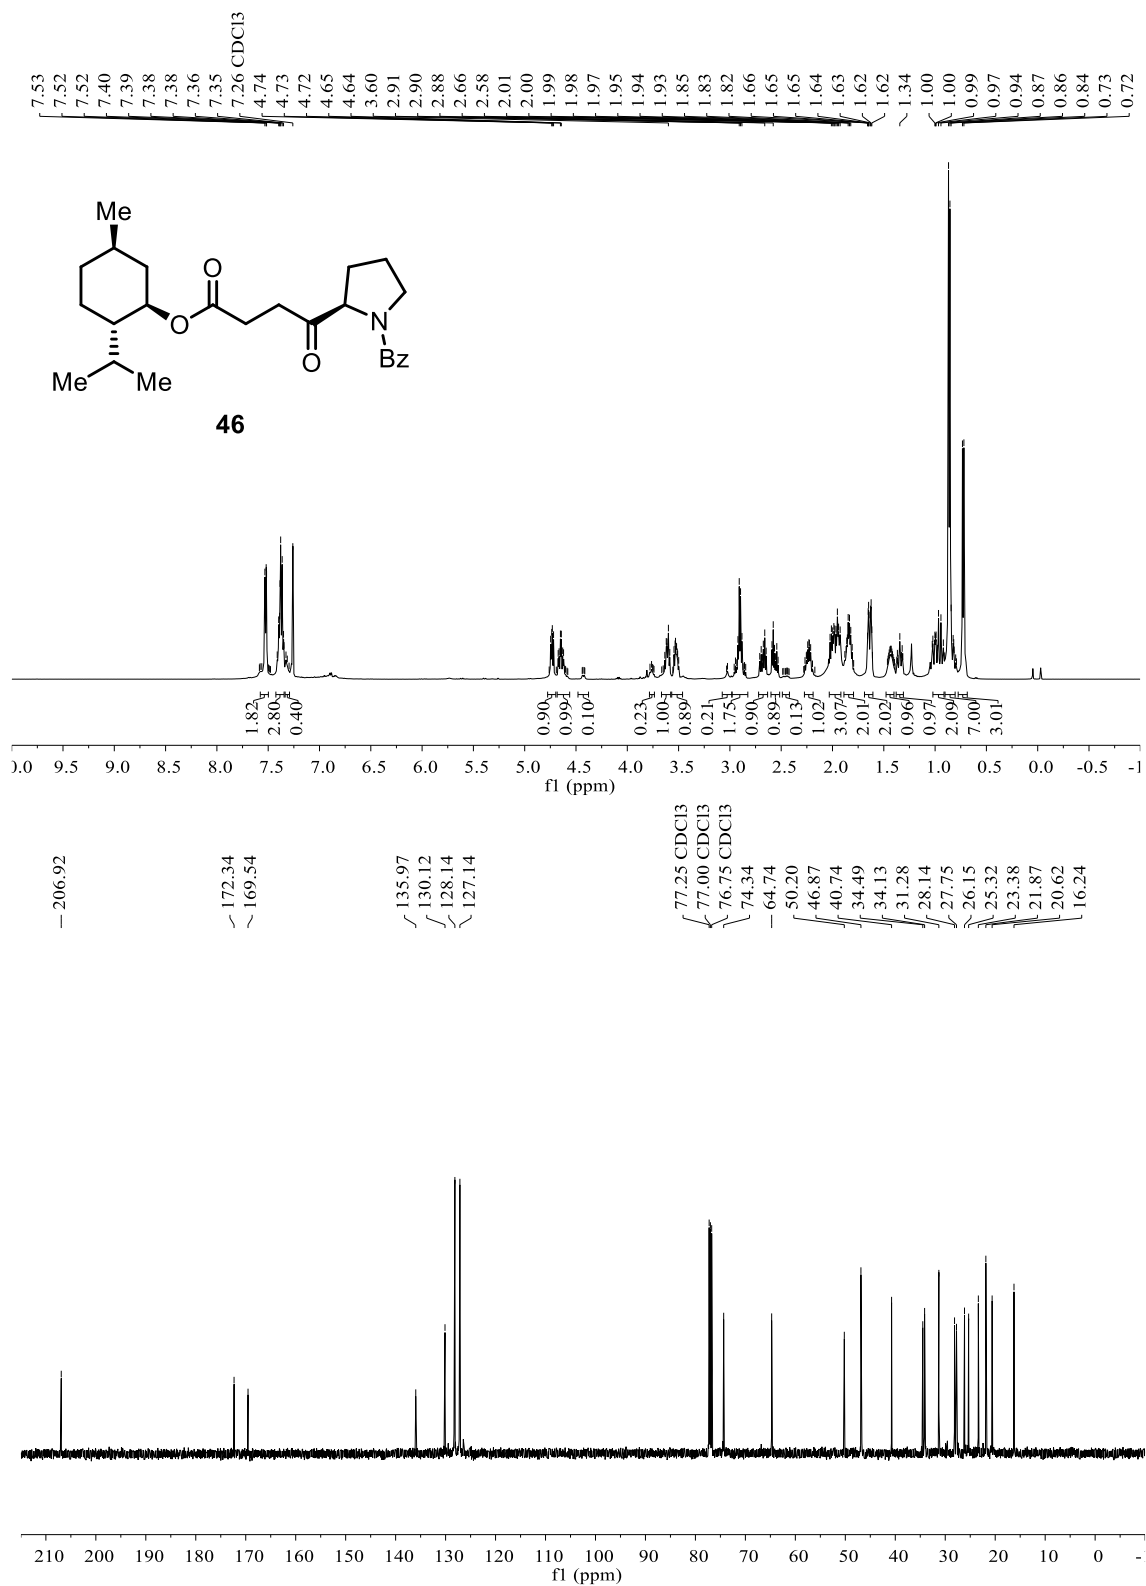

**Supplementary Fig. 52**  $^1\text{H}$  NMR (500 MHz,  $\text{CDCl}_3$ ) and  $^{13}\text{C}$  NMR (126 MHz,  $\text{CDCl}_3$ ) spectrum of **46**.

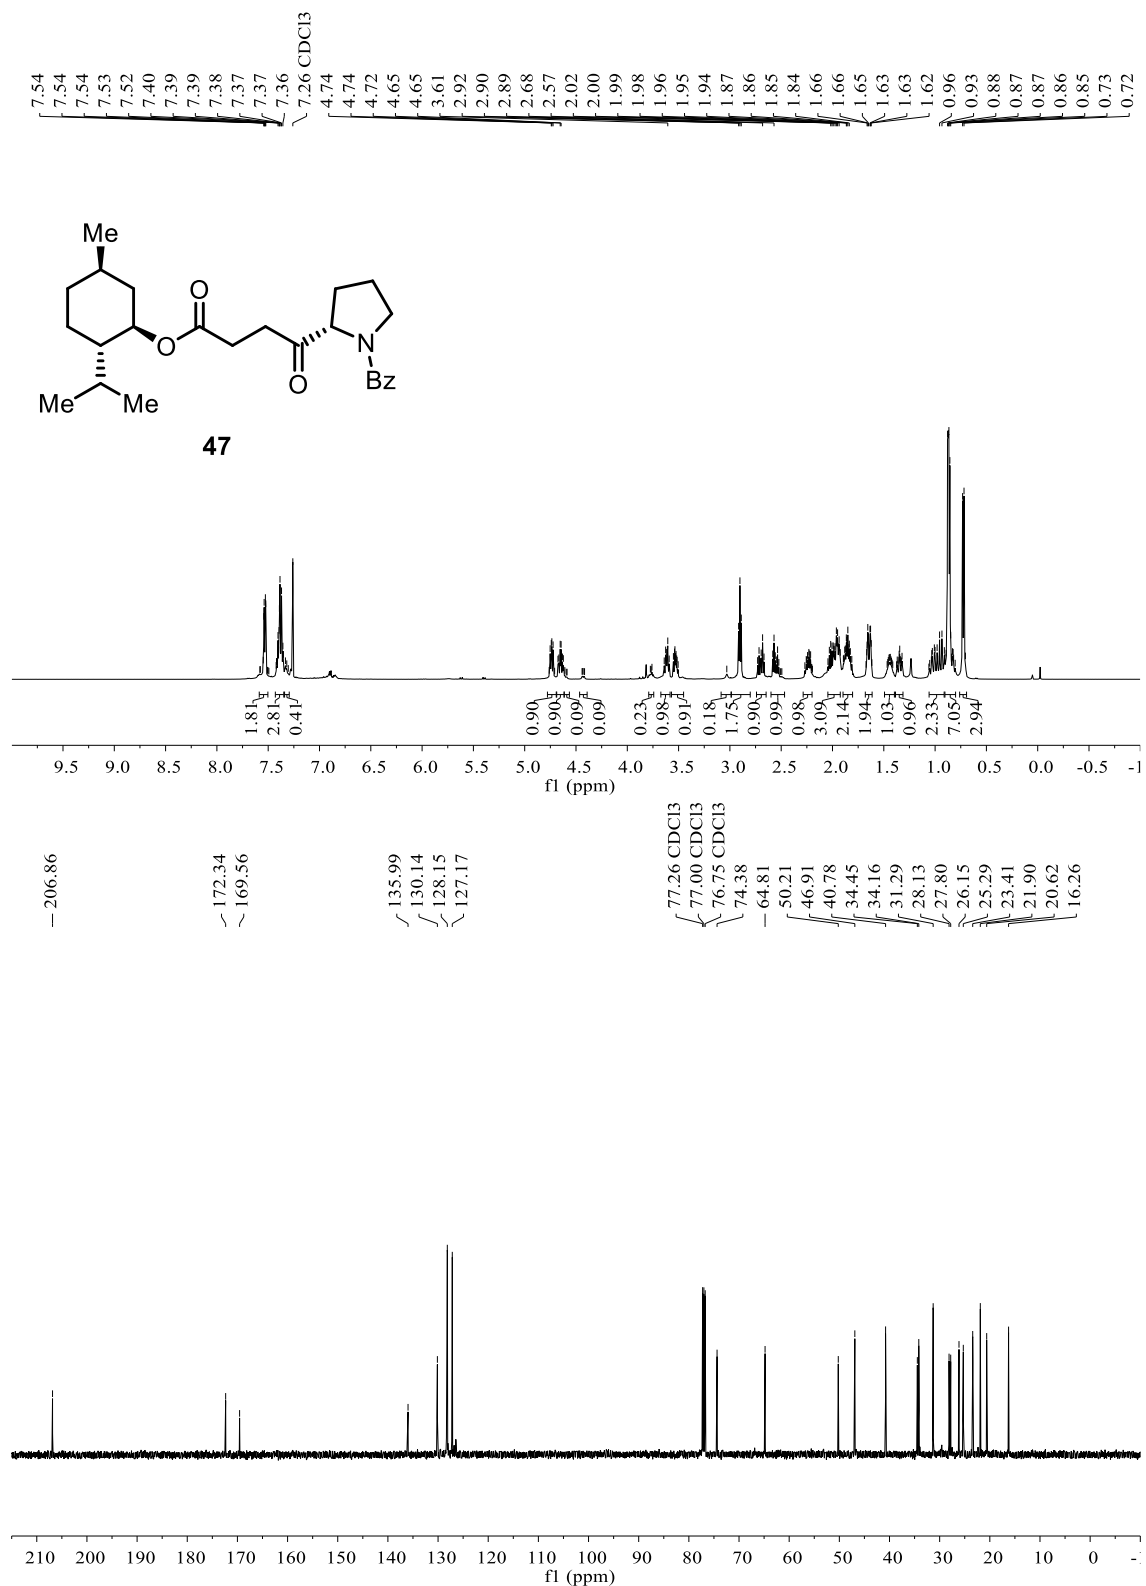

**Supplementary Fig. 53** <sup>1</sup>H NMR (500 MHz, CDCl<sub>3</sub>) and <sup>13</sup>C NMR (126 MHz, CDCl<sub>3</sub>) spectrum of **47**.

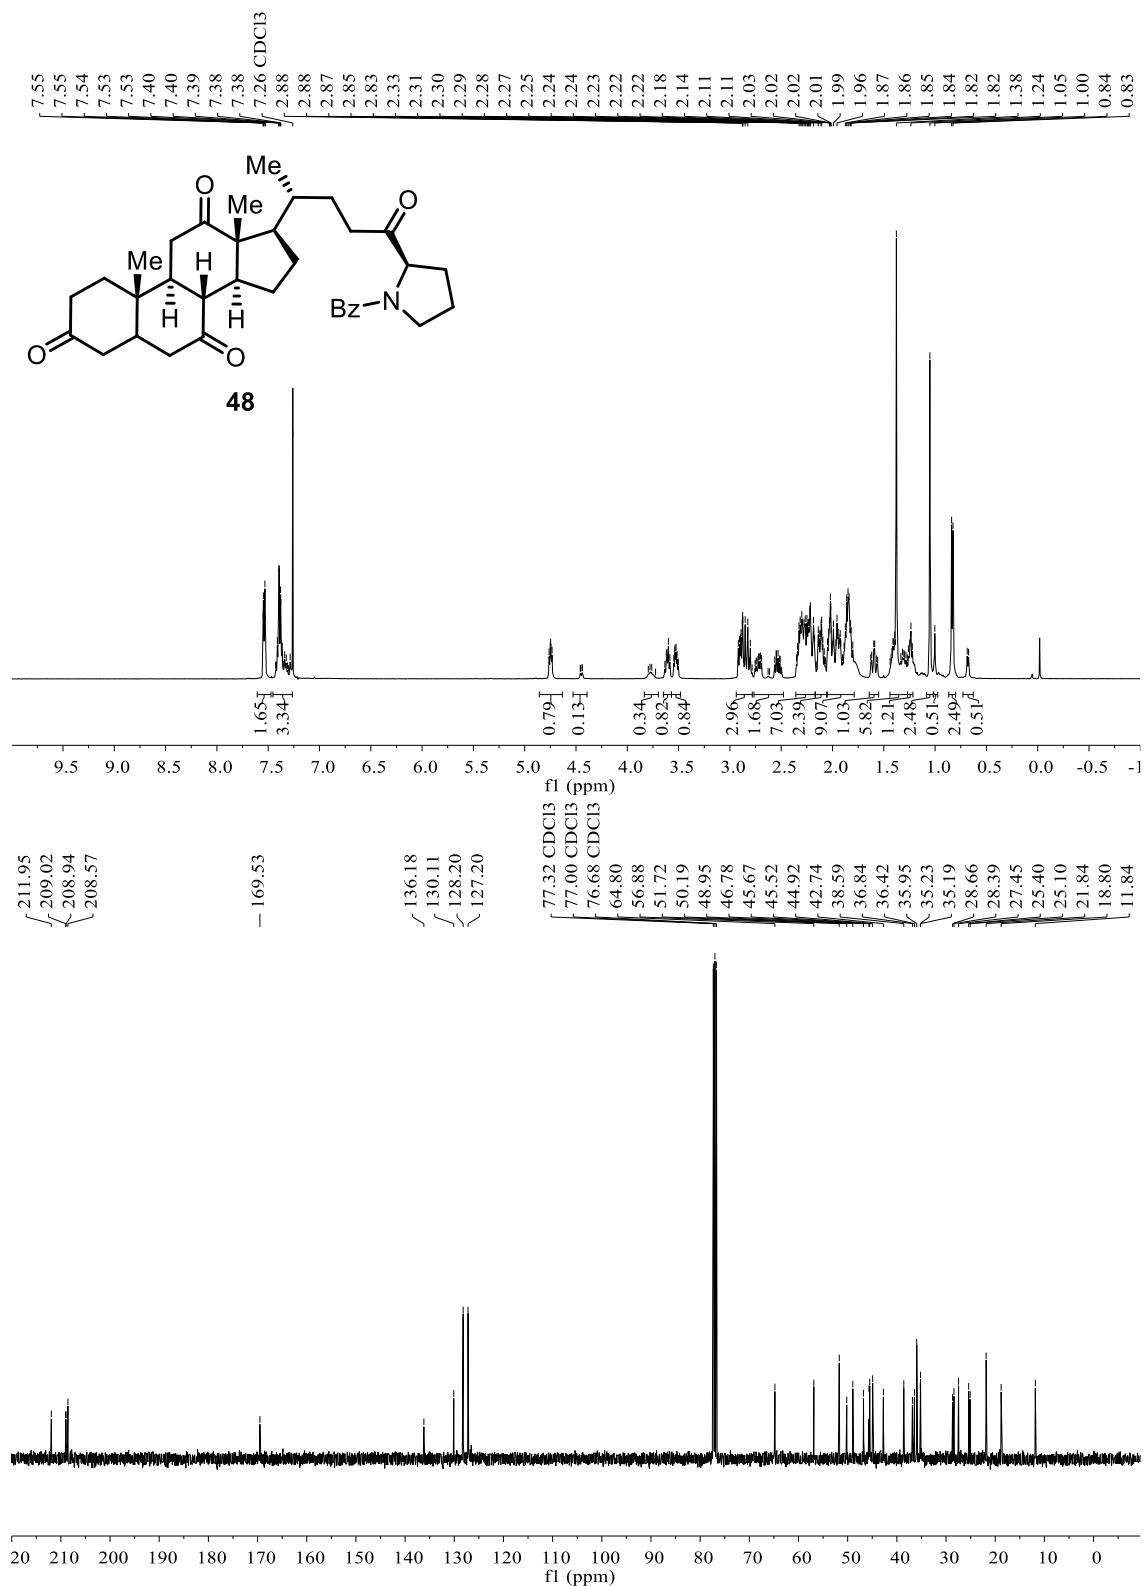

**Supplementary Fig. 54** <sup>1</sup>H NMR (500 MHz, CDCl<sub>3</sub>) and <sup>13</sup>C NMR (101 MHz, CDCl<sub>3</sub>) spectrum of 48.

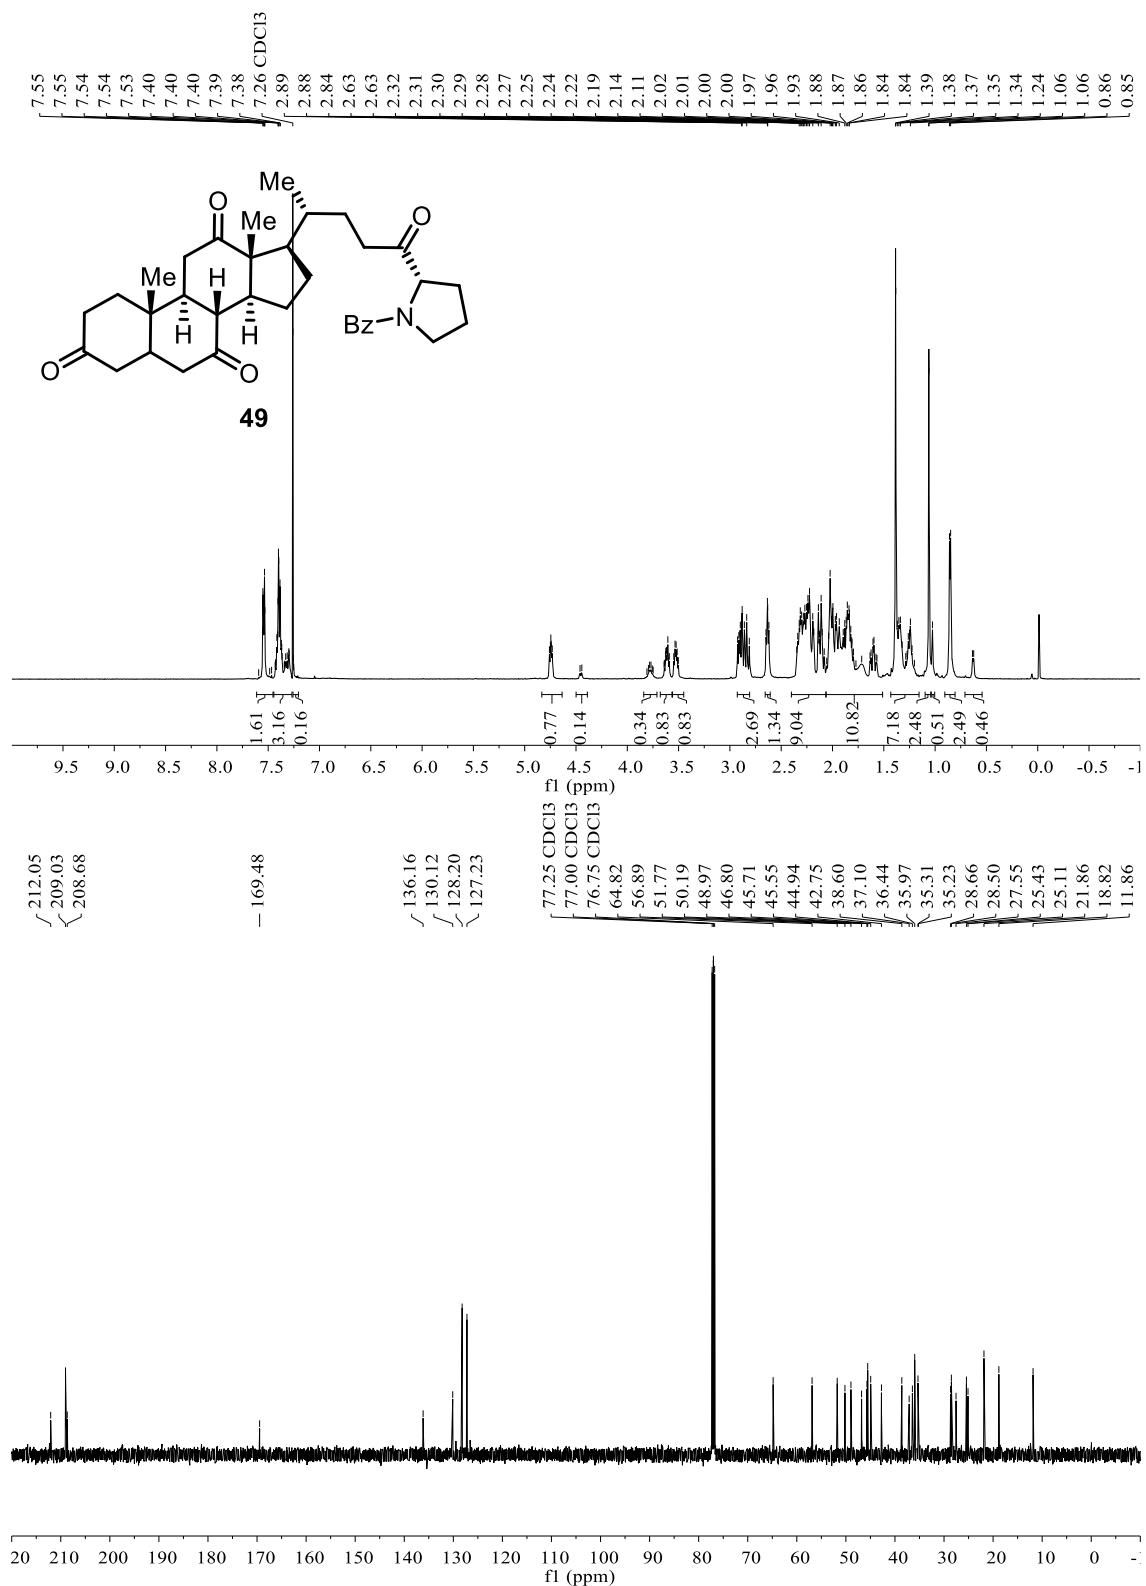

**Supplementary Fig. 55** <sup>1</sup>H NMR (500 MHz, CDCl<sub>3</sub>) and <sup>13</sup>C NMR (126 MHz, CDCl<sub>3</sub>) spectrum of **49**.

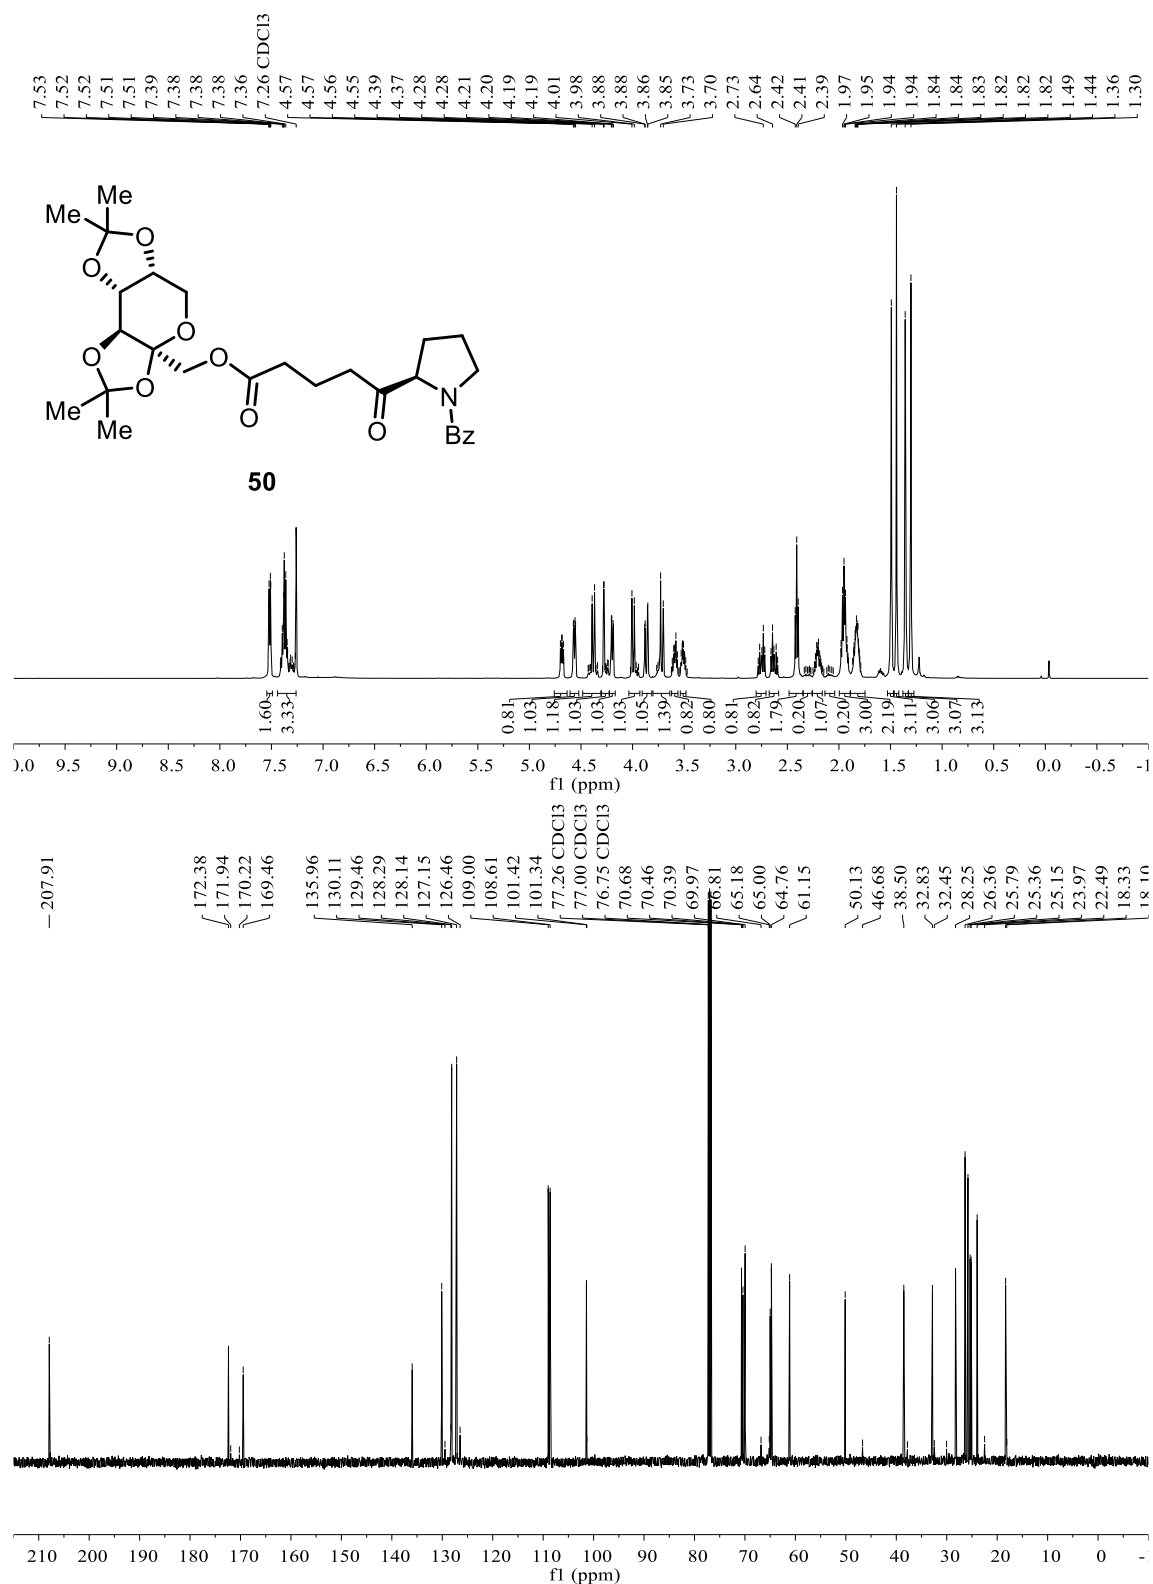

**Supplementary Fig. S56**  $^1\text{H}$  NMR (500 MHz,  $\text{CDCl}_3$ ) and  $^{13}\text{C}$  NMR (126 MHz,  $\text{CDCl}_3$ ) spectrum of **50**.

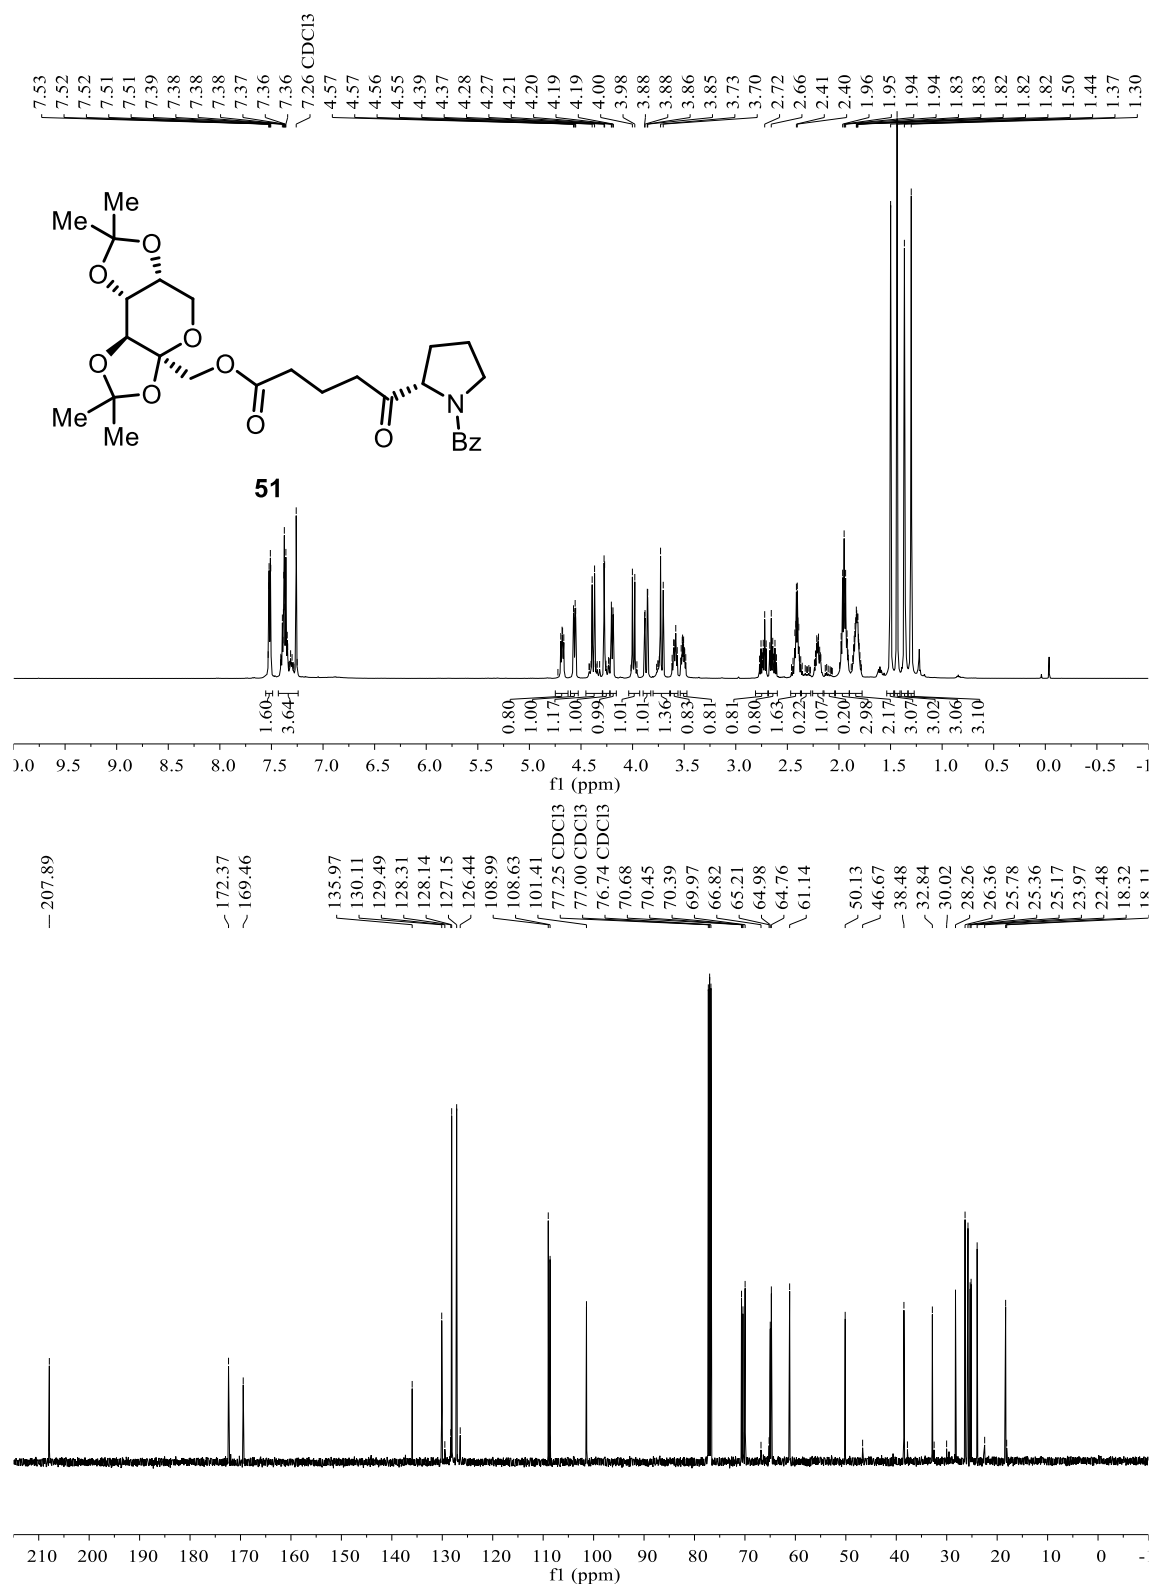

**Supplementary Fig. 57**  $^1\text{H}$  NMR (500 MHz,  $\text{CDCl}_3$ ) and  $^{13}\text{C}$  NMR (126 MHz,  $\text{CDCl}_3$ ) spectrum of **51**.

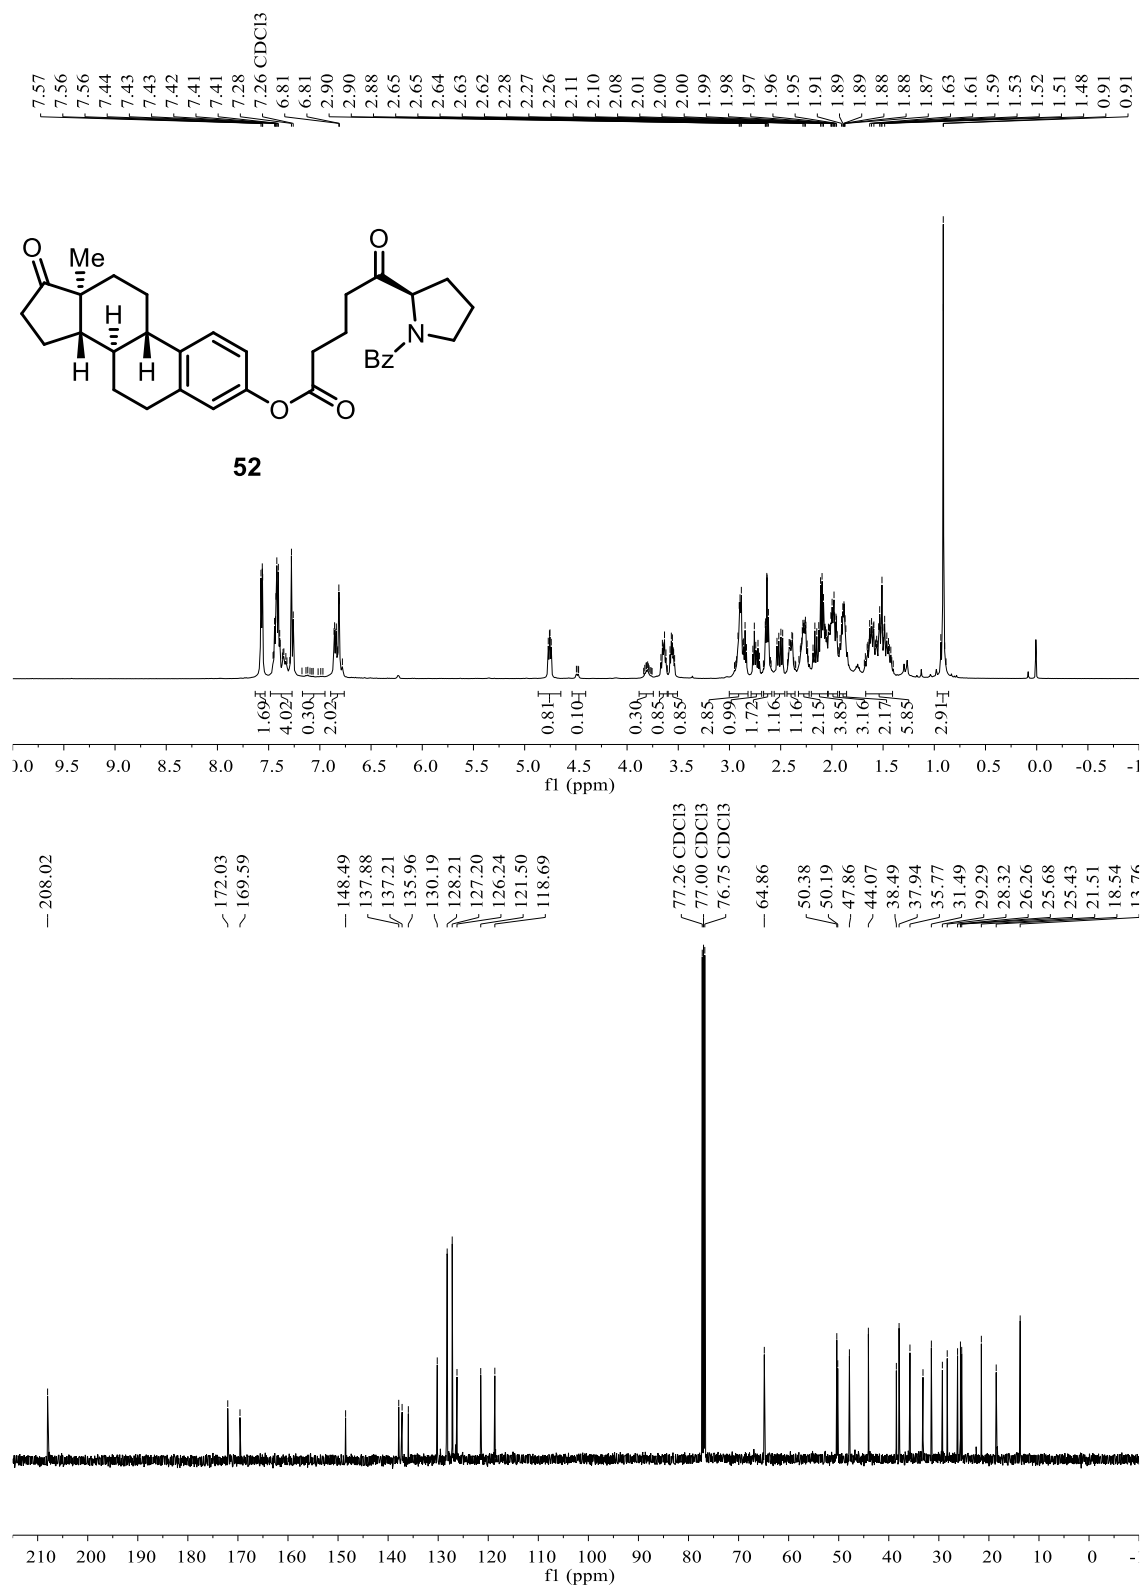

**Supplementary Fig. S8** <sup>1</sup>H NMR (500 MHz, CDCl<sub>3</sub>) and <sup>13</sup>C NMR (126 MHz, CDCl<sub>3</sub>) spectrum of **52**.

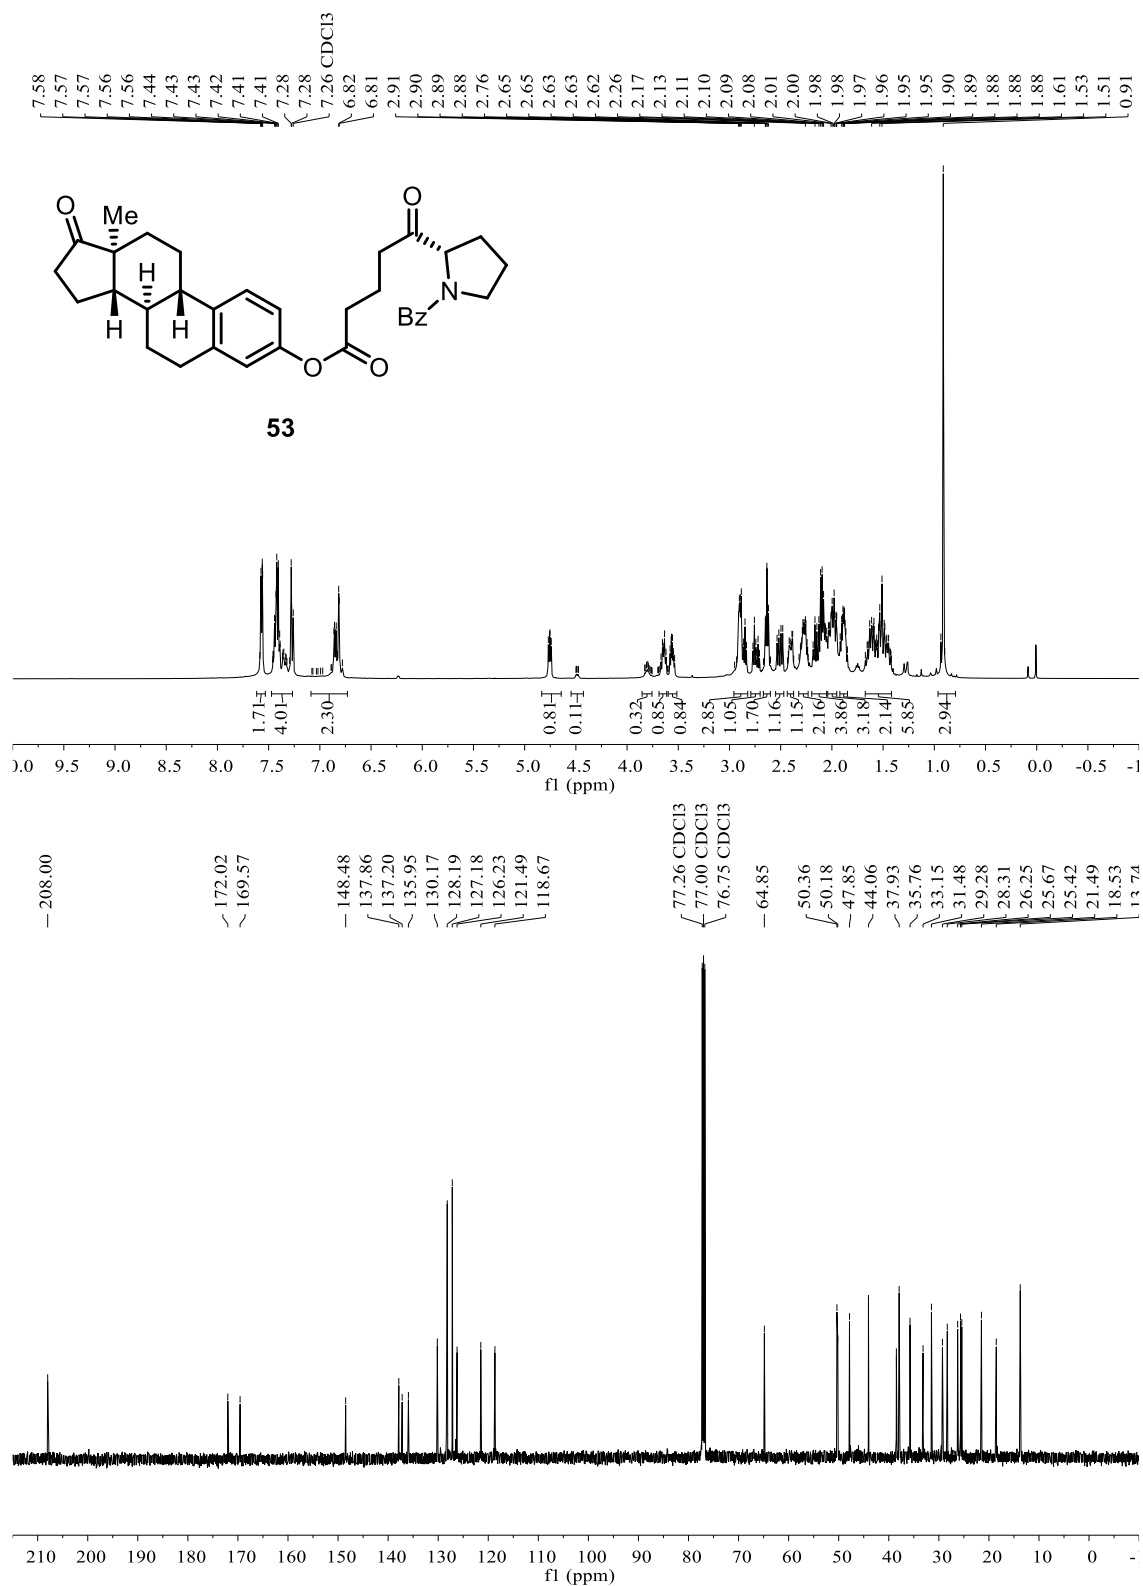

**Supplementary Fig. 59** <sup>1</sup>H NMR (500 MHz, CDCl<sub>3</sub>) and <sup>13</sup>C NMR (126 MHz, CDCl<sub>3</sub>) spectrum of **53**.

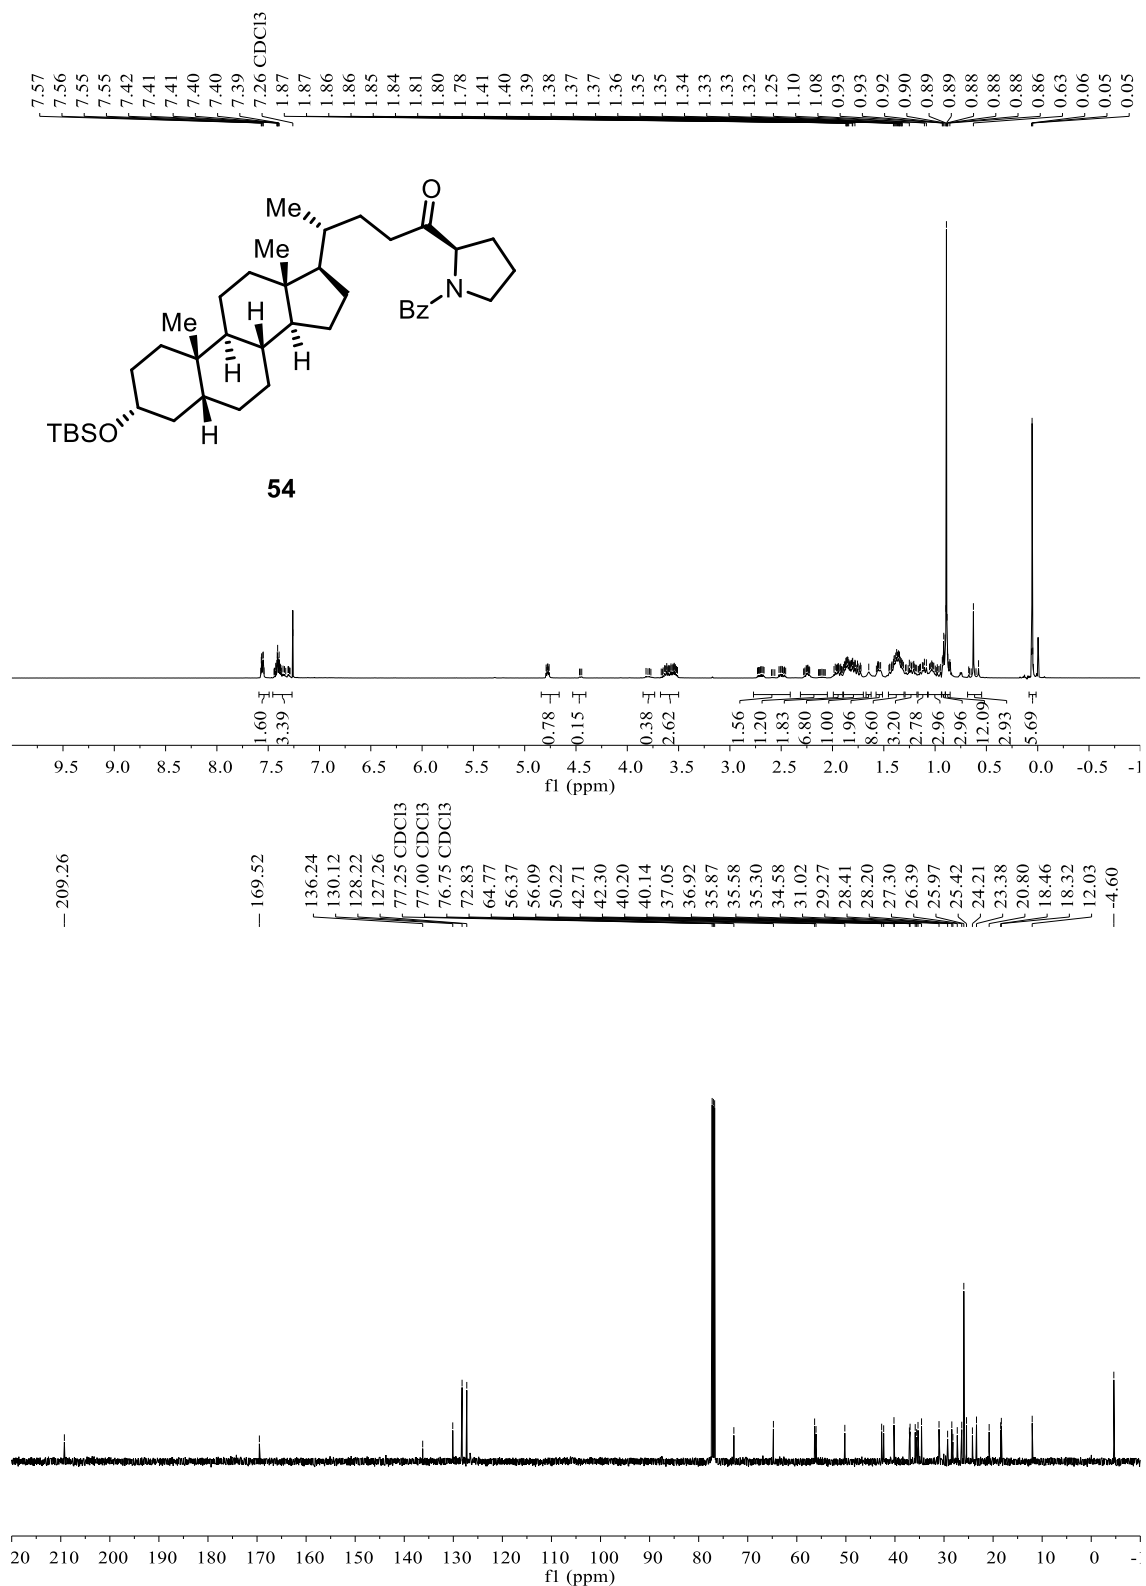

**Supplementary Fig. 60**  $^1\text{H}$  NMR (500 MHz,  $\text{CDCl}_3$ ) and  $^{13}\text{C}$  NMR (126 MHz,  $\text{CDCl}_3$ ) spectrum of **54**.

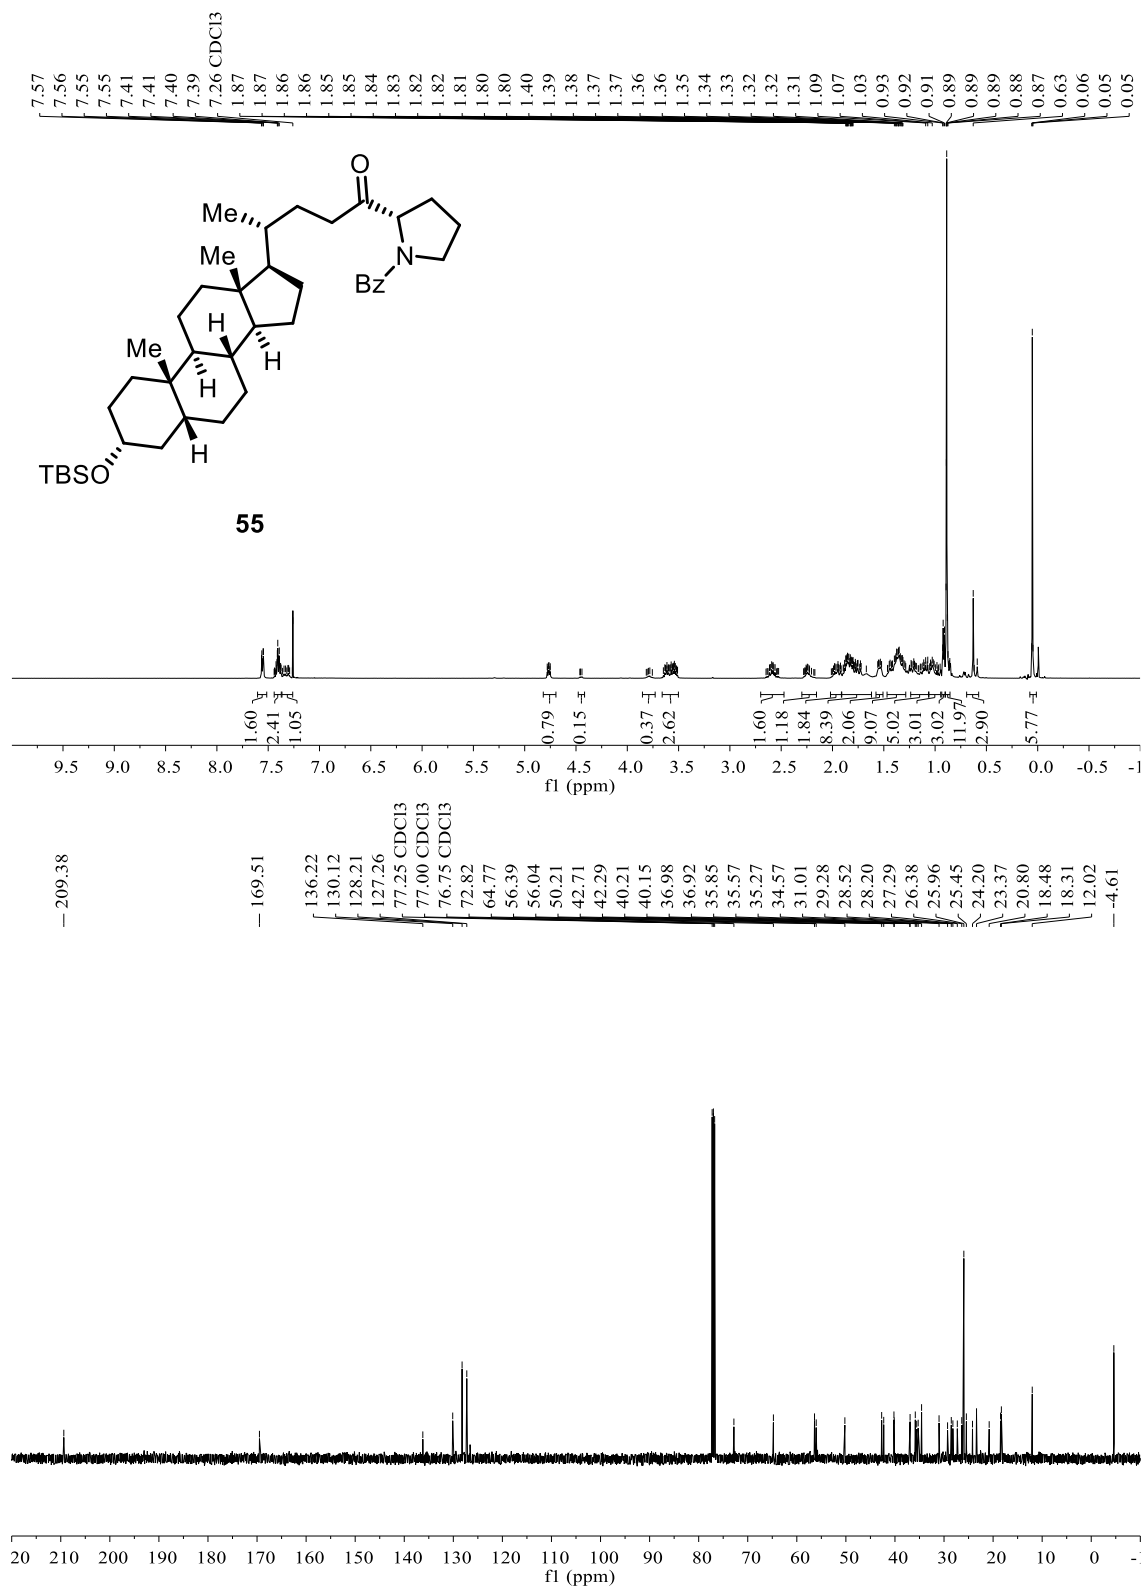

**Supplementary Fig. 61**  $^1\text{H}$  NMR (500 MHz,  $\text{CDCl}_3$ ) and  $^{13}\text{C}$  NMR (126 MHz,  $\text{CDCl}_3$ ) spectrum of **55**.

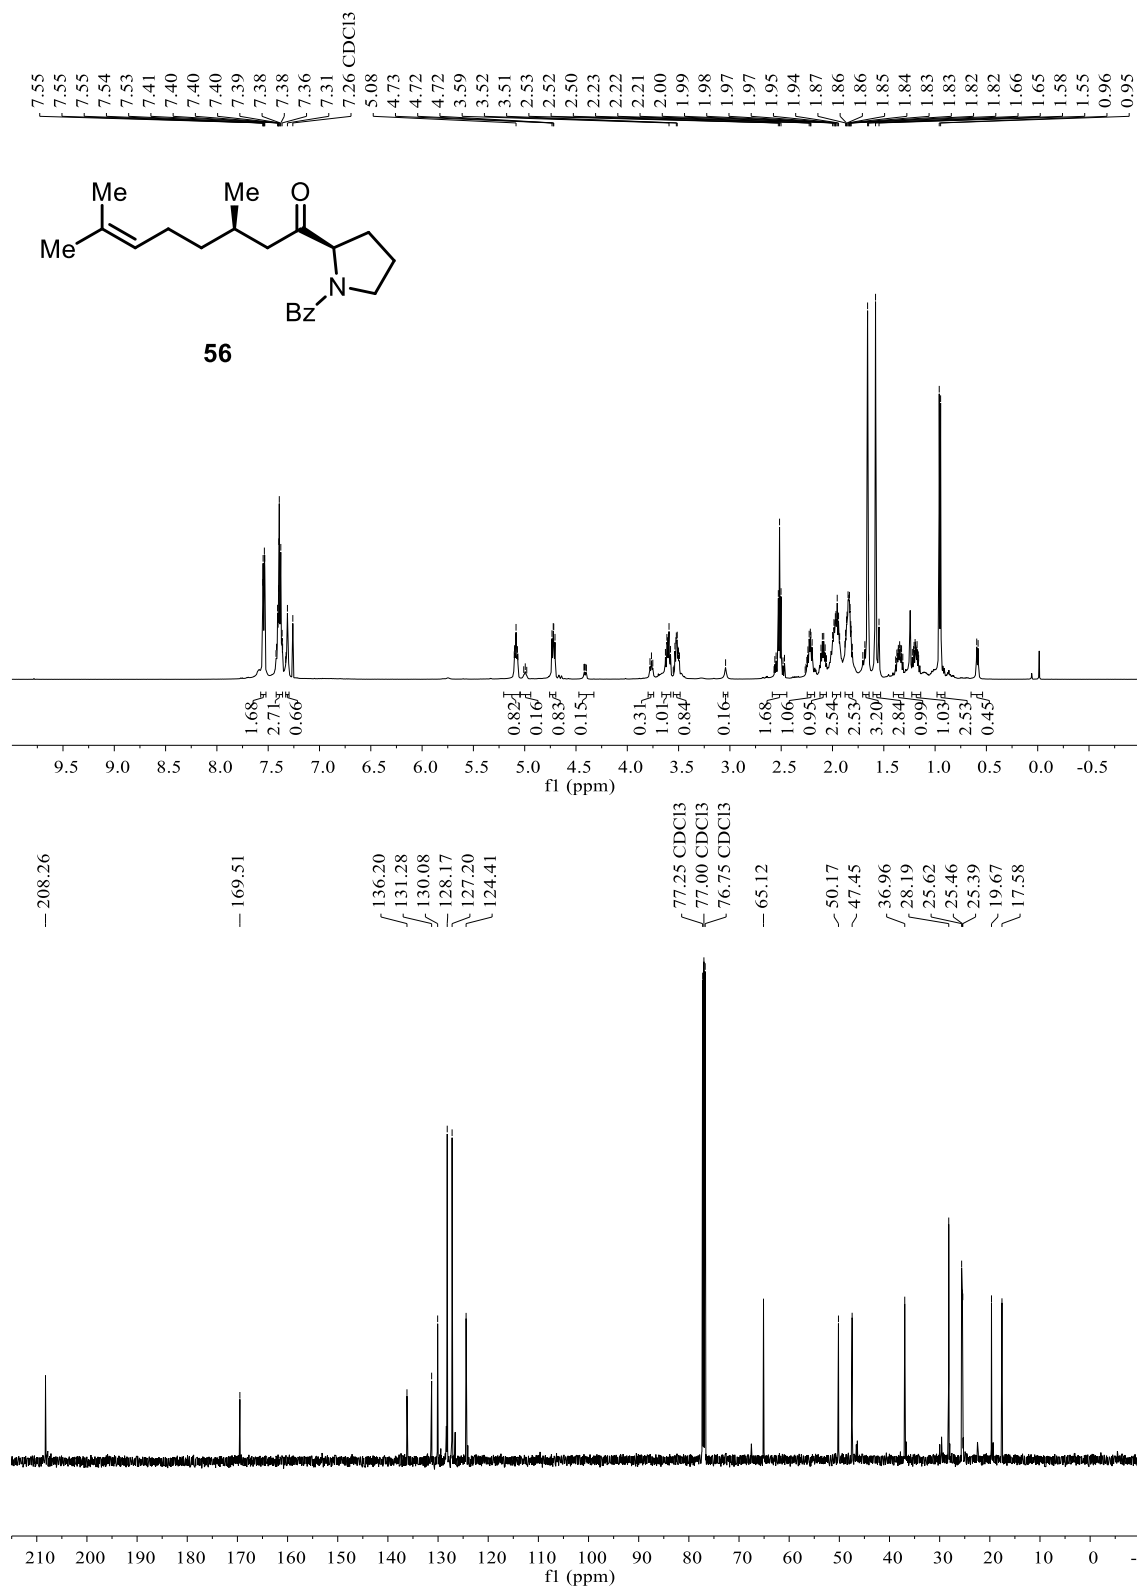

**Supplementary Fig. 62** <sup>1</sup>H NMR (500 MHz, CDCl<sub>3</sub>) and <sup>13</sup>C NMR (126 MHz, CDCl<sub>3</sub>) spectrum of **56**.

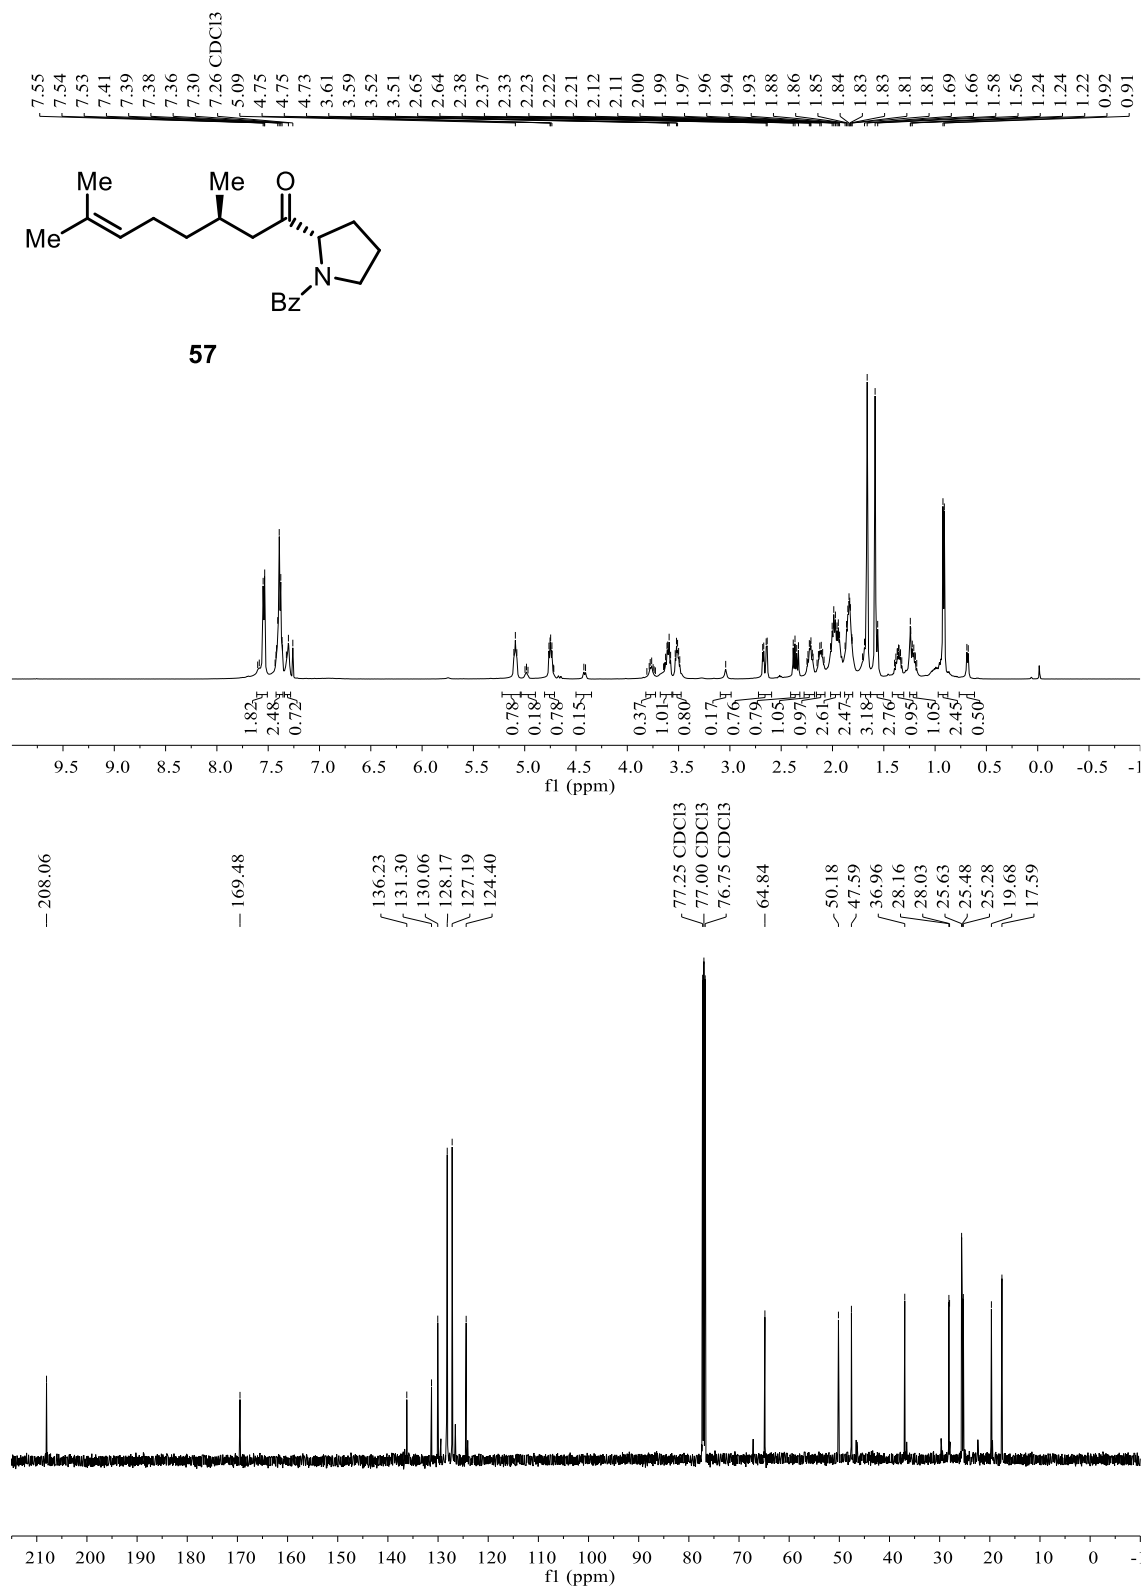

**Supplementary Fig. 63**  $^1\text{H}$  NMR (500 MHz,  $\text{CDCl}_3$ ) and  $^{13}\text{C}$  NMR (126 MHz,  $\text{CDCl}_3$ ) spectrum of **57**.

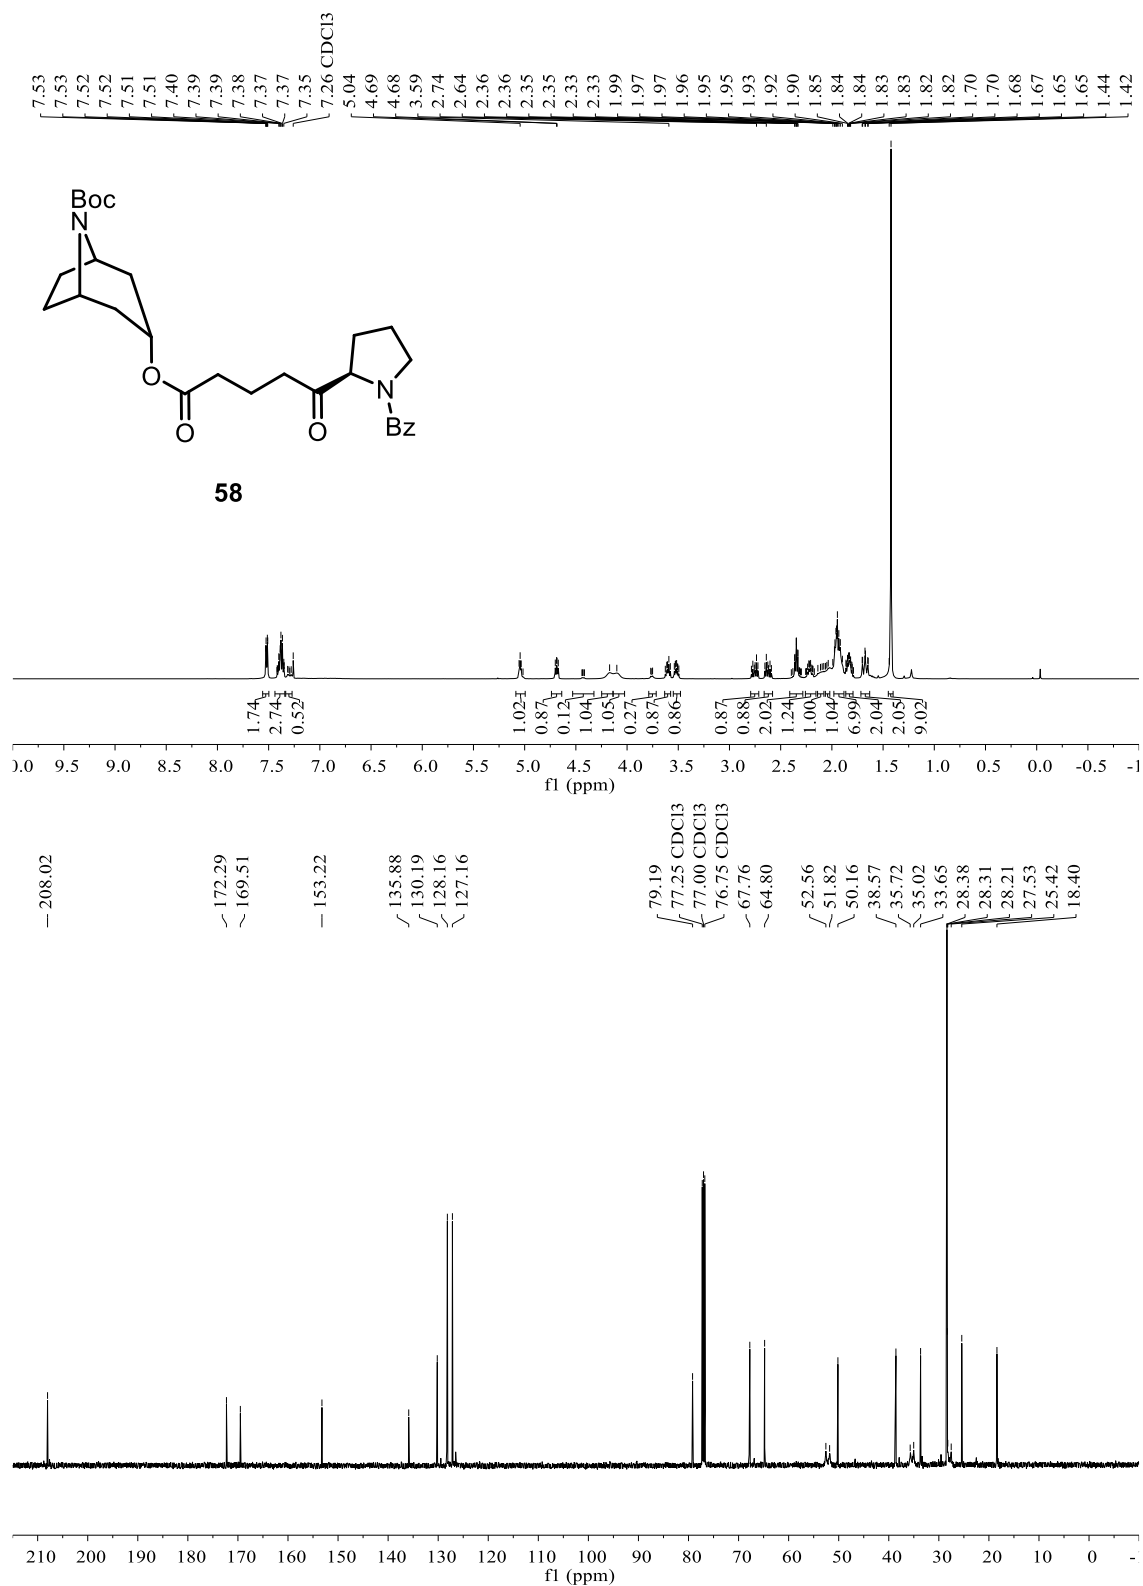

**Supplementary Fig. 64**  $^1\text{H}$  NMR (500 MHz,  $\text{CDCl}_3$ ) and  $^{13}\text{C}$  NMR (126 MHz,  $\text{CDCl}_3$ ) spectrum of **58**.

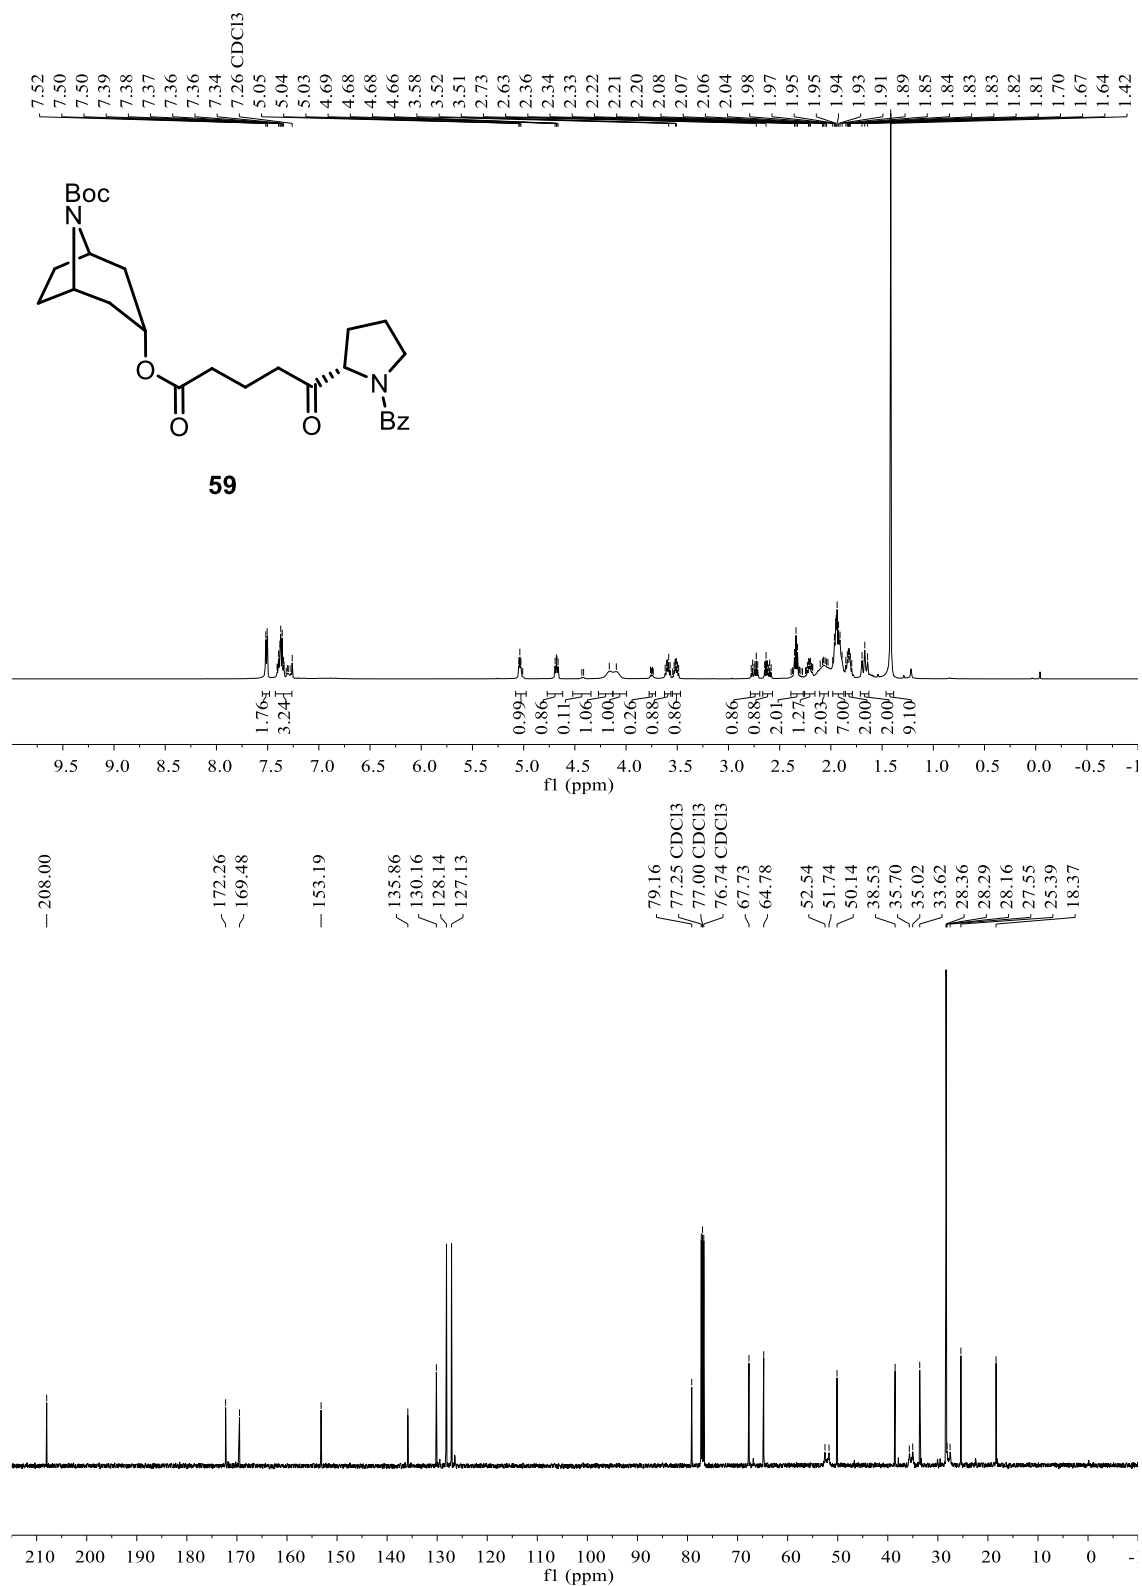

**Supplementary Fig. 65**  $^1\text{H}$  NMR (500 MHz,  $\text{CDCl}_3$ ) and  $^{13}\text{C}$  NMR (126 MHz,  $\text{CDCl}_3$ ) spectrum of **59**.

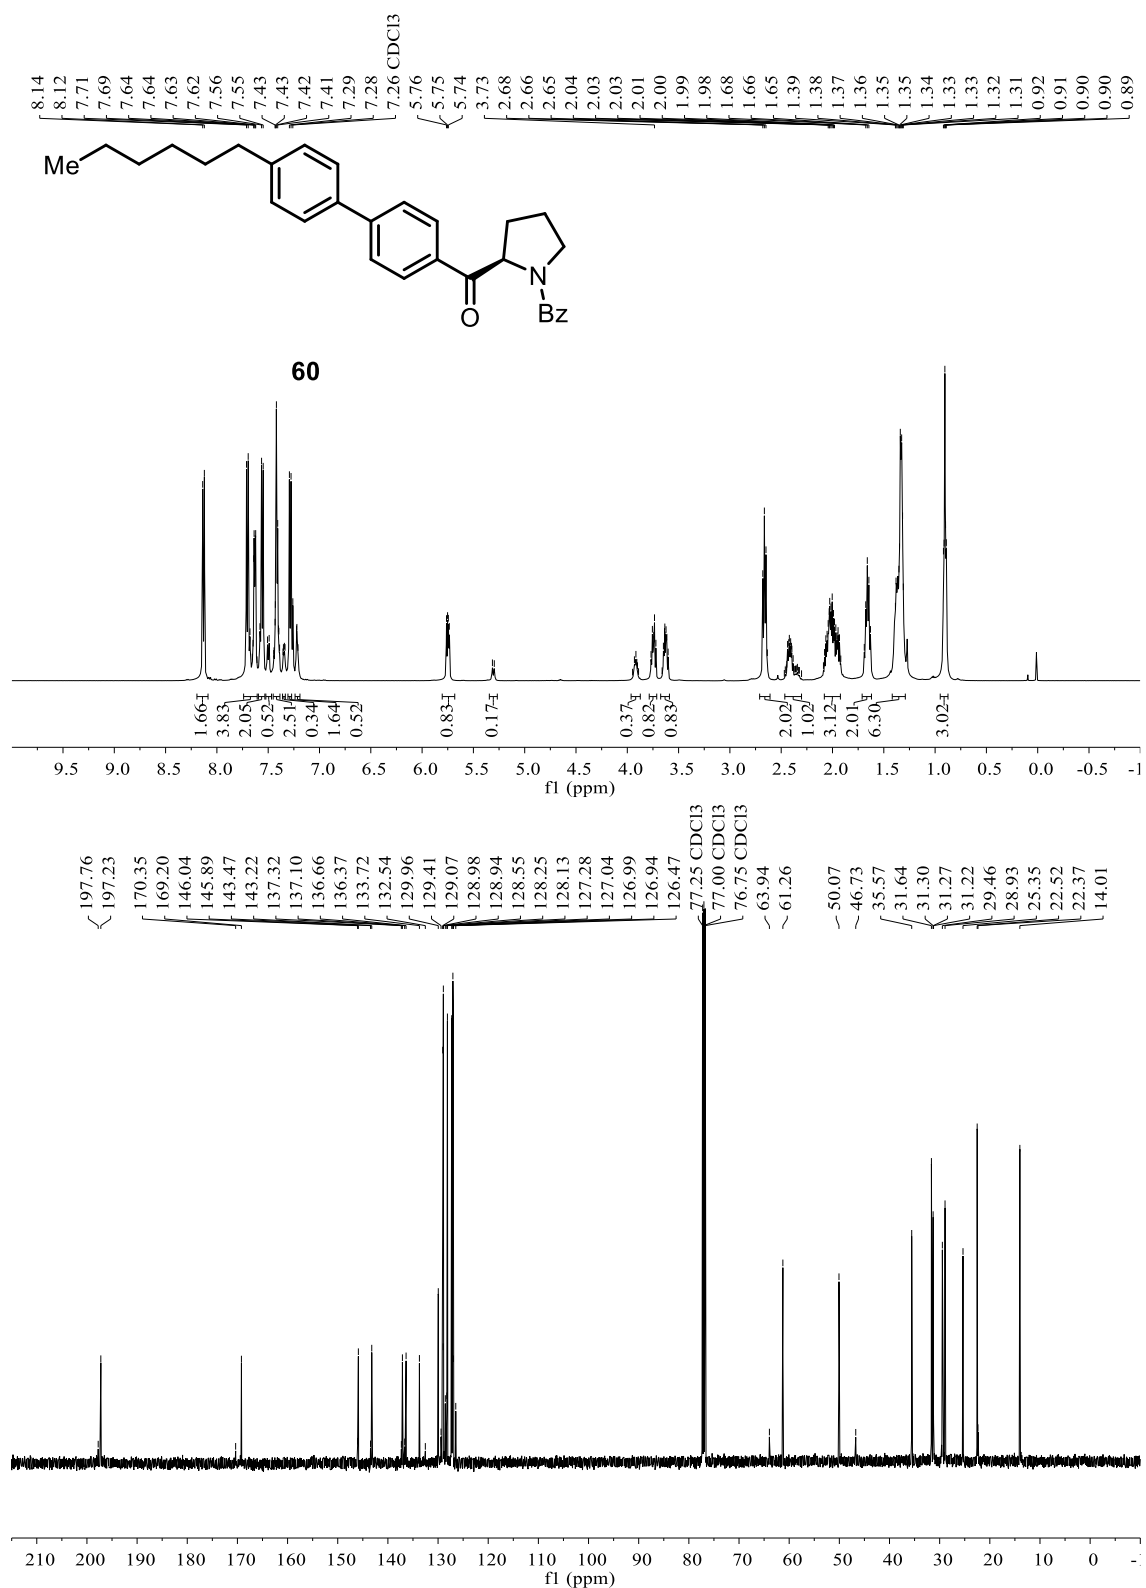

**Supplementary Fig. 66**  $^1\text{H}$  NMR (500 MHz,  $\text{CDCl}_3$ ) and  $^{13}\text{C}$  NMR (126 MHz,  $\text{CDCl}_3$ ) spectrum of **60**.

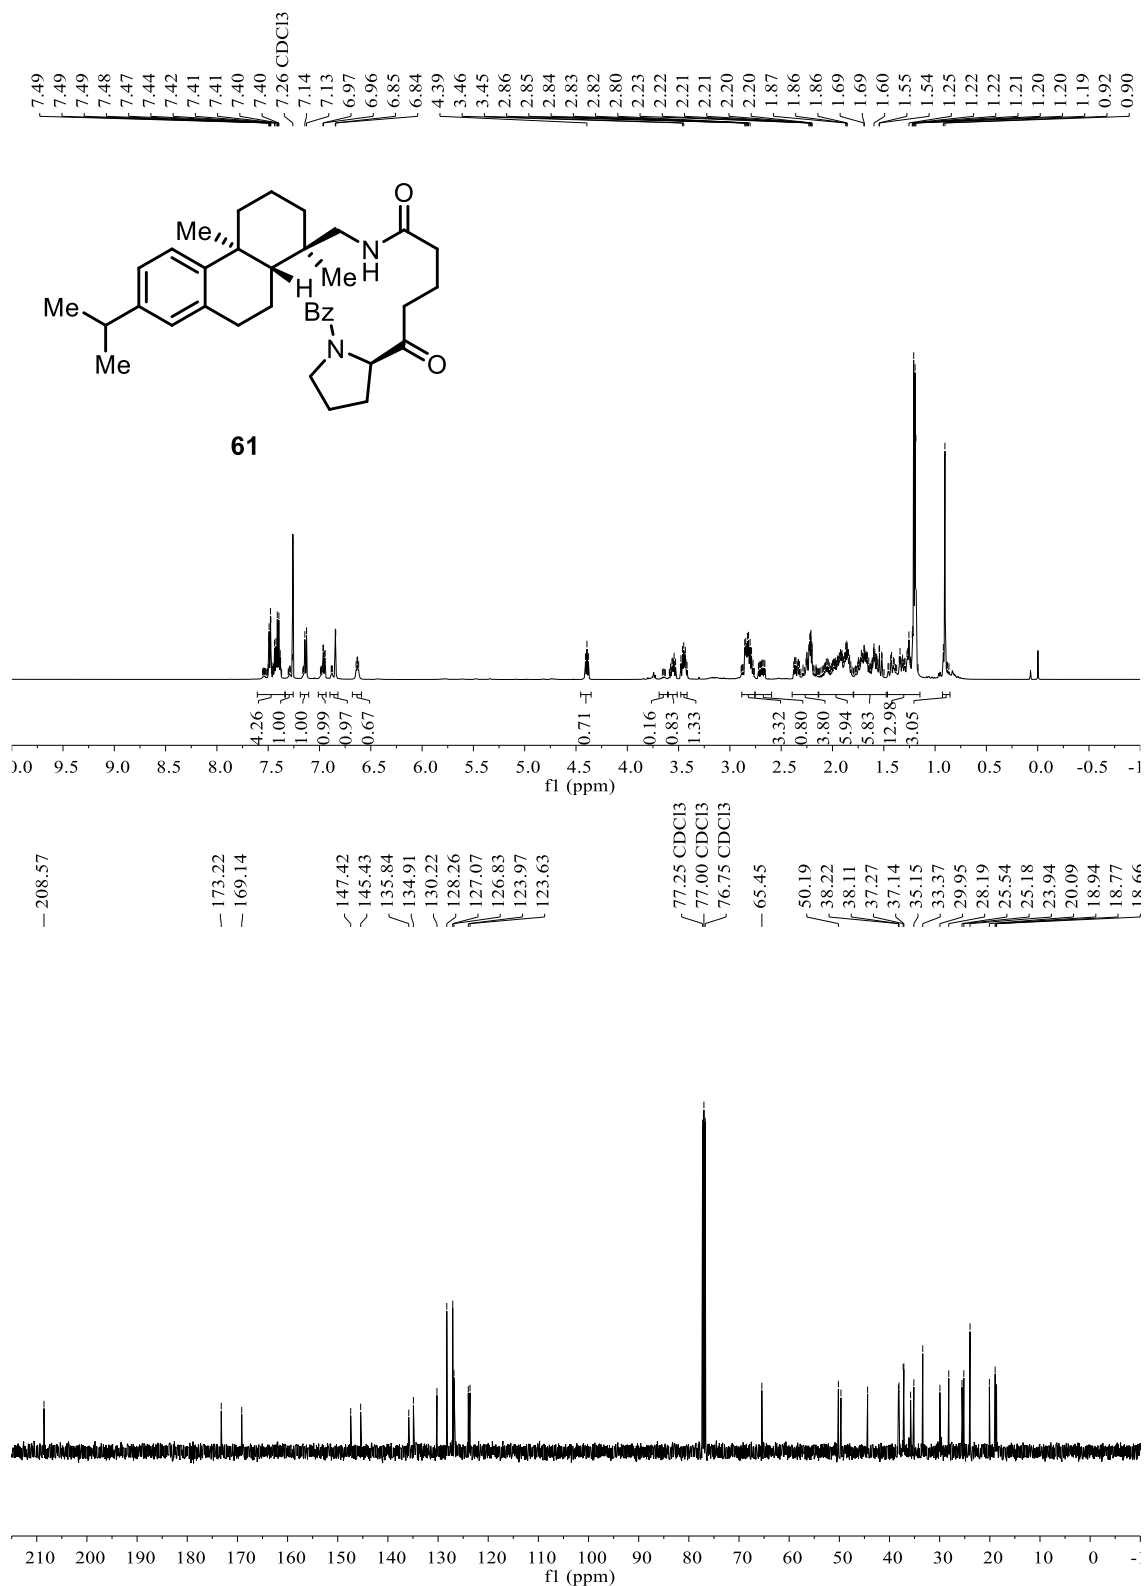

**Supplementary Fig. 67**  $^1\text{H}$  NMR (500 MHz,  $\text{CDCl}_3$ ) and  $^{13}\text{C}$  NMR (126 MHz,  $\text{CDCl}_3$ ) spectrum of **61**.

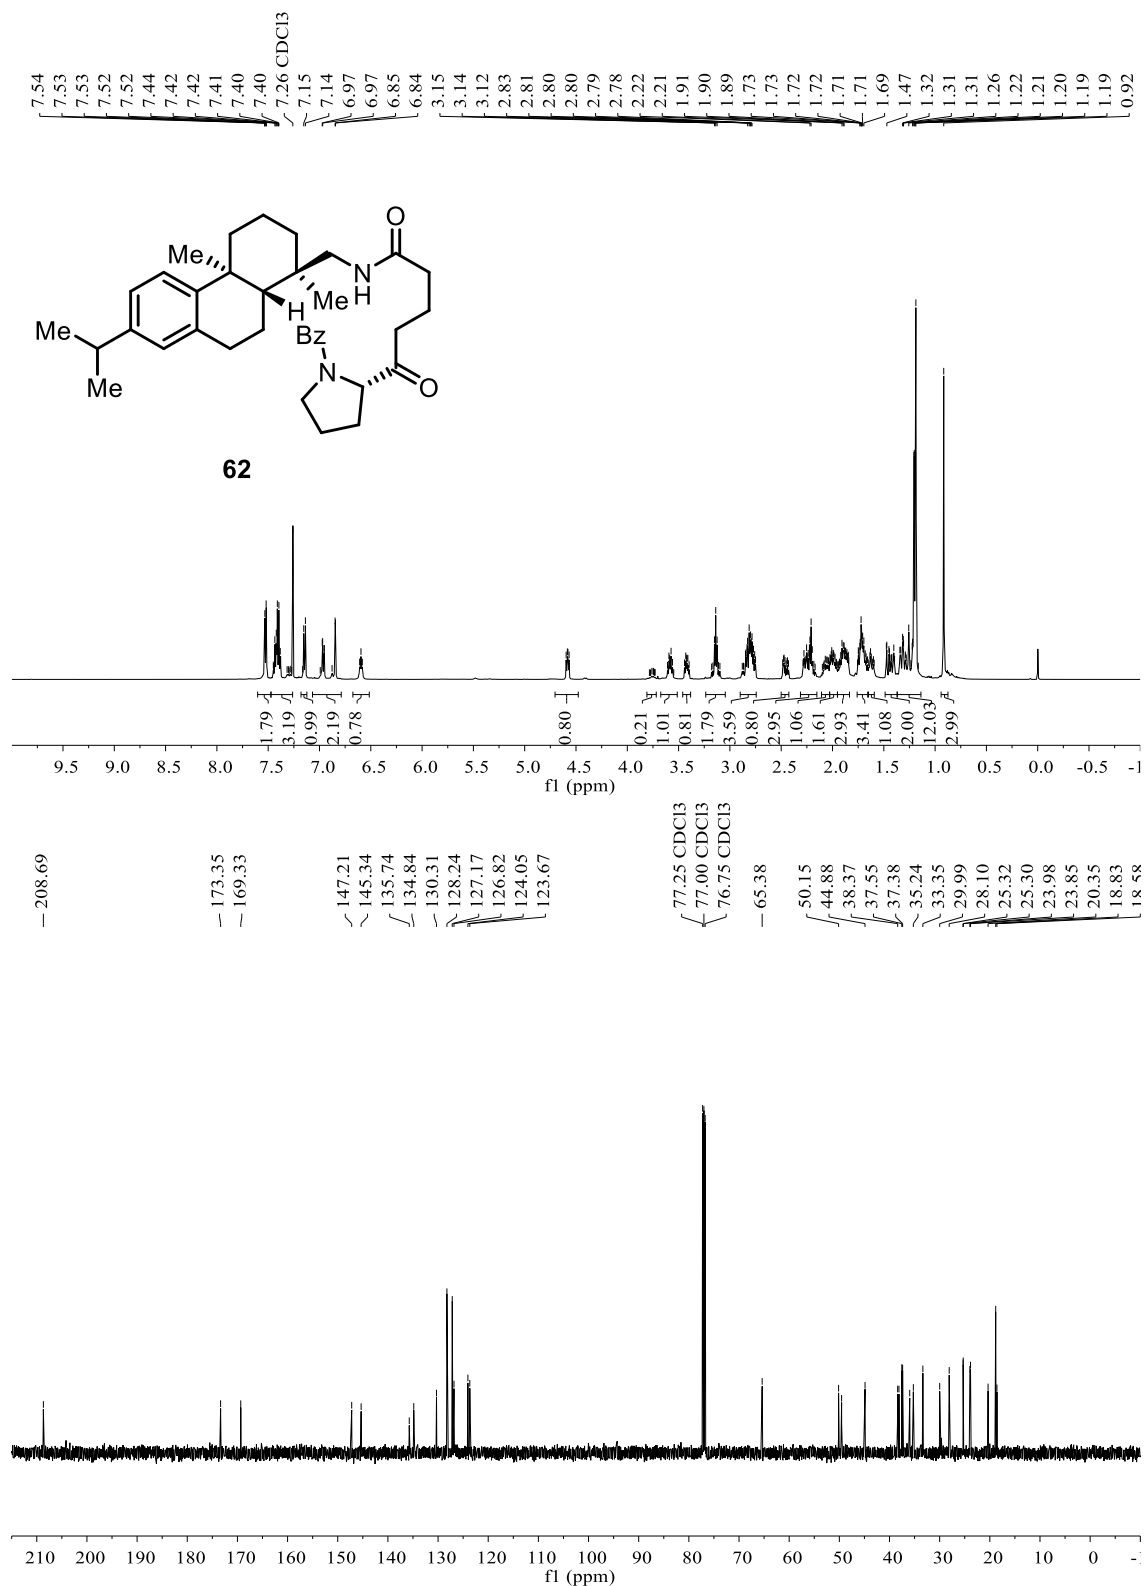

**Supplementary Fig. 68** <sup>1</sup>H NMR (500 MHz, CDCl<sub>3</sub>) and <sup>13</sup>C NMR (126 MHz, CDCl<sub>3</sub>) spectrum of **62**.

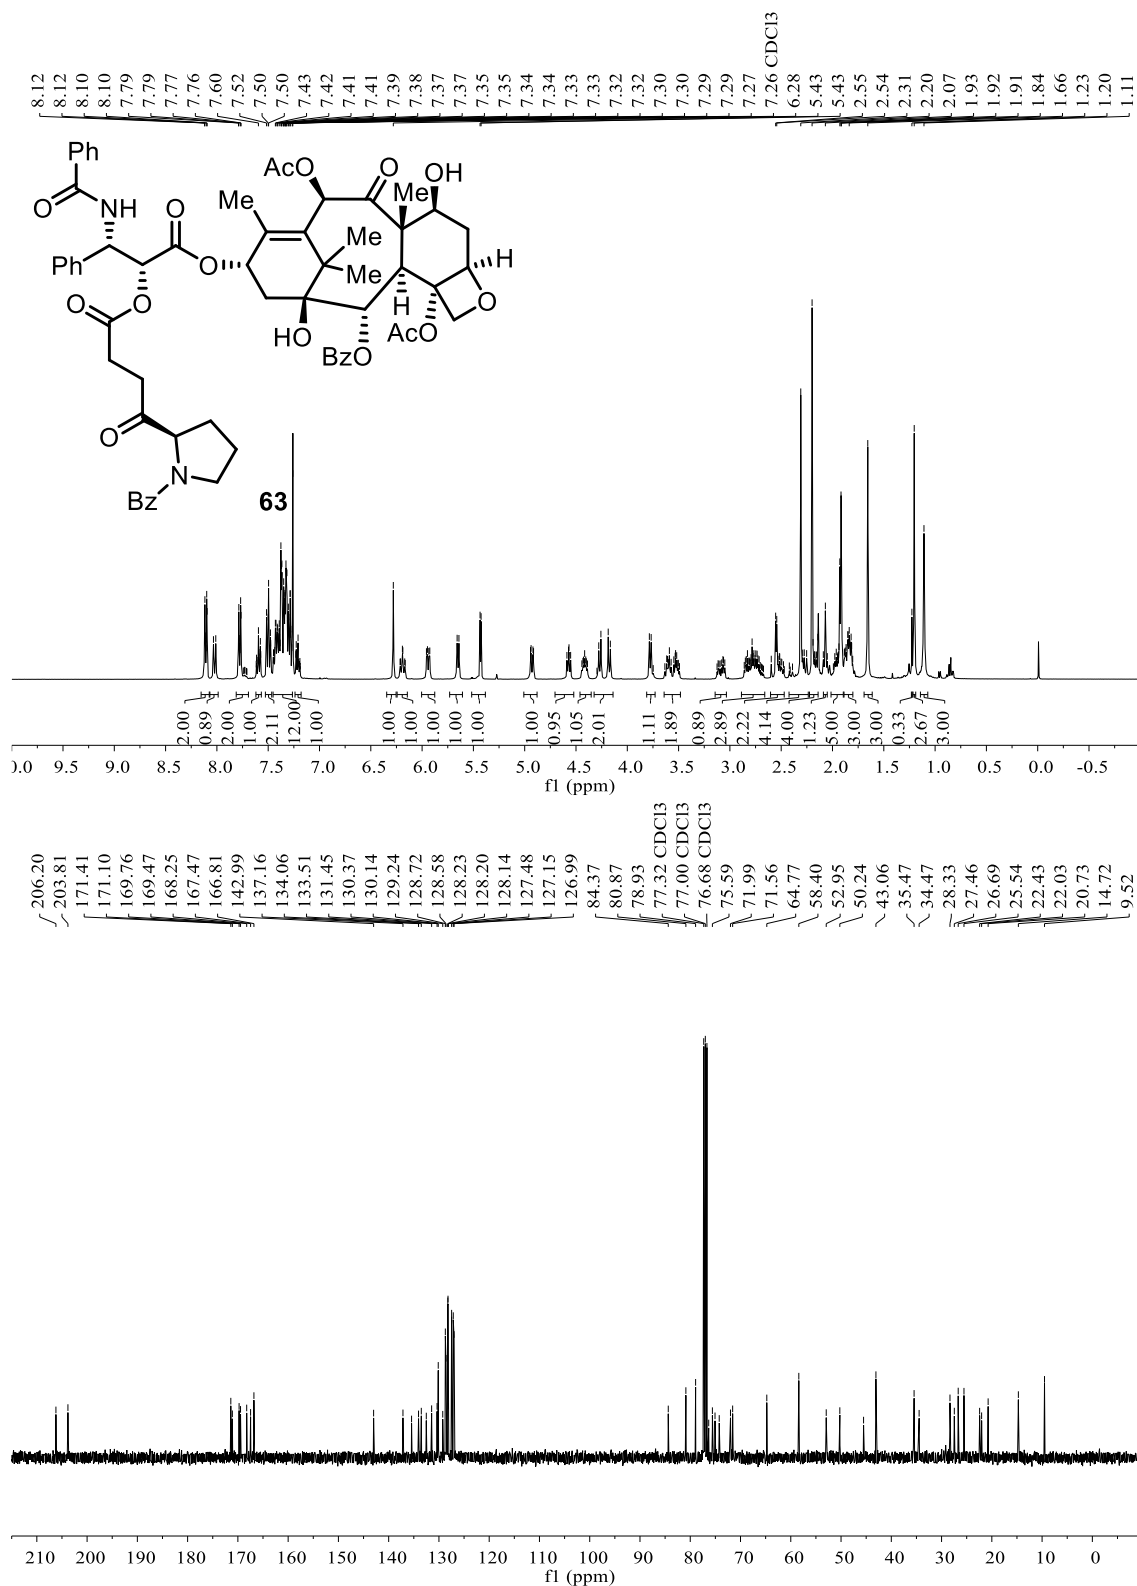

**Supplementary Fig. 69** <sup>1</sup>H NMR (400 MHz, CDCl<sub>3</sub>) and <sup>13</sup>C NMR (101 MHz, CDCl<sub>3</sub>) spectrum of 63.







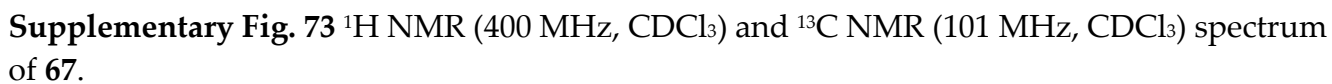

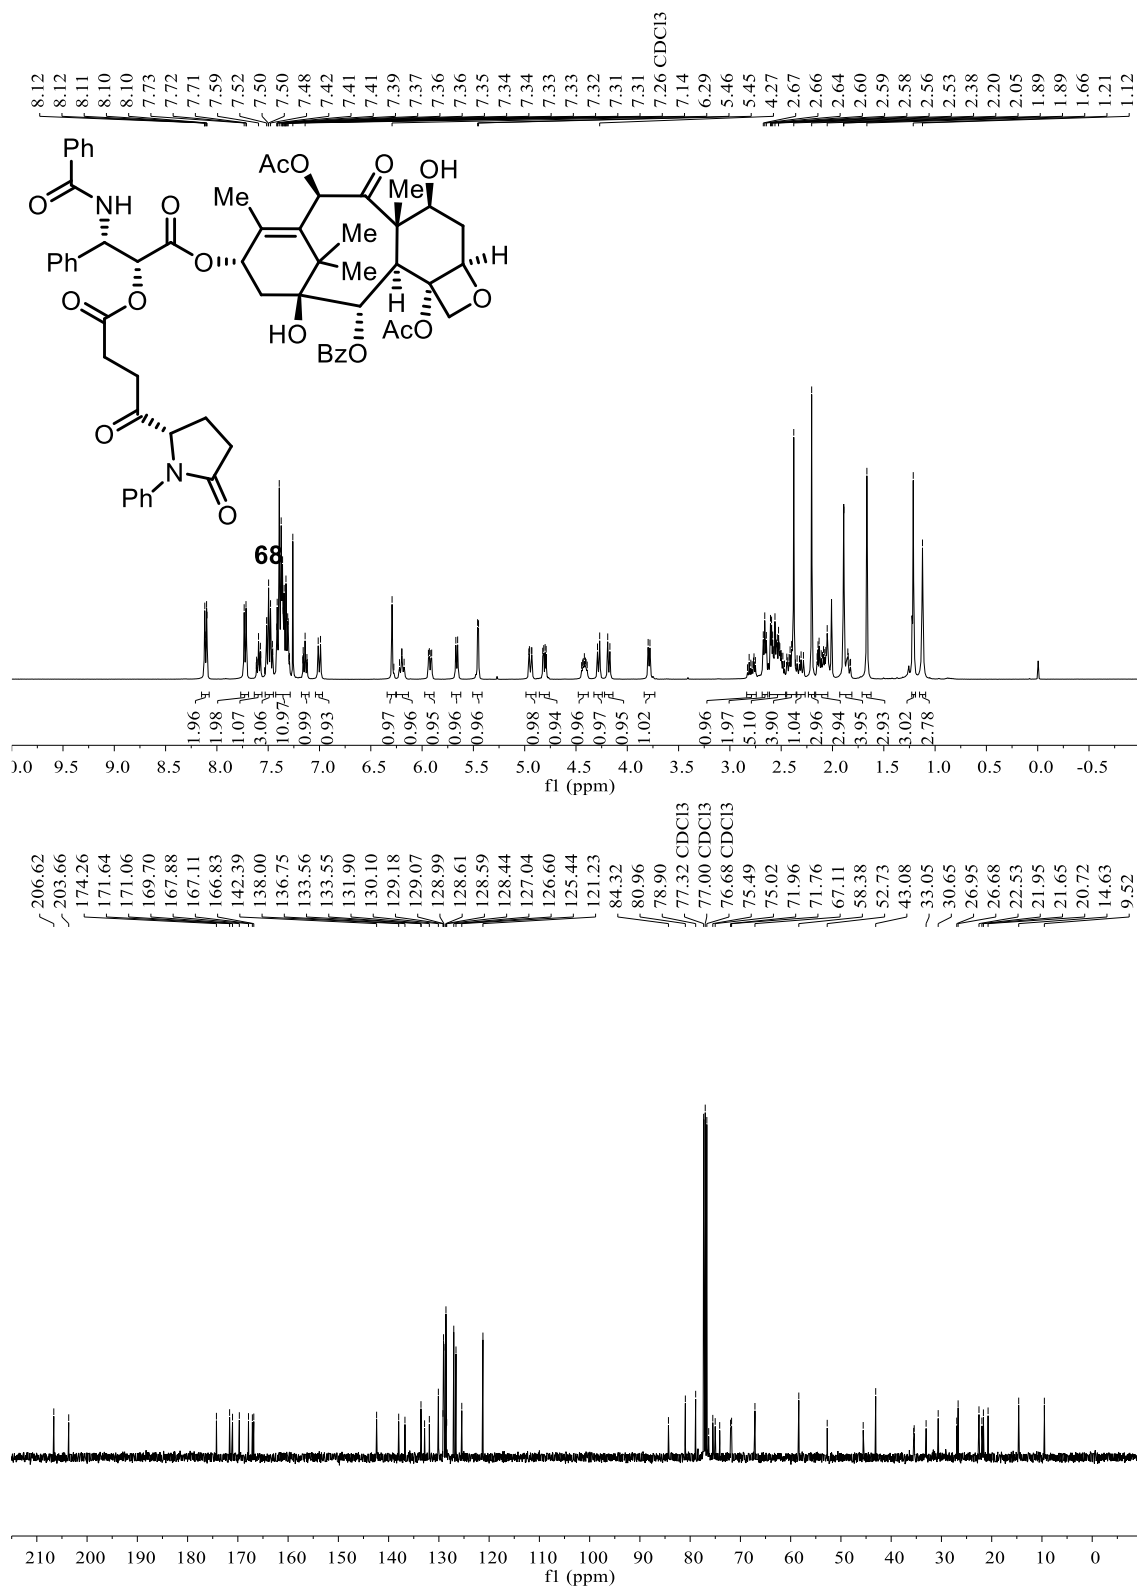

**Supplementary Fig. 74** <sup>1</sup>H NMR (400 MHz, CDCl<sub>3</sub>) and <sup>13</sup>C NMR (101 MHz, CDCl<sub>3</sub>) spectrum of 68.

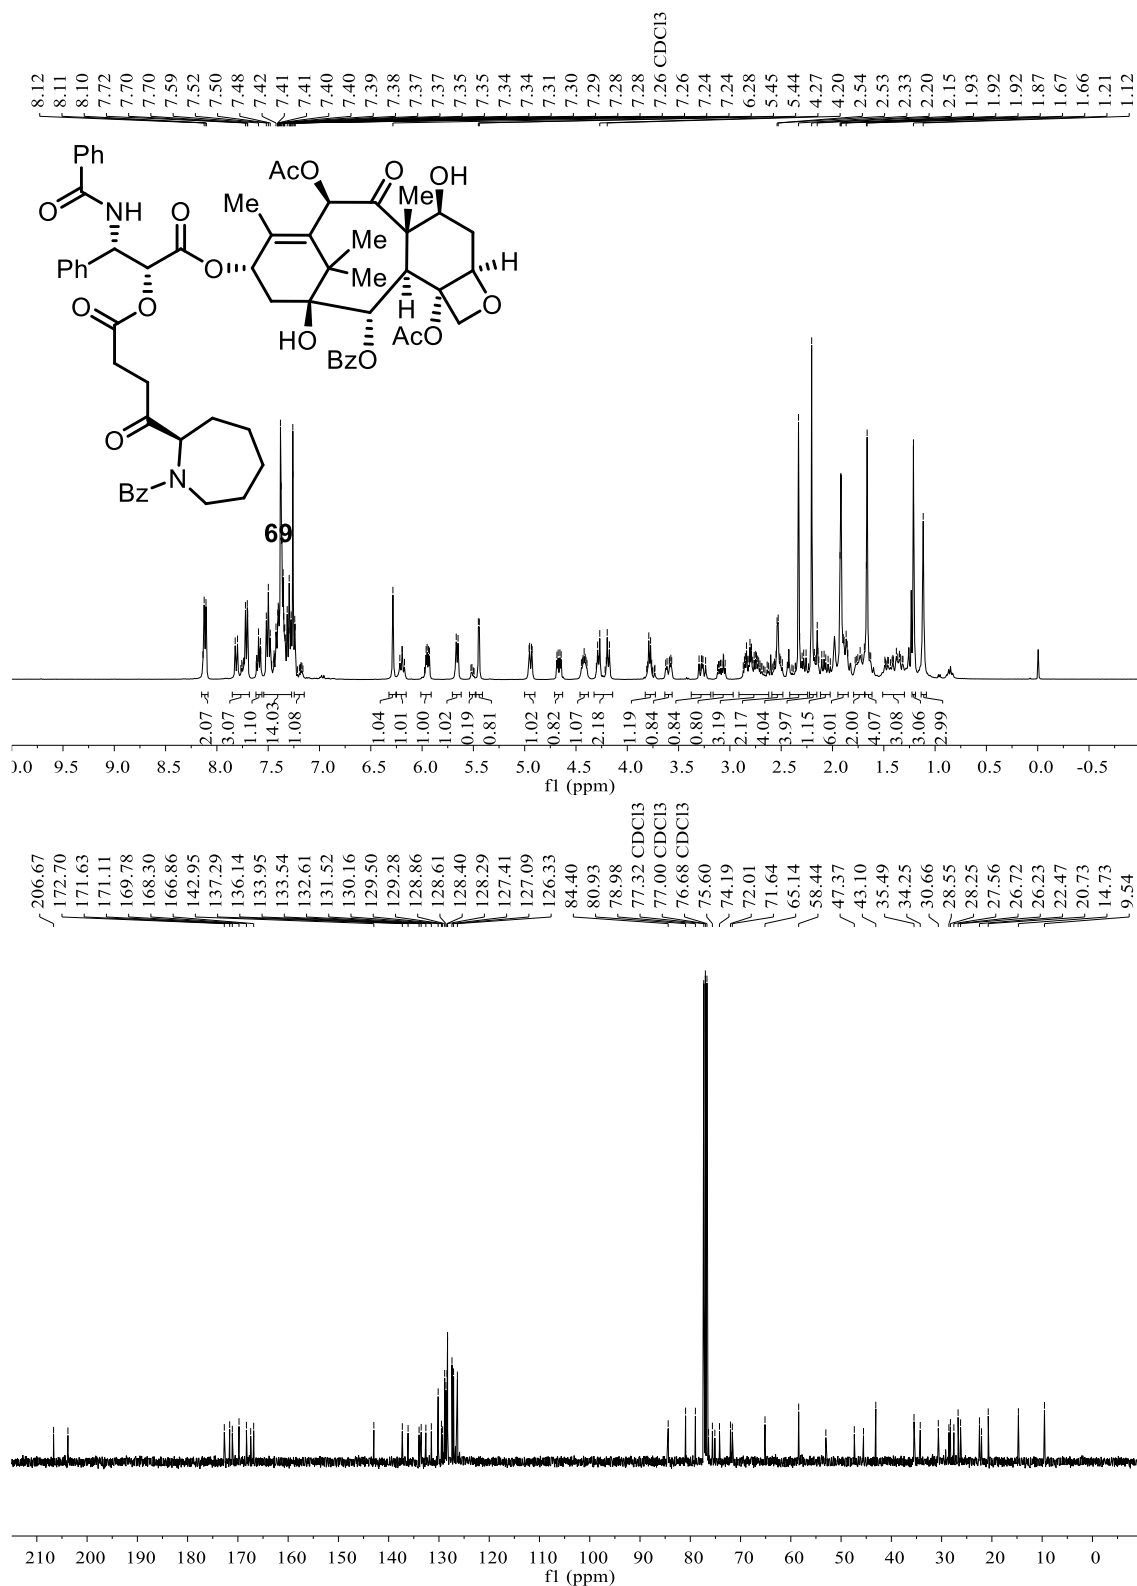

**Supplementary Fig. 75** <sup>1</sup>H NMR (400 MHz, CDCl<sub>3</sub>) and <sup>13</sup>C NMR (101 MHz, CDCl<sub>3</sub>) spectrum of 69.

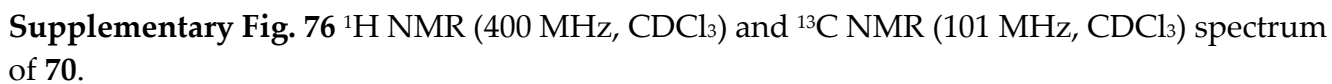

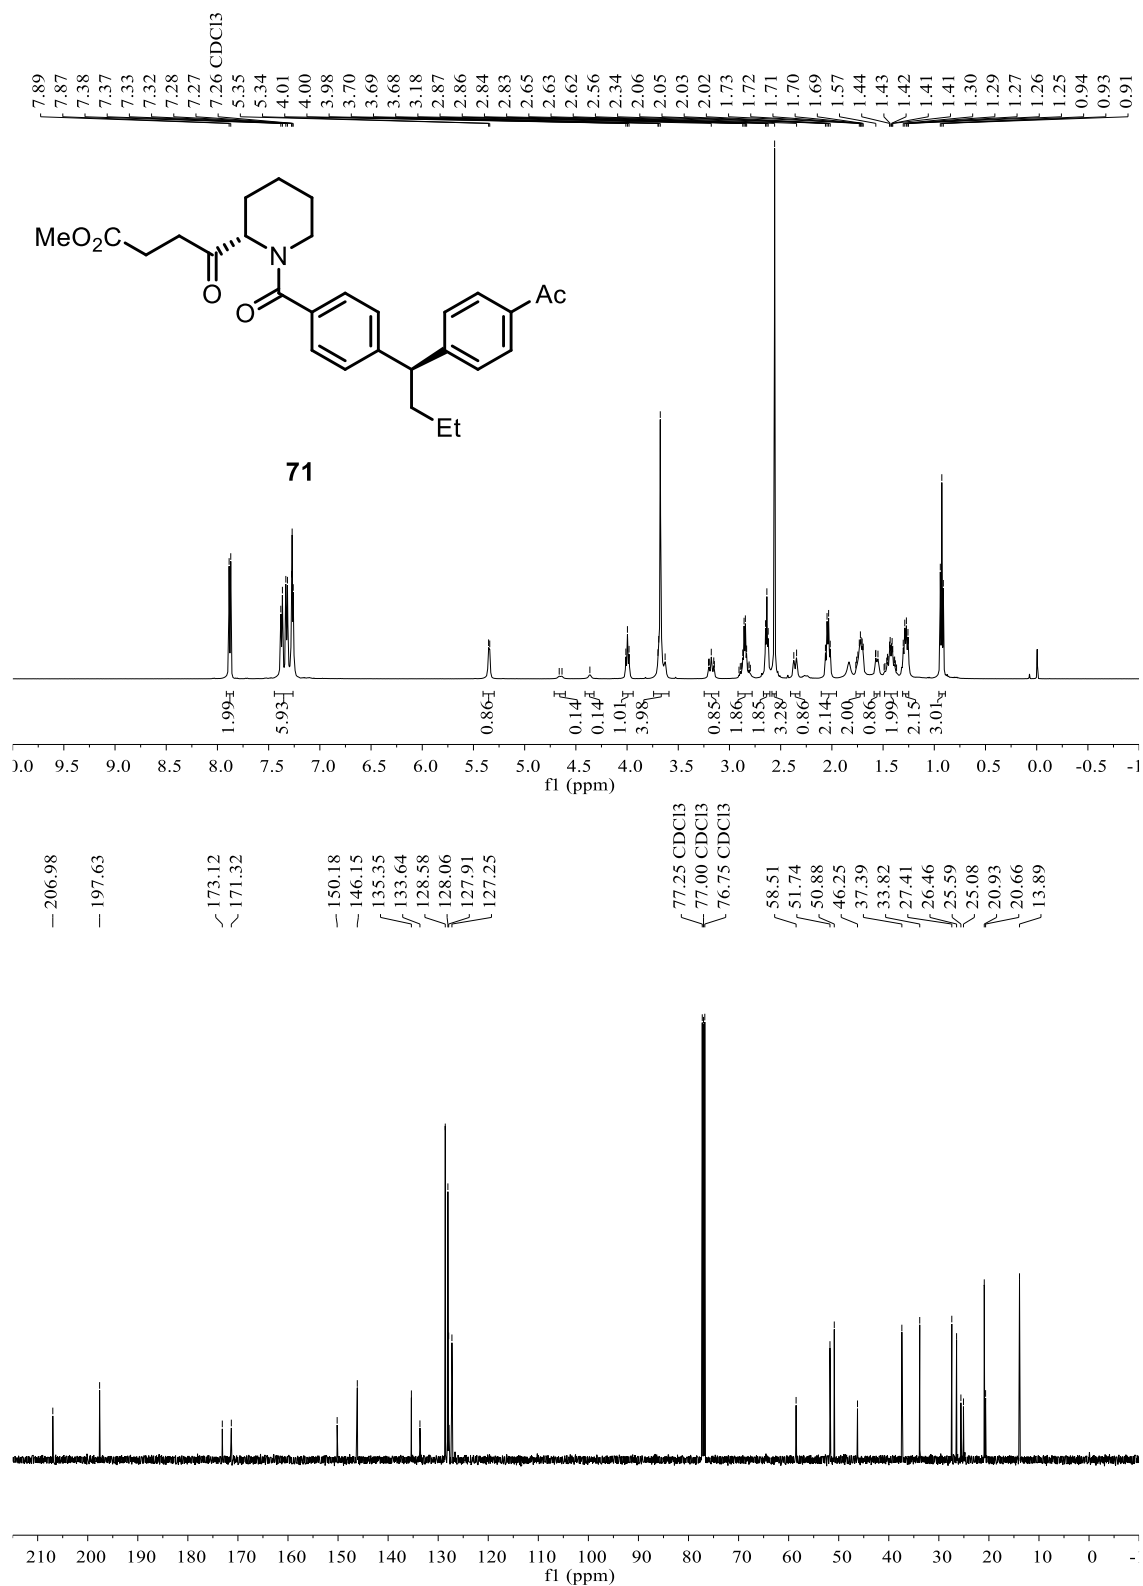

**Supplementary Fig. 77**  $^1\text{H}$  NMR (500 MHz,  $\text{CDCl}_3$ ) and  $^{13}\text{C}$  NMR (126 MHz,  $\text{CDCl}_3$ ) spectrum of **71**.

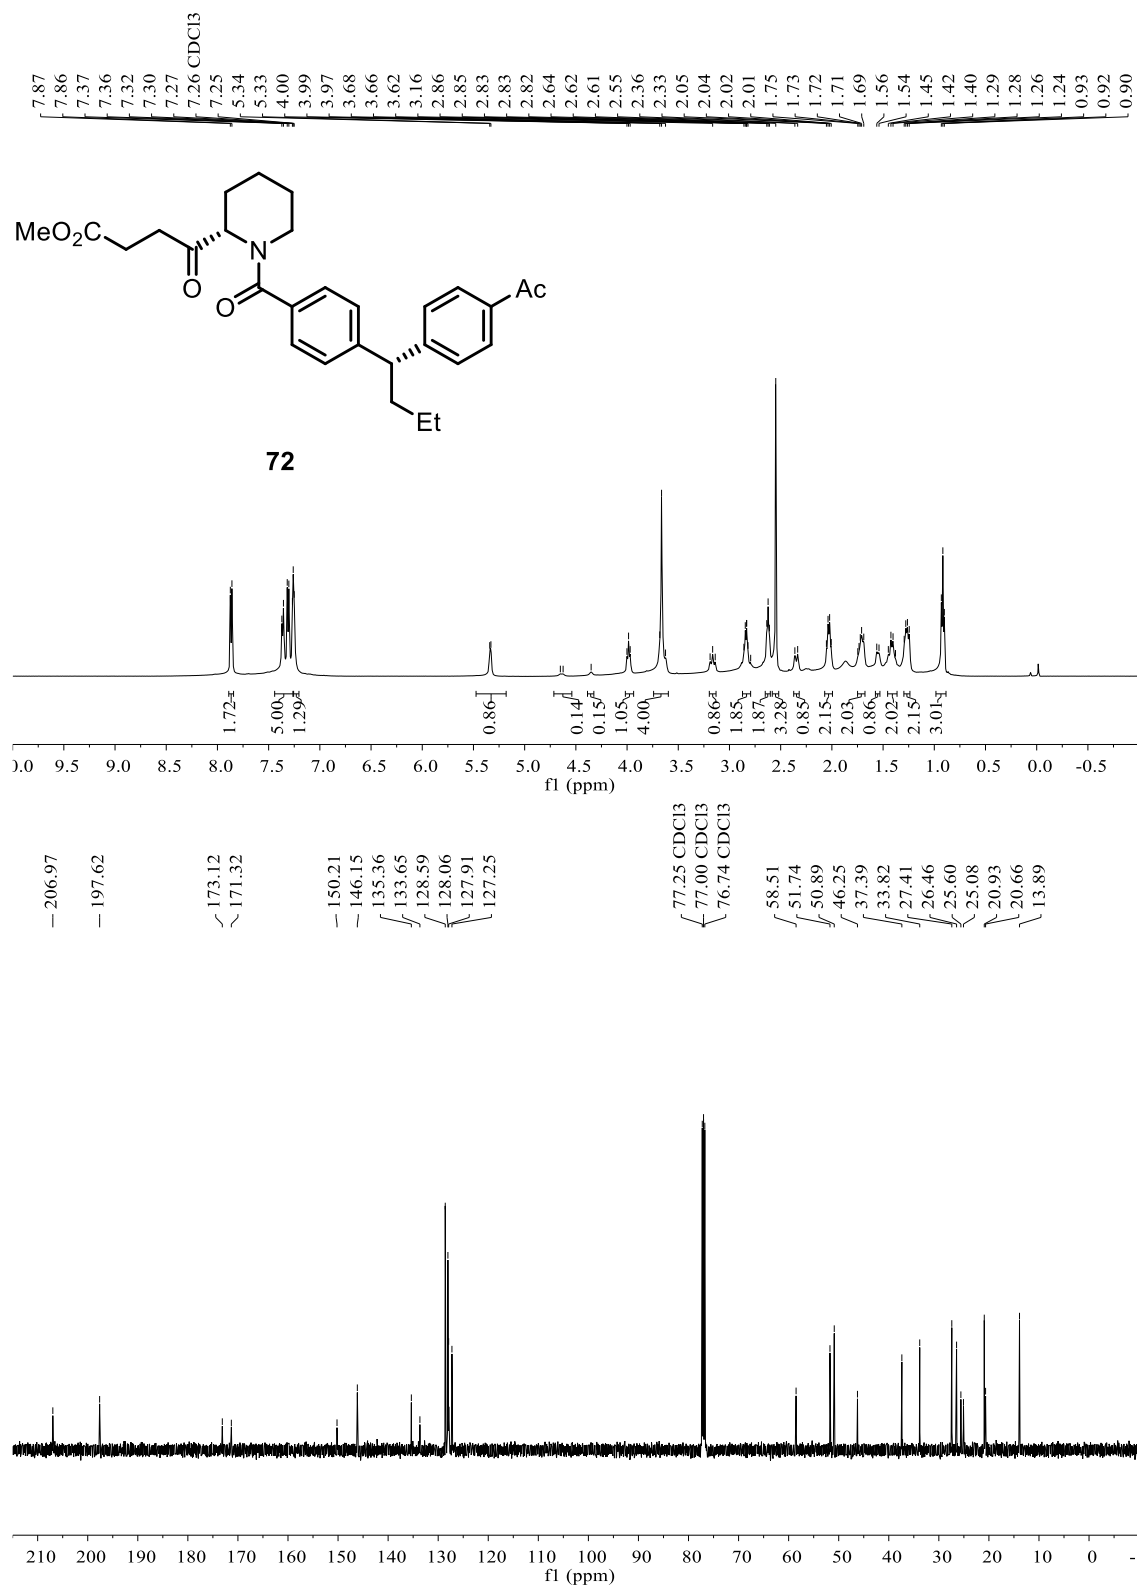

**Supplementary Fig. 78**  $^1\text{H}$  NMR (500 MHz,  $\text{CDCl}_3$ ) and  $^{13}\text{C}$  NMR (126 MHz,  $\text{CDCl}_3$ ) spectrum of **72**.

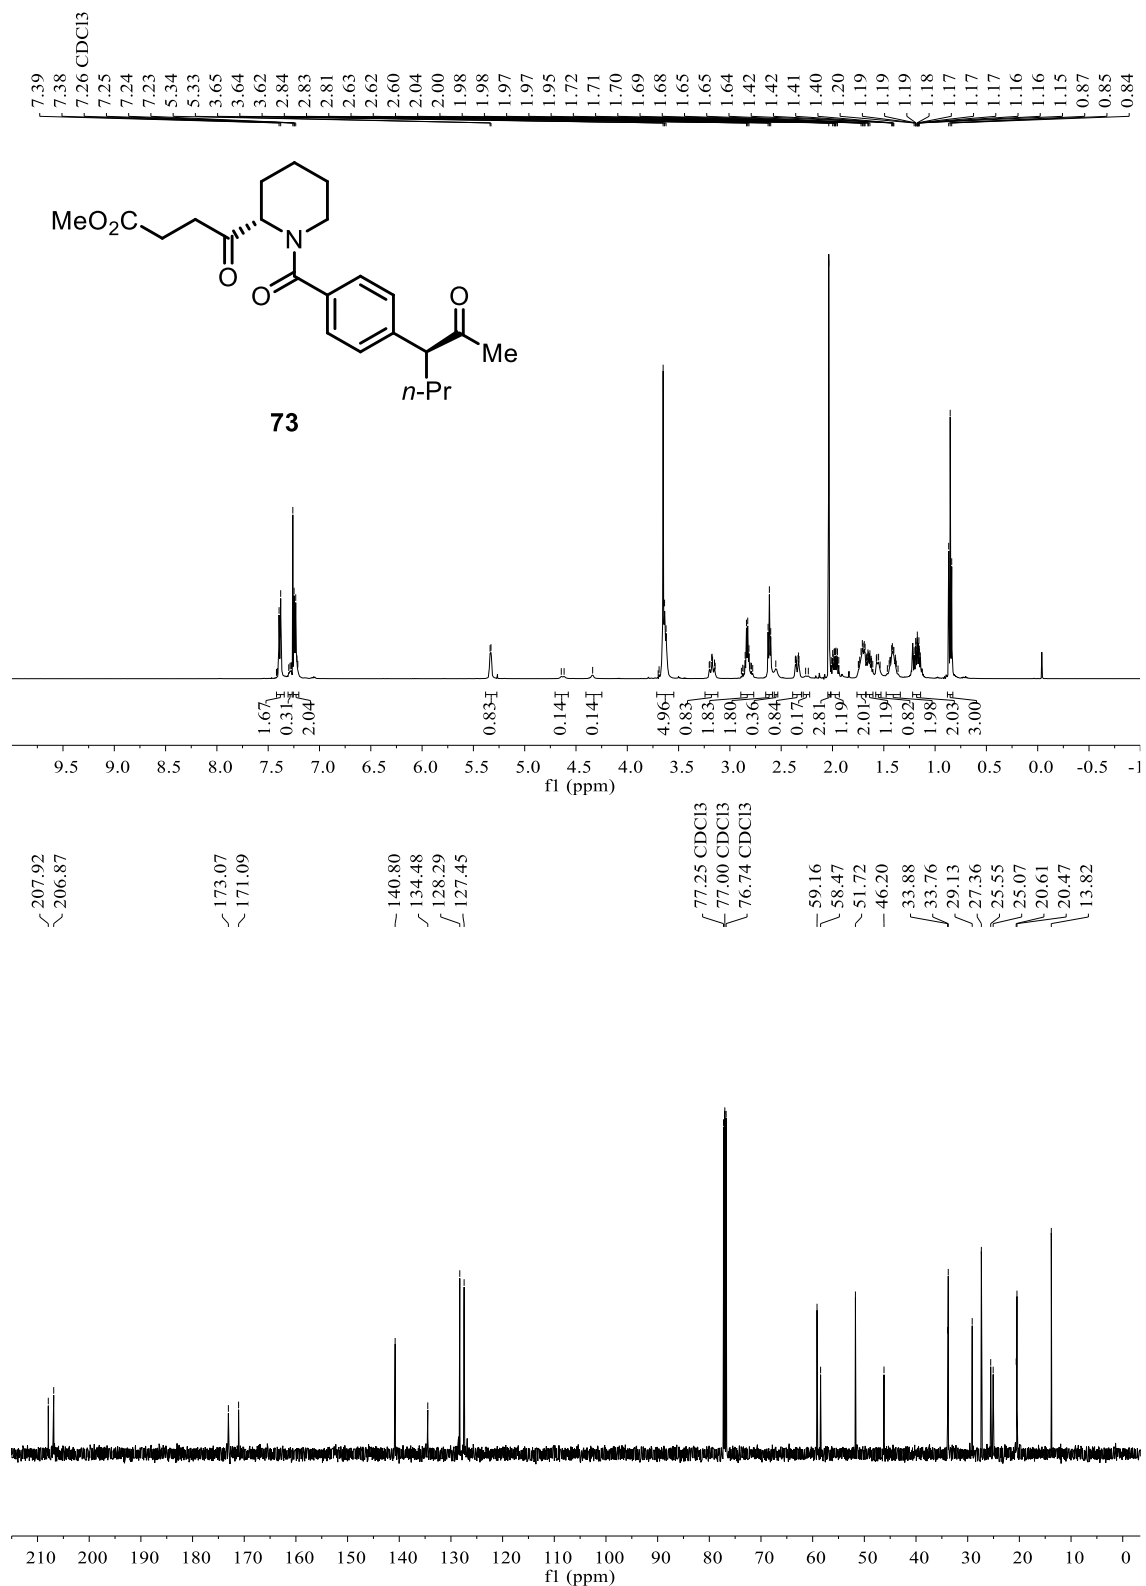

**Supplementary Fig. 79**  $^1\text{H}$  NMR (500 MHz,  $\text{CDCl}_3$ ) and  $^{13}\text{C}$  NMR (126 MHz,  $\text{CDCl}_3$ ) spectrum of **73**.

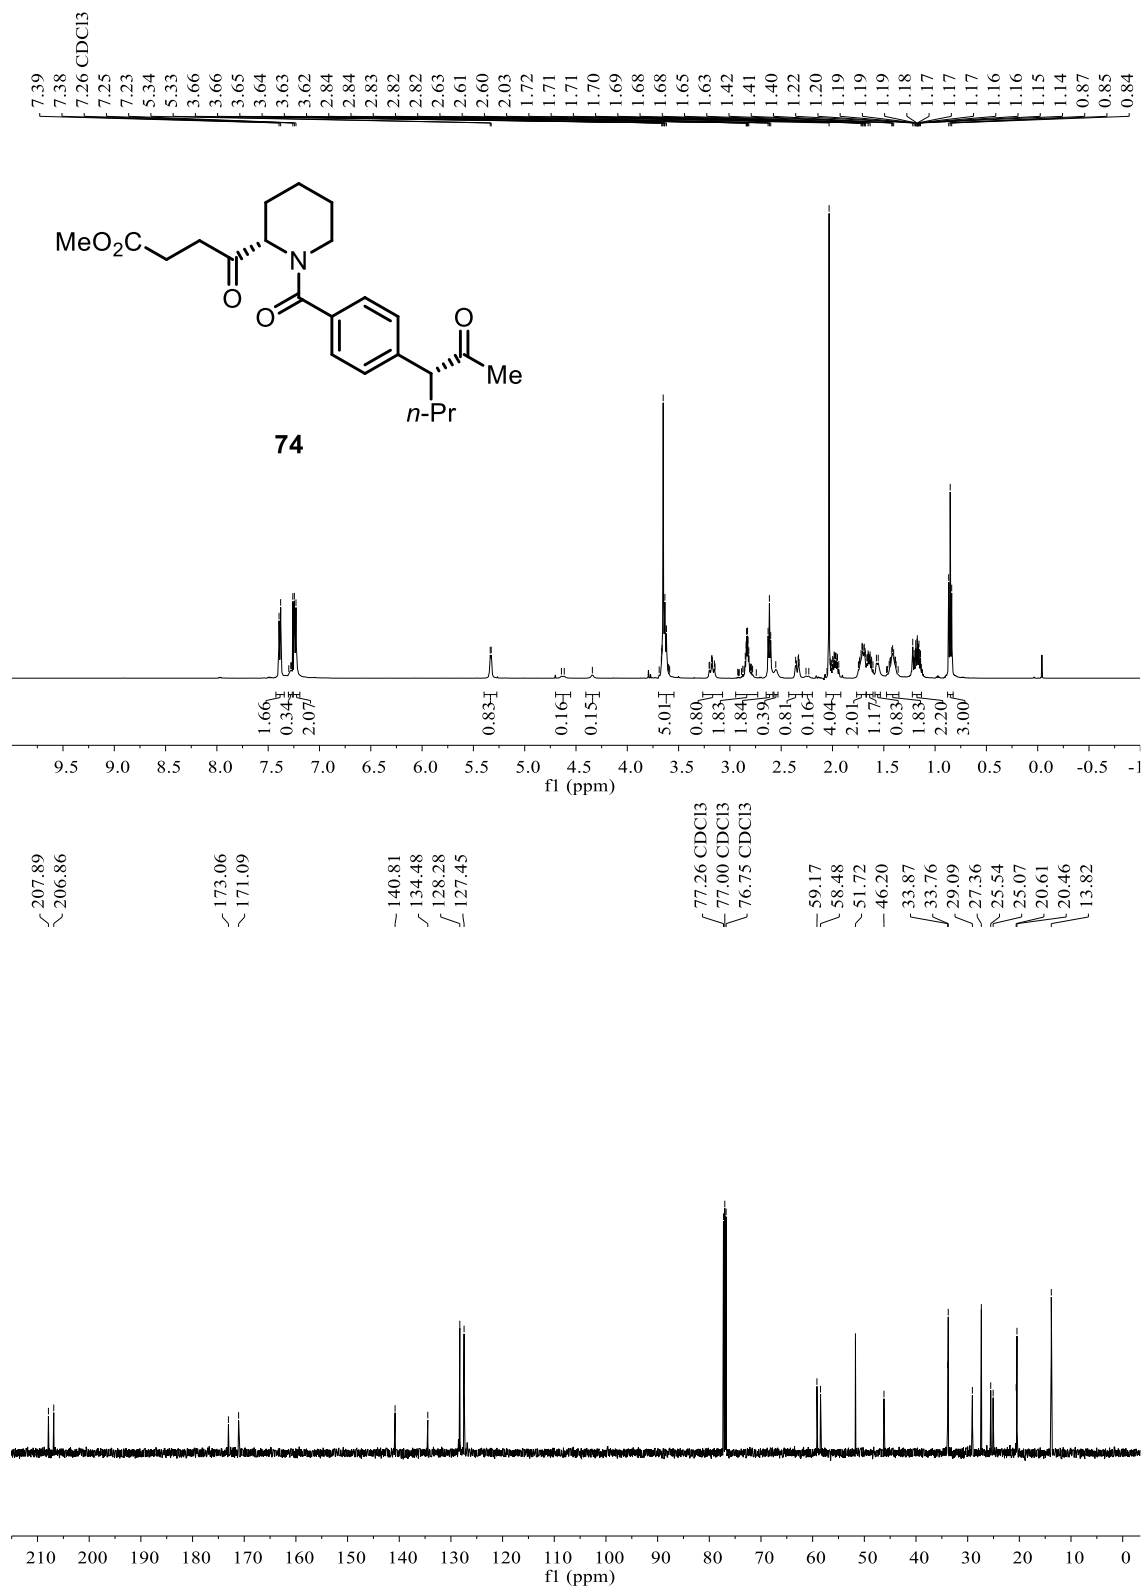

**Supplementary Fig. 80**  $^1\text{H}$  NMR (500 MHz,  $\text{CDCl}_3$ ) and  $^{13}\text{C}$  NMR (126 MHz,  $\text{CDCl}_3$ ) spectrum of **74**.

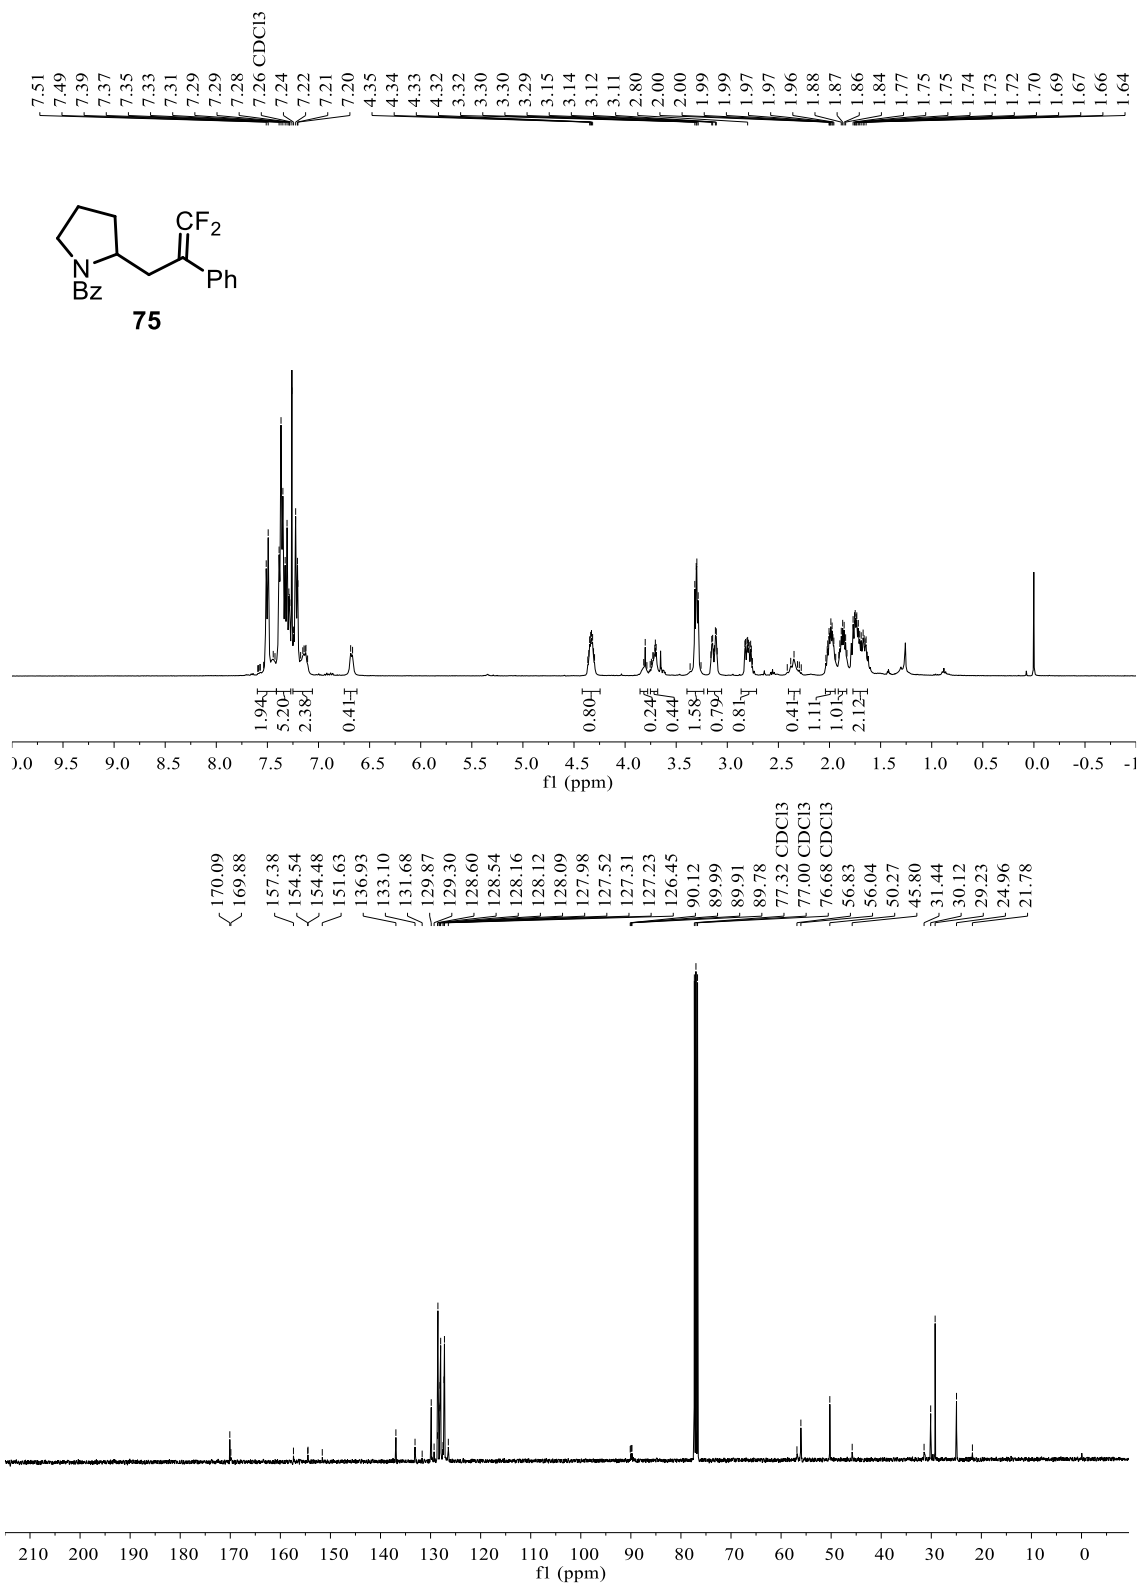

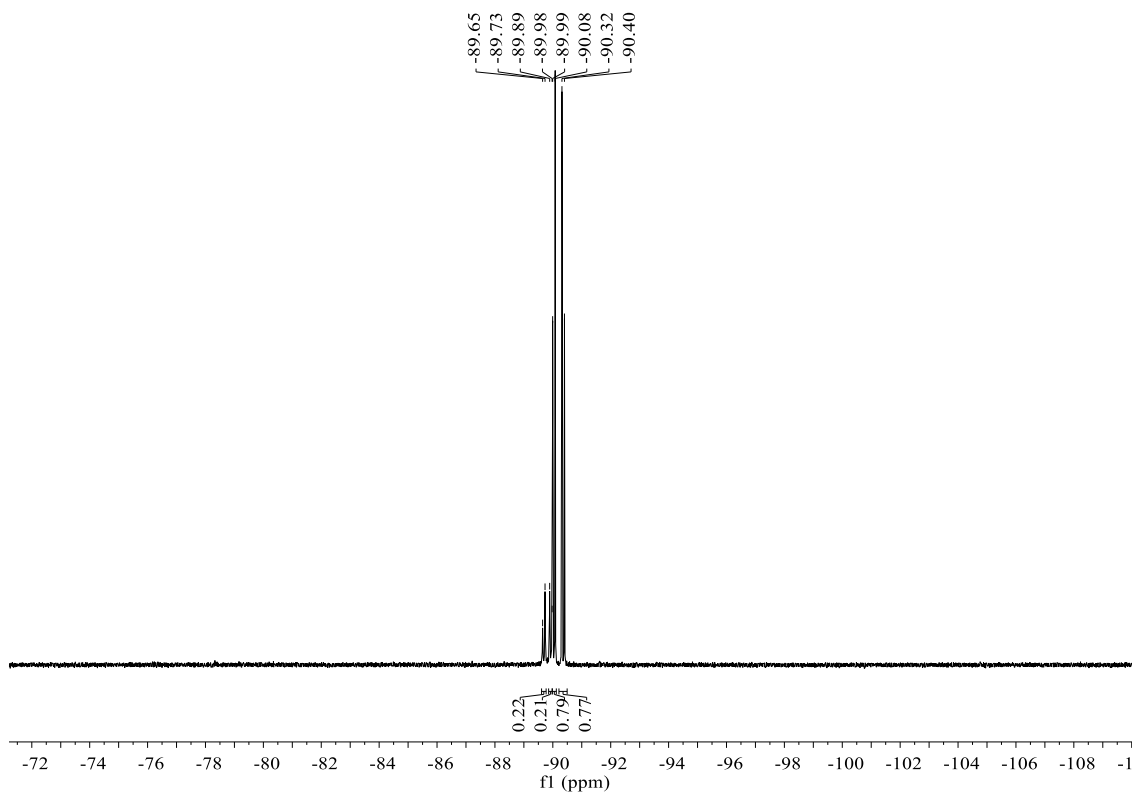

**Supplementary Fig. 81** <sup>1</sup>H NMR (400 MHz, CDCl<sub>3</sub>), <sup>13</sup>C NMR (101 MHz, CDCl<sub>3</sub>) and <sup>19</sup>F NMR (471 MHz, CDCl<sub>3</sub>) spectrum of **75**.

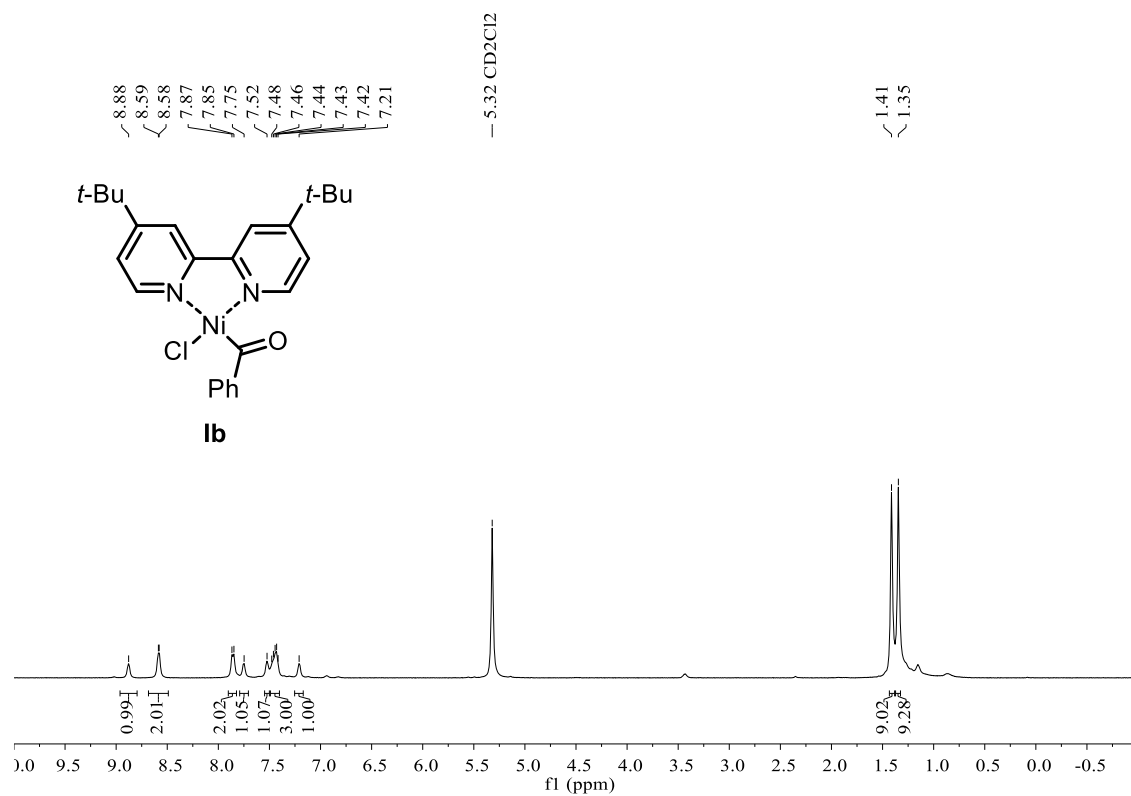

**Supplementary Fig. 82** <sup>1</sup>H NMR (500 MHz, CD<sub>2</sub>Cl<sub>2</sub>) spectrum of **Ib**.

## 1.9 Stereoselectivity Analysis

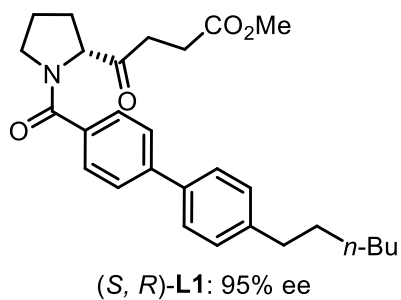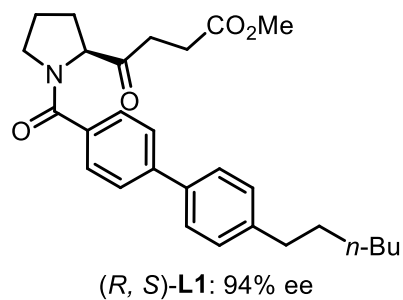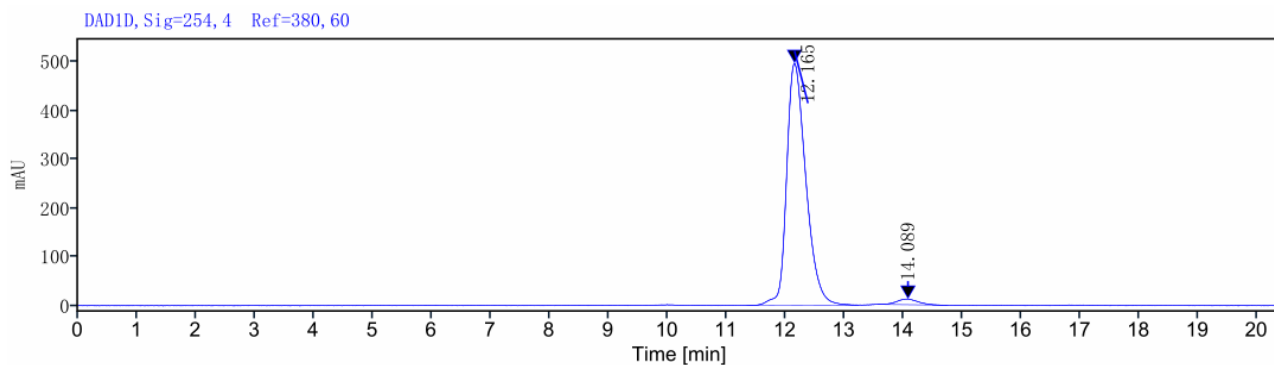

Signal: DAD1D, Sig=254, 4 Ref=380, 60

| RetTime [min] | Type | Width [min] | Area [mAU*s] | Height [mAU] | Area %  |
|---------------|------|-------------|--------------|--------------|---------|
| 12.165        | MM m | 1.90471     | 11237.85680  | 496.80463    | 97.5217 |
| 14.089        | MM m | 1.19044     | 285.58194    | 11.88619     | 2.4783  |
| Totals        |      |             | 11523.43874  |              |         |

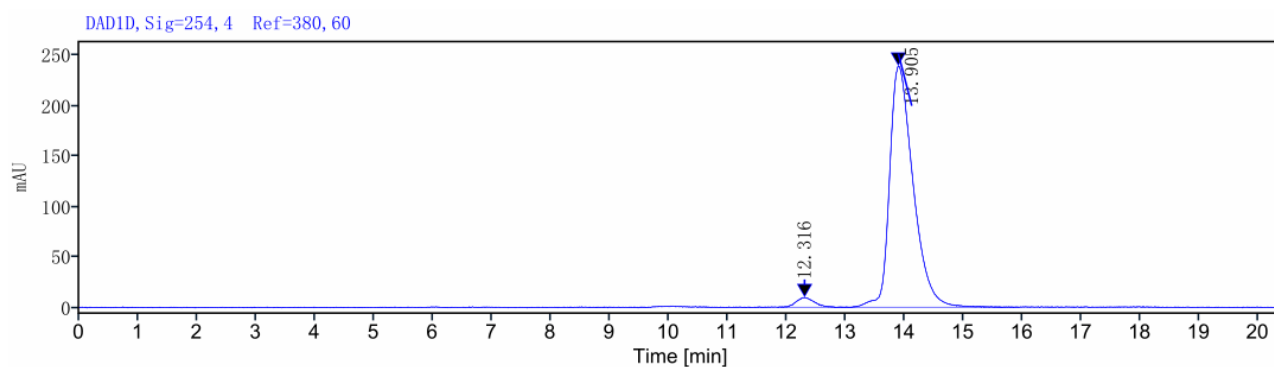

Signal: DAD1D, Sig=254, 4 Ref=380, 60

| RetTime [min] | Type | Width [min] | Area [mAU*s] | Height [mAU] | Area %  |
|---------------|------|-------------|--------------|--------------|---------|
| 12.316        | MM m | 0.87302     | 199.20733    | 9.83313      | 2.9154  |
| 13.905        | MM m | 3.17460     | 6633.72606   | 239.74617    | 97.0846 |
| Totals        |      |             | 6832.93339   |              |         |

Supplementary Fig. 83 HPLC data of 3a.

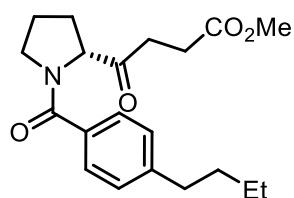

(S, R)-L1: 96% ee

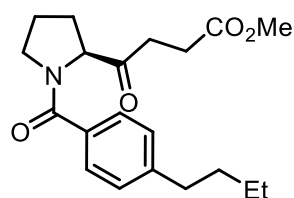

(R, S)-L1: 95% ee

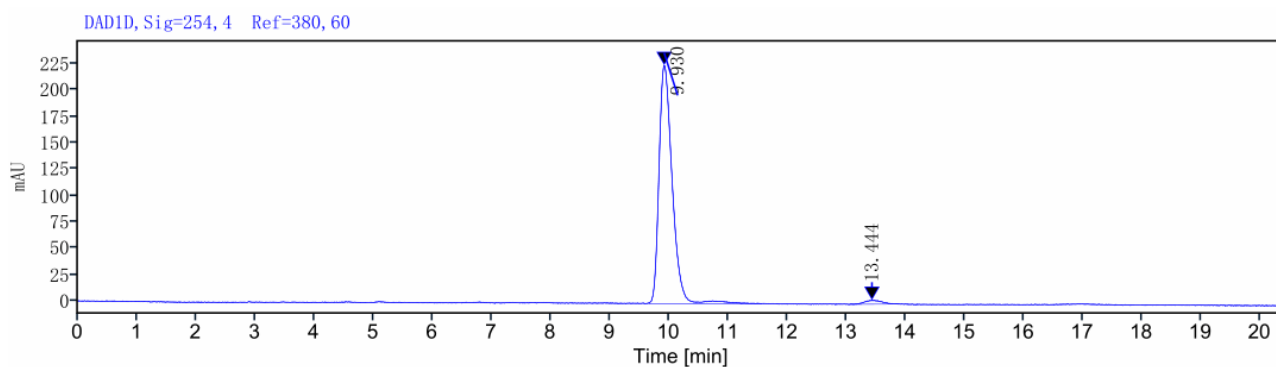

**Signal:** DAD1D, Sig=254, 4 Ref=380, 60

| RetTime<br>[min] | Type | Width<br>[min] | Area<br>[mAU*s] | Height<br>[mAU] | Area<br>% |
|------------------|------|----------------|-----------------|-----------------|-----------|
| 9.930            | VM m | 1.90198        | 3511.80761      | 226.63921       | 97.9172   |
| 13.444           | MM m | 0.82254        | 74.70115        | 3.98812         | 2.0828    |
| Totals           |      |                | 3586.50875      |                 |           |

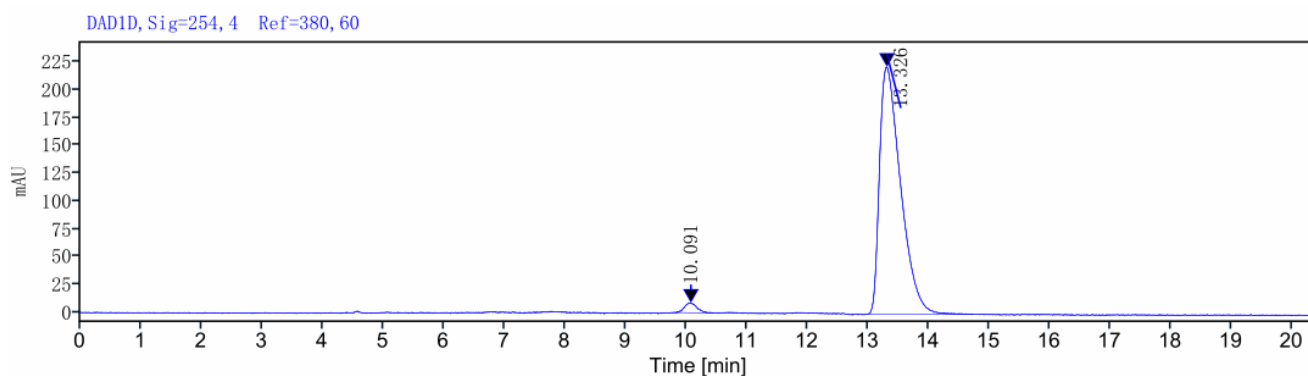

**Signal:** DAD1D, Sig=254, 4 Ref=380, 60

| RetTime<br>[min] | Type | Width<br>[min] | Area<br>[mAU*s] | Height<br>[mAU] | Area<br>% |
|------------------|------|----------------|-----------------|-----------------|-----------|
| 10.091           | MM m | 0.64995        | 129.41212       | 8.96702         | 2.3581    |
| 13.326           | MM m | 1.72574        | 5358.55727      | 222.09704       | 97.6419   |
| Totals           |      |                | 5487.96939      |                 |           |

Supplementary Fig. 84 HPLC data of 4.

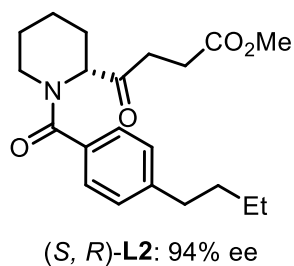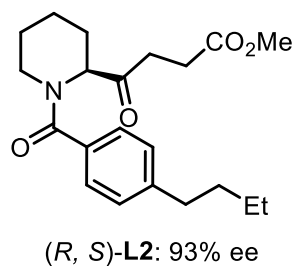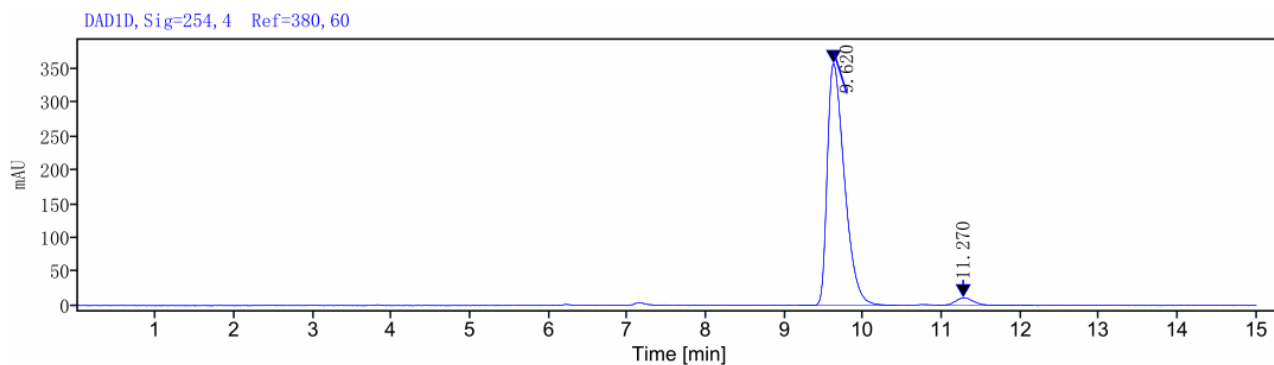

**Signal:** DAD1D, Sig=254, 4 Ref=380, 60

| RetTime [min] | Type | Width [min] | Area [mAU*s] | Height [mAU] | Area %  |
|---------------|------|-------------|--------------|--------------|---------|
| 9.620         | MM m | 1.25666     | 5424.61431   | 358.34073    | 97.0091 |
| 11.270        | MM m | 1.21097     | 167.24429    | 11.28308     | 2.9909  |
| Totals        |      |             | 5591.85860   |              |         |

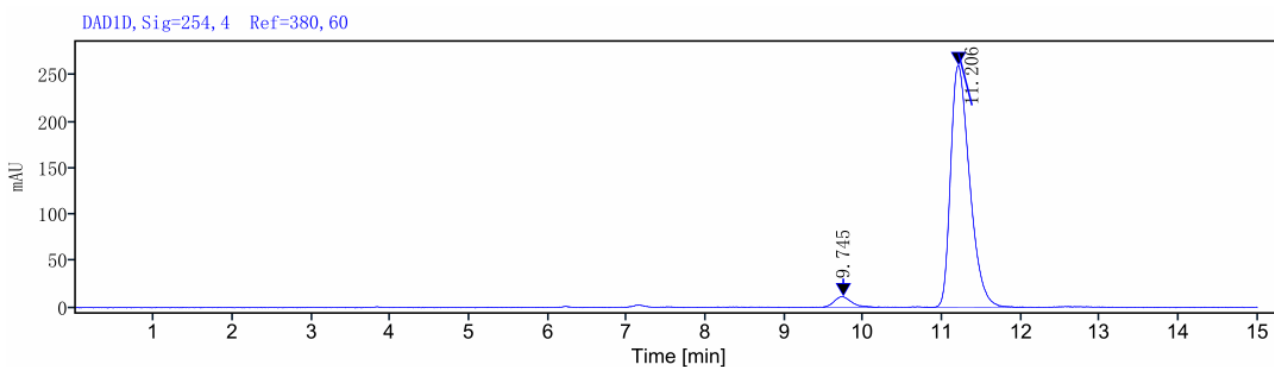

**Signal:** DAD1D, Sig=254, 4 Ref=380, 60

| RetTime [min] | Type | Width [min] | Area [mAU*s] | Height [mAU] | Area %  |
|---------------|------|-------------|--------------|--------------|---------|
| 9.745         | MM m | 0.71969     | 166.96413    | 11.52825     | 3.6859  |
| 11.206        | MM m | 1.26802     | 4362.79822   | 260.46774    | 96.3141 |
| Totals        |      |             | 4529.76235   |              |         |

Supplementary Fig. 85 HPLC data of 5.

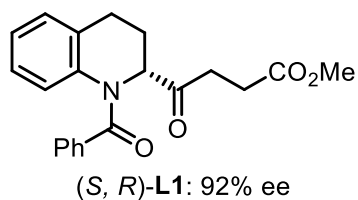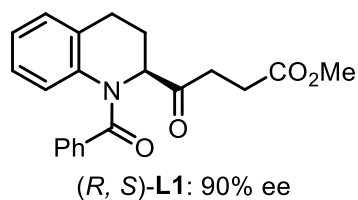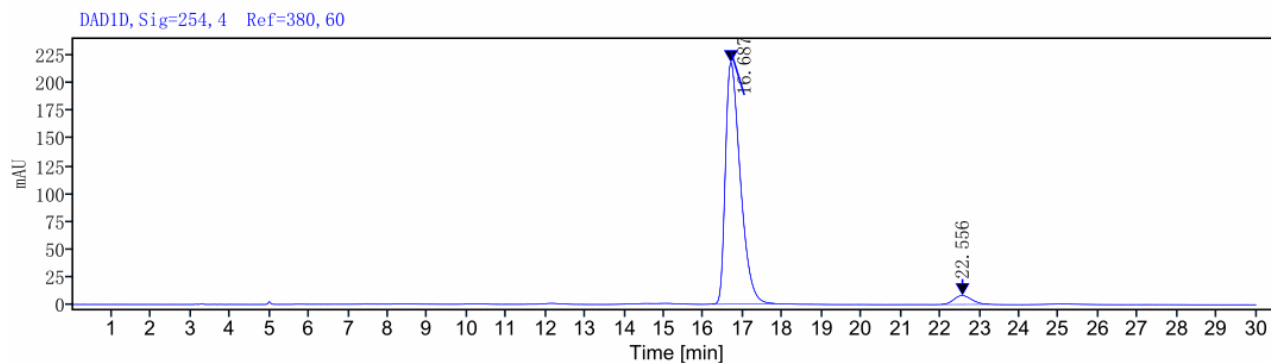

**Signal:** DAD1D, Sig=254, 4 Ref=380, 60

| RetTime<br>[min] | Type | Width<br>[min] | Area<br>[mAU*s] | Height<br>[mAU] | Area<br>% |
|------------------|------|----------------|-----------------|-----------------|-----------|
| 16.687           | VV   | 1.58608        | 5756.94178      | 219.22308       | 95.7772   |
| 22.556           | VM m | 1.19427        | 253.82010       | 8.11515         | 4.2228    |
| Totals           |      |                | 6010.76188      |                 |           |

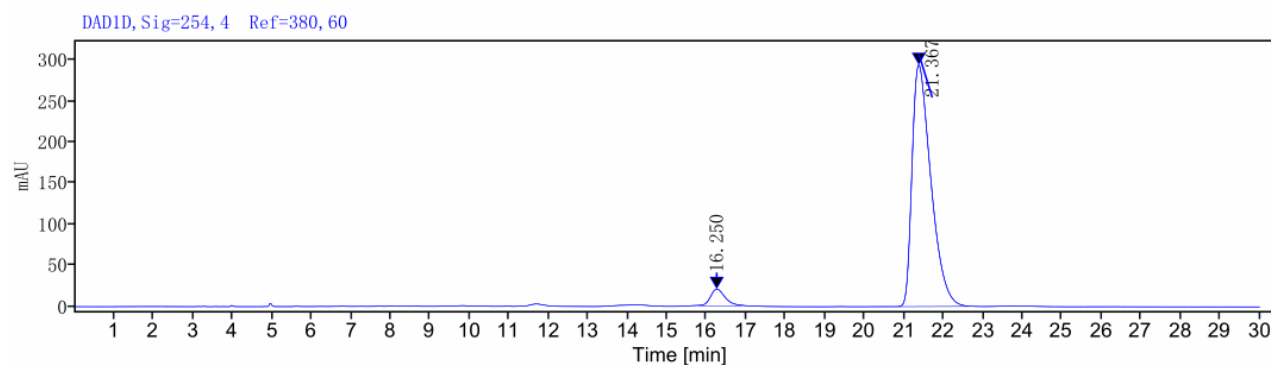

**Signal:** DAD1D, Sig=254, 4 Ref=380, 60

| RetTime<br>[min] | Type | Width<br>[min] | Area<br>[mAU*s] | Height<br>[mAU] | Area<br>% |
|------------------|------|----------------|-----------------|-----------------|-----------|
| 16.250           | VV   | 1.06499        | 522.20974       | 20.34943        | 5.0856    |
| 21.367           | VV   | 1.78230        | 9746.09313      | 294.01410       | 94.9144   |
| Totals           |      |                | 10268.30288     |                 |           |

Supplementary Fig. 86 HPLC data of 6.

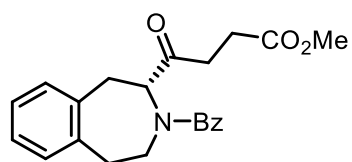

(*S, R*)-L1: 81% ee

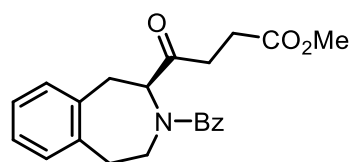

(*R, S*)-L1: 78% ee

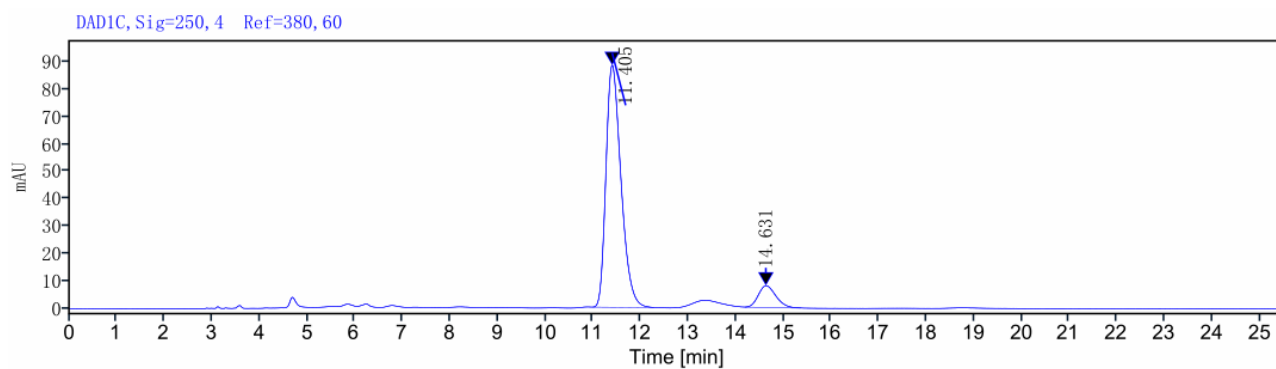

**Signal:** DAD1C, Sig=250, 4 Ref=380, 60

| RetTime [min] | Type | Width [min] | Area [mAU*s] | Height [mAU] | Area %  |
|---------------|------|-------------|--------------|--------------|---------|
| 11.405        | VV   | 1.27050     | 1939.73961   | 88.39925     | 90.4782 |
| 14.631        | BV   | 1.17109     | 204.13621    | 7.97735      | 9.5218  |
| Totals        |      |             | 2143.87582   |              |         |

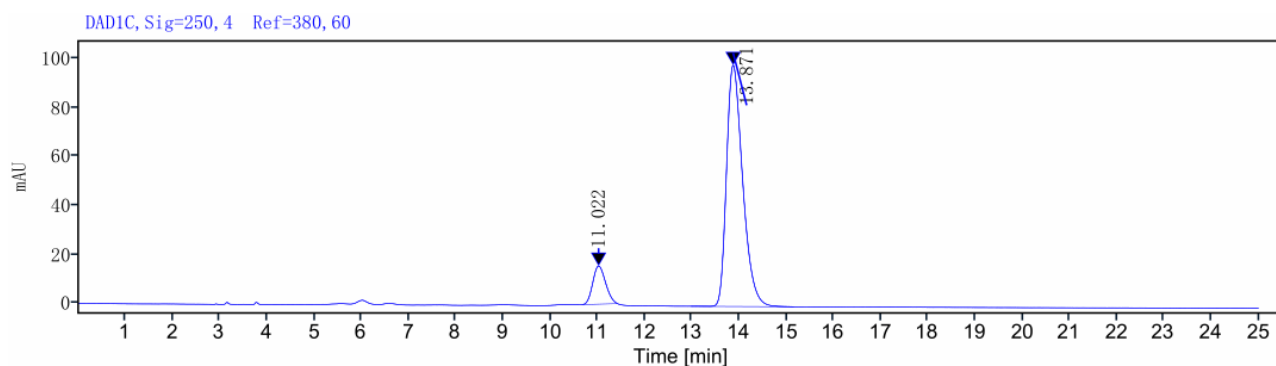

**Signal:** DAD1C, Sig=250, 4 Ref=380, 60

| RetTime [min] | Type | Width [min] | Area [mAU*s] | Height [mAU] | Area %  |
|---------------|------|-------------|--------------|--------------|---------|
| 11.022        | MM m | 0.73879     | 295.12774    | 15.65912     | 11.1431 |
| 13.871        | MM m | 2.17645     | 2353.38942   | 98.96361     | 88.8569 |
| Totals        |      |             | 2648.51716   |              |         |

Supplementary Fig. 87 HPLC data of 7.

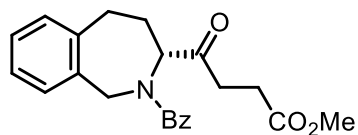

(*S, R*)-L1: 84% ee

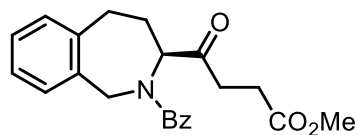

(*R, S*)-L1: 83% ee

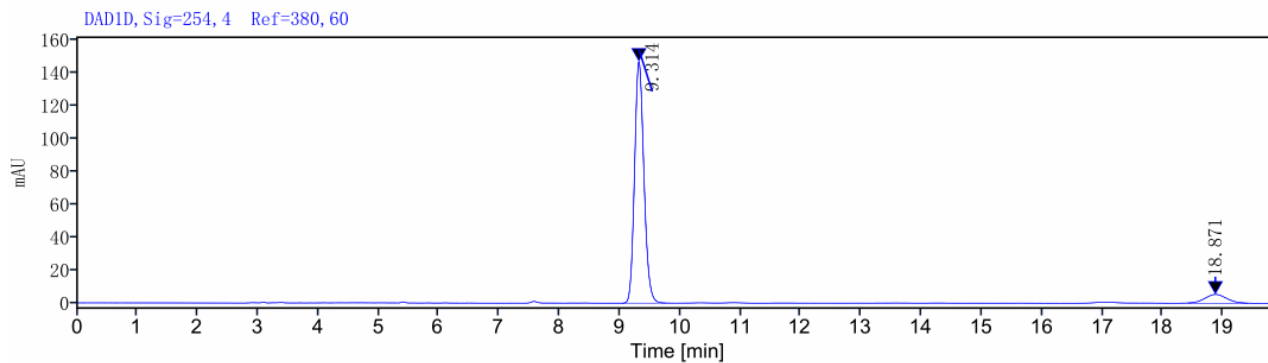

**Signal:** DAD1D, Sig=254, 4 Ref=380, 60

| RetTime [min] | Type | Width [min] | Area [mAU*s] | Height [mAU] | Area %  |
|---------------|------|-------------|--------------|--------------|---------|
| 9.314         | BV   | 0.72387     | 1582.80447   | 146.60395    | 92.1700 |
| 18.871        | VV   | 0.99039     | 134.46132    | 5.33534      | 7.8300  |
| Totals        |      |             | 1717.26579   |              |         |

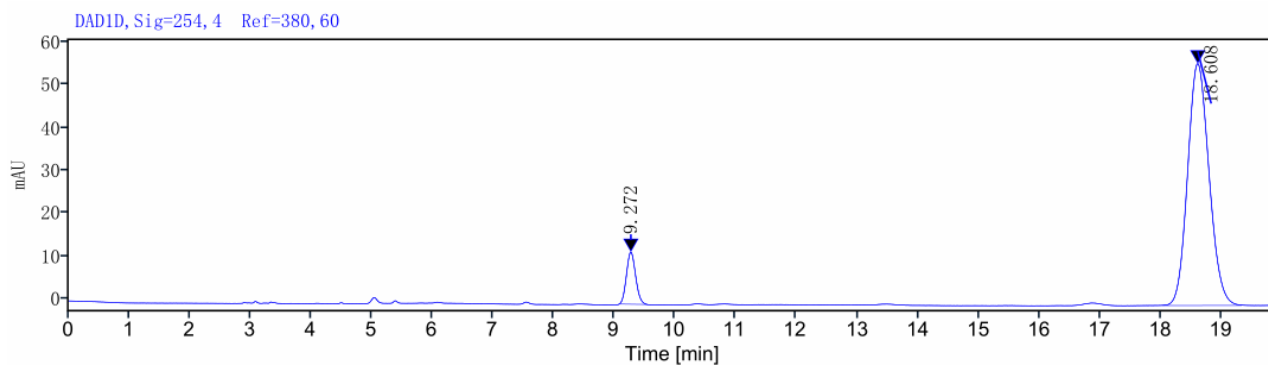

**Signal:** DAD1D, Sig=254, 4 Ref=380, 60

| RetTime [min] | Type | Width [min] | Area [mAU*s] | Height [mAU] | Area %  |
|---------------|------|-------------|--------------|--------------|---------|
| 9.272         | MM m | 0.45526     | 126.98902    | 12.12637     | 8.4354  |
| 18.608        | VV   | 1.29350     | 1378.43941   | 56.21567     | 91.5646 |
| Totals        |      |             | 1505.42843   |              |         |

Supplementary Fig. 88 HPLC data of 8.

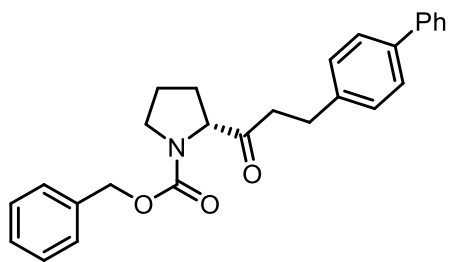

(*S, R*)-L1: 88% ee

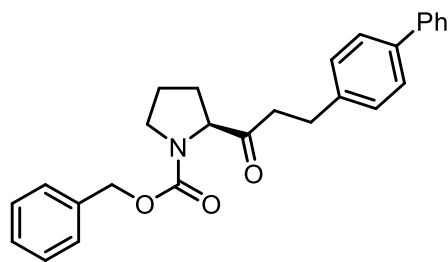

(*R, S*)-L1: 89% ee

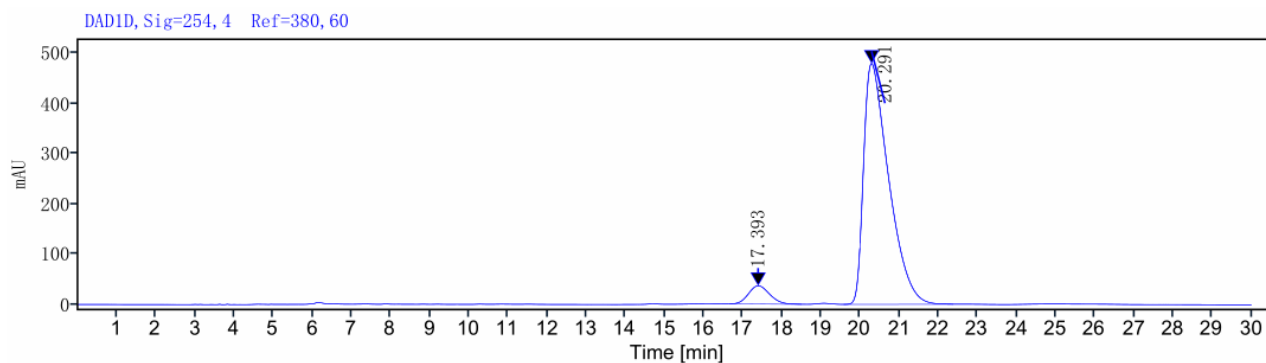

**Signal:** DAD1D, Sig=254, 4 Ref=380, 60

| RetTime [min] | Type | Width [min] | Area [mAU*s] | Height [mAU] | Area %  |
|---------------|------|-------------|--------------|--------------|---------|
| 17.393        | BV   | 1.83765     | 1362.20774   | 36.33406     | 5.9885  |
| 20.291        | BV   | 2.79345     | 21384.99775  | 479.54380    | 94.0115 |
| Totals        |      |             | 22747.20549  |              |         |

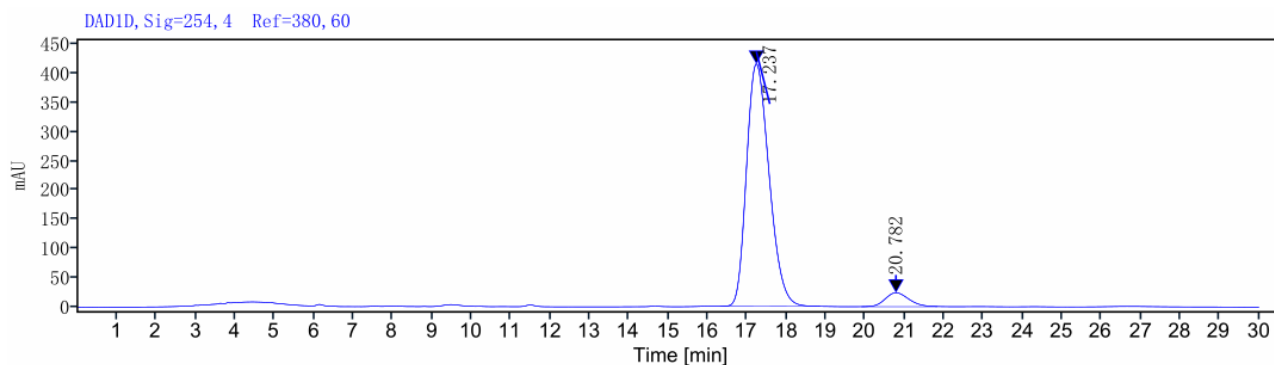

**Signal:** DAD1D, Sig=254, 4 Ref=380, 60

| RetTime [min] | Type | Width [min] | Area [mAU*s] | Height [mAU] | Area %  |
|---------------|------|-------------|--------------|--------------|---------|
| 17.237        | VV   | 2.53045     | 16577.03073  | 415.18418    | 94.2772 |
| 20.782        | VV   | 1.92823     | 1006.26169   | 23.95452     | 5.7228  |
| Totals        |      |             | 17583.29243  |              |         |

Supplementary Fig. 89 HPLC data of 9.

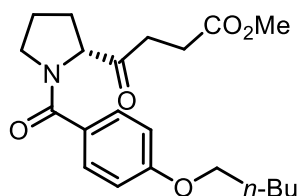

(S, R)-L1: 94% ee

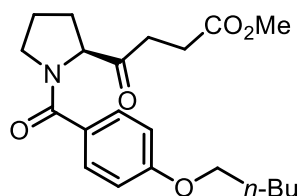

(R, S)-L1: 94% ee

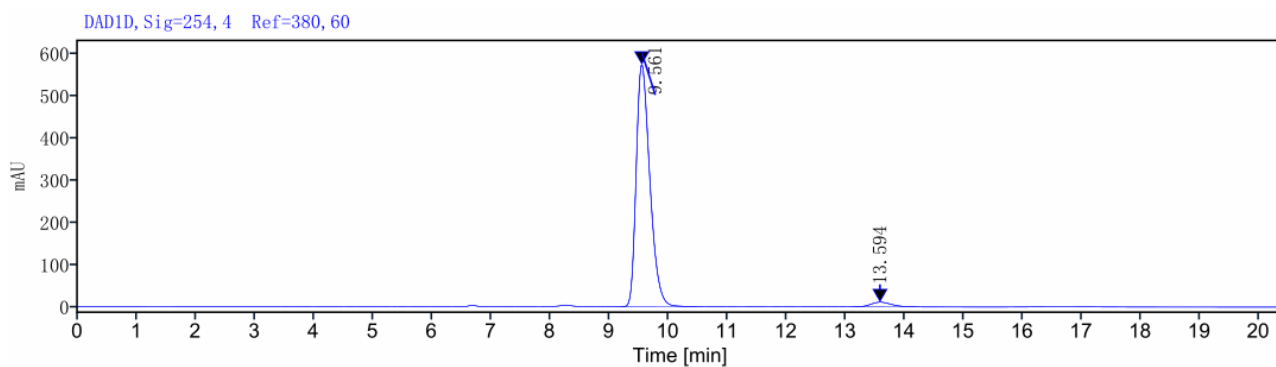

**Signal:** DAD1D, Sig=254, 4 Ref=380, 60

| RetTime<br>[min] | Type | Width<br>[min] | Area<br>[mAU*s] | Height<br>[mAU] | Area<br>% |
|------------------|------|----------------|-----------------|-----------------|-----------|
| 9.561            | BV   | 1.29750        | 9232.45809      | 574.14134       | 97.1588   |
| 13.594           | BV   | 1.04084        | 269.98113       | 11.14164        | 2.8412    |
| Totals           |      |                | 9502.43922      |                 |           |

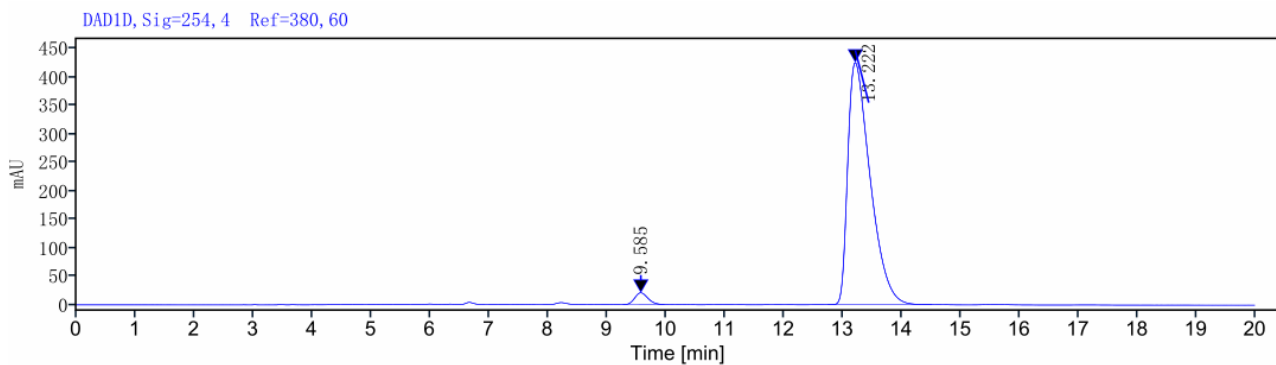

**Signal:** DAD1D, Sig=254, 4 Ref=380, 60

| RetTime<br>[min] | Type | Width<br>[min] | Area<br>[mAU*s] | Height<br>[mAU] | Area<br>% |
|------------------|------|----------------|-----------------|-----------------|-----------|
| 9.585            | BV   | 0.70401        | 320.11285       | 20.65124        | 2.7736    |
| 13.222           | BB   | 1.76250        | 11221.41116     | 425.22644       | 97.2264   |
| Totals           |      |                | 11541.52401     |                 |           |

Supplementary Fig. 90 HPLC data of 10.

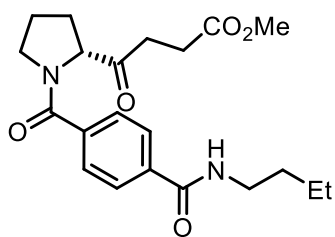

(*S, R*)-L1: 88% ee

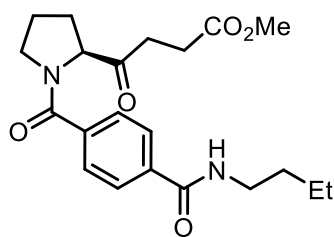

(*R, S*)-L1: 89% ee

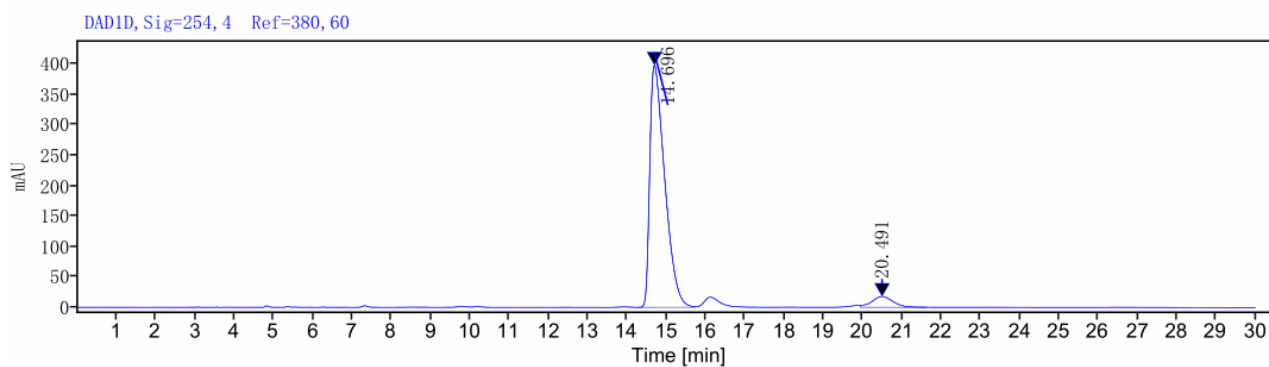

**Signal:** DAD1D, Sig=254, 4 Ref=380, 60

| RetTime [min] | Type | Width [min] | Area [mAU*s] | Height [mAU] | Area %  |
|---------------|------|-------------|--------------|--------------|---------|
| 14.696        | BV   | 1.44159     | 10521.59115  | 398.65081    | 94.0450 |
| 20.491        | MM m | 1.70123     | 666.23225    | 17.78140     | 5.9550  |
| Totals        |      |             | 11187.82340  |              |         |

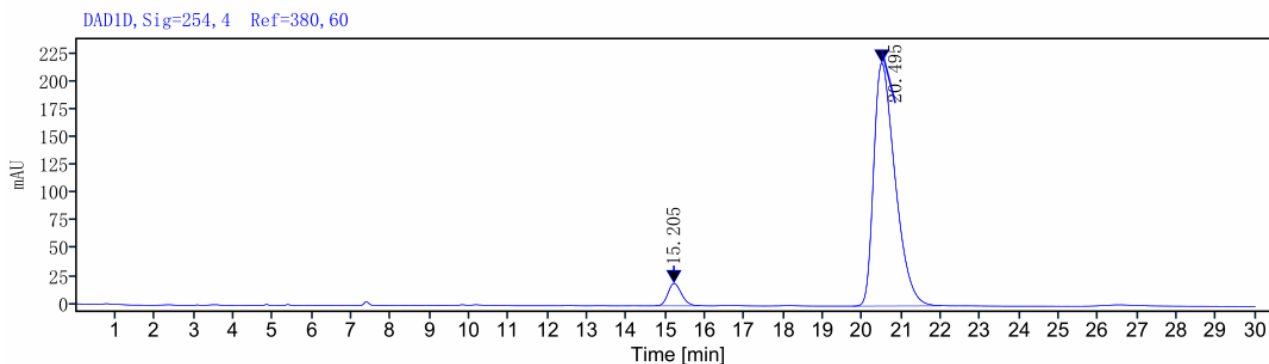

**Signal:** DAD1D, Sig=254, 4 Ref=380, 60

| RetTime [min] | Type | Width [min] | Area [mAU*s] | Height [mAU] | Area %  |
|---------------|------|-------------|--------------|--------------|---------|
| 15.205        | VV   | 1.14637     | 488.97772    | 20.25677     | 5.5703  |
| 20.495        | BV   | 2.25065     | 8289.36065   | 218.93323    | 94.4297 |
| Totals        |      |             | 8778.33837   |              |         |

Supplementary Fig. 91 HPLC data of 11.

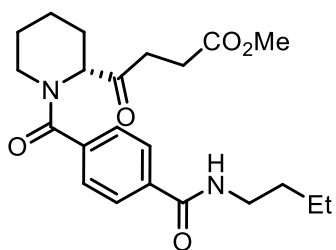

(*S, R*)-L2: 93% ee

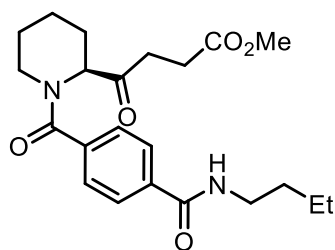

(*R, S*)-L2: 92% ee

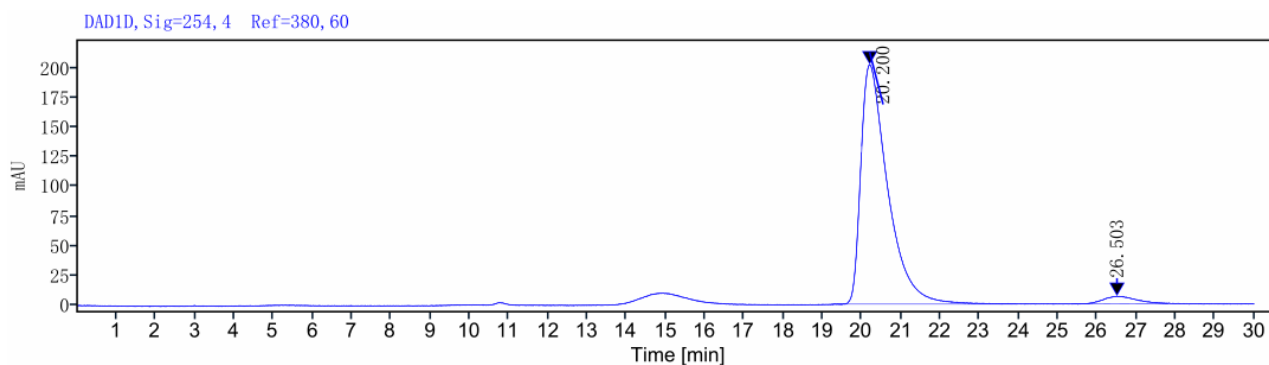

**Signal:** DAD1D, Sig=254, 4 Ref=380, 60

| RetTime [min] | Type | Width [min] | Area [mAU*s] | Height [mAU] | Area %  |
|---------------|------|-------------|--------------|--------------|---------|
| 20.200        | MM m | 4.70886     | 9573.98993   | 201.22933    | 96.6016 |
| 26.503        | MM m | 2.46025     | 336.80467    | 6.40423      | 3.3984  |
| Totals        |      |             | 9910.79460   |              |         |

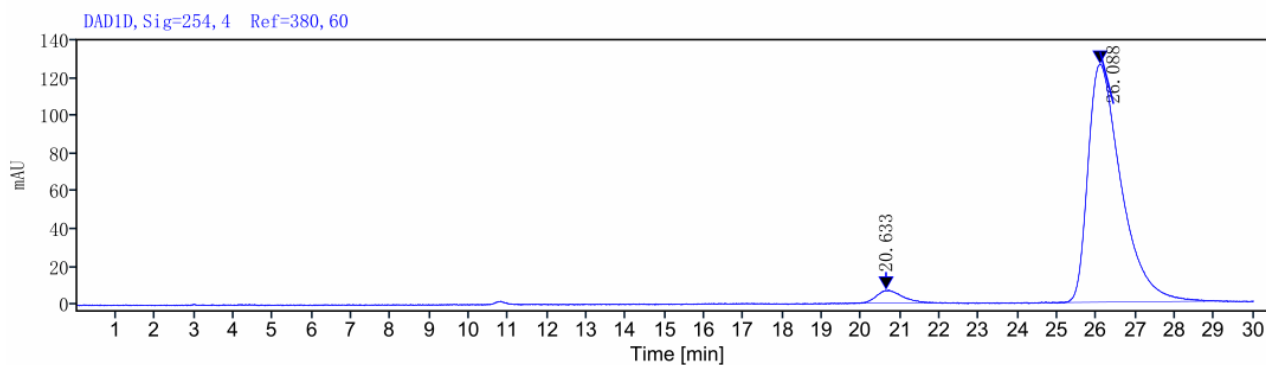

**Signal:** DAD1D, Sig=254, 4 Ref=380, 60

| RetTime [min] | Type | Width [min] | Area [mAU*s] | Height [mAU] | Area %  |
|---------------|------|-------------|--------------|--------------|---------|
| 20.633        | MM m | 2.01053     | 292.60311    | 6.93260      | 3.8128  |
| 26.088        | MM m | 4.17978     | 7381.53419   | 125.91464    | 96.1872 |
| Totals        |      |             | 7674.13730   |              |         |

Supplementary Fig. 92 HPLC data of 12.

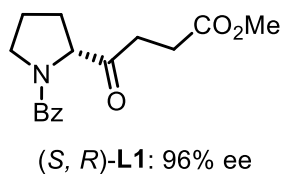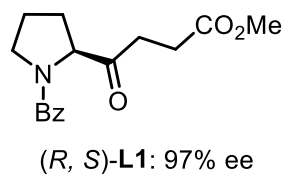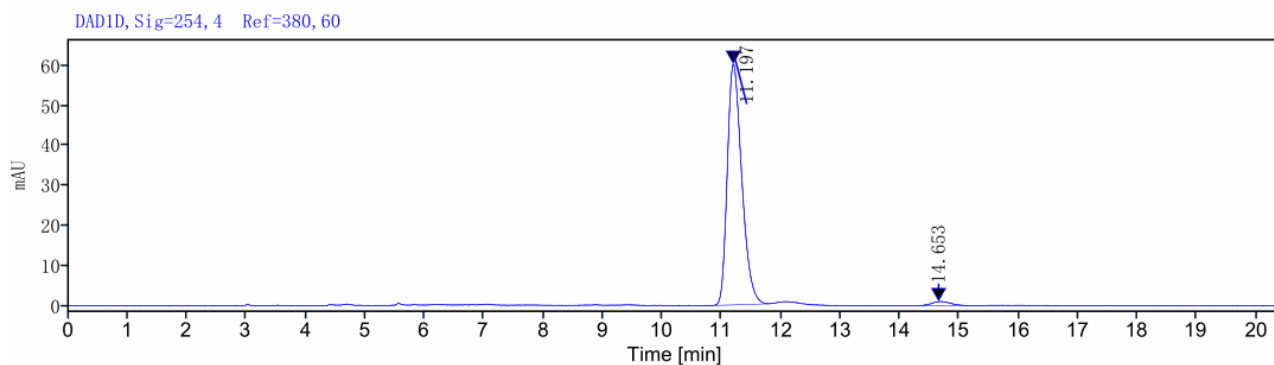

**Signal:** DAD1D, Sig=254, 4 Ref=380, 60

| RetTime<br>[min] | Type | Width<br>[min] | Area<br>[mAU*s] | Height<br>[mAU] | Area<br>% |
|------------------|------|----------------|-----------------|-----------------|-----------|
| 11.197           | VM m | 0.88012        | 1017.68103      | 60.22257        | 97.9896   |
| 14.653           | MM m | 0.77776        | 20.87935        | 1.03752         | 2.0104    |
| Totals           |      |                | 1038.56038      |                 |           |

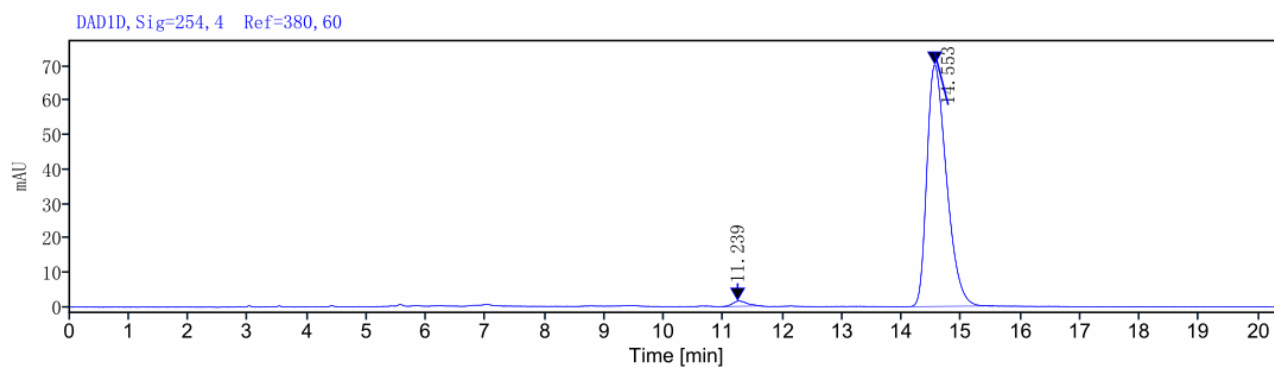

**Signal:** DAD1D, Sig=254, 4 Ref=380, 60

| RetTime<br>[min] | Type | Width<br>[min] | Area<br>[mAU*s] | Height<br>[mAU] | Area<br>% |
|------------------|------|----------------|-----------------|-----------------|-----------|
| 11.239           | MM m | 0.66665        | 26.21681        | 1.55574         | 1.6013    |
| 14.553           | VM m | 1.37419        | 1610.98588      | 70.23717        | 98.3987   |
| Totals           |      |                | 1637.20269      |                 |           |

Supplementary Fig. 93 HPLC data of 13.

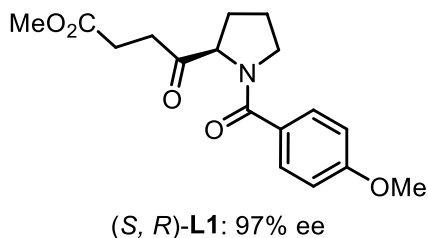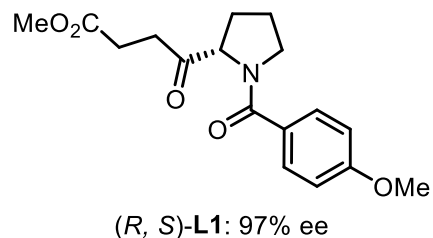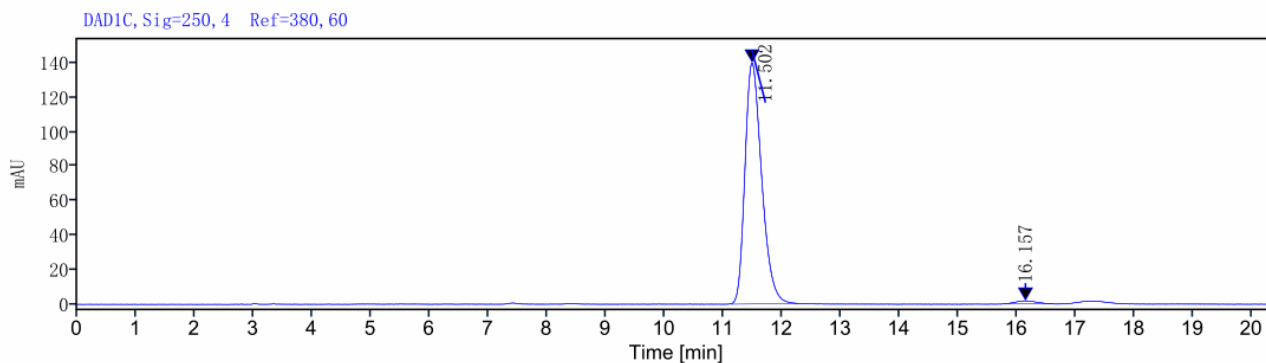

Signal: DAD1C, Sig=250, 4 Ref=380, 60

| RetTime [min] | Type | Width [min] | Area [mAU*s] | Height [mAU] | Area %  |
|---------------|------|-------------|--------------|--------------|---------|
| 11.502        | VM m | 1.14763     | 2769.16118   | 139.94796    | 98.4951 |
| 16.157        | MM m | 0.83532     | 42.31065     | 1.77759      | 1.5049  |
| Totals        |      |             | 2811.47183   |              |         |

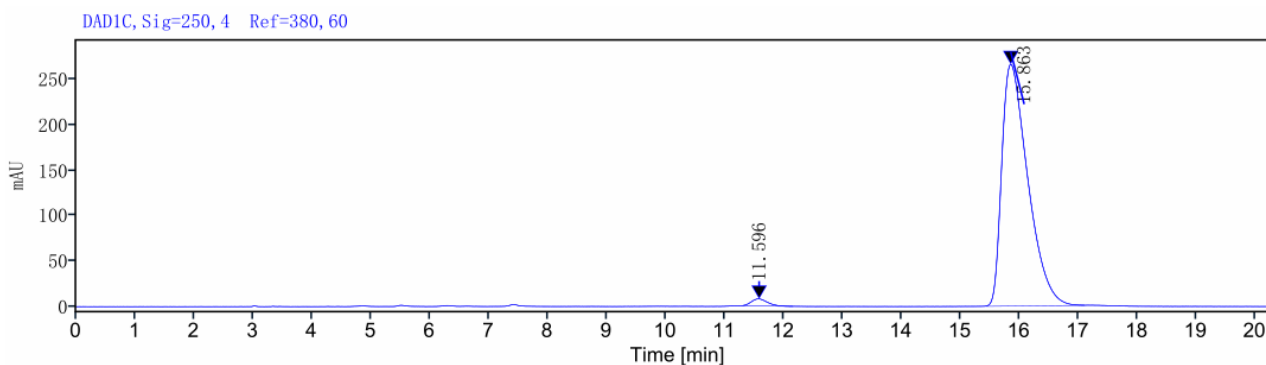

Signal: DAD1C, Sig=250, 4 Ref=380, 60

| RetTime [min] | Type | Width [min] | Area [mAU*s] | Height [mAU] | Area %  |
|---------------|------|-------------|--------------|--------------|---------|
| 11.596        | MM m | 0.85919     | 143.94305    | 7.75212      | 1.7276  |
| 15.863        | VM m | 1.66737     | 8188.23525   | 266.95307    | 98.2724 |
| Totals        |      |             | 8332.17830   |              |         |

Supplementary Fig. 94 HPLC data of 14.

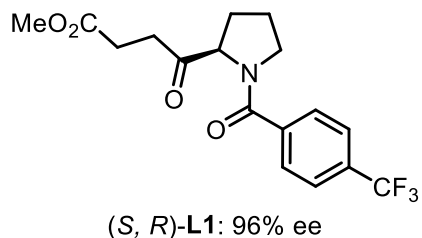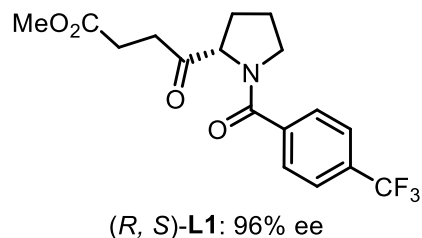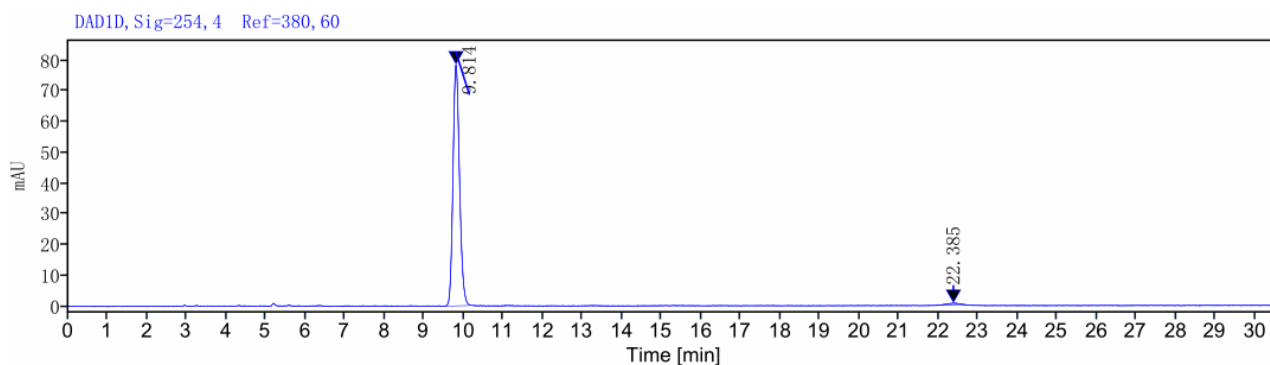

Signal: DAD1D, Sig=254, 4 Ref=380, 60

| RetTime [min] | Type | Width [min] | Area [mAU*s] | Height [mAU] | Area %  |
|---------------|------|-------------|--------------|--------------|---------|
| 9.814         | VV   | 0.58531     | 897.51794    | 78.57721     | 98.1537 |
| 22.385        | MM m | 0.84471     | 16.88267     | 0.77112      | 1.8463  |
| Totals        |      |             | 914.40061    |              |         |

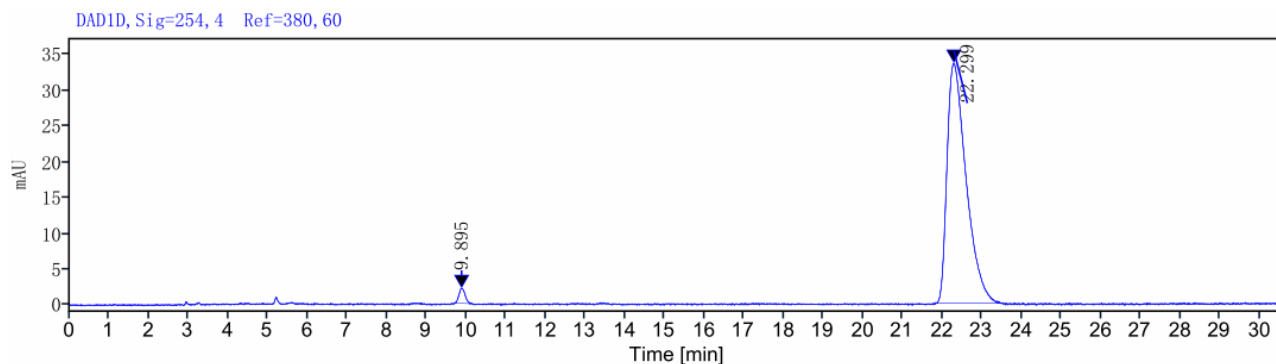

Signal: DAD1D, Sig=254, 4 Ref=380, 60

| RetTime [min] | Type | Width [min] | Area [mAU*s] | Height [mAU] | Area %  |
|---------------|------|-------------|--------------|--------------|---------|
| 9.895         | MM m | 0.42236     | 22.34273     | 2.11907      | 1.9514  |
| 22.299        | MM m | 1.67488     | 1122.63434   | 33.56514     | 98.0486 |
| Totals        |      |             | 1144.97707   |              |         |

Supplementary Fig. 95 HPLC data of 15.

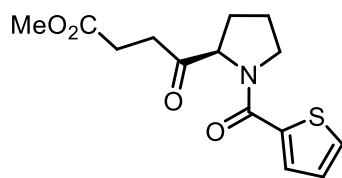

(*S, R*)-L1: 97% ee

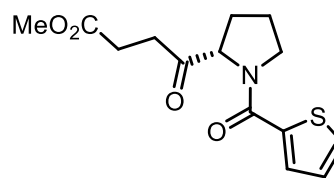

(*R, S*)-L1: 97% ee

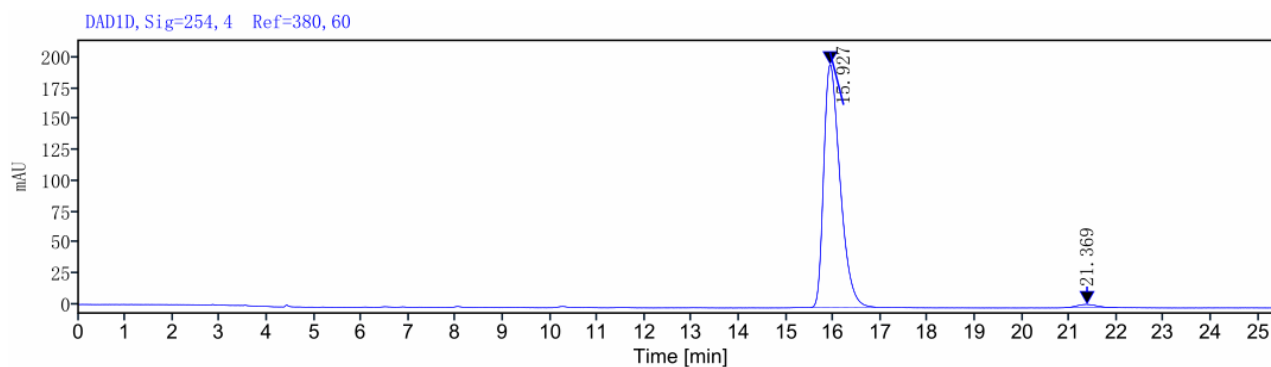

**Signal:** DAD1D, Sig=254, 4 Ref=380, 60

| RetTime<br>[min] | Type | Width<br>[min] | Area<br>[mAU*s] | Height<br>[mAU] | Area<br>% |
|------------------|------|----------------|-----------------|-----------------|-----------|
| 15.927           | VM m | 1.37166        | 4729.27595      | 196.66464       | 98.3866   |
| 21.369           | MM m | 1.11019        | 77.55251        | 2.69487         | 1.6134    |
| Totals           |      |                | 4806.82847      |                 |           |

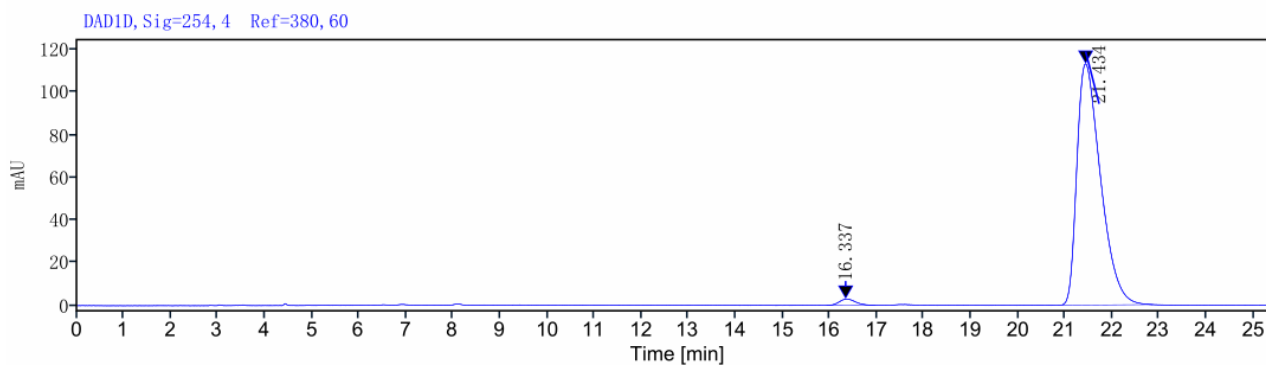

**Signal:** DAD1D, Sig=254, 4 Ref=380, 60

| RetTime<br>[min] | Type | Width<br>[min] | Area<br>[mAU*s] | Height<br>[mAU] | Area<br>% |
|------------------|------|----------------|-----------------|-----------------|-----------|
| 16.337           | MM m | 1.03778        | 68.46514        | 3.01906         | 1.7052    |
| 21.434           | VM m | 1.90358        | 3946.51254      | 113.12180       | 98.2948   |
| Totals           |      |                | 4014.97768      |                 |           |

Supplementary Fig. 96 HPLC data of 16.

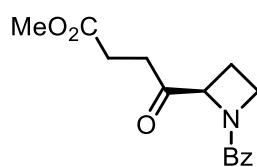

(*S, R*)-L1: 85% ee

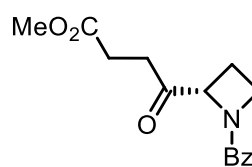

(*R, S*)-L1: 84% ee

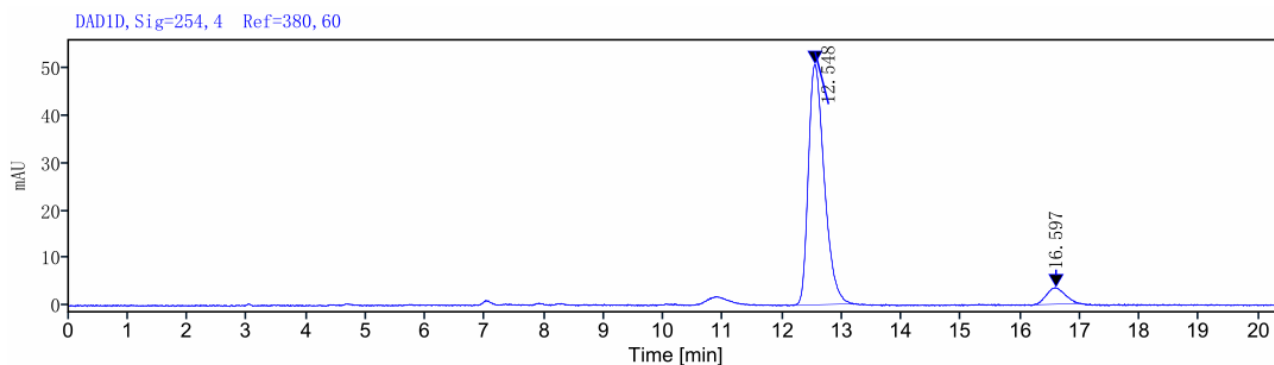

**Signal:** DAD1D, Sig=254, 4 Ref=380, 60

| RetTime [min] | Type | Width [min] | Area [mAU*s] | Height [mAU] | Area %  |
|---------------|------|-------------|--------------|--------------|---------|
| 12.548        | VM m | 0.95841     | 939.30118    | 50.63576     | 92.6329 |
| 16.597        | MM m | 0.77233     | 74.70300     | 3.52059      | 7.3671  |
| Totals        |      |             | 1014.00419   |              |         |

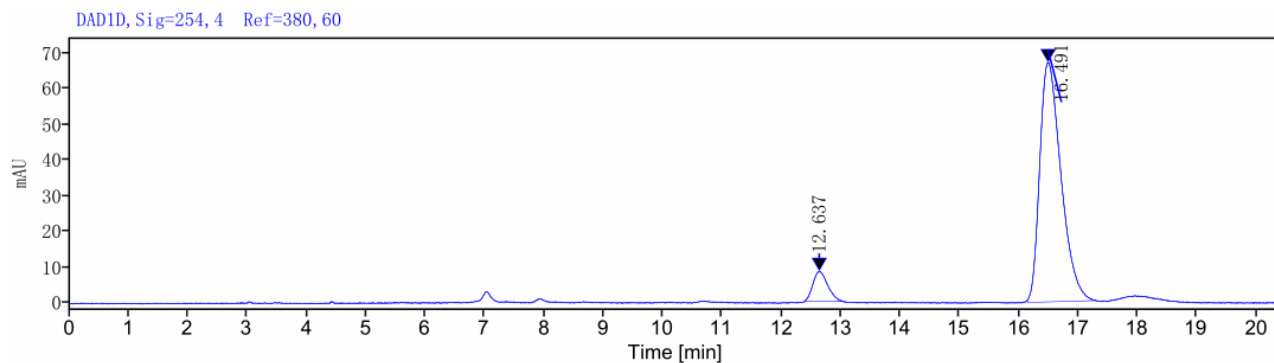

**Signal:** DAD1D, Sig=254, 4 Ref=380, 60

| RetTime [min] | Type | Width [min] | Area [mAU*s] | Height [mAU] | Area %  |
|---------------|------|-------------|--------------|--------------|---------|
| 12.637        | MM m | 0.65165     | 143.96919    | 8.47829      | 7.9479  |
| 16.491        | VM m | 1.16430     | 1667.43798   | 67.04094     | 92.0521 |
| Totals        |      |             | 1811.40717   |              |         |

Supplementary Fig. 97 HPLC data of 17.

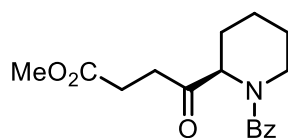

(*S, R*)-L2: 94% ee

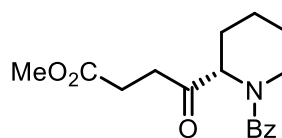

(*R, S*)-L2: 95% ee

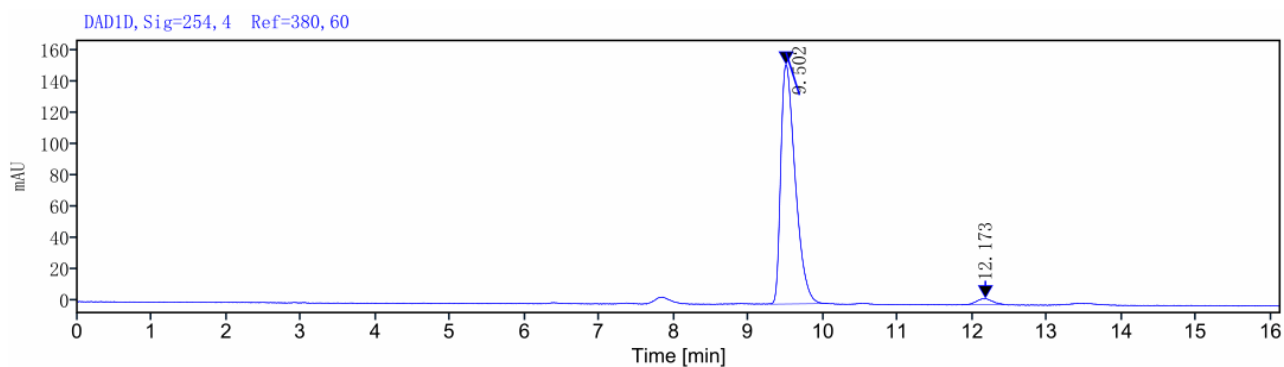

**Signal:** DAD1D, Sig=254, 4 Ref=380, 60

| RetTime [min] | Type | Width [min] | Area [mAU*s] | Height [mAU] | Area %  |
|---------------|------|-------------|--------------|--------------|---------|
| 9.502         | VM m | 0.76845     | 2052.56184   | 152.38892    | 97.2078 |
| 12.173        | MM m | 0.57923     | 58.95752     | 3.96462      | 2.7922  |
| Totals        |      |             | 2111.51936   |              |         |

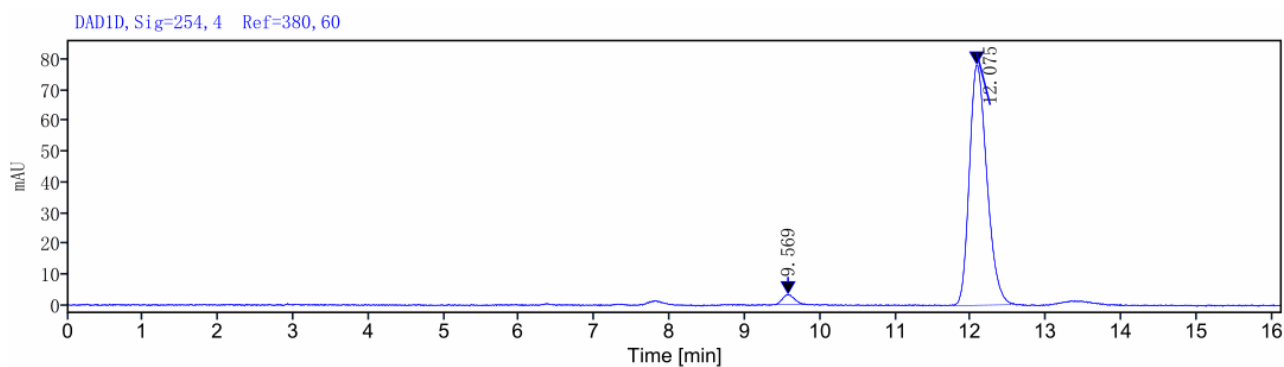

**Signal:** DAD1D, Sig=254, 4 Ref=380, 60

| RetTime [min] | Type | Width [min] | Area [mAU*s] | Height [mAU] | Area %  |
|---------------|------|-------------|--------------|--------------|---------|
| 9.569         | MM m | 0.41029     | 34.01206     | 3.18478      | 2.6189  |
| 12.075        | BM m | 0.75830     | 1264.71796   | 78.27704     | 97.3811 |
| Totals        |      |             | 1298.73002   |              |         |

Supplementary Fig. 98 HPLC data of 18.

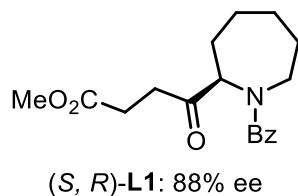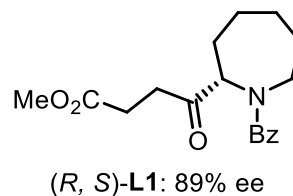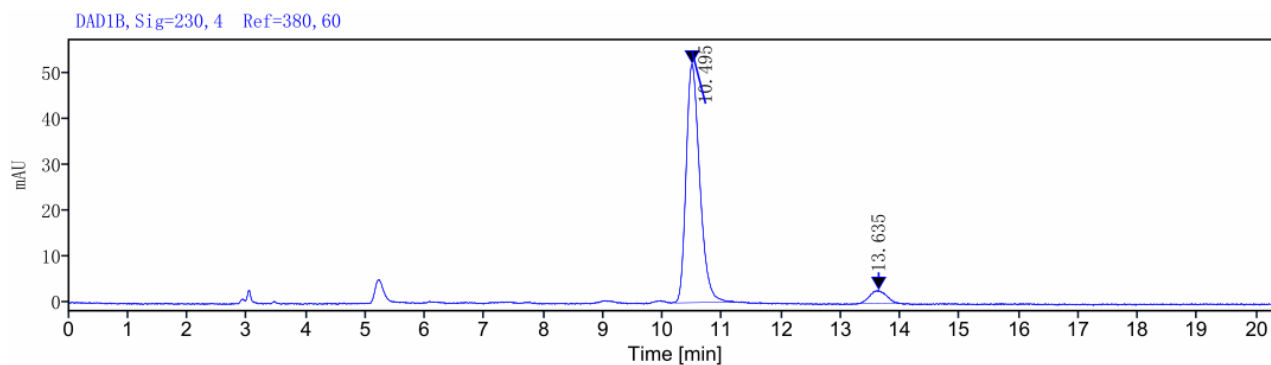

**Signal:** DAD1B, Sig=230, 4 Ref=380, 60

| RetTime<br>[min] | Type | Width<br>[min] | Area<br>[mAU*s] | Height<br>[mAU] | Area<br>% |
|------------------|------|----------------|-----------------|-----------------|-----------|
| 10.495           | VM m | 1.01422        | 829.27266       | 52.23380        | 93.8102   |
| 13.635           | MM m | 0.65537        | 54.71766        | 2.92034         | 6.1898    |
| Totals           |      |                | 883.99032       |                 |           |

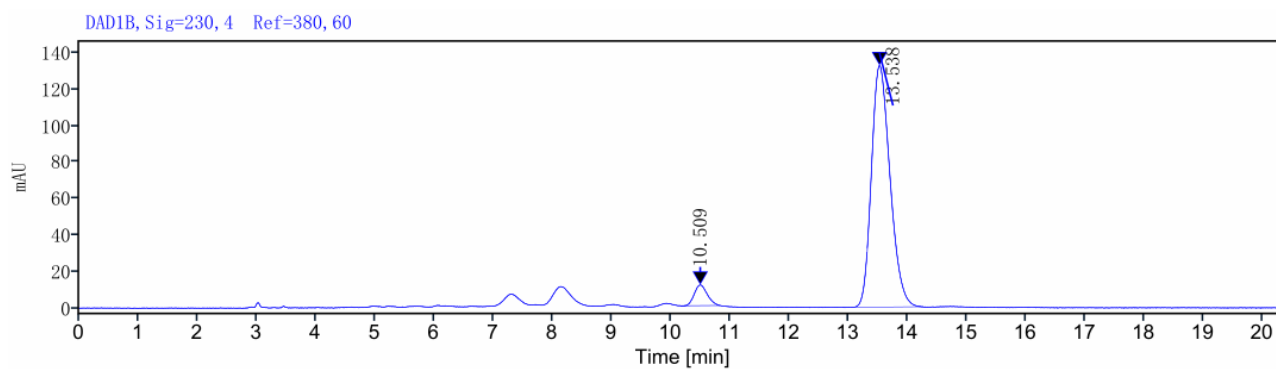

**Signal:** DAD1B, Sig=230, 4 Ref=380, 60

| RetTime<br>[min] | Type | Width<br>[min] | Area<br>[mAU*s] | Height<br>[mAU] | Area<br>% |
|------------------|------|----------------|-----------------|-----------------|-----------|
| 10.509           | MM m | 0.66574        | 171.64600       | 11.44068        | 5.5905    |
| 13.538           | VM m | 1.10488        | 2898.67702      | 132.61787       | 94.4095   |
| Totals           |      |                | 3070.32301      |                 |           |

Supplementary Fig. 99 HPLC data of 19.

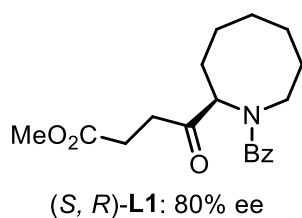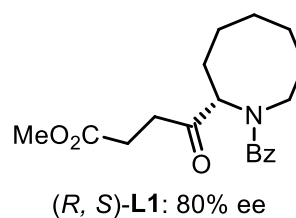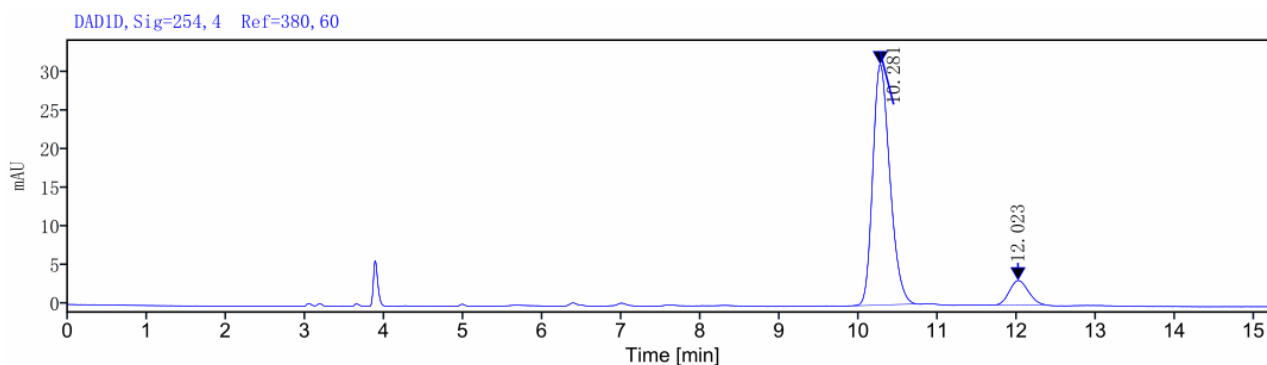

**Signal:** DAD1D, Sig=254, 4 Ref=380, 60

| RetTime [min] | Type | Width [min] | Area [mAU*s] | Height [mAU] | Area %  |
|---------------|------|-------------|--------------|--------------|---------|
| 10.281        | VM m | 0.77171     | 470.95717    | 31.30208     | 89.9130 |
| 12.023        | VM m | 0.58971     | 52.83495     | 3.18298      | 10.0870 |
| Totals        |      |             | 523.79212    |              |         |

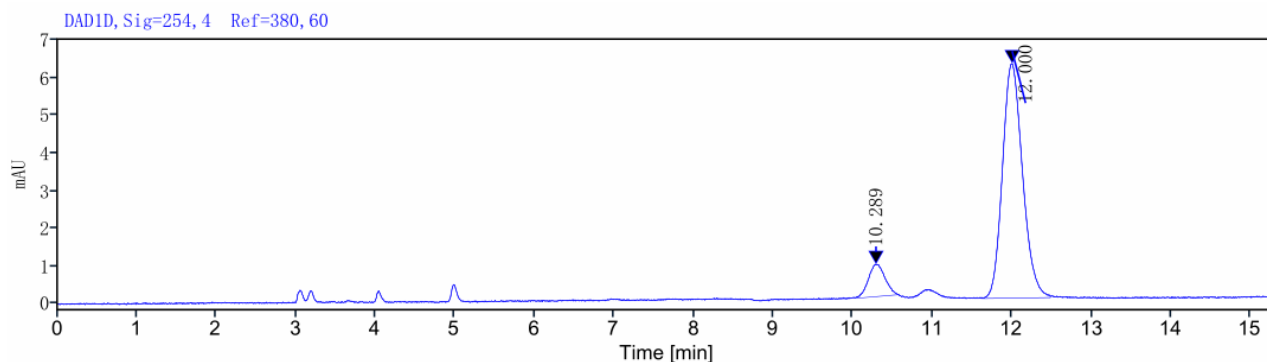

**Signal:** DAD1D, Sig=254, 4 Ref=380, 60

| RetTime [min] | Type | Width [min] | Area [mAU*s] | Height [mAU] | Area %  |
|---------------|------|-------------|--------------|--------------|---------|
| 10.289        | VM m | 0.50557     | 12.37051     | 0.86164      | 10.1994 |
| 12.000        | VV   | 0.85780     | 108.91631    | 6.22194      | 89.8006 |
| Totals        |      |             | 121.28682    |              |         |

Supplementary Fig. 100 HPLC data of 20.

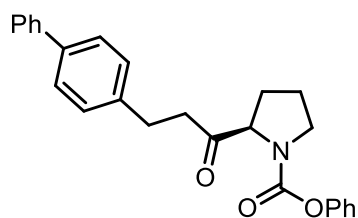

(S, R)-L1: 89% ee

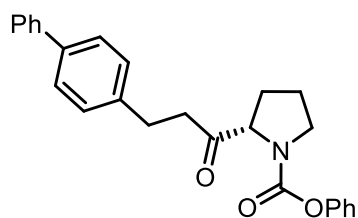

(R, S)-L1: 90% ee

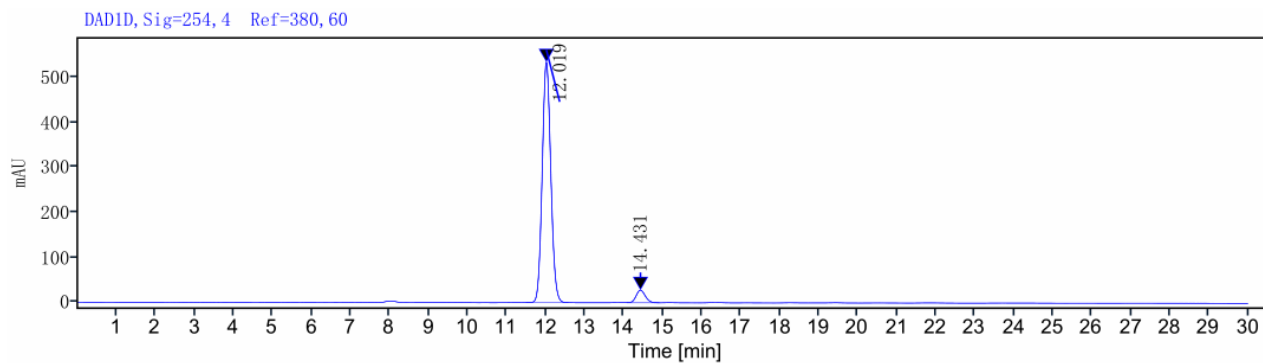

**Signal:** DAD1D, Sig=254, 4 Ref=380, 60

| RetTime [min] | Type | Width [min] | Area [mAU*s] | Height [mAU] | Area %  |
|---------------|------|-------------|--------------|--------------|---------|
| 12.019        | VV   | 1.08752     | 8193.76331   | 534.07784    | 94.6944 |
| 14.431        | VV   | 0.83854     | 459.08969    | 28.13462     | 5.3056  |
| Totals        |      |             | 8652.85300   |              |         |

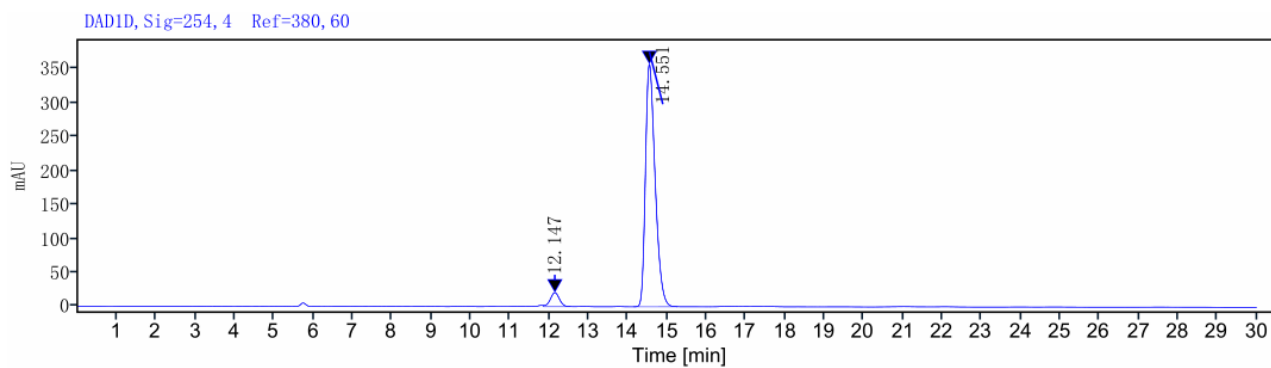

**Signal:** DAD1D, Sig=254, 4 Ref=380, 60

| RetTime [min] | Type | Width [min] | Area [mAU*s] | Height [mAU] | Area %  |
|---------------|------|-------------|--------------|--------------|---------|
| 12.147        | VV   | 0.69351     | 334.93597    | 20.78001     | 5.1880  |
| 14.551        | VV   | 1.11700     | 6121.05251   | 357.51652    | 94.8120 |
| Totals        |      |             | 6455.98848   |              |         |

Supplementary Fig. 101 HPLC data of 21.

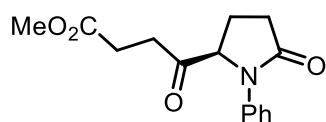

(*S*, *R*)-L2: 88% ee

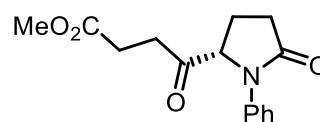

(*R*, *S*)-L2: 88% ee

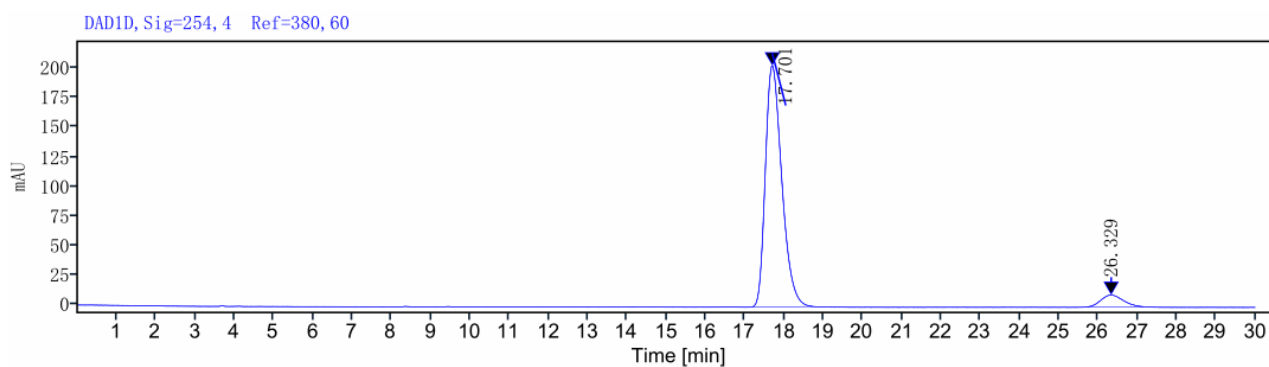

**Signal:** DAD1D, Sig=254, 4 Ref=380, 60

| RetTime<br>[min] | Type | Width<br>[min] | Area<br>[mAU*s] | Height<br>[mAU] | Area<br>% |
|------------------|------|----------------|-----------------|-----------------|-----------|
| 17.701           | VM m | 1.53215        | 5923.53078      | 203.63630       | 93.8830   |
| 26.329           | MM m | 1.44807        | 385.94900       | 10.03229        | 6.1170    |
| Totals           |      |                | 6309.47978      |                 |           |

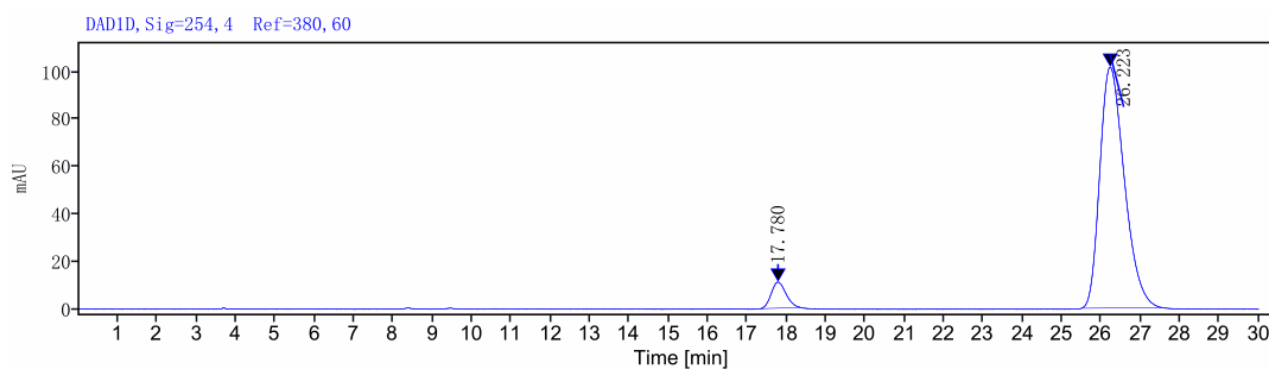

**Signal:** DAD1D, Sig=254, 4 Ref=380, 60

| RetTime<br>[min] | Type | Width<br>[min] | Area<br>[mAU*s] | Height<br>[mAU] | Area<br>% |
|------------------|------|----------------|-----------------|-----------------|-----------|
| 17.780           | MM m | 1.01368        | 283.60878       | 11.06339        | 6.0565    |
| 26.223           | MM m | 2.02735        | 4399.13368      | 101.67522       | 93.9435   |
| Totals           |      |                | 4682.74246      |                 |           |

Supplementary Fig. 102 HPLC data of 22.

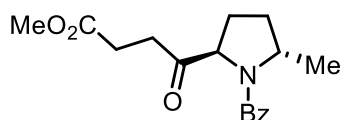

(*S, R*)-L2: 99:1 dr

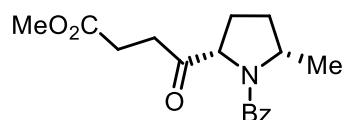

(*R, S*)-L2: 34:66 dr

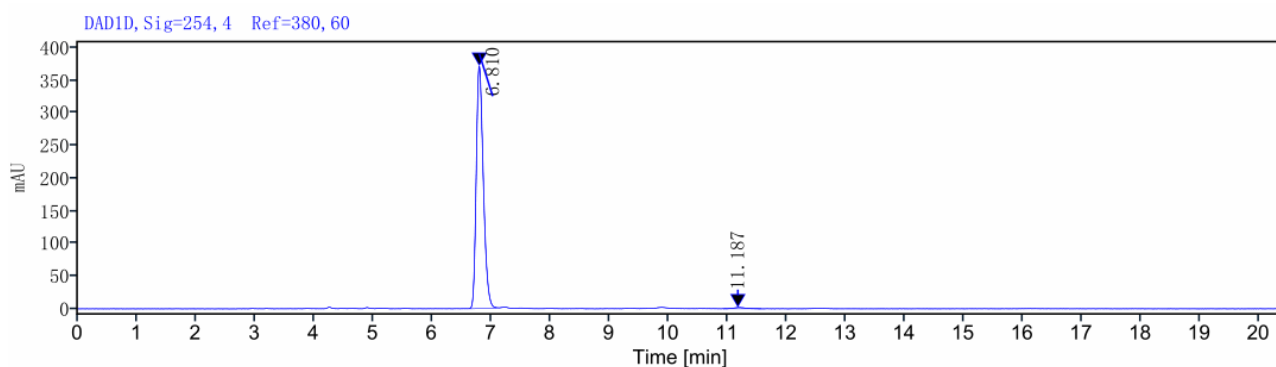

**Signal:** DAD1D, Sig=254, 4 Ref=380, 60

| RetTime<br>[min] | Type | Width<br>[min] | Area<br>[mAU*s] | Height<br>[mAU] | Area<br>% |
|------------------|------|----------------|-----------------|-----------------|-----------|
| 6.810            | VV   | 0.45353        | 3087.88920      | 371.32551       | 99.2172   |
| 11.187           | MM m | 0.63974        | 24.36418        | 1.97725         | 0.7828    |
| Totals           |      |                | 3112.25338      |                 |           |

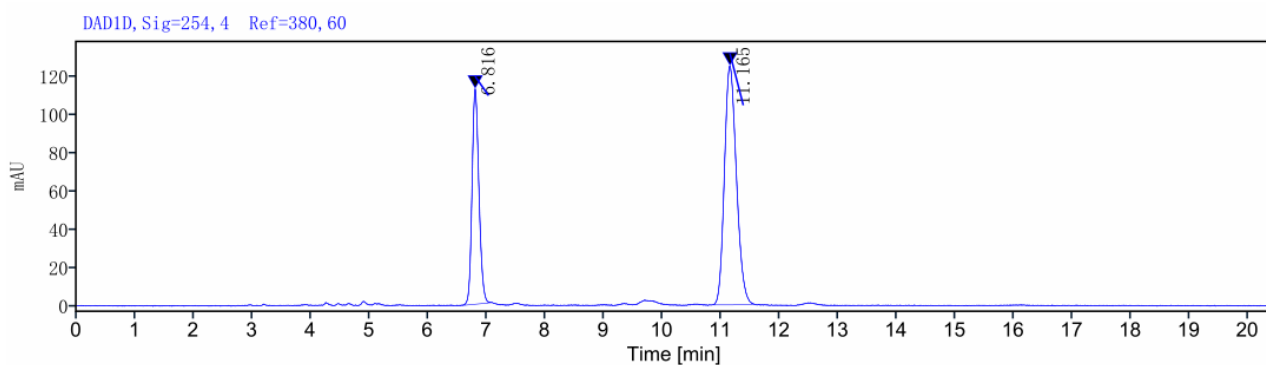

**Signal:** DAD1D, Sig=254, 4 Ref=380, 60

| RetTime<br>[min] | Type | Width<br>[min] | Area<br>[mAU*s] | Height<br>[mAU] | Area<br>% |
|------------------|------|----------------|-----------------|-----------------|-----------|
| 6.816            | VV   | 0.41081        | 922.68171       | 113.15263       | 34.0736   |
| 11.165           | VV   | 0.64798        | 1785.22930      | 125.56824       | 65.9264   |
| Totals           |      |                | 2707.91101      |                 |           |

Supplementary Fig. 103 HPLC data of 23.

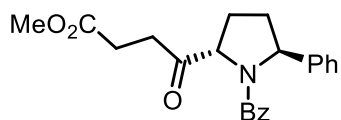

(S, R)-L2: 96:4 dr

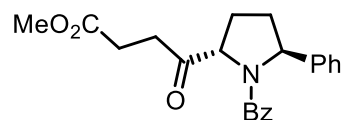

(R, S)-L2: > 99:1 dr

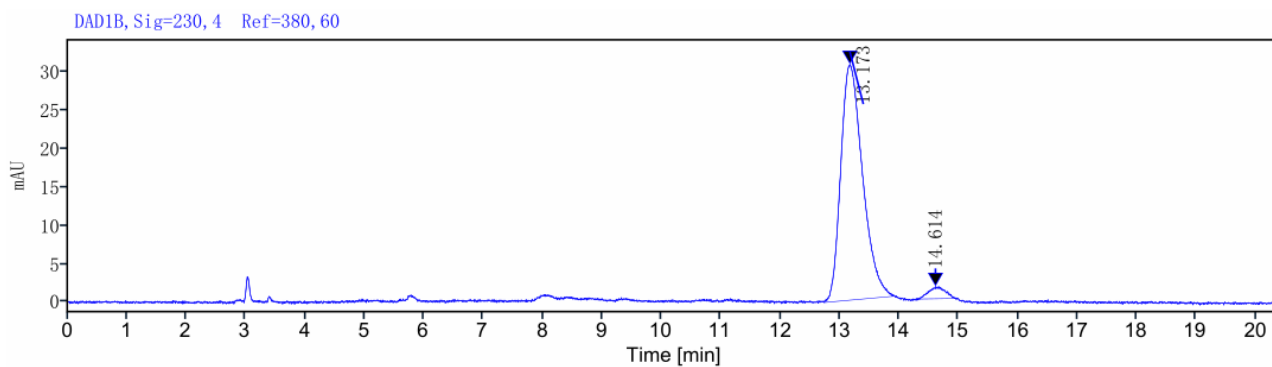

**Signal:** DAD1B, Sig=230, 4 Ref=380, 60

| RetTime<br>[min] | Type | Width<br>[min] | Area<br>[mAU*s] | Height<br>[mAU] | Area<br>% |
|------------------|------|----------------|-----------------|-----------------|-----------|
| 13.173           | MM m | 1.15512        | 786.57900       | 30.87831        | 96.3095   |
| 14.614           | MM m | 0.66007        | 30.14148        | 1.64486         | 3.6905    |
| Totals           |      |                | 816.72047       |                 |           |

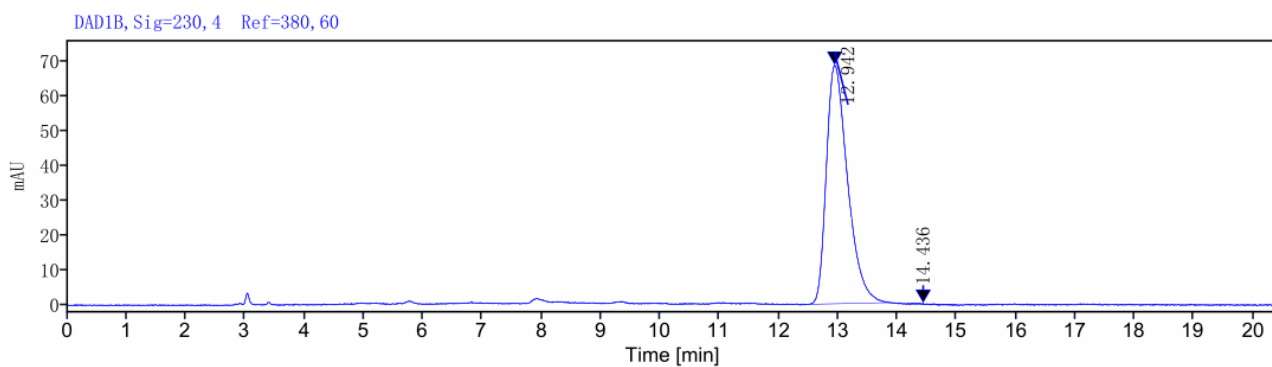

**Signal:** DAD1B, Sig=230, 4 Ref=380, 60

| RetTime<br>[min] | Type | Width<br>[min] | Area<br>[mAU*s] | Height<br>[mAU] | Area<br>% |
|------------------|------|----------------|-----------------|-----------------|-----------|
| 12.942           | VM m | 1.31245        | 1710.33564      | 68.82133        | 99.7642   |
| 14.436           | MM m | 0.82508        | 4.04175         | 0.41934         | 0.2358    |
| Totals           |      |                | 1714.37739      |                 |           |

Supplementary Fig. 104 HPLC data of 24.

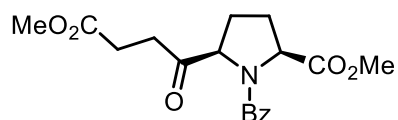

(S, R)-L2: 52:48 dr

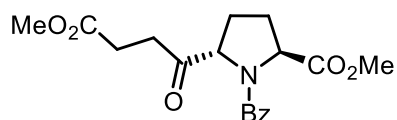

(R, S)-L2: 1:99 dr

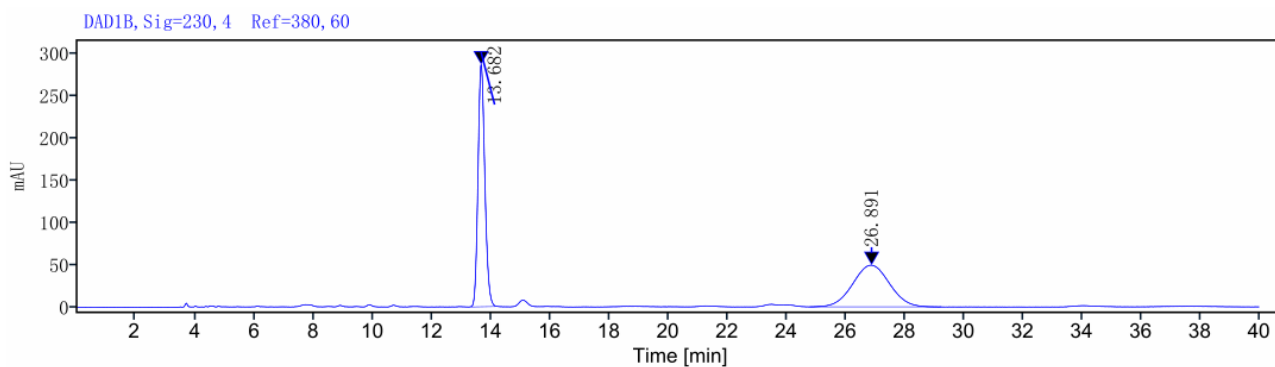

**Signal:** DAD1B, Sig=230, 4 Ref=380, 60

| RetTime<br>[min] | Type | Width<br>[min] | Area<br>[mAU*s] | Height<br>[mAU] | Area<br>% |
|------------------|------|----------------|-----------------|-----------------|-----------|
| 13.682           | VV   | 0.80128        | 4616.36806      | 287.83168       | 51.8670   |
| 26.891           | MM m | 4.44774        | 4284.02483      | 49.70564        | 48.1330   |
| Totals           |      |                | 8900.39289      |                 |           |

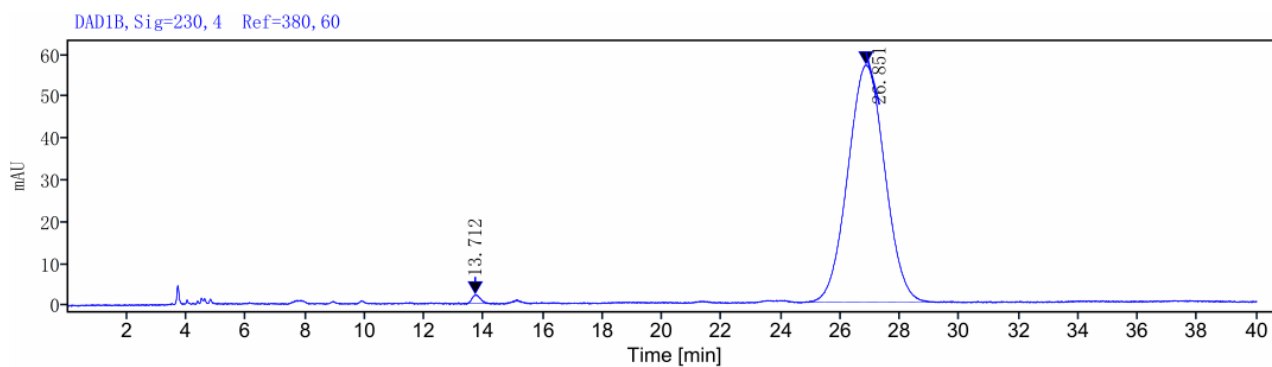

**Signal:** DAD1B, Sig=230, 4 Ref=380, 60

| RetTime<br>[min] | Type | Width<br>[min] | Area<br>[mAU*s] | Height<br>[mAU] | Area<br>% |
|------------------|------|----------------|-----------------|-----------------|-----------|
| 13.712           | MM m | 1.06624        | 39.88872        | 2.14313         | 0.8090    |
| 26.851           | MM m | 4.90470        | 4890.49399      | 56.84360        | 99.1910   |
| Totals           |      |                | 4930.38271      |                 |           |

Supplementary Fig. 105 HPLC data of 25.

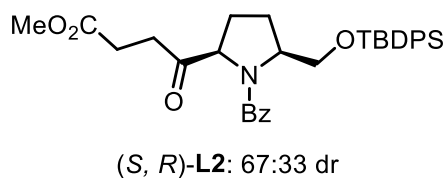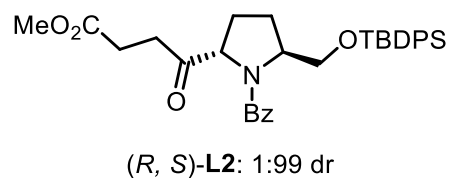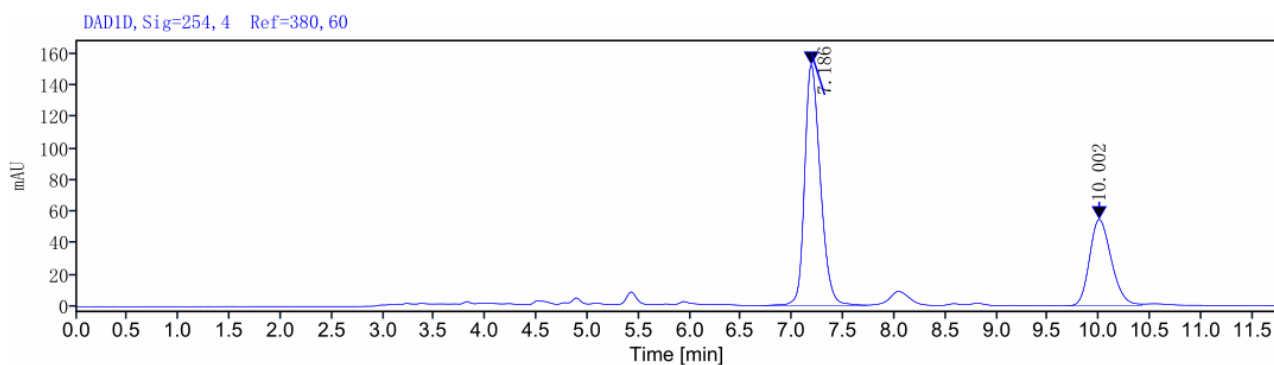

Signal: DAD1D, Sig=254, 4 Ref=380, 60

| RetTime [min] | Type | Width [min] | Area [mAU*s] | Height [mAU] | Area %  |
|---------------|------|-------------|--------------|--------------|---------|
| 7.186         | BV   | 1.00983     | 1633.70195   | 152.72679    | 66.9166 |
| 10.002        | BV   | 0.73074     | 807.69875    | 54.66054     | 33.0834 |
| Totals        |      |             | 2441.40071   |              |         |

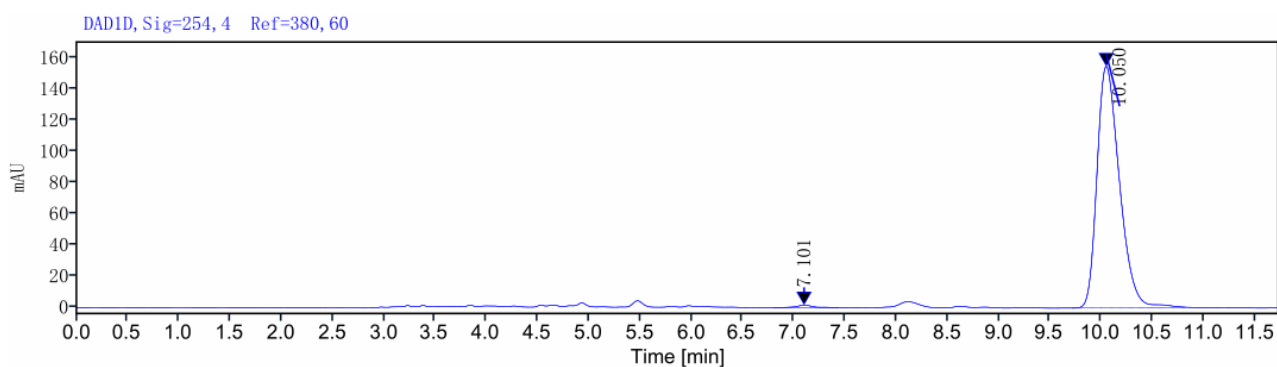

Signal: DAD1D, Sig=254, 4 Ref=380, 60

| RetTime [min] | Type | Width [min] | Area [mAU*s] | Height [mAU] | Area %  |
|---------------|------|-------------|--------------|--------------|---------|
| 7.101         | MM m | 0.65216     | 18.94590     | 1.67288      | 0.8017  |
| 10.050        | BM m | 1.10096     | 2344.33552   | 154.43907    | 99.1983 |
| Totals        |      |             | 2363.28142   |              |         |

Supplementary Fig. 106 HPLC data of 26.

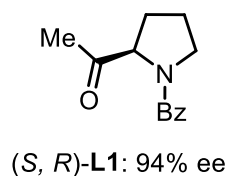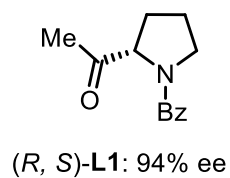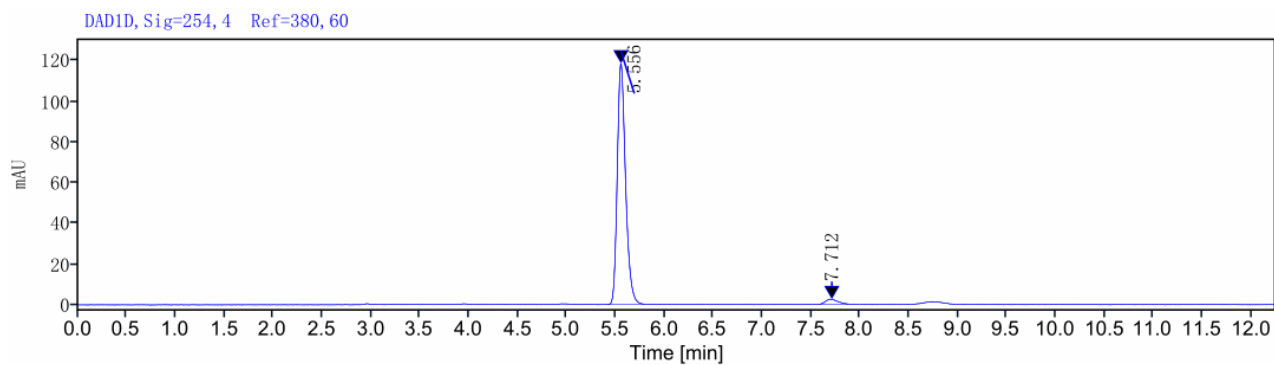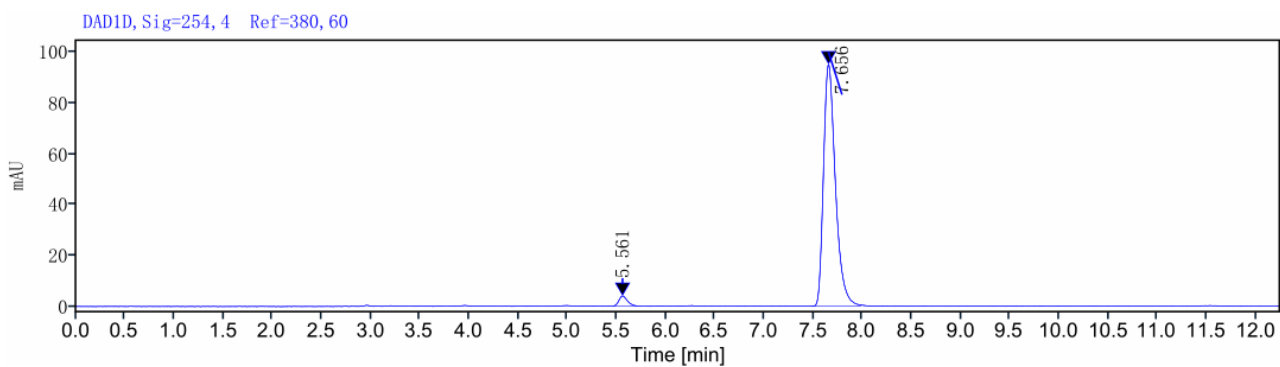

Supplementary Fig. 107 HPLC data of 27.

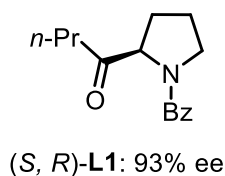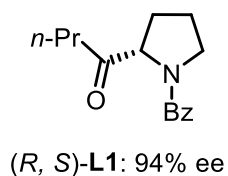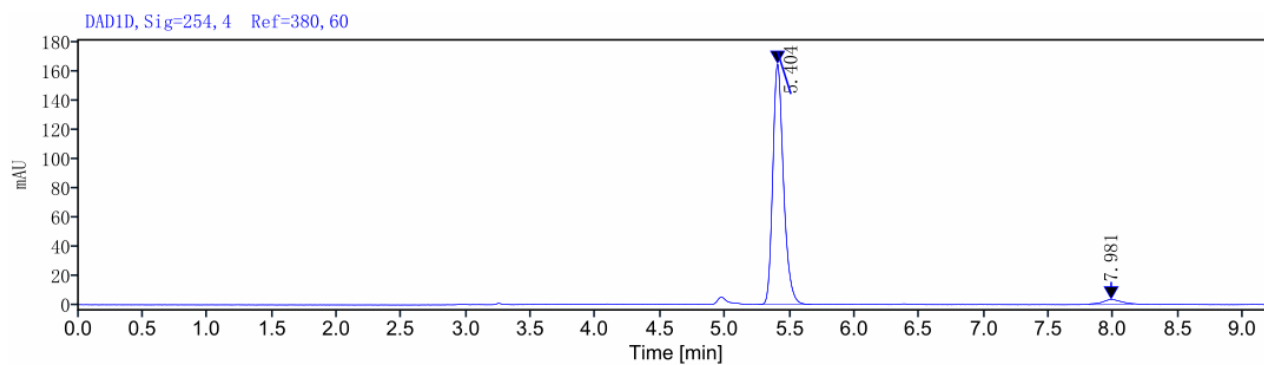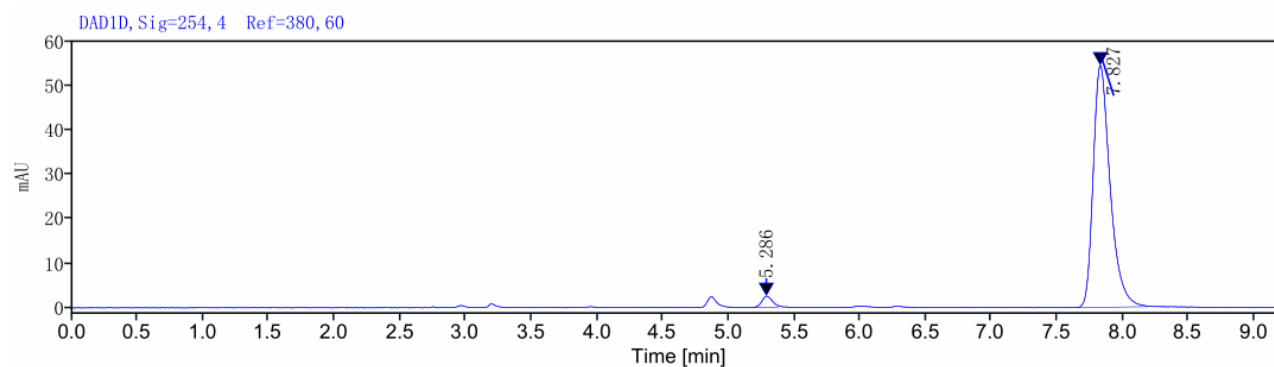

Supplementary Fig. 108 HPLC data of 28.

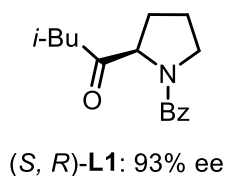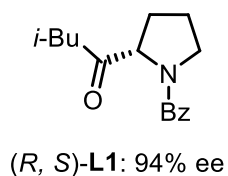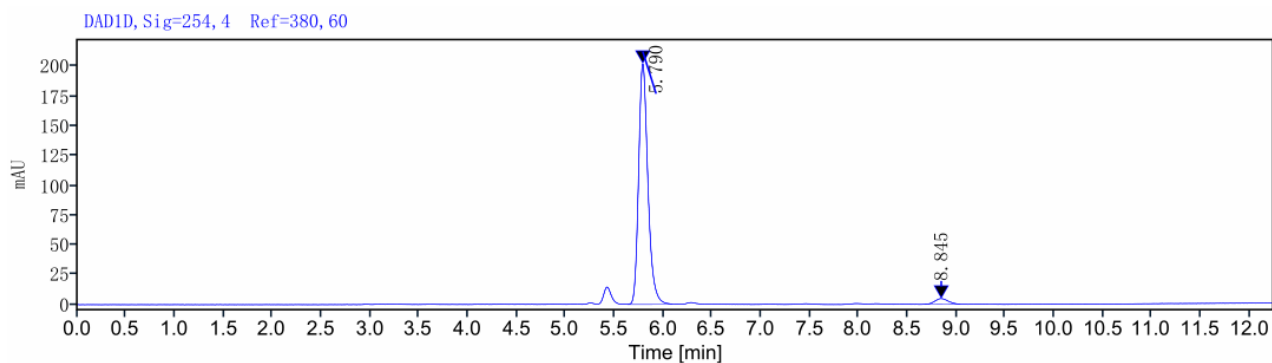

Signal: DAD1D, Sig=254, 4 Ref=380, 60

| RetTime<br>[min] | Type | Width<br>[min] | Area<br>[mAU*s] | Height<br>[mAU] | Area<br>% |
|------------------|------|----------------|-----------------|-----------------|-----------|
| 5.790            | BV   | 0.45248        | 1335.50494      | 202.44672       | 96.6269   |
| 8.845            | BB m | 0.36801        | 46.62059        | 4.83386         | 3.3731    |
| Totals           |      |                | 1382.12552      |                 |           |

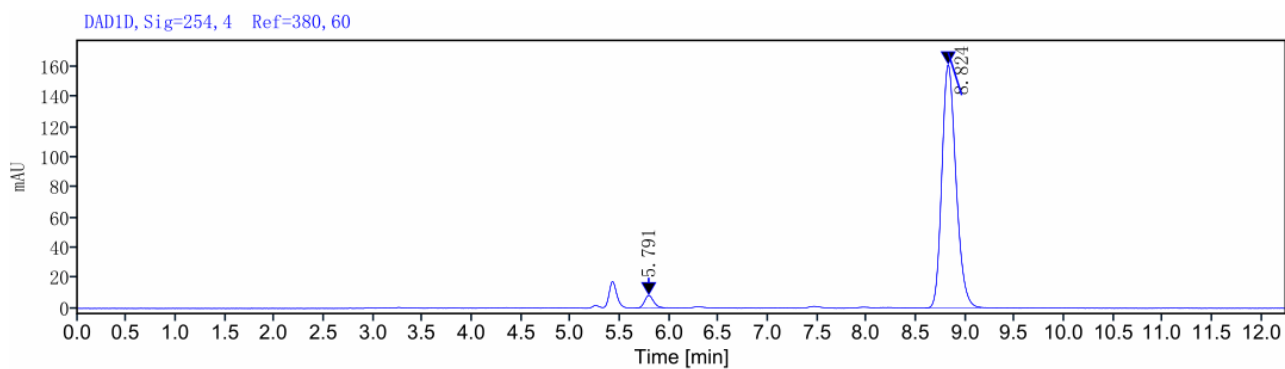

Signal: DAD1D, Sig=254, 4 Ref=380, 60

| RetTime<br>[min] | Type | Width<br>[min] | Area<br>[mAU*s] | Height<br>[mAU] | Area<br>% |
|------------------|------|----------------|-----------------|-----------------|-----------|
| 5.791            | VV   | 0.29554        | 53.13112        | 8.27021         | 3.2137    |
| 8.824            | VV   | 0.56145        | 1600.13445      | 161.01261       | 96.7863   |
| Totals           |      |                | 1653.26558      |                 |           |

Supplementary Fig. 109 HPLC data of 29.

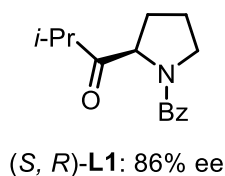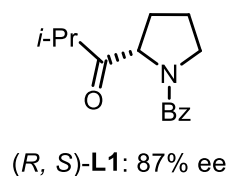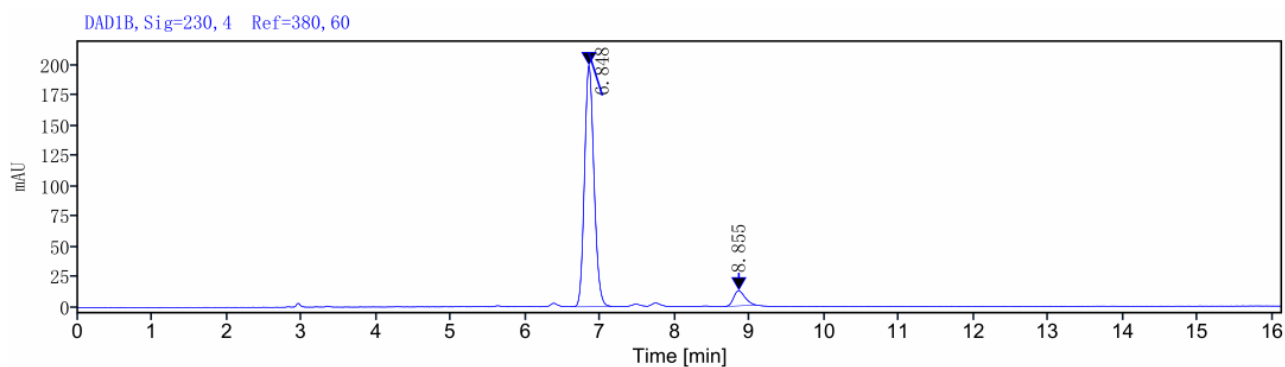

Signal: DAD1B, Sig=230, 4 Ref=380, 60

| RetTime [min] | Type | Width [min] | Area [mAU*s] | Height [mAU] | Area %  |
|---------------|------|-------------|--------------|--------------|---------|
| 6.848         | VV   | 0.49419     | 1763.46906   | 199.45028    | 93.0427 |
| 8.855         | VM m | 0.43063     | 131.86318    | 12.63707     | 6.9573  |
| Totals        |      |             | 1895.33224   |              |         |

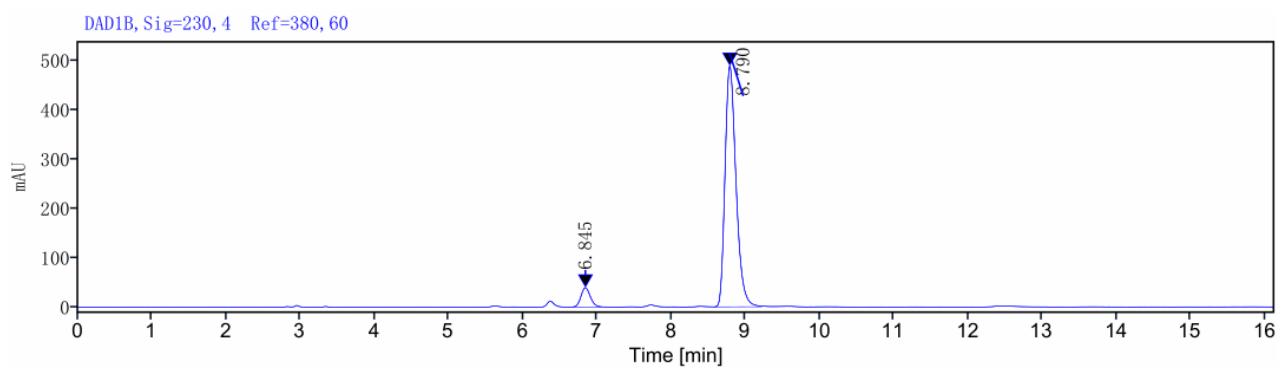

Signal: DAD1B, Sig=230, 4 Ref=380, 60

| RetTime [min] | Type | Width [min] | Area [mAU*s] | Height [mAU] | Area %  |
|---------------|------|-------------|--------------|--------------|---------|
| 6.845         | VV   | 0.36608     | 344.48634    | 39.32366     | 6.4378  |
| 8.790         | BV   | 0.63397     | 5006.49717   | 487.79384    | 93.5622 |
| Totals        |      |             | 5350.98351   |              |         |

Supplementary Fig. 110 HPLC data of 30.

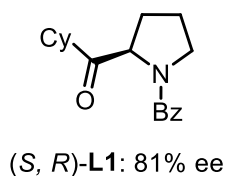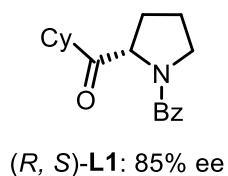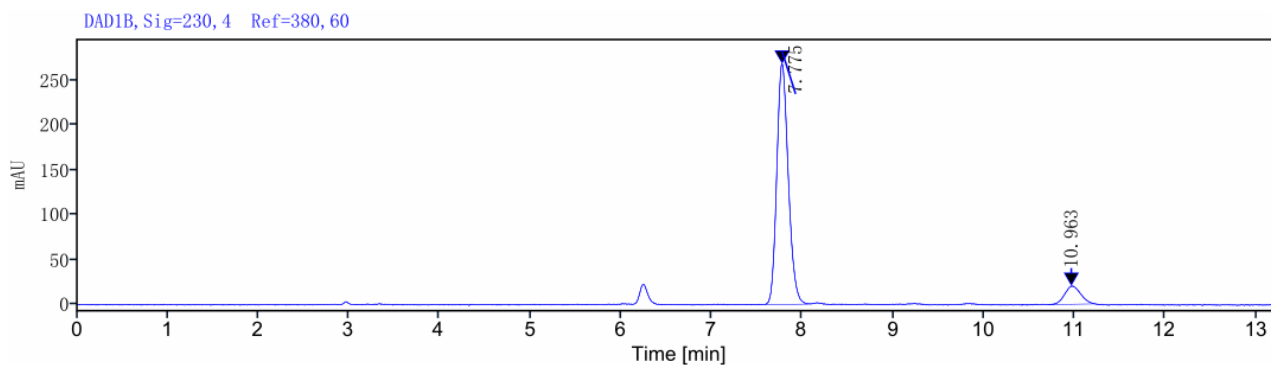

**Signal:** DAD1B, Sig=230, 4 Ref=380, 60

| RetTime [min] | Type | Width [min] | Area [mAU*s] | Height [mAU] | Area %  |
|---------------|------|-------------|--------------|--------------|---------|
| 7.775         | VB   | 0.46081     | 2367.60883   | 268.86470    | 90.4596 |
| 10.963        | MM m | 0.51809     | 249.70310    | 20.58129     | 9.5404  |
| Totals        |      |             | 2617.31194   |              |         |

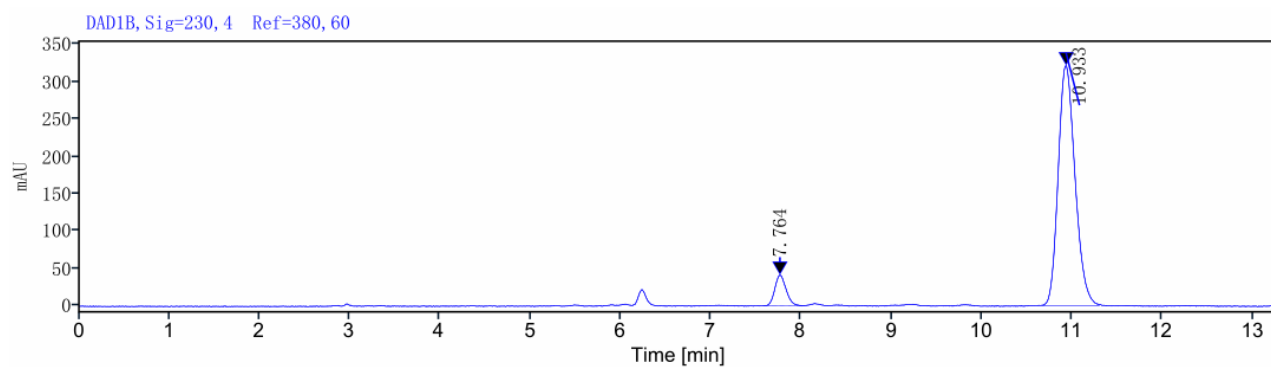

**Signal:** DAD1B, Sig=230, 4 Ref=380, 60

| RetTime [min] | Type | Width [min] | Area [mAU*s] | Height [mAU] | Area %  |
|---------------|------|-------------|--------------|--------------|---------|
| 7.764         | MM m | 0.46874     | 345.51462    | 41.08350     | 7.6845  |
| 10.933        | VV   | 0.62636     | 4150.73763   | 320.77381    | 92.3155 |
| Totals        |      |             | 4496.25226   |              |         |

Supplementary Fig. 111 HPLC data of 31.

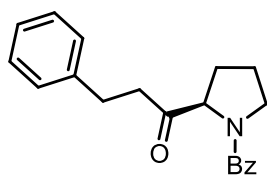

(S, R)-L1: 96% ee

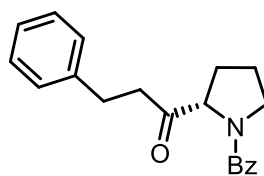

(R, S)-L1: 97% ee

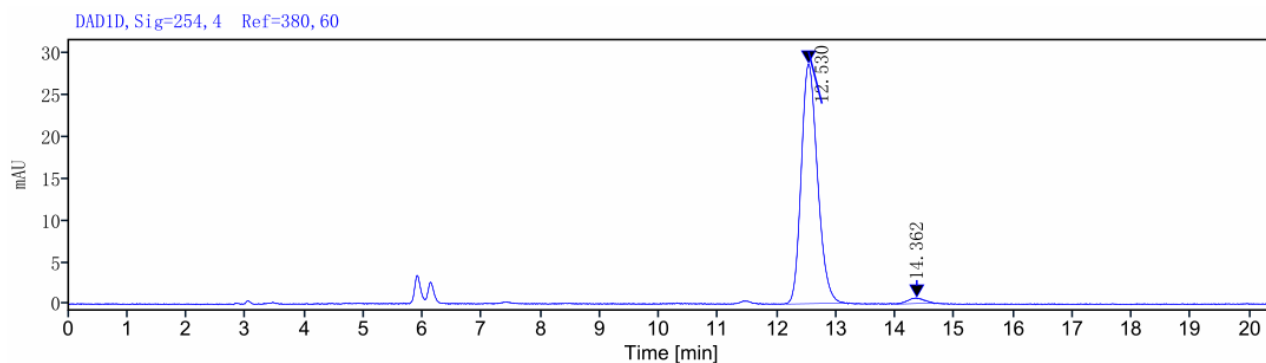

Signal: DAD1D, Sig=254, 4 Ref=380, 60

| RetTime [min] | Type | Width [min] | Area [mAU*s] | Height [mAU] | Area %  |
|---------------|------|-------------|--------------|--------------|---------|
| 12.530        | VM m | 1.02390     | 549.18363    | 28.73067     | 97.7729 |
| 14.362        | MM m | 0.70392     | 12.50952     | 0.68577      | 2.2271  |
| Totals        |      |             | 561.69315    |              |         |

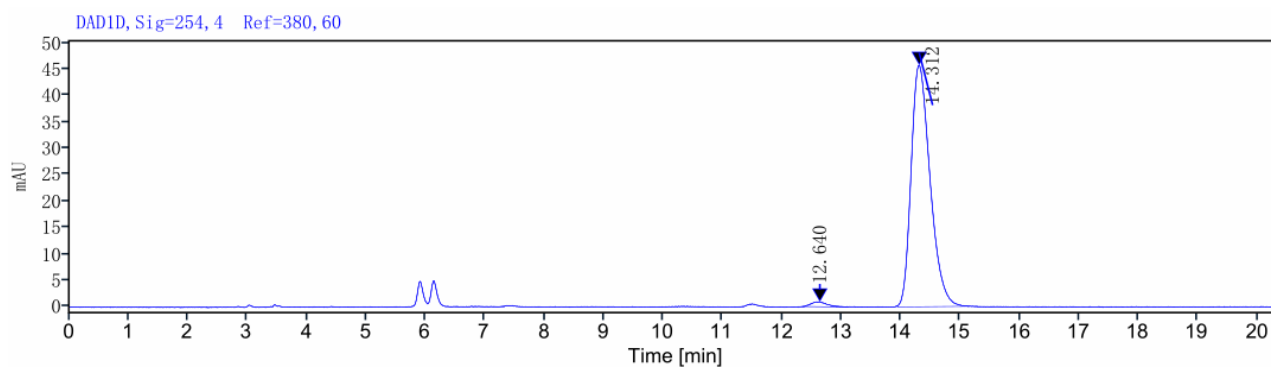

Signal: DAD1D, Sig=254, 4 Ref=380, 60

| RetTime [min] | Type | Width [min] | Area [mAU*s] | Height [mAU] | Area %  |
|---------------|------|-------------|--------------|--------------|---------|
| 12.640        | MM m | 0.76425     | 17.24428     | 0.94034      | 1.6672  |
| 14.312        | VM m | 1.22106     | 1017.05903   | 45.81104     | 98.3328 |
| Totals        |      |             | 1034.30331   |              |         |

Supplementary Fig. 112 HPLC data of 32.

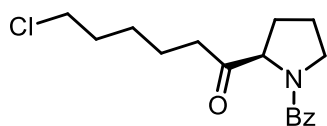

(*S, R*)-L1: 97% ee

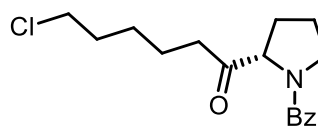

(*R, S*)-L1: 96% ee

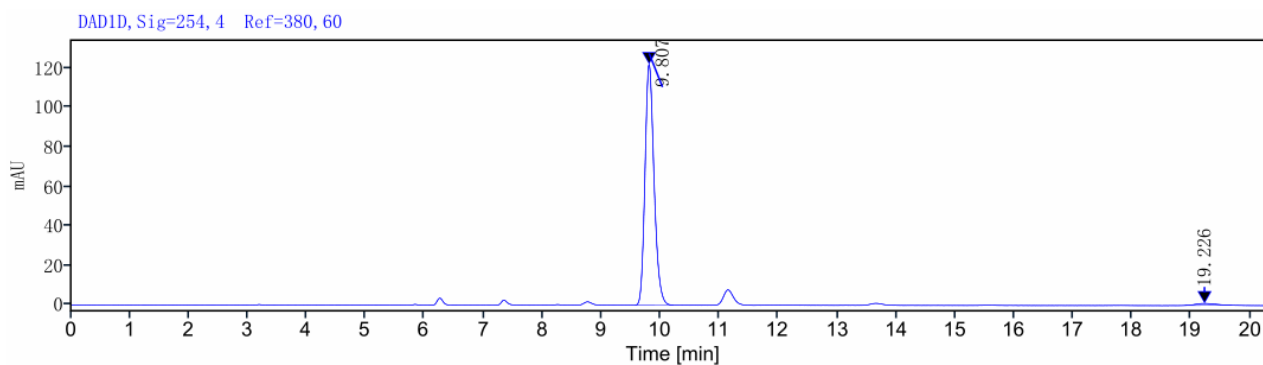

**Signal:** DAD1D, Sig=254, 4 Ref=380, 60

| RetTime [min] | Type | Width [min] | Area [mAU*s] | Height [mAU] | Area %  |
|---------------|------|-------------|--------------|--------------|---------|
| 9.807         | VV   | 0.63791     | 1304.98878   | 122.07805    | 98.2818 |
| 19.226        | MM m | 0.80128     | 22.81411     | 1.00421      | 1.7182  |
| Totals        |      |             | 1327.80289   |              |         |

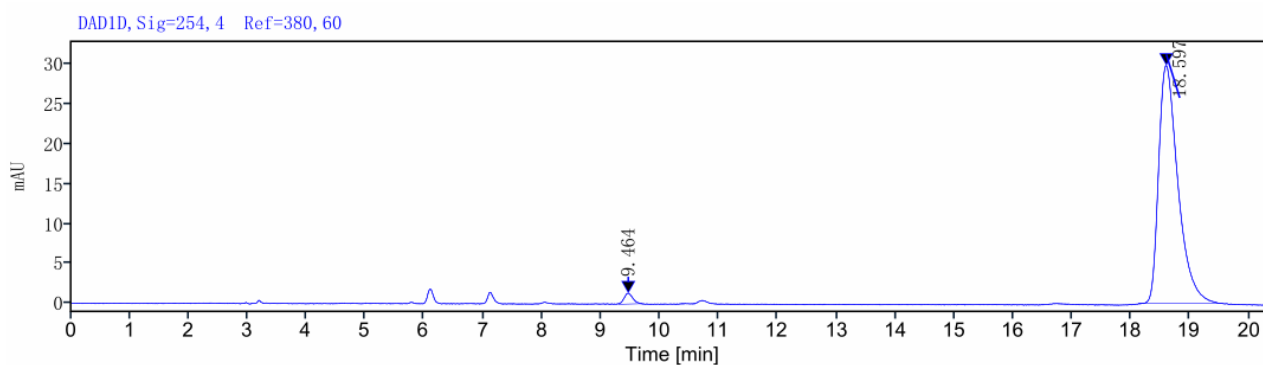

**Signal:** DAD1D, Sig=254, 4 Ref=380, 60

| RetTime [min] | Type | Width [min] | Area [mAU*s] | Height [mAU] | Area %  |
|---------------|------|-------------|--------------|--------------|---------|
| 9.464         | VM m | 0.40185     | 13.66942     | 1.36043      | 1.9669  |
| 18.597        | MM m | 1.42445     | 681.30845    | 29.89889     | 98.0331 |
| Totals        |      |             | 694.97787    |              |         |

Supplementary Fig. 113 HPLC data of 33.

Supplementary Fig. 114 HPLC data of 34.

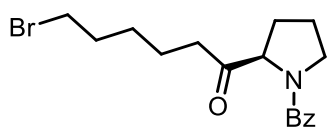

(*S*, *R*)-L1: 96% ee

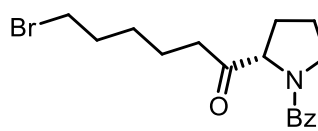

(*R*, *S*)-L1: 96% ee

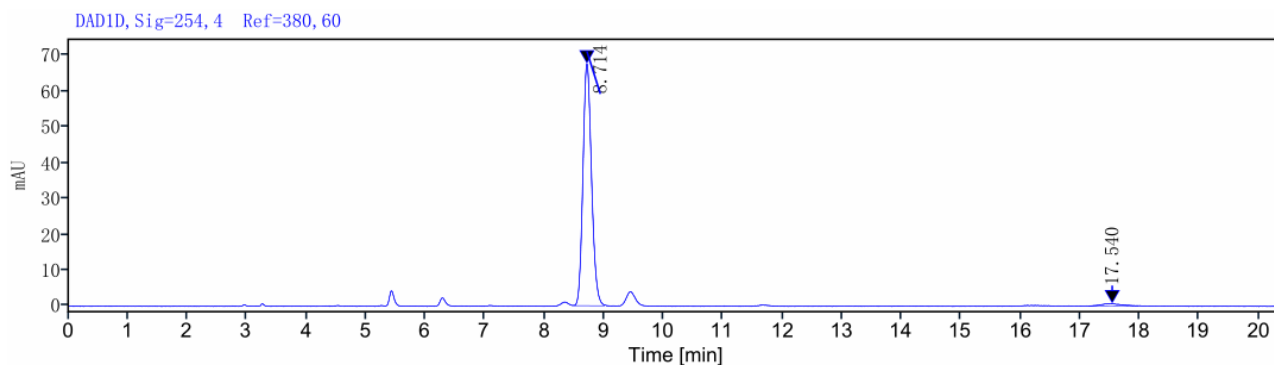

Signal: DAD1D, Sig=254, 4 Ref=380, 60

| RetTime<br>[min] | Type | Width<br>[min] | Area<br>[mAU*s] | Height<br>[mAU] | Area<br>% |
|------------------|------|----------------|-----------------|-----------------|-----------|
| 8.714            | VV   | 0.49550        | 676.57072       | 67.54477        | 97.9818   |
| 17.540           | MM m | 0.84473        | 13.93612        | 0.70084         | 2.0182    |
| Totals           |      |                | 690.50683       |                 |           |

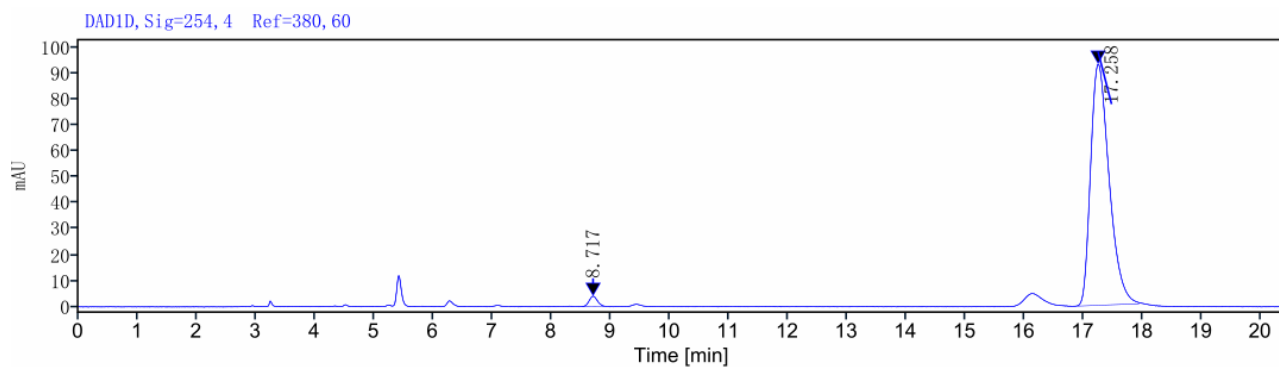

Signal: DAD1D, Sig=254, 4 Ref=380, 60

| RetTime<br>[min] | Type | Width<br>[min] | Area<br>[mAU*s] | Height<br>[mAU] | Area<br>% |
|------------------|------|----------------|-----------------|-----------------|-----------|
| 8.717            | BV   | 0.35232        | 40.00116        | 4.09344         | 1.9368    |
| 17.258           | VV   | 1.03740        | 2025.32609      | 93.09732        | 98.0632   |
| Totals           |      |                | 2065.32726      |                 |           |

Supplementary Fig. 114 HPLC data of 34.

Supplementary Fig. 115 HPLC data of 35.

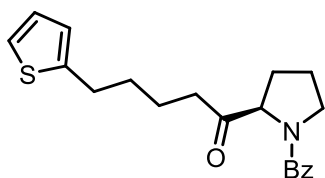

(*S*, *R*)-L1: 97% ee

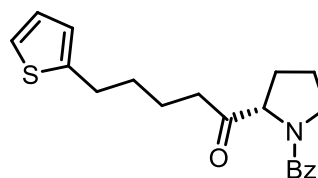

(*R*, *S*)-L1: 97% ee

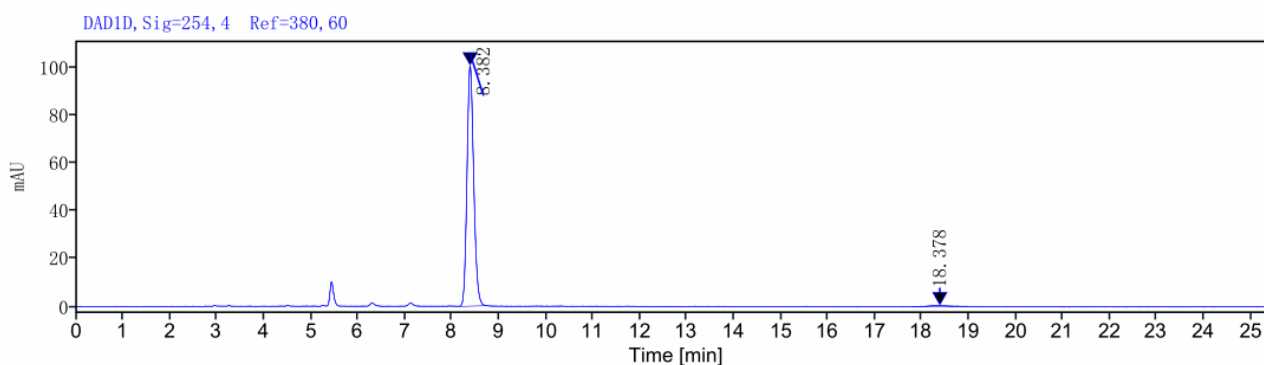

Signal: DAD1D, Sig=254, 4 Ref=380, 60

| RetTime [min] | Type | Width [min] | Area [mAU*s] | Height [mAU] | Area %  |
|---------------|------|-------------|--------------|--------------|---------|
| 8.382         | VM m | 0.56663     | 994.32686    | 100.64328    | 98.7112 |
| 18.378        | MM m | 1.18262     | 12.98222     | 0.48938      | 1.2888  |
| Totals        |      |             | 1007.30908   |              |         |

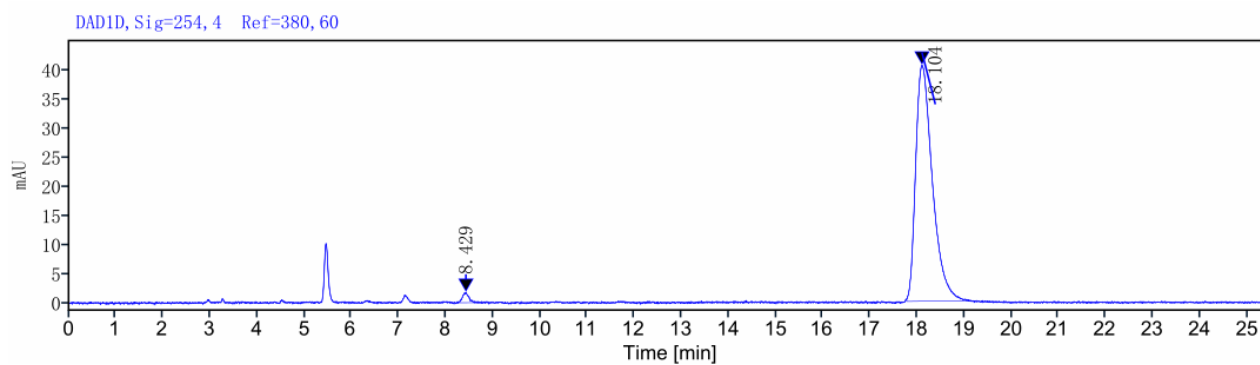

Signal: DAD1D, Sig=254, 4 Ref=380, 60

| RetTime [min] | Type | Width [min] | Area [mAU*s] | Height [mAU] | Area %  |
|---------------|------|-------------|--------------|--------------|---------|
| 8.429         | MM m | 0.45856     | 16.51513     | 1.86178      | 1.6352  |
| 18.104        | VM m | 1.33631     | 993.48399    | 40.42462     | 98.3648 |
| Totals        |      |             | 1009.99913   |              |         |

Supplementary Fig. 115 HPLC data of 35.

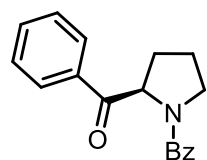

(S, R)-L2: 96% ee

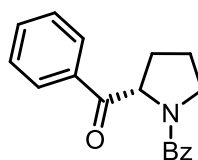

(R, S)-L2: 96% ee

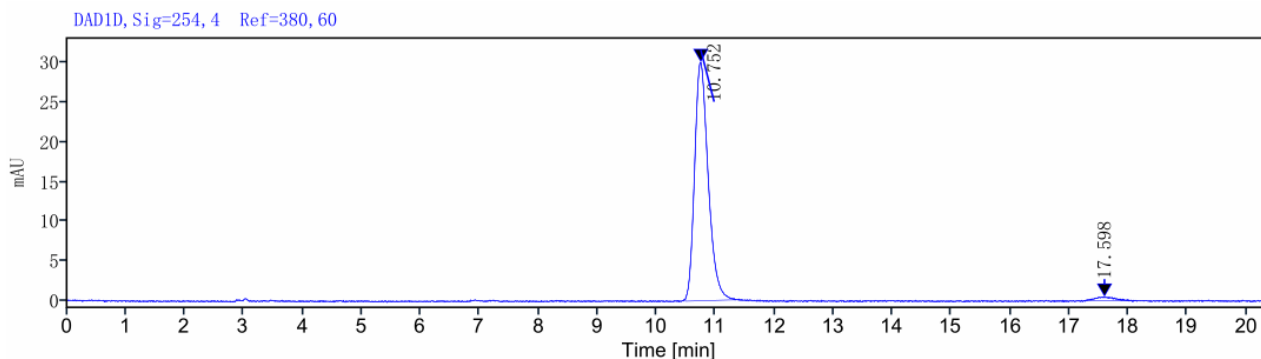

**Signal:** DAD1D, Sig=254, 4 Ref=380, 60

| RetTime<br>[min] | Type | Width<br>[min] | Area<br>[mAU*s] | Height<br>[mAU] | Area<br>% |
|------------------|------|----------------|-----------------|-----------------|-----------|
| 10.752           | VM m | 0.85327        | 482.59662       | 30.14648        | 97.7820   |
| 17.598           | MM m | 0.86884        | 10.94660        | 0.50110         | 2.2180    |
| Totals           |      |                | 493.54323       |                 |           |

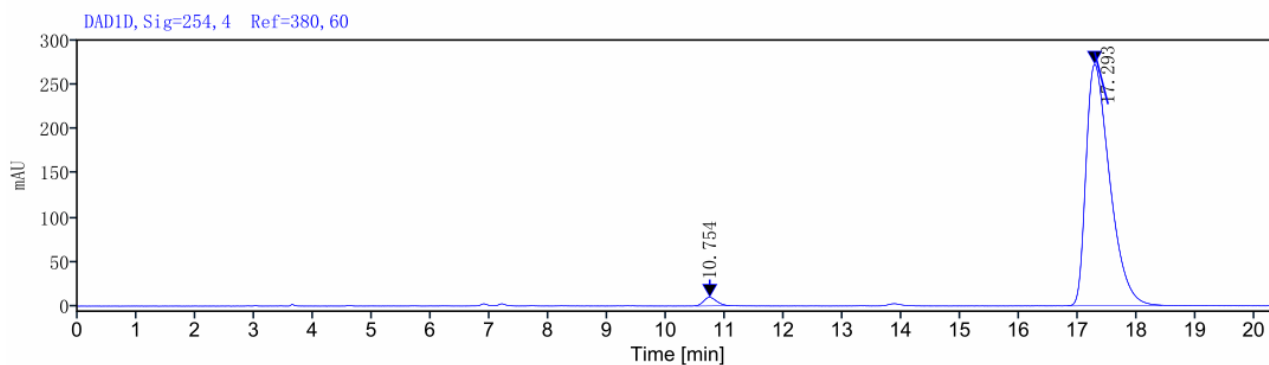

**Signal:** DAD1D, Sig=254, 4 Ref=380, 60

| RetTime<br>[min] | Type | Width<br>[min] | Area<br>[mAU*s] | Height<br>[mAU] | Area<br>% |
|------------------|------|----------------|-----------------|-----------------|-----------|
| 10.754           | VM m | 0.59643        | 150.07360       | 9.75568         | 1.9207    |
| 17.293           | BM m | 1.60708        | 7663.47998      | 273.35980       | 98.0793   |
| Totals           |      |                | 7813.55358      |                 |           |

Supplementary Fig. 116 HPLC data of 36.

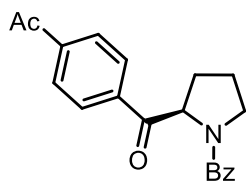

(S, R)-L2: 98% ee

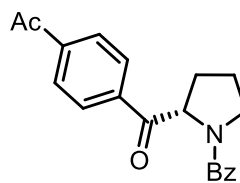

(R, S)-L2: 98% ee

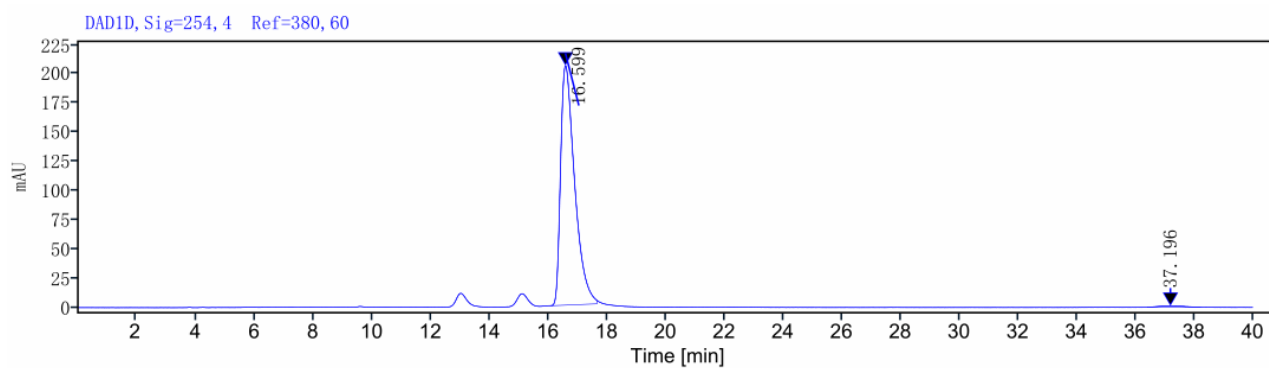

**Signal:** DAD1D, Sig=254, 4 Ref=380, 60

| RetTime [min] | Type | Width [min] | Area [mAU*s] | Height [mAU] | Area %  |
|---------------|------|-------------|--------------|--------------|---------|
| 16.599        | VV   | 1.54775     | 6816.08412   | 205.29648    | 99.0429 |
| 37.196        | MM m | 1.83423     | 65.86657     | 1.20273      | 0.9571  |
| Totals        |      |             | 6881.95069   |              |         |

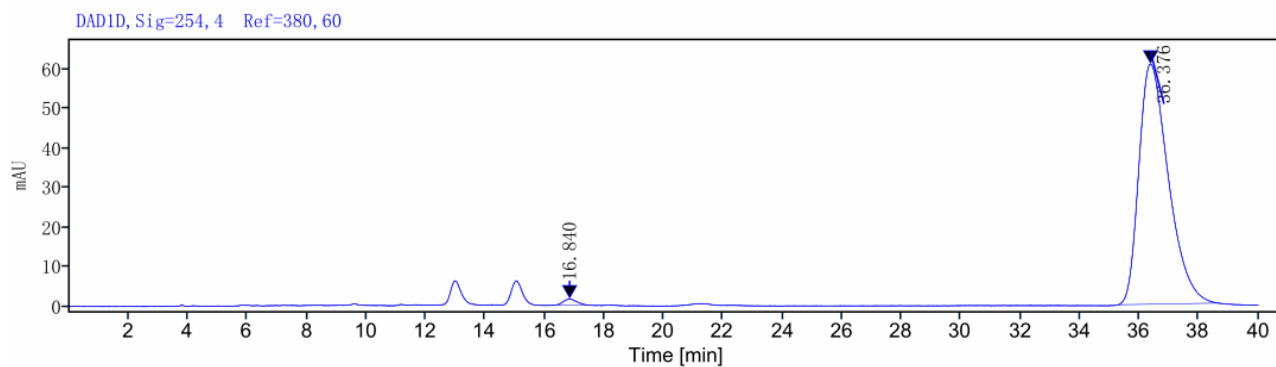

**Signal:** DAD1D, Sig=254, 4 Ref=380, 60

| RetTime [min] | Type | Width [min] | Area [mAU*s] | Height [mAU] | Area %  |
|---------------|------|-------------|--------------|--------------|---------|
| 16.840        | MM m | 1.09410     | 45.08716     | 1.60855      | 1.0661  |
| 36.376        | MM m | 3.37885     | 4184.14714   | 60.72781     | 98.9339 |
| Totals        |      |             | 4229.23430   |              |         |

Supplementary Fig. 117 HPLC data of 37.

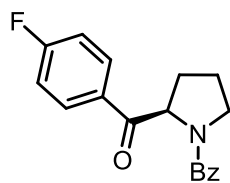

(S, R)-L2: 96% ee

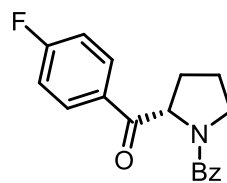

(R, S)-L2: 97% ee

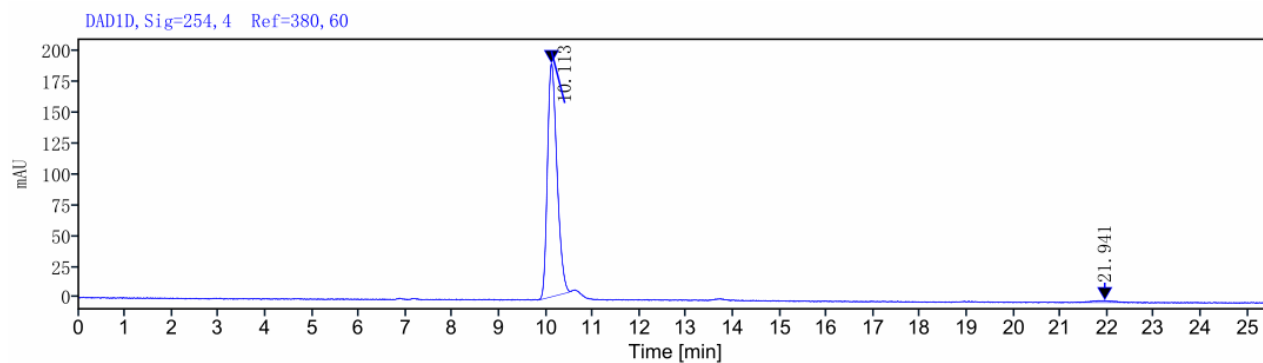

Signal: DAD1D, Sig=254, 4 Ref=380, 60

| RetTime [min] | Type | Width [min] | Area [mAU*s] | Height [mAU] | Area %  |
|---------------|------|-------------|--------------|--------------|---------|
| 10.113        | VV   | 0.63371     | 2690.48132   | 189.43929    | 98.1090 |
| 21.941        | MM m | 1.06083     | 51.85848     | 1.78839      | 1.8910  |
| Totals        |      |             | 2742.33980   |              |         |

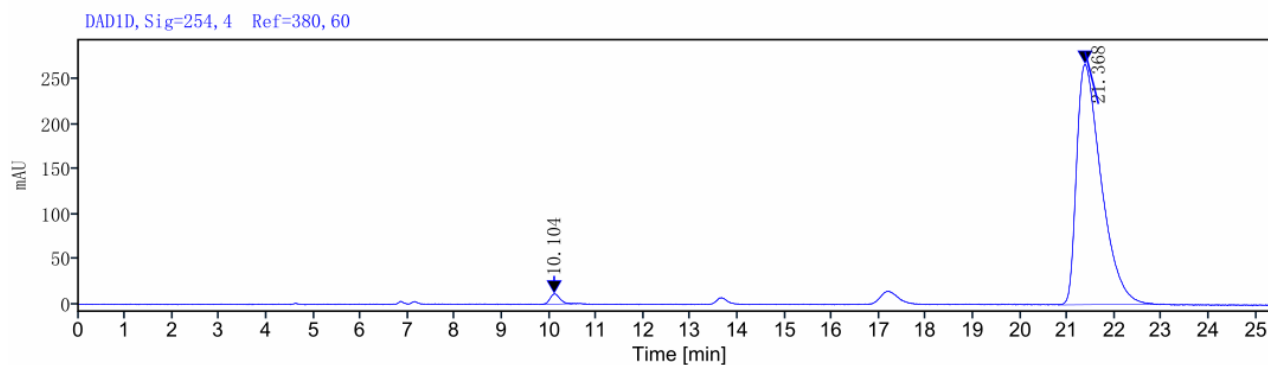

Signal: DAD1D, Sig=254, 4 Ref=380, 60

| RetTime [min] | Type | Width [min] | Area [mAU*s] | Height [mAU] | Area %  |
|---------------|------|-------------|--------------|--------------|---------|
| 10.104        | MM m | 0.69077     | 166.97333    | 11.74276     | 1.6893  |
| 21.368        | MM m | 2.12165     | 9717.01877   | 268.19721    | 98.3107 |
| Totals        |      |             | 9883.99211   |              |         |

Supplementary Fig. 118 HPLC data of 38.

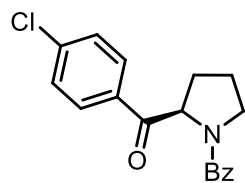

(S, R)-L2: 97% ee

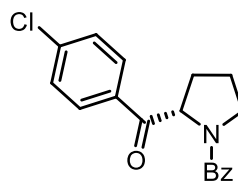

(R, S)-L2: 97% ee

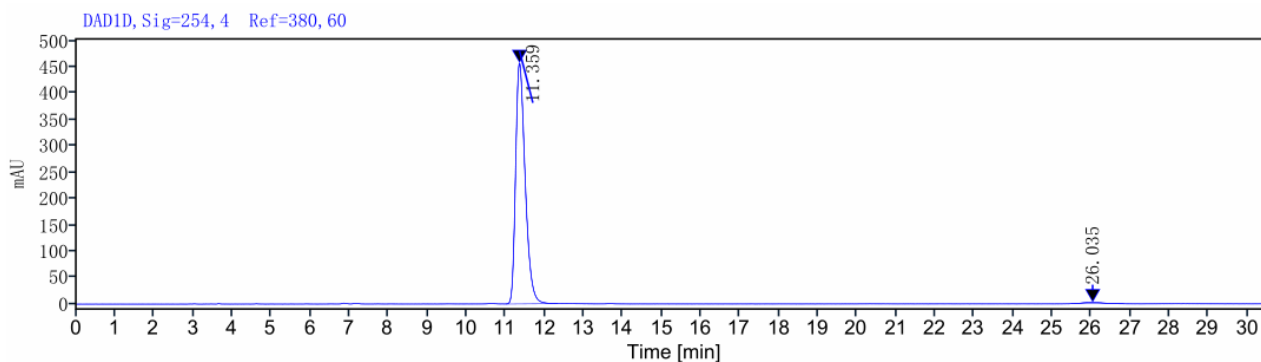

**Signal:** DAD1D, Sig=254, 4 Ref=380, 60

| RetTime [min] | Type | Width [min] | Area [mAU*s] | Height [mAU] | Area %  |
|---------------|------|-------------|--------------|--------------|---------|
| 11.359        | BM m | 1.32019     | 7788.64812   | 457.68220    | 98.6987 |
| 26.035        | MM m | 1.35154     | 102.69081    | 2.81060      | 1.3013  |
| Totals        |      |             | 7891.33893   |              |         |

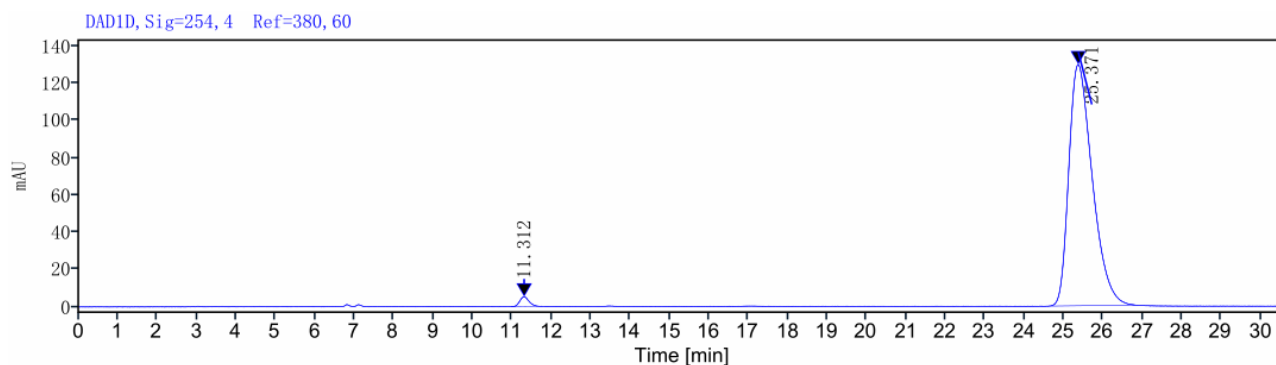

**Signal:** DAD1D, Sig=254, 4 Ref=380, 60

| RetTime [min] | Type | Width [min] | Area [mAU*s] | Height [mAU] | Area %  |
|---------------|------|-------------|--------------|--------------|---------|
| 11.312        | MM m | 0.64761     | 81.47725     | 5.18887      | 1.4967  |
| 25.371        | VM m | 2.11427     | 5362.34417   | 129.77239    | 98.5033 |
| Totals        |      |             | 5443.82141   |              |         |

Supplementary Fig. 119 HPLC data of 39.

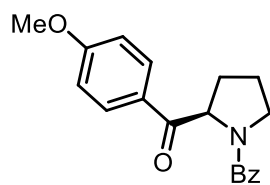

(S, R)-L2: 97% ee

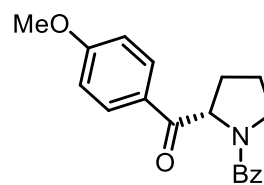

(R, S)-L2: 96% ee

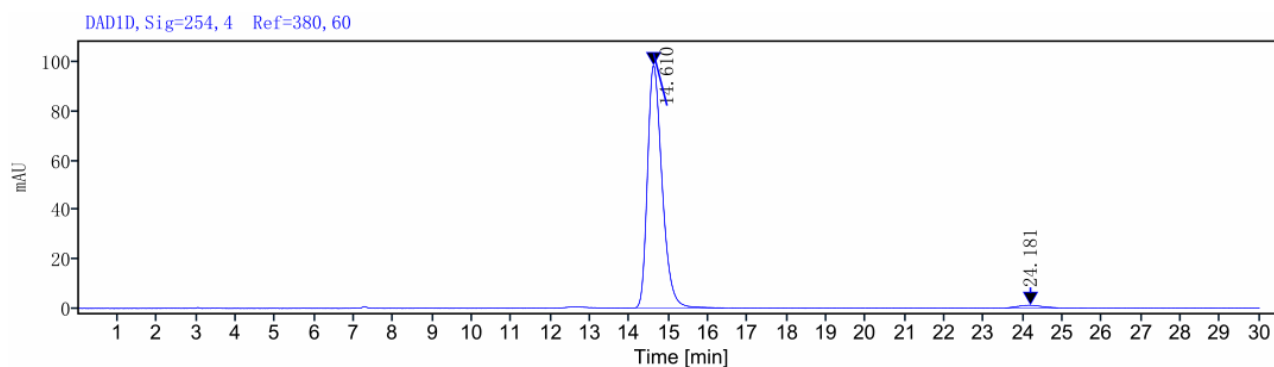

Signal: DAD1D, Sig=254, 4 Ref=380, 60

| RetTime [min] | Type | Width [min] | Area [mAU*s] | Height [mAU] | Area %  |
|---------------|------|-------------|--------------|--------------|---------|
| 14.610        | VM m | 2.21891     | 2549.28403   | 98.91125     | 98.3248 |
| 24.181        | MM m | 1.34371     | 43.43287     | 1.10879      | 1.6752  |
| Totals        |      |             | 2592.71690   |              |         |

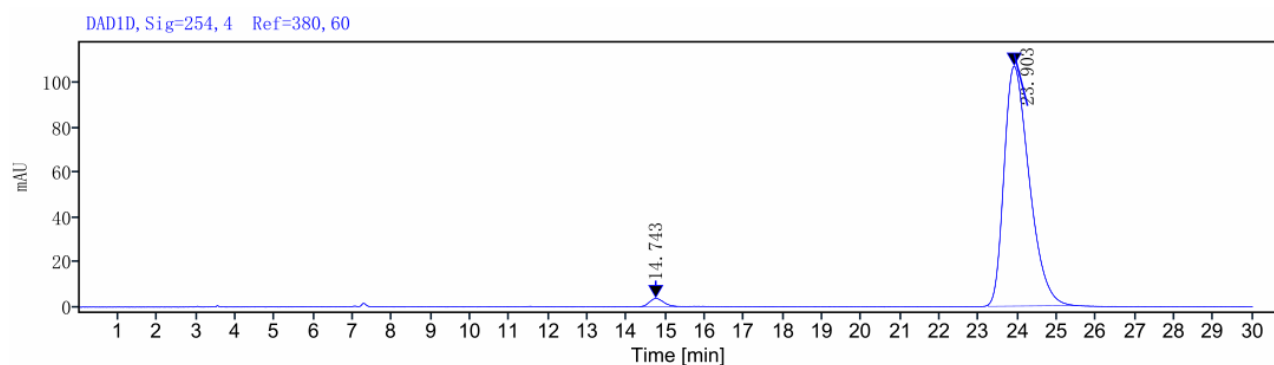

Signal: DAD1D, Sig=254, 4 Ref=380, 60

| RetTime [min] | Type | Width [min] | Area [mAU*s] | Height [mAU] | Area %  |
|---------------|------|-------------|--------------|--------------|---------|
| 14.743        | MM m | 0.96538     | 88.79961     | 3.67924      | 1.8177  |
| 23.903        | VM m | 2.29624     | 4796.57299   | 107.33720    | 98.1823 |
| Totals        |      |             | 4885.37259   |              |         |

Supplementary Fig. 120 HPLC data of 40.

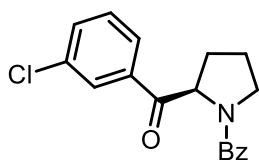

(*S, R*)-L2: 97% ee

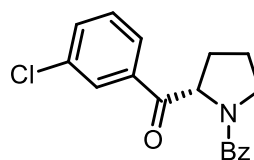

(*R, S*)-L2: 97% ee

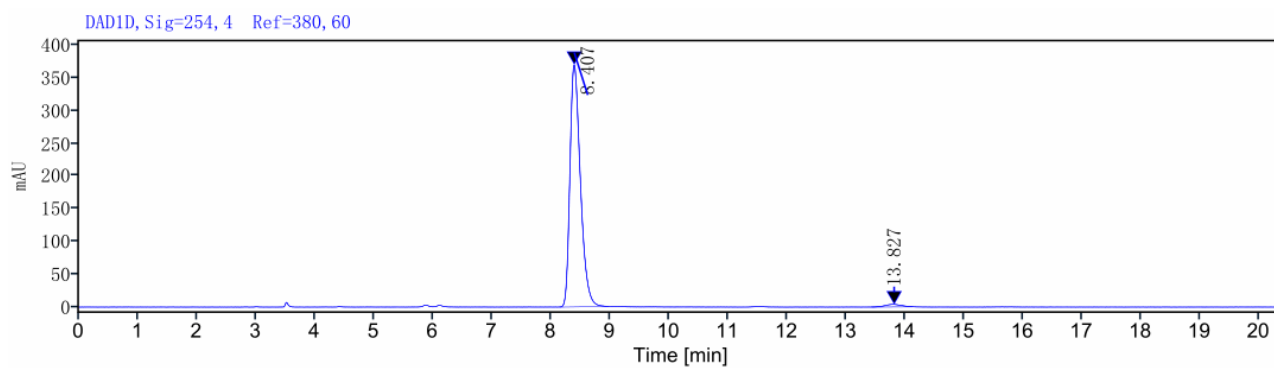

Signal: DAD1D, Sig=254, 4 Ref=380, 60

| RetTime [min] | Type | Width [min] | Area [mAU*s] | Height [mAU] | Area %  |
|---------------|------|-------------|--------------|--------------|---------|
| 8.407         | VM m | 0.82502     | 4554.08616   | 369.61203    | 98.4033 |
| 13.827        | MM m | 0.69992     | 73.89686     | 3.87288      | 1.5967  |
| Totals        |      |             | 4627.98303   |              |         |

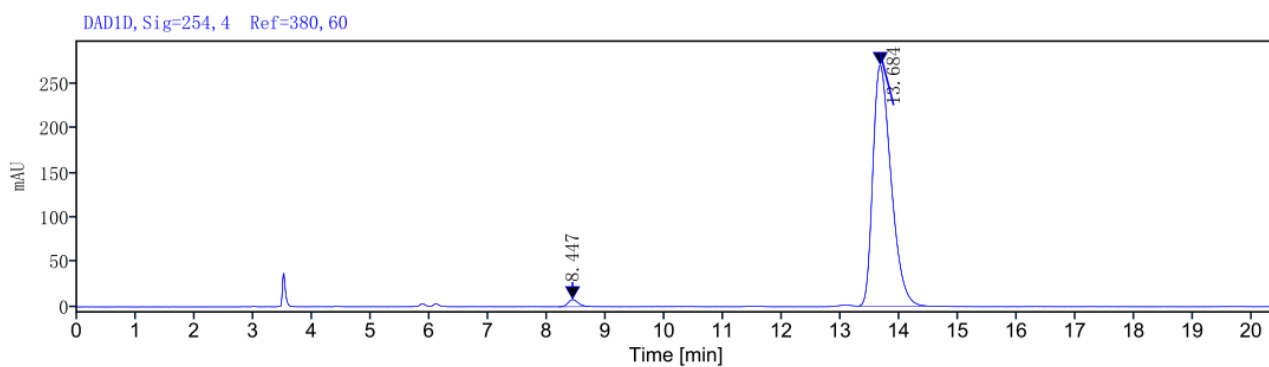

Signal: DAD1D, Sig=254, 4 Ref=380, 60

| RetTime [min] | Type | Width [min] | Area [mAU*s] | Height [mAU] | Area %  |
|---------------|------|-------------|--------------|--------------|---------|
| 8.447         | MM m | 0.53096     | 95.40458     | 8.04617      | 1.6149  |
| 13.684        | VV   | 1.13962     | 5812.28794   | 270.11958    | 98.3851 |
| Totals        |      |             | 5907.69252   |              |         |

Supplementary Fig. 121 HPLC data of 41.

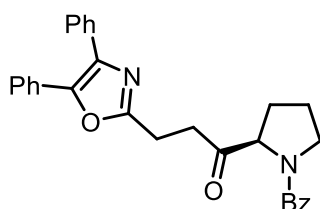

(*S, R*)-L1: 99% ee

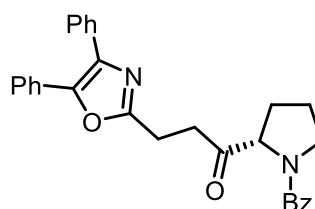

(*R, S*)-L1: 98% ee

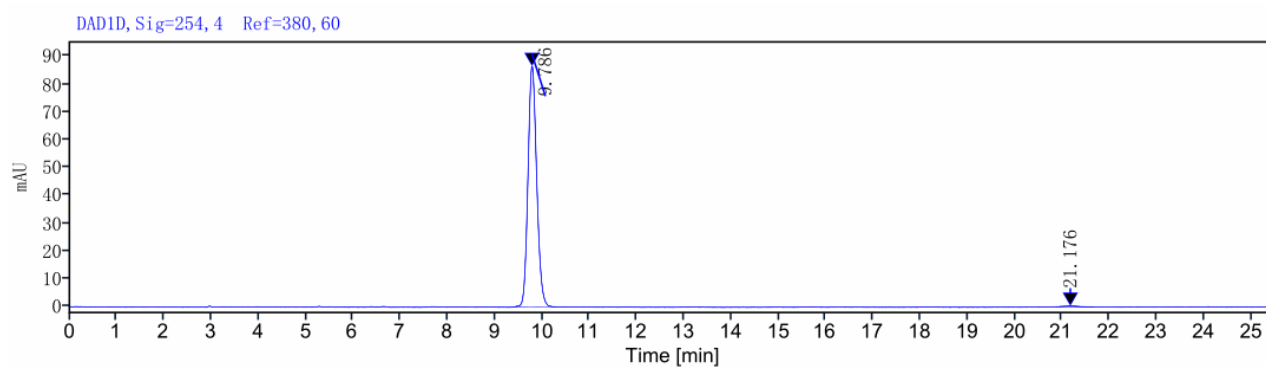

Signal: DAD1D, Sig=254, 4 Ref=380, 60

| RetTime [min] | Type | Width [min] | Area [mAU*s] | Height [mAU] | Area %  |
|---------------|------|-------------|--------------|--------------|---------|
| 9.786         | MM m | 0.91714     | 1105.52689   | 86.62842     | 99.3146 |
| 21.176        | MM m | 0.79646     | 7.62917      | 0.40497      | 0.6854  |
| Totals        |      |             | 1113.15606   |              |         |

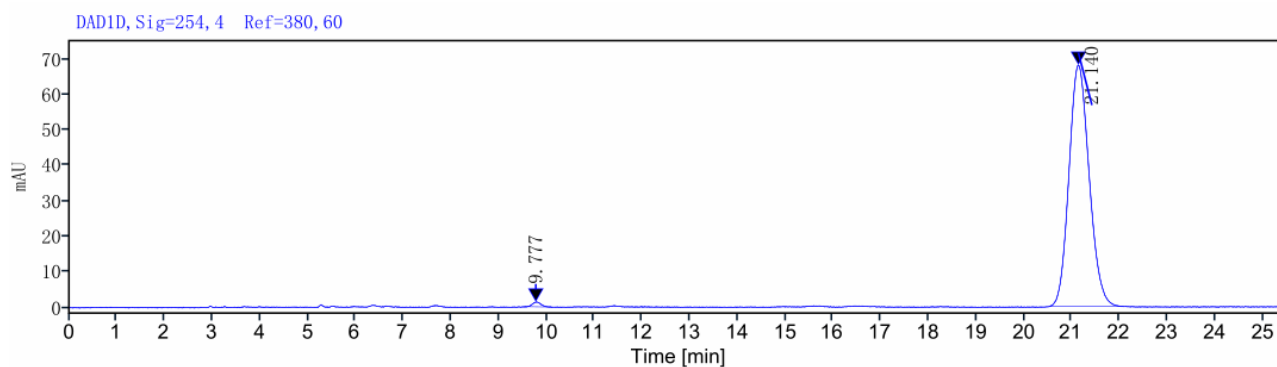

Signal: DAD1D, Sig=254, 4 Ref=380, 60

| RetTime [min] | Type | Width [min] | Area [mAU*s] | Height [mAU] | Area %  |
|---------------|------|-------------|--------------|--------------|---------|
| 9.777         | MM m | 0.57924     | 15.94481     | 1.40743      | 0.7924  |
| 21.140        | MM m | 1.54465     | 1996.38834   | 67.96316     | 99.2076 |
| Totals        |      |             | 2012.33315   |              |         |

Supplementary Fig. 122 HPLC data of 42.

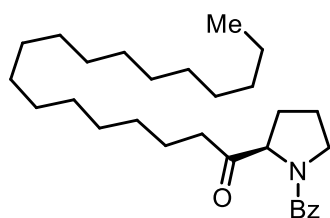

(*S, R*)-L1: 94% ee

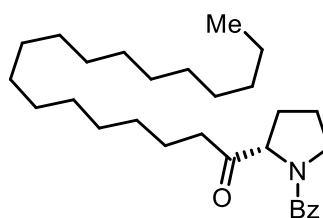

(*R, S*)-L1: 92% ee

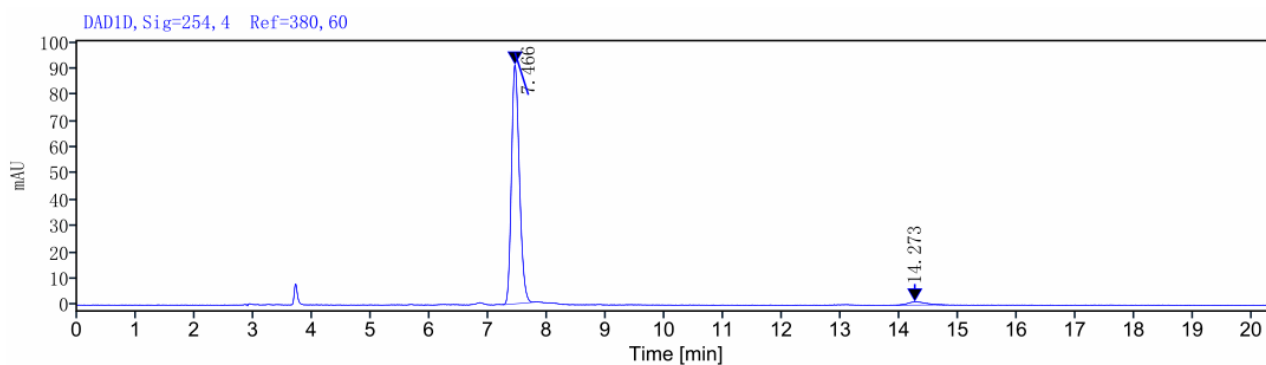

**Signal:** DAD1D, Sig=254, 4 Ref=380, 60

| RetTime<br>[min] | Type | Width<br>[min] | Area<br>[mAU*s] | Height<br>[mAU] | Area<br>% |
|------------------|------|----------------|-----------------|-----------------|-----------|
| 7.466            | BV   | 0.48816        | 853.21477       | 91.10440        | 97.1579   |
| 14.273           | MM m | 0.82508        | 24.95824        | 1.26856         | 2.8421    |
| Totals           |      |                | 878.17301       |                 |           |

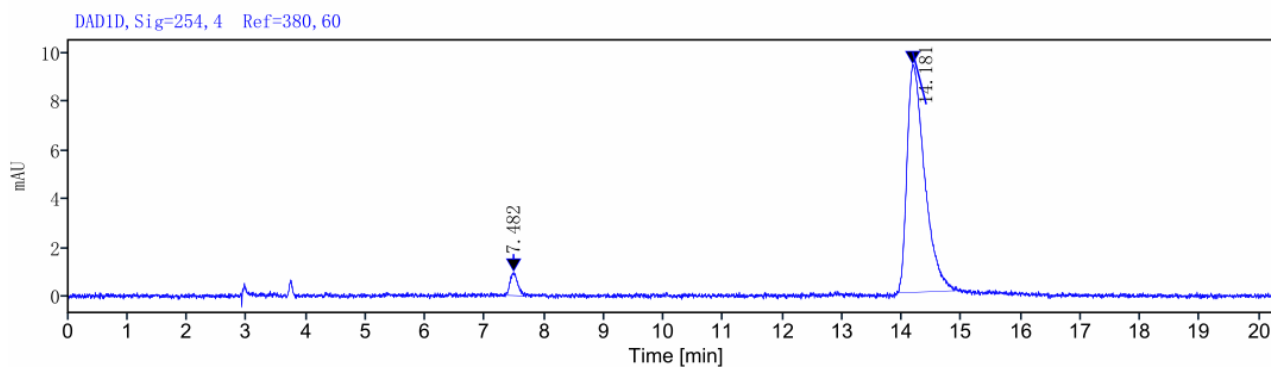

**Signal:** DAD1D, Sig=254, 4 Ref=380, 60

| RetTime<br>[min] | Type | Width<br>[min] | Area<br>[mAU*s] | Height<br>[mAU] | Area<br>% |
|------------------|------|----------------|-----------------|-----------------|-----------|
| 7.482            | MM m | 0.36304        | 8.50605         | 0.97334         | 4.2283    |
| 14.181           | VM m | 0.99038        | 192.66292       | 9.36685         | 95.7717   |
| Totals           |      |                | 201.16897       |                 |           |

Supplementary Fig. 123 HPLC data of 43.

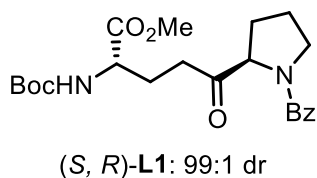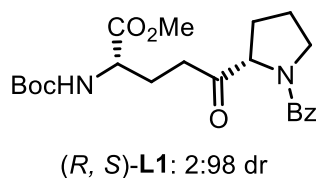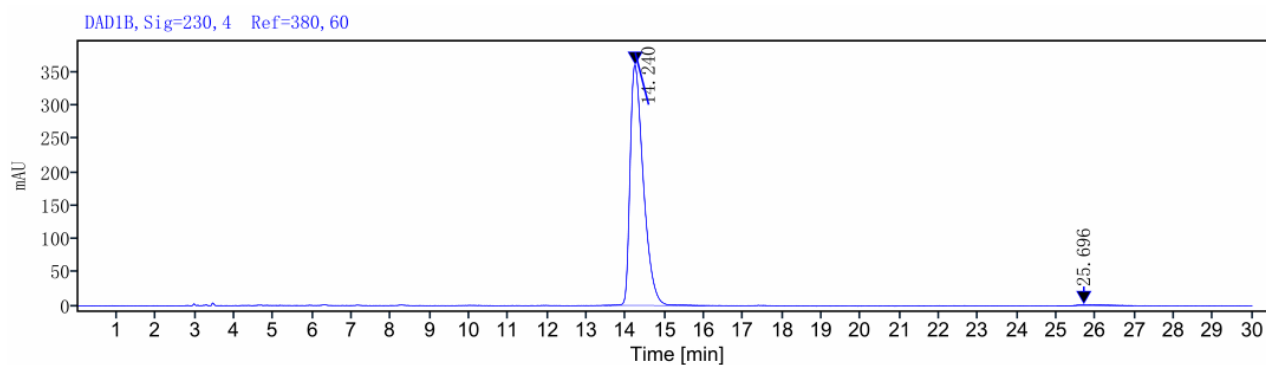

**Signal:** DAD1B, Sig=230, 4 Ref=380, 60

| RetTime<br>[min] | Type | Width<br>[min] | Area<br>[mAU*s] | Height<br>[mAU] | Area<br>% |
|------------------|------|----------------|-----------------|-----------------|-----------|
| 14.240           | MM m | 2.59252        | 8454.43703      | 359.92132       | 98.9379   |
| 25.696           | MM m | 1.95762        | 90.76034        | 2.44789         | 1.0621    |
| Totals           |      |                | 8545.19736      |                 |           |

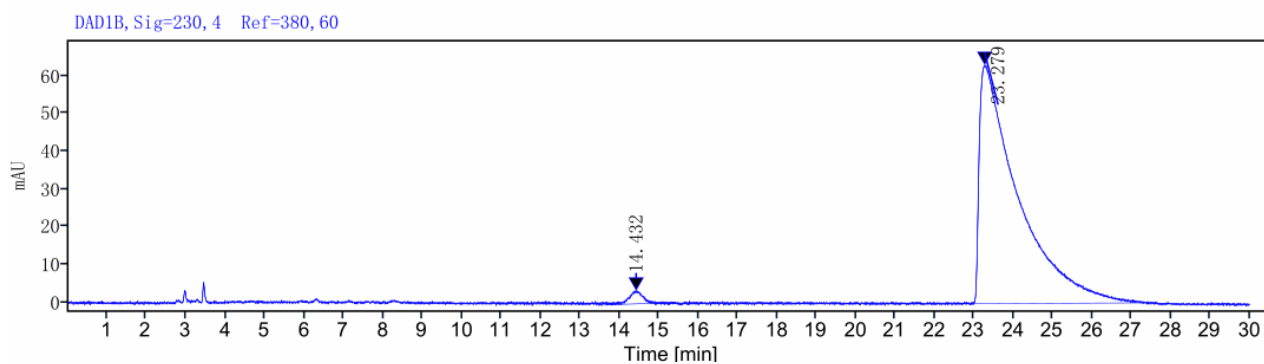

**Signal:** DAD1B, Sig=230, 4 Ref=380, 60

| RetTime<br>[min] | Type | Width<br>[min] | Area<br>[mAU*s] | Height<br>[mAU] | Area<br>% |
|------------------|------|----------------|-----------------|-----------------|-----------|
| 14.432           | MM m | 1.71953        | 82.36731        | 3.47274         | 1.8839    |
| 23.279           | MM m | 4.52368        | 4289.69539      | 63.13946        | 98.1161   |
| Totals           |      |                | 4372.06270      |                 |           |

Supplementary Fig. 124 HPLC data of 44 and 45.

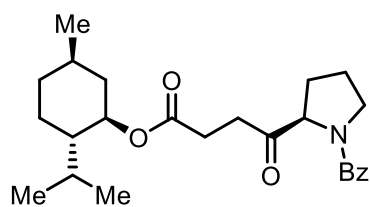

(S, R)-L1: 98:2 dr

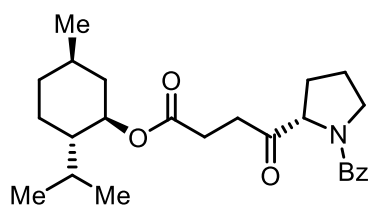

(R, S)-L1: 2:98 dr

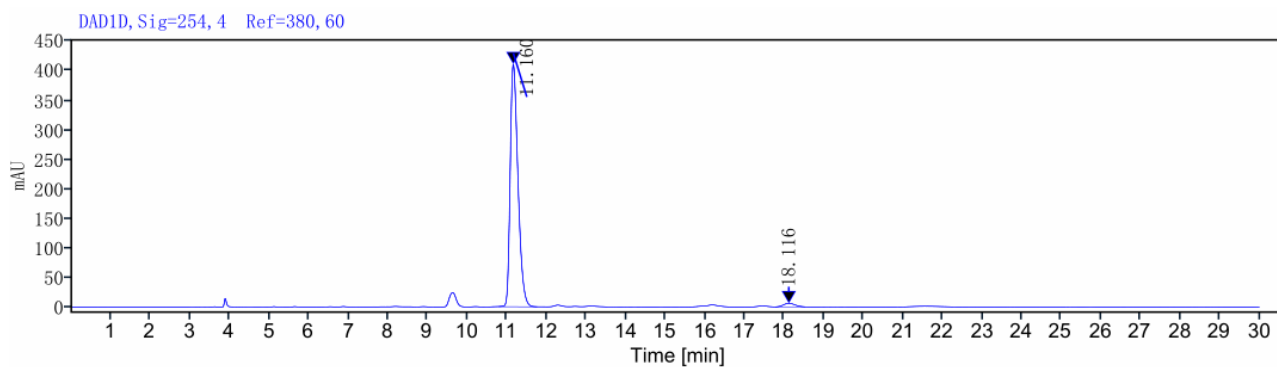

**Signal:** DAD1D, Sig=254, 4 Ref=380, 60

| RetTime<br>[min] | Type | Width<br>[min] | Area<br>[mAU*s] | Height<br>[mAU] | Area<br>% |
|------------------|------|----------------|-----------------|-----------------|-----------|
| 11.160           | VV   | 0.95853        | 5598.61851      | 410.81647       | 97.8161   |
| 18.116           | BV   | 0.74961        | 124.99985       | 6.11826         | 2.1839    |
| Totals           |      |                | 5723.61836      |                 |           |

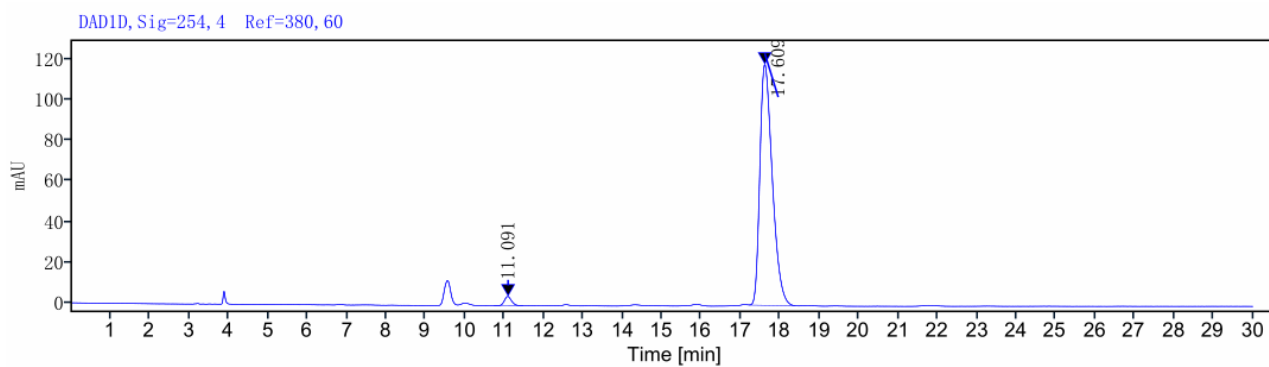

**Signal:** DAD1D, Sig=254, 4 Ref=380, 60

| RetTime<br>[min] | Type | Width<br>[min] | Area<br>[mAU*s] | Height<br>[mAU] | Area<br>% |
|------------------|------|----------------|-----------------|-----------------|-----------|
| 11.091           | MM m | 0.74811        | 56.69769        | 4.58086         | 2.1231    |
| 17.609           | BV   | 1.16462        | 2613.80501      | 119.15707       | 97.8769   |
| Totals           |      |                | 2670.50271      |                 |           |

Supplementary Fig. 125 HPLC data of 46 and 47.

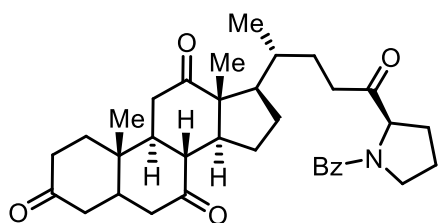

(S, R)-L1: 98:2 dr

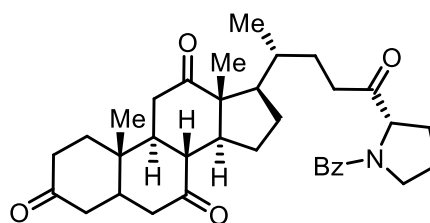

(R, S)-L1: 3:97 dr

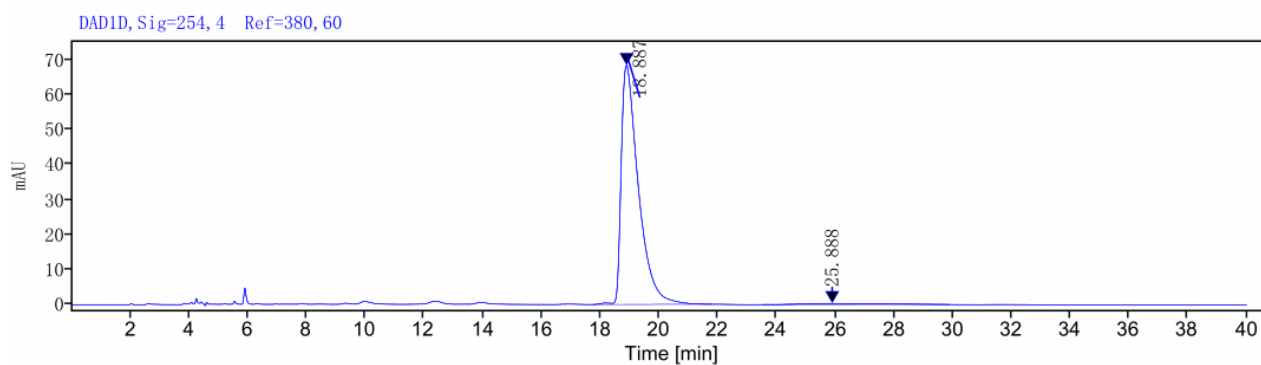

**Signal:** DAD1D, Sig=254, 4 Ref=380, 60

| RetTime [min] | Type | Width [min] | Area [mAU*s] | Height [mAU] | Area %  |
|---------------|------|-------------|--------------|--------------|---------|
| 18.887        | MM m | 4.02319     | 2774.18992   | 68.32968     | 98.2994 |
| 25.888        | MM m | 6.35066     | 47.99490     | 0.34877      | 1.7006  |
| Totals        |      |             | 2822.18482   |              |         |

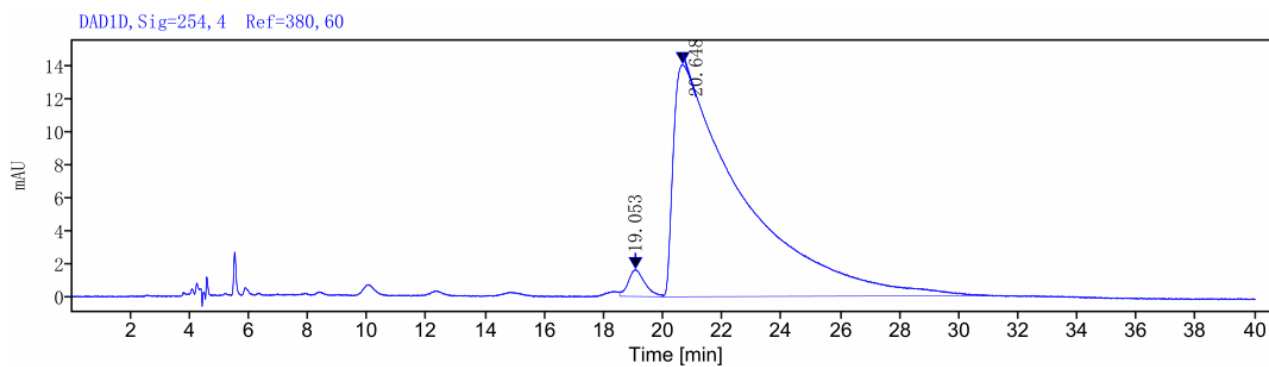

**Signal:** DAD1D, Sig=254, 4 Ref=380, 60

| RetTime [min] | Type | Width [min] | Area [mAU*s] | Height [mAU] | Area %  |
|---------------|------|-------------|--------------|--------------|---------|
| 19.053        | MM m | 1.46298     | 63.42910     | 1.64960      | 2.6969  |
| 20.648        | MM m | 10.90584    | 2288.53086   | 14.15401     | 97.3031 |
| Totals        |      |             | 2351.95996   |              |         |

Supplementary Fig. 126 HPLC data of 48 and 49.

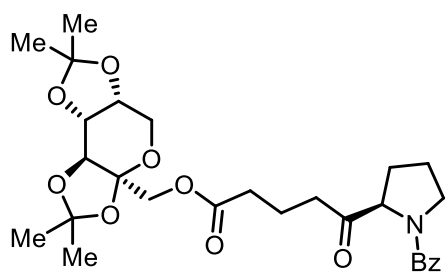

(*S, R*)-L1: 97:3 dr

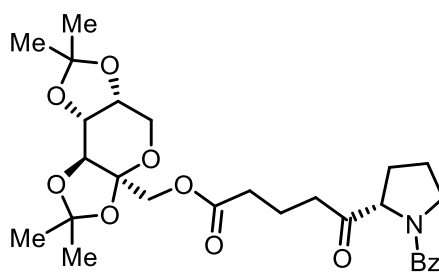

(*R, S*)-L1: 2:98 dr

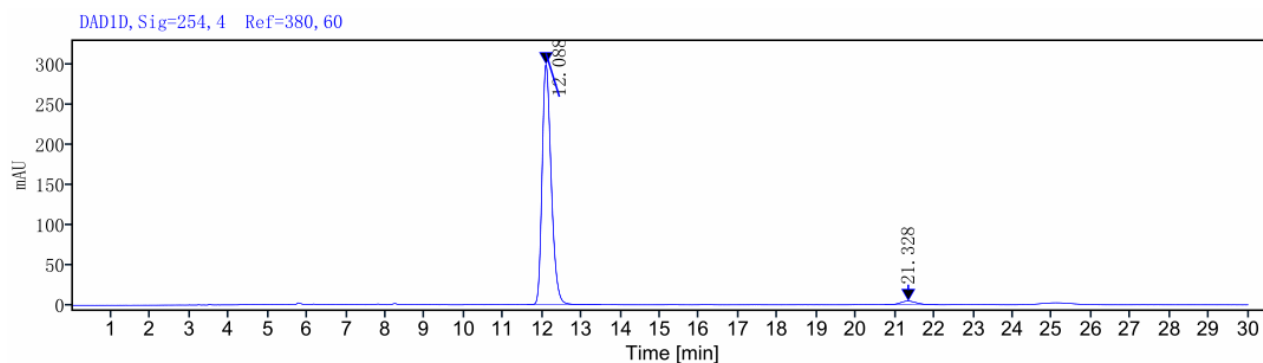

**Signal:** DAD1D, Sig=254, 4 Ref=380, 60

| RetTime<br>[min] | Type | Width<br>[min] | Area<br>[mAU*s] | Height<br>[mAU] | Area<br>% |
|------------------|------|----------------|-----------------|-----------------|-----------|
| 12.088           | MM m | 1.89521        | 4844.25806      | 300.02346       | 97.3399   |
| 21.328           | MM m | 1.37153        | 132.38181       | 4.60519         | 2.6601    |
| Totals           |      |                | 4976.63987      |                 |           |

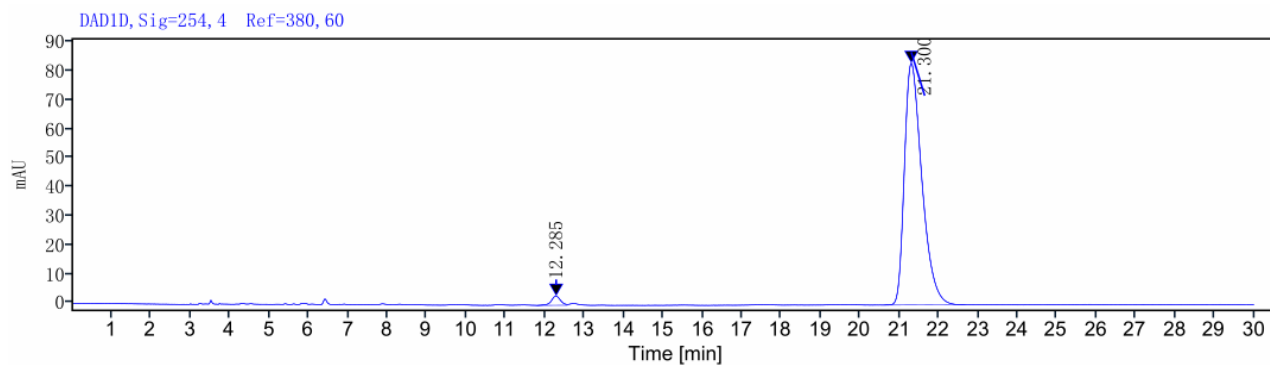

**Signal:** DAD1D, Sig=254, 4 Ref=380, 60

| RetTime<br>[min] | Type | Width<br>[min] | Area<br>[mAU*s] | Height<br>[mAU] | Area<br>% |
|------------------|------|----------------|-----------------|-----------------|-----------|
| 12.285           | MM m | 0.77305        | 51.72620        | 3.20930         | 1.9739    |
| 21.300           | MM m | 2.04483        | 2568.78675      | 83.46187        | 98.0261   |
| Totals           |      |                | 2620.51295      |                 |           |

**Supplementary Fig. 127** HPLC data of 50 and 51.

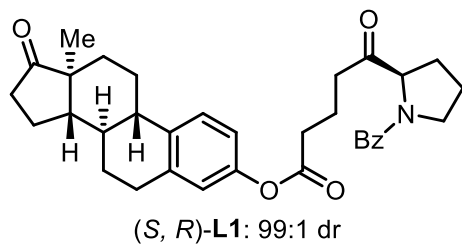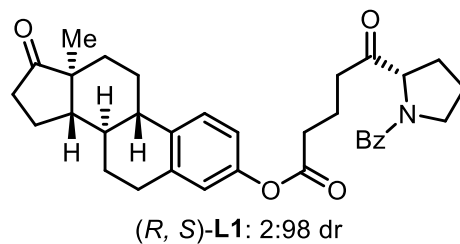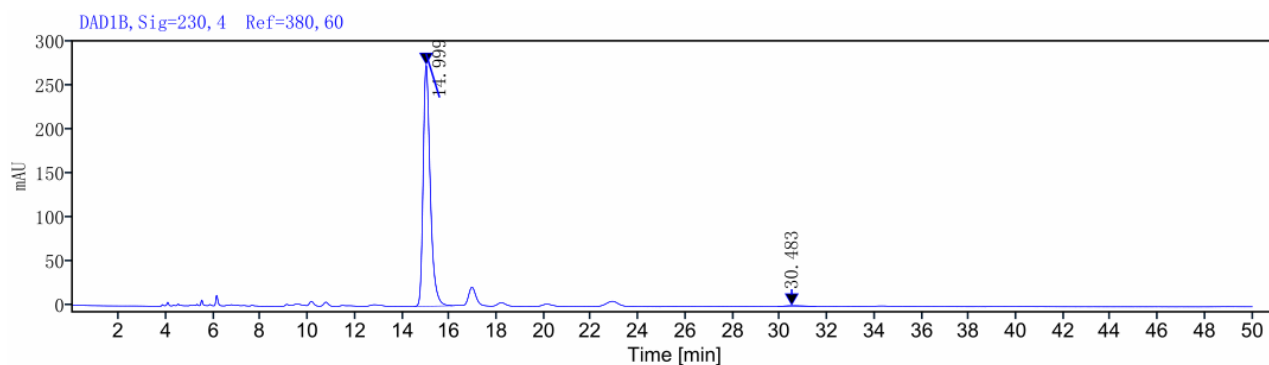

**Signal:** DAD1B, Sig=230, 4 Ref=380, 60

| RetTime<br>[min] | Type | Width<br>[min] | Area<br>[mAU*s] | Height<br>[mAU] | Area<br>% |
|------------------|------|----------------|-----------------|-----------------|-----------|
| 14.999           | BV   | 1.60905        | 5743.18656      | 274.64099       | 99.3091   |
| 30.483           | MM m | 1.63815        | 39.95544        | 0.80938         | 0.6909    |
| Totals           |      |                | 5783.14200      |                 |           |

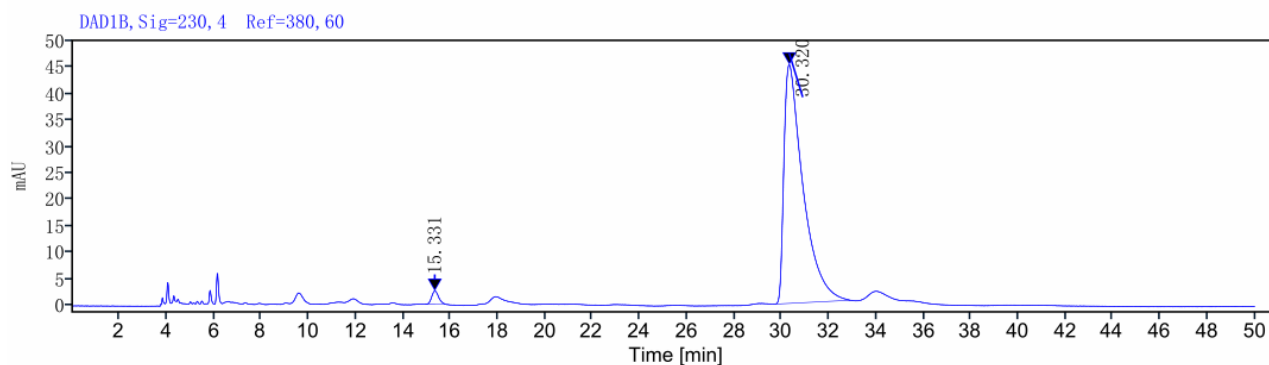

**Signal:** DAD1B, Sig=230, 4 Ref=380, 60

| RetTime<br>[min] | Type | Width<br>[min] | Area<br>[mAU*s] | Height<br>[mAU] | Area<br>% |
|------------------|------|----------------|-----------------|-----------------|-----------|
| 15.331           | MM m | 0.85469        | 49.87604        | 2.48786         | 1.9366    |
| 30.320           | VM m | 3.12583        | 2525.54007      | 45.04071        | 98.0634   |
| Totals           |      |                | 2575.41611      |                 |           |

**Supplementary Fig. 128** HPLC data of 52 and 53.

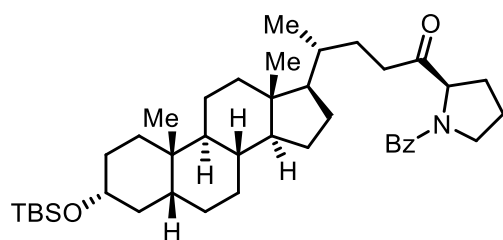

(*S, R*)-L1: 96:4 dr

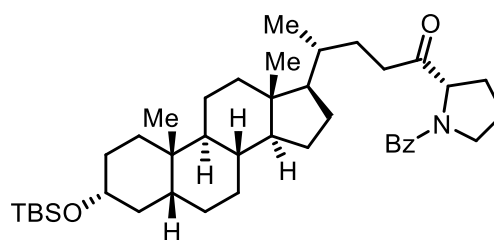

(*R, S*)-L1: 3:97 dr

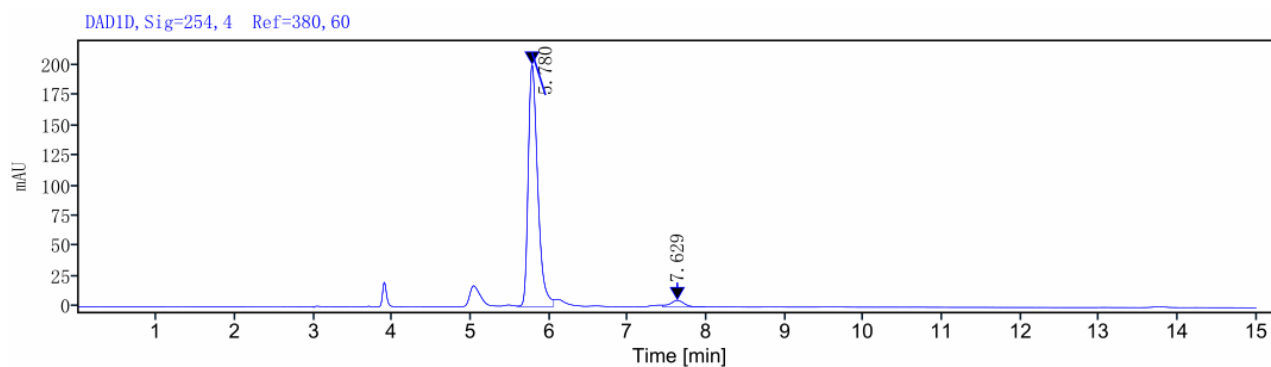

**Signal:** DAD1D, Sig=254, 4 Ref=380, 60

| RetTime [min] | Type | Width [min] | Area [mAU*s] | Height [mAU] | Area %  |
|---------------|------|-------------|--------------|--------------|---------|
| 5.780         | VV   | 0.45887     | 1680.31053   | 200.10338    | 96.1278 |
| 7.629         | VB   | 0.54751     | 67.68611     | 5.48072      | 3.8722  |
| Totals        |      |             | 1747.99664   |              |         |

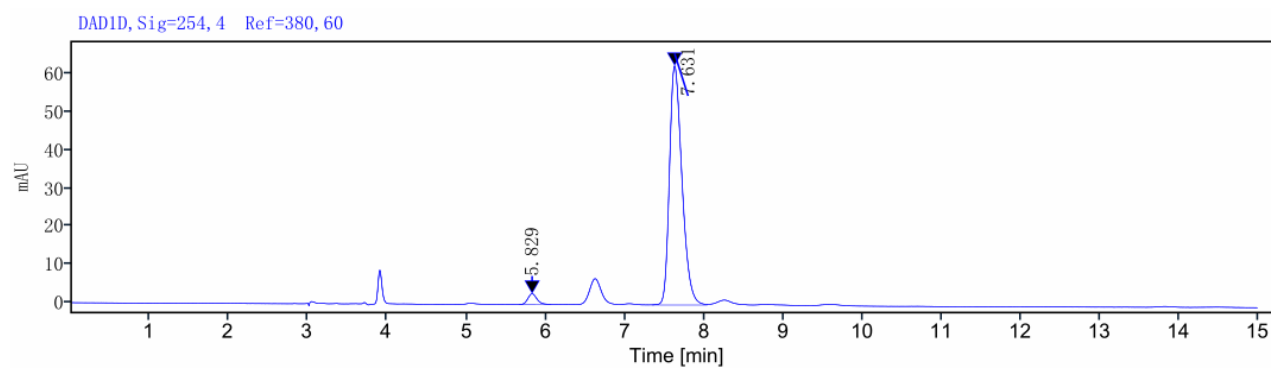

**Signal:** DAD1D, Sig=254, 4 Ref=380, 60

| RetTime [min] | Type | Width [min] | Area [mAU*s] | Height [mAU] | Area %  |
|---------------|------|-------------|--------------|--------------|---------|
| 5.829         | VB   | 0.41217     | 22.26883     | 2.81679      | 3.1162  |
| 7.631         | VV   | 0.69279     | 692.33852    | 62.92994     | 96.8838 |
| Totals        |      |             | 714.60736    |              |         |

Supplementary Fig. 129 HPLC data of 54 and 55.

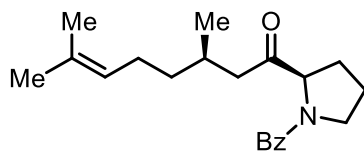

(*S, R*)-L1: 97:3 dr

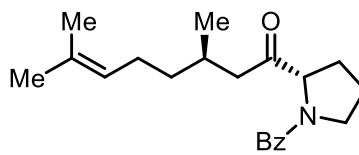

(*R, S*)-L1: 3:97 dr

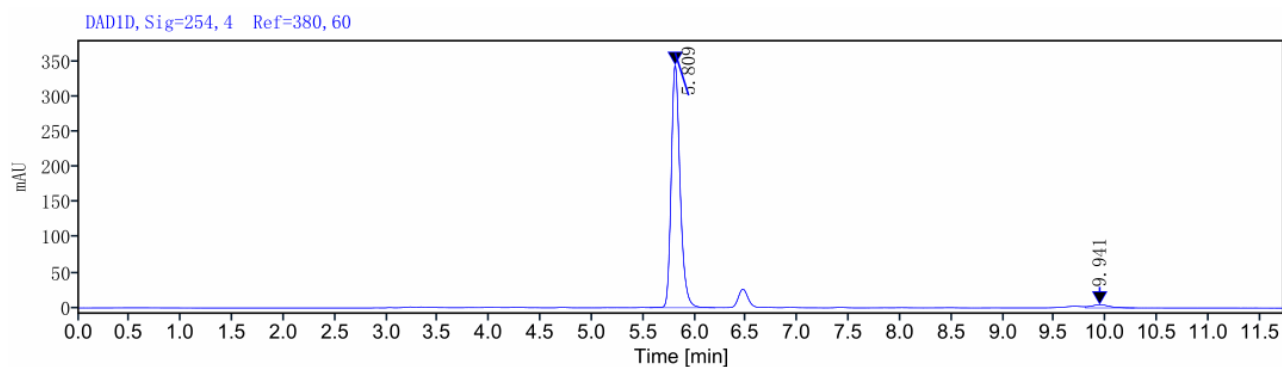

**Signal:** DAD1D, Sig=254, 4 Ref=380, 60

| RetTime<br>[min] | Type | Width<br>[min] | Area<br>[mAU*s] | Height<br>[mAU] | Area<br>% |
|------------------|------|----------------|-----------------|-----------------|-----------|
| 5.809            | VB   | 0.63260        | 2069.33096      | 344.28535       | 97.3441   |
| 9.941            | VB   | 0.47866        | 56.45899        | 4.62971         | 2.6559    |
| Totals           |      |                | 2125.78995      |                 |           |

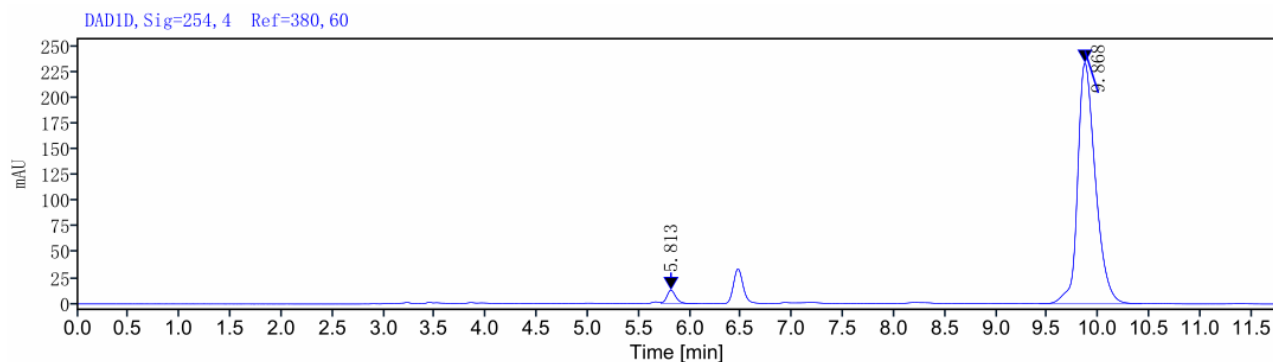

**Signal:** DAD1D, Sig=254, 4 Ref=380, 60

| RetTime<br>[min] | Type | Width<br>[min] | Area<br>[mAU*s] | Height<br>[mAU] | Area<br>% |
|------------------|------|----------------|-----------------|-----------------|-----------|
| 5.813            | VV   | 0.35635        | 82.04512        | 13.12213        | 2.8009    |
| 9.868            | VV   | 1.00646        | 2847.20983      | 234.34811       | 97.1991   |
| Totals           |      |                | 2929.25495      |                 |           |

**Supplementary Fig. 130** HPLC data of 56 and 57.

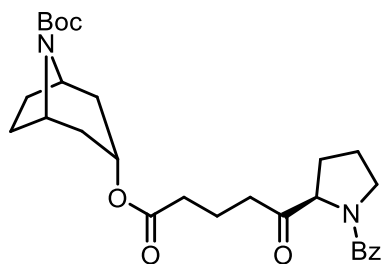

(S, R)-L1: 99:1 dr

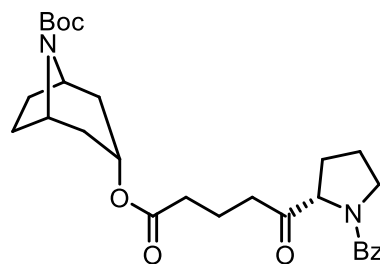

(R, S)-L1: 1:99 dr

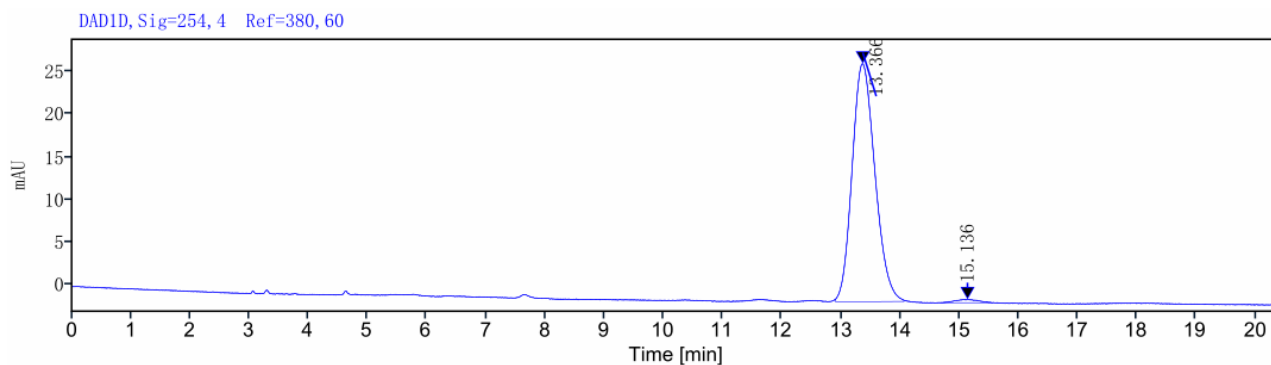

Signal: DAD1D, Sig=254, 4 Ref=380, 60

| RetTime [min] | Type | Width [min] | Area [mAU*s] | Height [mAU] | Area %  |
|---------------|------|-------------|--------------|--------------|---------|
| 13.366        | VV   | 1.15598     | 747.61594    | 27.89144     | 98.6698 |
| 15.136        | MM m | 0.85355     | 10.07895     | 0.40539      | 1.3302  |
| Totals        |      |             | 757.69489    |              |         |

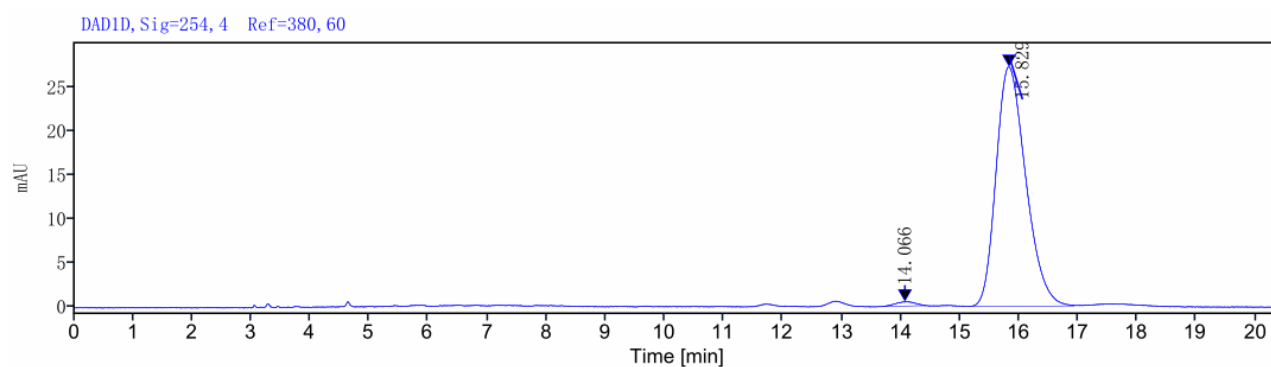

Signal: DAD1D, Sig=254, 4 Ref=380, 60

| RetTime [min] | Type | Width [min] | Area [mAU*s] | Height [mAU] | Area %  |
|---------------|------|-------------|--------------|--------------|---------|
| 14.066        | MM m | 0.73582     | 11.07518     | 0.50254      | 1.1570  |
| 15.829        | VM m | 1.71179     | 946.14787    | 27.10817     | 98.8430 |
| Totals        |      |             | 957.22304    |              |         |

Supplementary Fig. 131 HPLC data of 58 and 59.

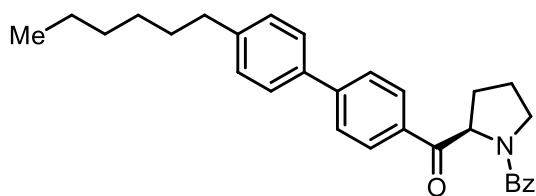

(*S, R*)-L2: 95% ee

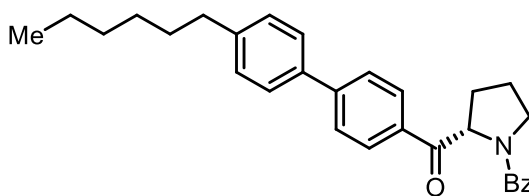

(*R, S*)-L2: 94% ee

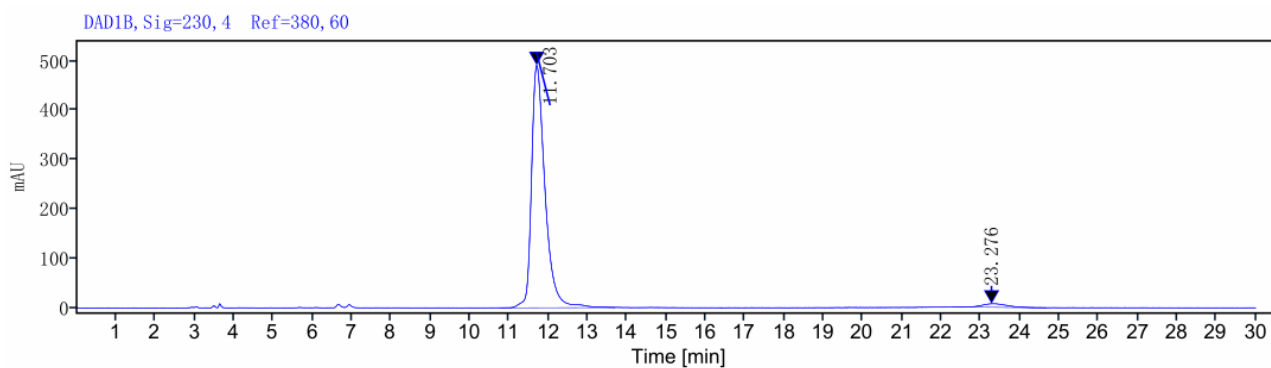

**Signal:** DAD1B, Sig=230, 4 Ref=380, 60

| RetTime [min] | Type | Width [min] | Area [mAU*s] | Height [mAU] | Area %  |
|---------------|------|-------------|--------------|--------------|---------|
| 11.703        | MM m | 2.92732     | 11727.16162  | 491.44861    | 97.3769 |
| 23.276        | MM m | 2.40734     | 315.90624    | 7.39323      | 2.6231  |
| Totals        |      |             | 12043.06786  |              |         |

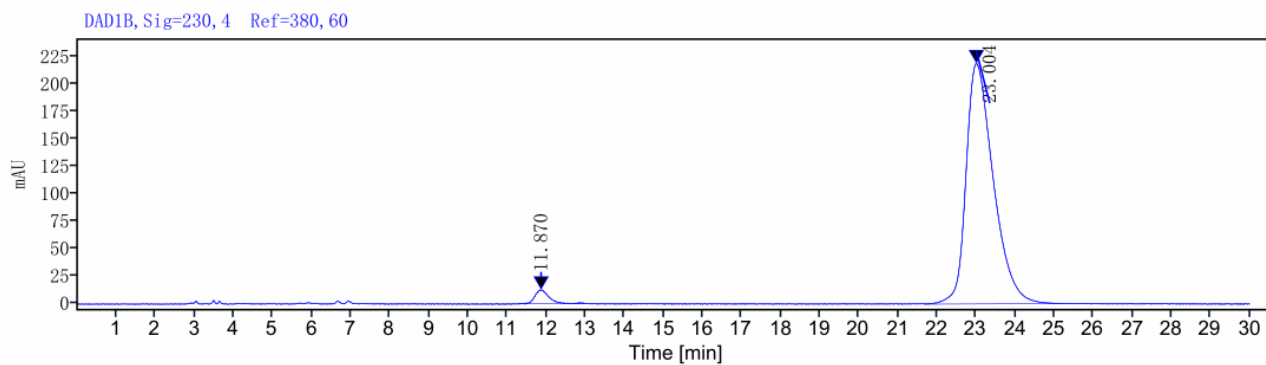

**Signal:** DAD1B, Sig=230, 4 Ref=380, 60

| RetTime [min] | Type | Width [min] | Area [mAU*s] | Height [mAU] | Area %  |
|---------------|------|-------------|--------------|--------------|---------|
| 11.870        | MM m | 1.69307     | 303.84372    | 12.74945     | 2.7844  |
| 23.004        | MM m | 3.51842     | 10608.34441  | 219.06971    | 97.2156 |
| Totals        |      |             | 10912.18812  |              |         |

Supplementary Fig. 132 HPLC data of 60.

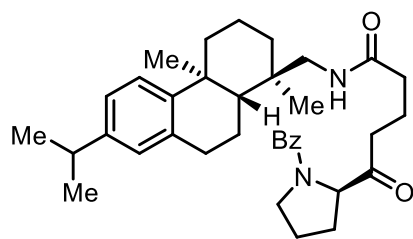

(S, R)-L1: 99:1 dr

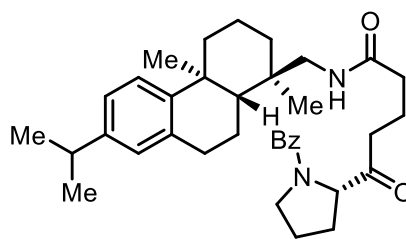

(R, S)-L1: 1:99 dr

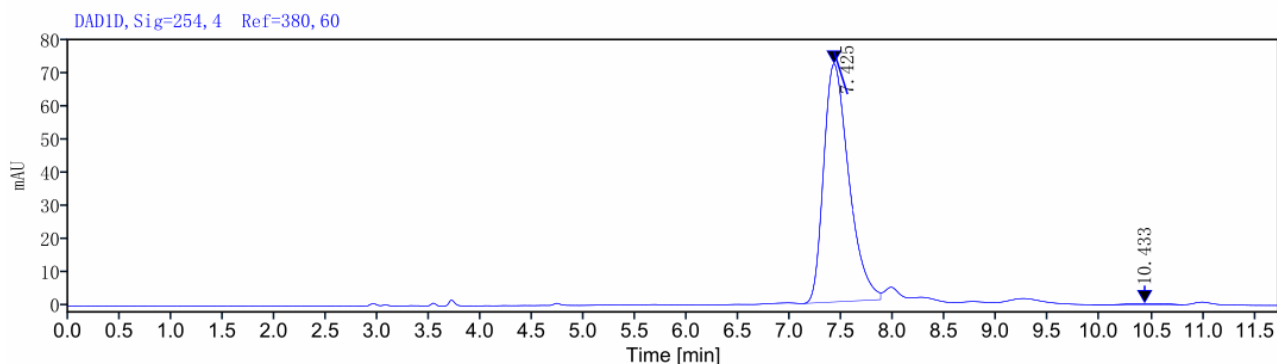

**Signal:** DAD1D, Sig=254, 4 Ref=380, 60

| RetTime<br>[min] | Type | Width<br>[min] | Area<br>[mAU*s] | Height<br>[mAU] | Area<br>% |
|------------------|------|----------------|-----------------|-----------------|-----------|
| 7.425            | BV   | 0.75106        | 1217.16340      | 71.66412        | 99.2268   |
| 10.433           | MM m | 0.88656        | 9.48476         | 0.38906         | 0.7732    |
| Totals           |      |                | 1226.64816      |                 |           |

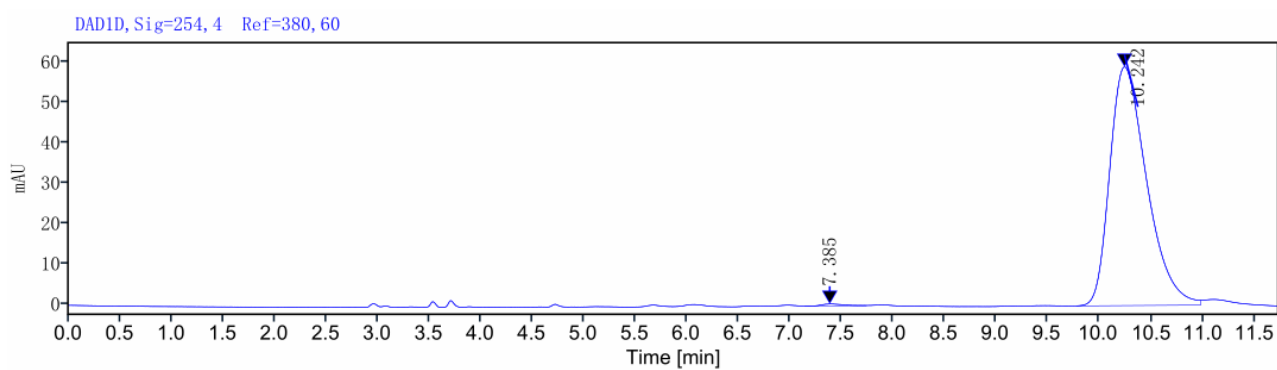

**Signal:** DAD1D, Sig=254, 4 Ref=380, 60

| RetTime<br>[min] | Type | Width<br>[min] | Area<br>[mAU*s] | Height<br>[mAU] | Area<br>% |
|------------------|------|----------------|-----------------|-----------------|-----------|
| 7.385            | MM m | 0.59902        | 6.28652         | 0.47162         | 0.4278    |
| 10.242           | BV   | 1.20348        | 1463.35403      | 58.78599        | 99.5722   |
| Totals           |      |                | 1469.64055      |                 |           |

Supplementary Fig. 133 HPLC data of 61 and 62.

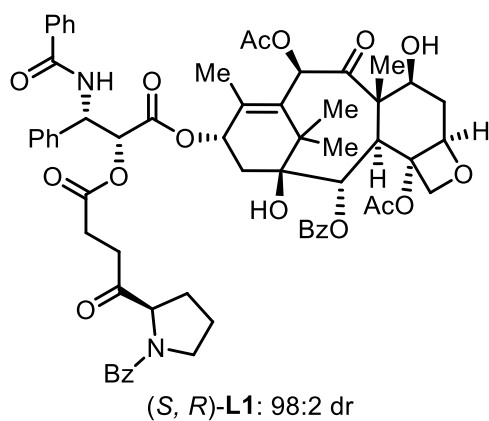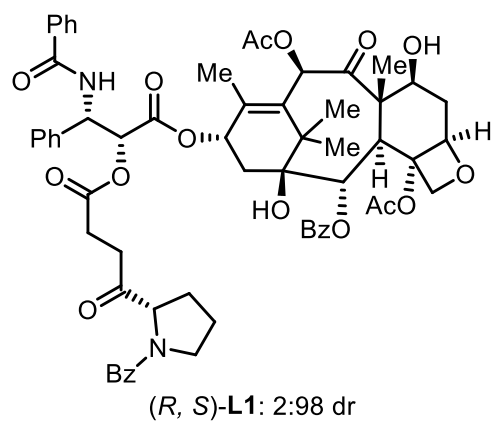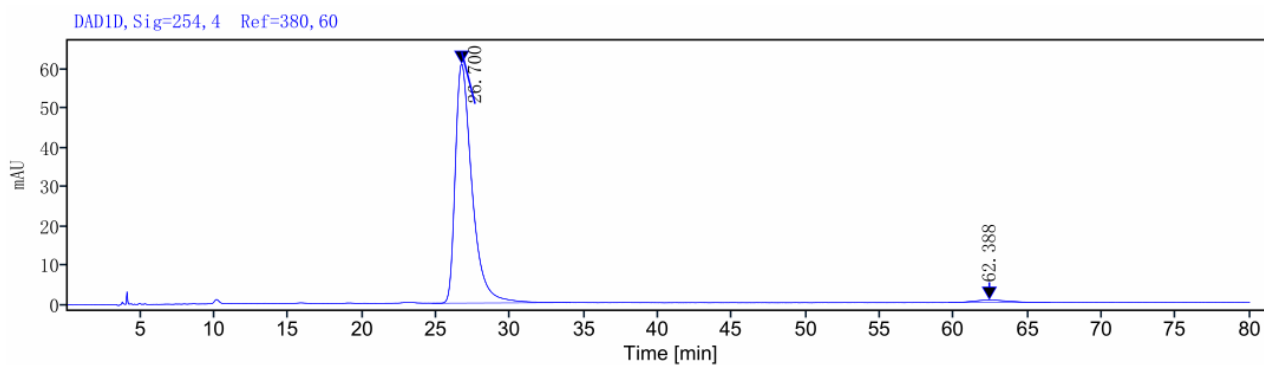

**Signal:** DAD1D, Sig=254, 4 Ref=380, 60

| RetTime [min] | Type | Width [min] | Area [mAU*s] | Height [mAU] | Area %  |
|---------------|------|-------------|--------------|--------------|---------|
| 26.700        | MM m | 9.38262     | 4783.57652   | 60.77019     | 97.9252 |
| 62.388        | MM m | 6.91351     | 101.35183    | 0.66165      | 2.0748  |
| Totals        |      |             | 4884.92835   |              |         |

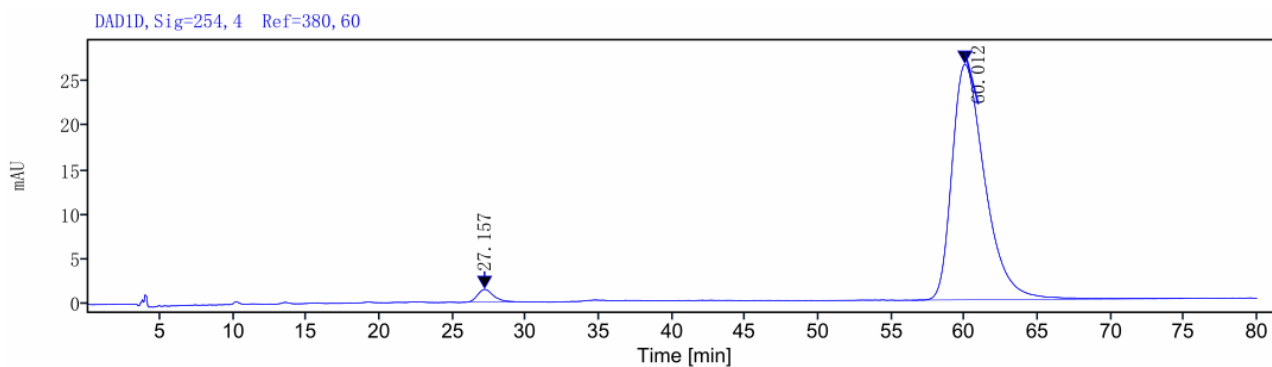

**Signal:** DAD1D, Sig=254, 4 Ref=380, 60

| RetTime [min] | Type | Width [min] | Area [mAU*s] | Height [mAU] | Area %  |
|---------------|------|-------------|--------------|--------------|---------|
| 27.157        | MM m | 3.03348     | 99.18794     | 1.40117      | 2.3390  |
| 60.012        | MM m | 18.69469    | 4141.37900   | 26.41786     | 97.6610 |
| Totals        |      |             | 4240.56694   |              |         |

Supplementary Fig. 134 HPLC data of 63 and 64.

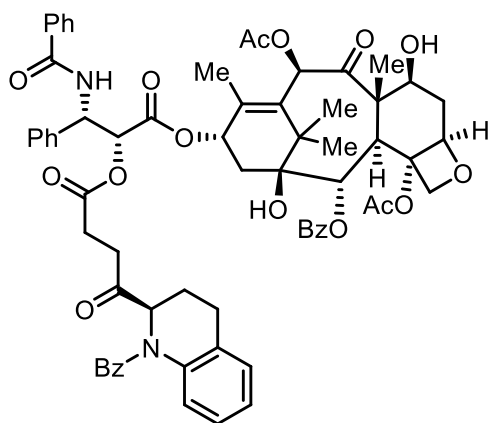

(*S, R*)-L1: 98:2 dr

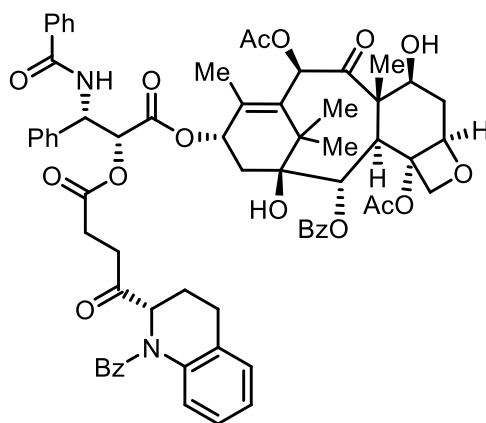

(*R, S*)-L1: 2:98 dr

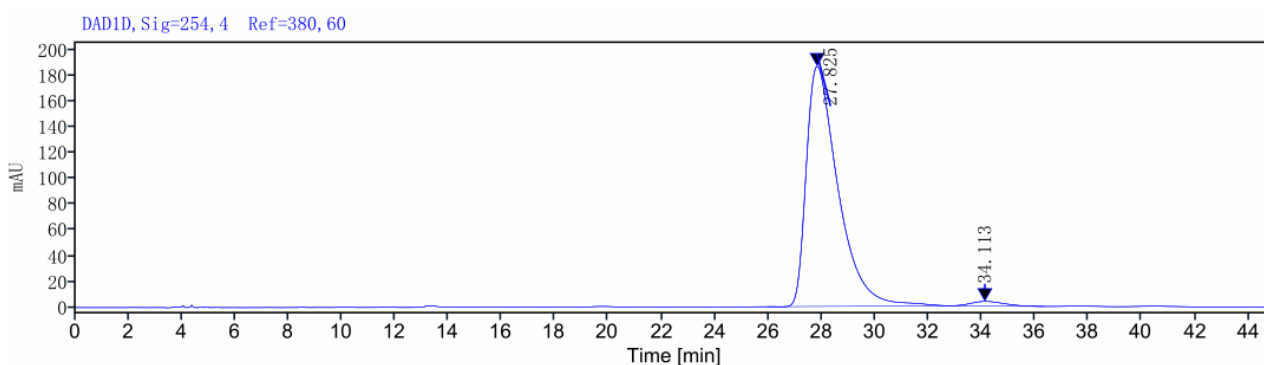

Signal: DAD1D, Sig=254, 4 Ref=380, 60

| RetTime [min] | Type | Width [min] | Area [mAU*s] | Height [mAU] | Area %  |
|---------------|------|-------------|--------------|--------------|---------|
| 27.825        | MM m | 7.00188     | 15388.58555  | 186.30619    | 98.1102 |
| 34.113        | MM m | 3.38293     | 296.40989    | 3.49214      | 1.8898  |
| Totals        |      |             | 15684.99544  |              |         |

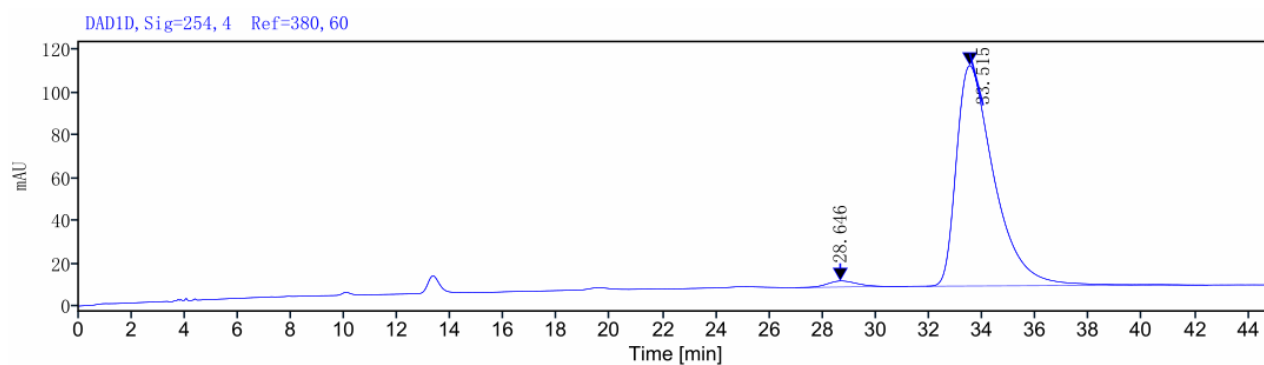

Signal: DAD1D, Sig=254, 4 Ref=380, 60

| RetTime [min] | Type | Width [min] | Area [mAU*s] | Height [mAU] | Area %  |
|---------------|------|-------------|--------------|--------------|---------|
| 28.646        | MM m | 4.23276     | 218.52909    | 2.84000      | 2.1074  |
| 33.515        | MM m | 10.58190    | 10151.25622  | 102.83549    | 97.8926 |
| Totals        |      |             | 10369.78531  |              |         |

Supplementary Fig. 135 HPLC data of 65 and 66.

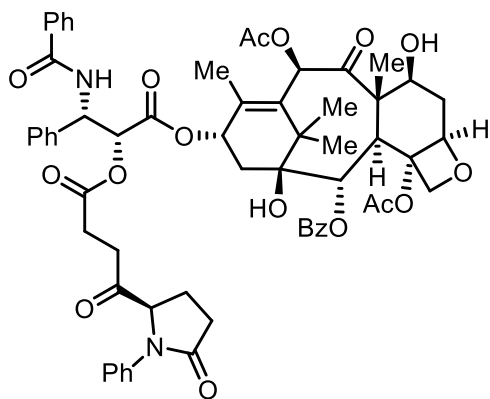

(*S, R*)-L2: 95:5 dr

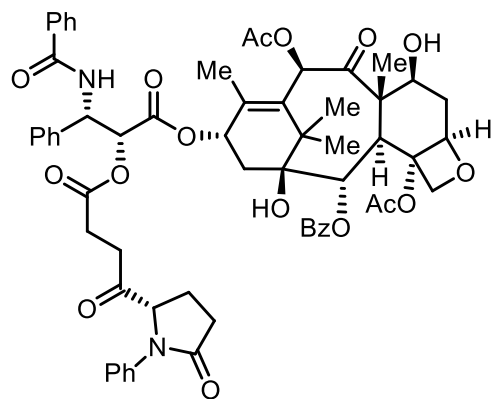

(*R, S*)-L2: 5:95 dr

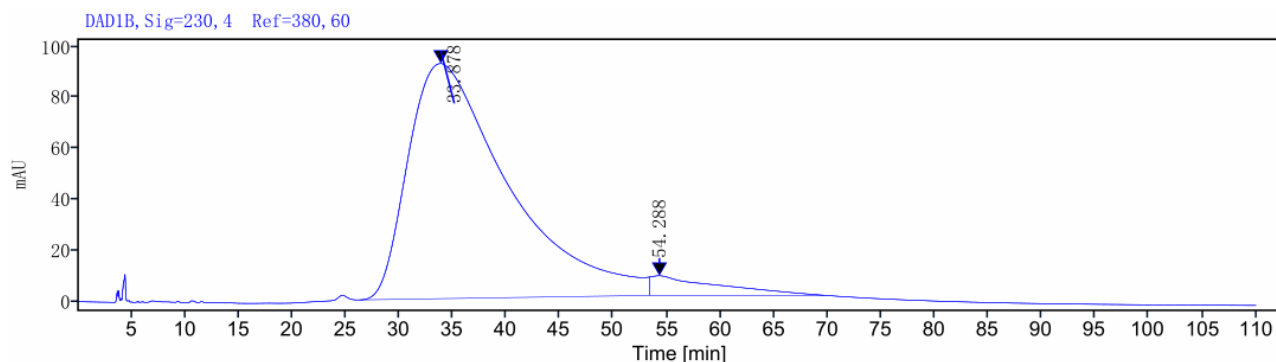

**Signal:** DAD1B, Sig=230, 4 Ref=380, 60

| RetTime [min] | Type | Width [min] | Area [mAU*s] | Height [mAU] | Area %  |
|---------------|------|-------------|--------------|--------------|---------|
| 33.878        | MM m | 27.00935    | 59989.48362  | 92.27735     | 94.7039 |
| 54.288        | MM m | 16.35514    | 3354.77289   | 7.71490      | 5.2961  |
| Totals        |      |             | 63344.25651  |              |         |

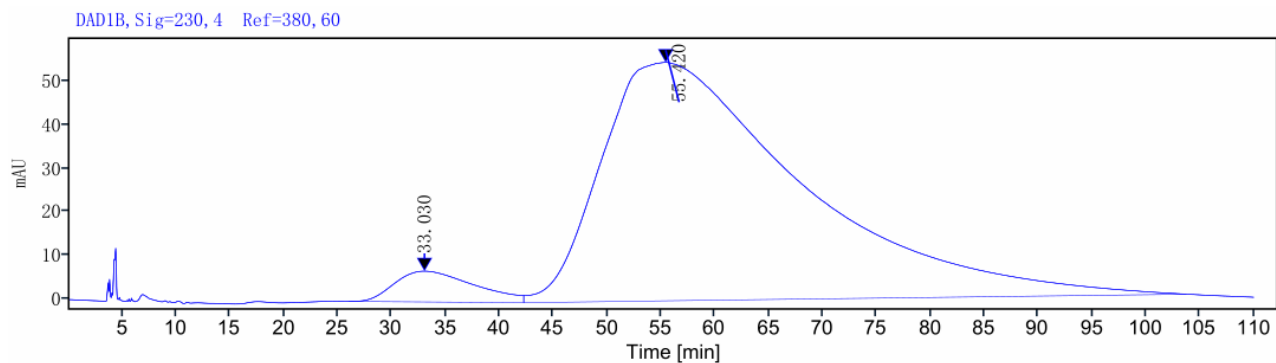

**Signal:** DAD1B, Sig=230, 4 Ref=380, 60

| RetTime [min] | Type | Width [min] | Area [mAU*s] | Height [mAU] | Area %  |
|---------------|------|-------------|--------------|--------------|---------|
| 33.030        | MM m | 16.26168    | 3633.15598   | 7.06149      | 4.8848  |
| 55.420        | MM m | 61.49533    | 70742.87116  | 54.59314     | 95.1152 |
| Totals        |      |             | 74376.02714  |              |         |

Supplementary Fig. 136 HPLC data of 67 and 68.

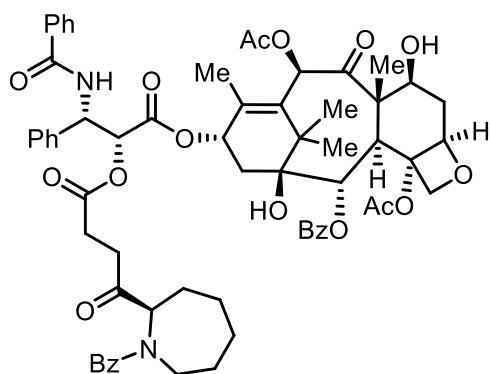

(S, R)-L1: 95:5 dr

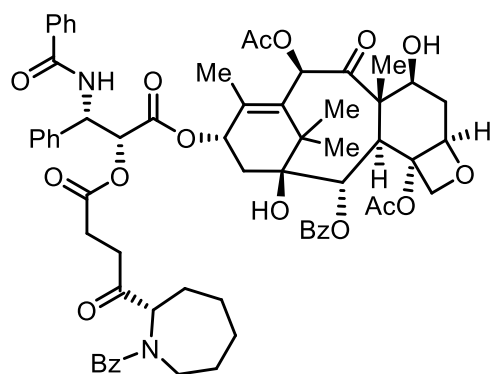

(R, S)-L1: 7:93 dr

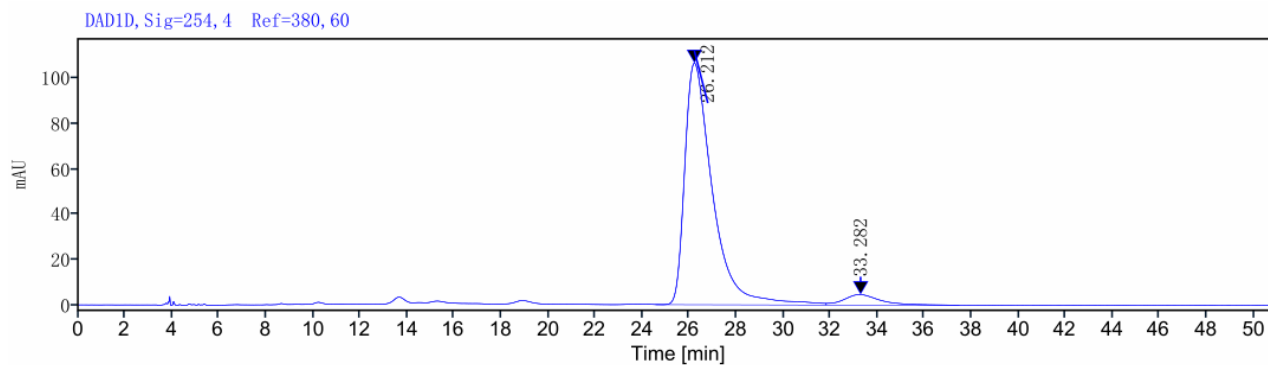

**Signal:** DAD1D, Sig=254, 4 Ref=380, 60

| RetTime<br>[min] | Type | Width<br>[min] | Area<br>[mAU*s] | Height<br>[mAU] | Area<br>% |
|------------------|------|----------------|-----------------|-----------------|-----------|
| 26.212           | MM m | 7.25437        | 8775.45751      | 107.00809       | 94.7167   |
| 33.282           | MM m | 5.66572        | 489.49470       | 4.66956         | 5.2833    |
| Totals           |      |                | 9264.95221      |                 |           |

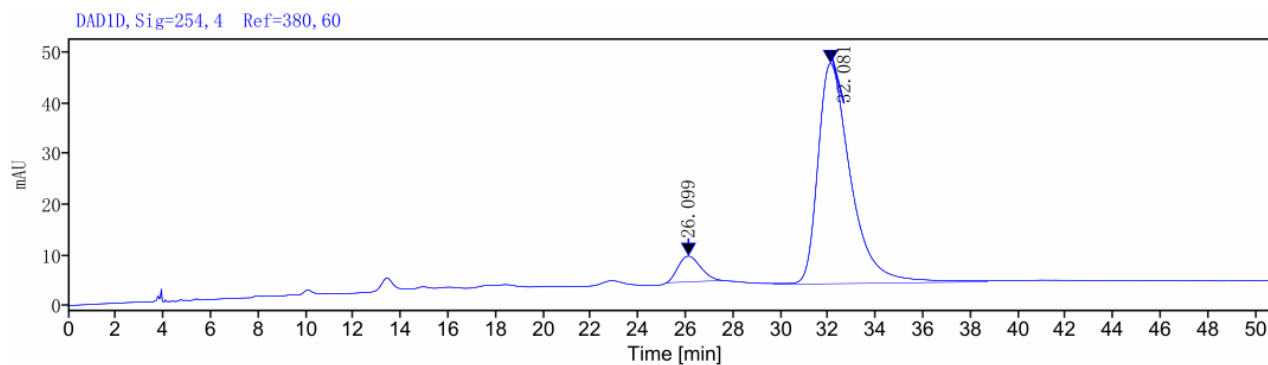

**Signal:** DAD1D, Sig=254, 4 Ref=380, 60

| RetTime<br>[min] | Type | Width<br>[min] | Area<br>[mAU*s] | Height<br>[mAU] | Area<br>% |
|------------------|------|----------------|-----------------|-----------------|-----------|
| 26.099           | MM m | 2.36684        | 335.60840       | 5.10551         | 7.4203    |
| 32.081           | MM m | 9.00432        | 4187.21470      | 43.64354        | 92.5797   |
| Totals           |      |                | 4522.82310      |                 |           |

Supplementary Fig. 137 HPLC data of 69 and 70.

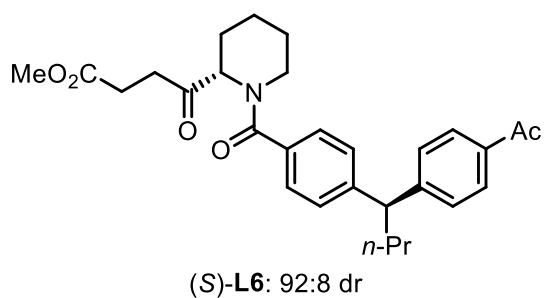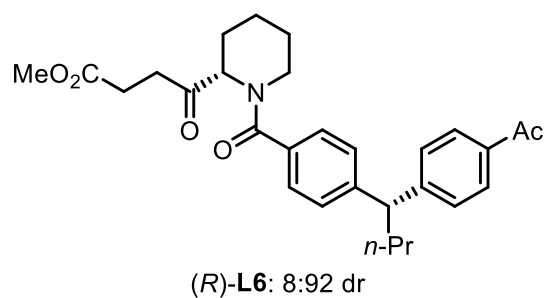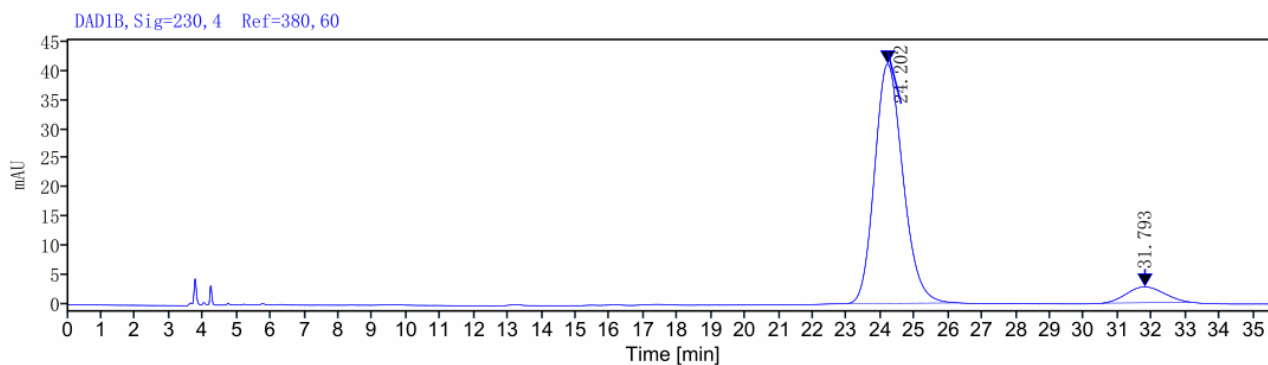

**Signal:** DAD1B, Sig=230, 4 Ref=380, 60

| RetTime [min] | Type | Width [min] | Area [mAU*s] | Height [mAU] | Area %  |
|---------------|------|-------------|--------------|--------------|---------|
| 24.202        | VM m | 3.22008     | 2390.04028   | 41.13919     | 91.9664 |
| 31.793        | MM m | 2.60721     | 208.77855    | 2.73659      | 8.0336  |
| Totals        |      |             | 2598.81883   |              |         |

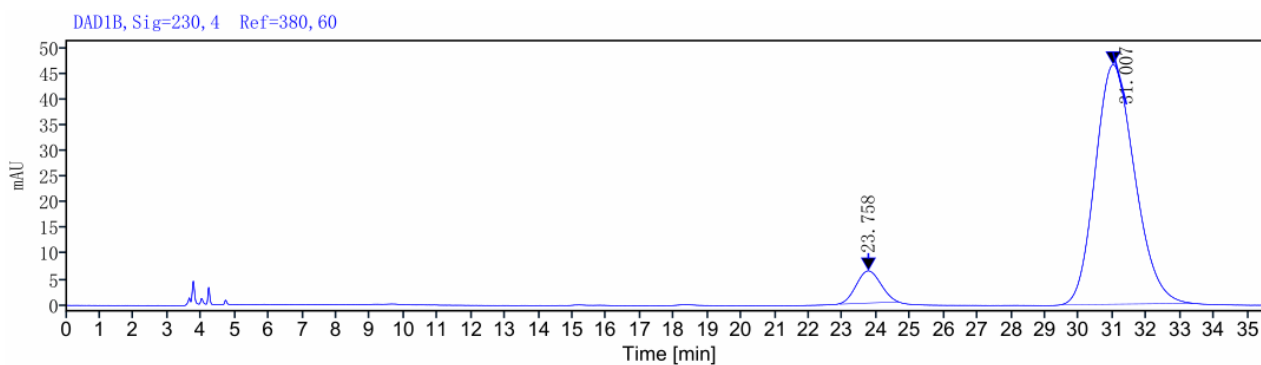

**Signal:** DAD1B, Sig=230, 4 Ref=380, 60

| RetTime [min] | Type | Width [min] | Area [mAU*s] | Height [mAU] | Area %  |
|---------------|------|-------------|--------------|--------------|---------|
| 23.758        | VM m | 1.74700     | 316.41971    | 6.27877      | 7.6970  |
| 31.007        | VM m | 3.87090     | 3794.54717   | 46.64473     | 92.3030 |
| Totals        |      |             | 4110.96688   |              |         |

Supplementary Fig. 138 HPLC data of 71 and 72.

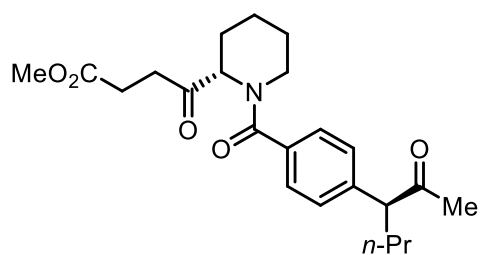

(S)-L3: 97:3 dr

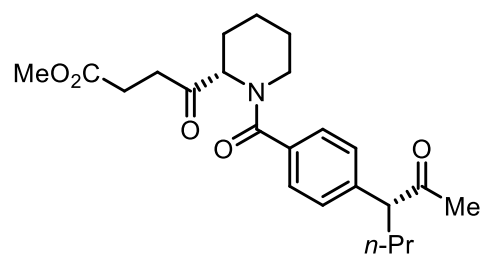

(R)-L3: 2:98 dr

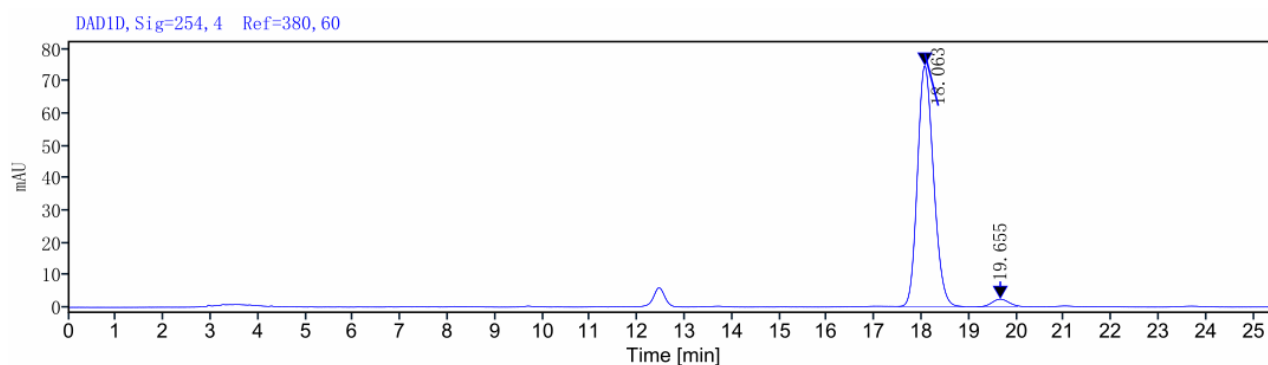

Signal: DAD1D, Sig=254, 4 Ref=380, 60

| RetTime [min] | Type | Width [min] | Area [mAU*s] | Height [mAU] | Area %  |
|---------------|------|-------------|--------------|--------------|---------|
| 18.063        | VV   | 1.38008     | 1767.31892   | 74.70148     | 96.8406 |
| 19.655        | BV m | 0.84835     | 57.65918     | 2.37505      | 3.1594  |
| Totals        |      |             | 1824.97810   |              |         |

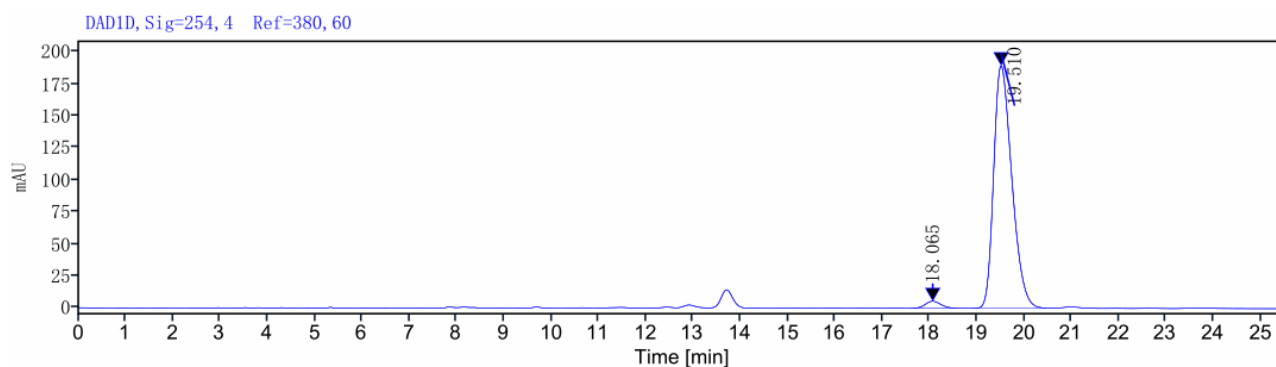

Signal: DAD1D, Sig=254, 4 Ref=380, 60

| RetTime [min] | Type | Width [min] | Area [mAU*s] | Height [mAU] | Area %  |
|---------------|------|-------------|--------------|--------------|---------|
| 18.065        | VV   | 0.91903     | 129.84812    | 5.61779      | 2.4959  |
| 19.510        | VV   | 1.55511     | 5072.63788   | 190.08166    | 97.5041 |
| Totals        |      |             | 5202.48600   |              |         |

Supplementary Fig. 139 HPLC data of 73 and 74.

## II. Supplementary References

1. Aubineau, T. & Cossy, J. Chemoselective alkynylation of *N*-sulfonylamides *versus* amides and carbamates – synthesis of tetrahydropyrazines. *Chem. Commun.* **49**, 3303–3305 (2013).
2. Cheng, X., Lu, H. & Lu, Z. Enantioselective benzylic C–H arylation via photoredox and nickel dual catalysis. *Nat. Commun.* **10**, 3549 (2019).
3. Shu, X., Zhong, D., Lin, Y., Qin, X. & Huo, H. Modular access to chiral  $\alpha$ -(hetero)aryl amines via Ni/photoredox-catalyzed enantioselective cross-coupling. *J. Am. Chem. Soc.* **144**, 8797–8806 (2022).
4. Huan, L., Shu, X., Zu, W., Zhong, D. & Huo, H. Asymmetric benzylic C(sp<sup>3</sup>)–H acylation via dual nickel and photoredox catalysis. *Nat. Commun.* **12**, 3536 (2021).
5. Sun, Z., Kumagai, N. & Shibasaki, M. Photocatalytic  $\alpha$ -acylation of ethers. *Org. Lett.* **19**, 3727–3730 (2017).
6. Dolomanov, O. V., Bourhis, L. J., Gildea, R. J., Howard, J. A. K. & Puschmann, H. OLEX2: A complete structure solution, refinement and analysis program. *J. Appl. Cryst.* **42**, 339–341 (2009).
7. Bourhis, L. J., Dolomanov, O. V., Gildea, R. J., Howard, J. A. K. & Puschmann, H. The anatomy of a comprehensive constrained, restrained refinement program for the modern computing environment - Olex2 dissected. *Acta Cryst. A* **71**, 59–75 (2015).
8. Sheldrick, G. M. Crystal structure refinement with SHELXL. *Acta Cryst. C* **71**, 3–8 (2015).
